# Supplementary material for: Whole-transcriptome sequencing and ceRNA interaction network of temporomandibular joint osteoarthritis
Source: Front Genet. 2022 Oct 5;13:962574. doi: 10.3389/fgene.2022.962574 (PMC9581126; doi:10.3389/fgene.2022.962574)
Supplement: Supplementary file 1 [file Table2.XLSX]

## Sheet: Sheet1
pathway_id	pathway_name	pvalue	Gene_ID	Gene_name	KO_ENTRY	EC	Description	FPKM.UAC1	FPKM.UAC2	FPKM.UAC3	FPKM.CONT_1	FPKM.CONT_2	FPKM.CONT_3	fc	log2(fc)	regulation
ko05162	Measles	0.00411277	ENSRNOG00000049282	Oas2	K14216	EC:2.7.7.84	2'-5' oligoadenylate synthetase 2 [Source:RGD Symbol;Acc:1359697]	1.13584	0.796252	0.431963	0.36197	0.392657	0.369048	2.10386	1.07304	up
ko05162	Measles	0.00411277	MSTRG.17011	Hspa1b	K03283	NA	heat shock protein family A (Hsp70) member 1B [Source:RGD Symbol;Acc:2840]	5.24329	5.52474	2.7742	7.21687	11.7813	14.7747	0.40098	-1.3184	down
ko05162	Measles	0.00411277	MSTRG.27243	Cd3g	K06452	NA	CD3g molecule [Source:RGD Symbol;Acc:1307718]	3.1597	3.36923	1.43494	0.802837	0.611571	1.27998	2.95572	1.56351	up
ko05162	Measles	0.00411277	MSTRG.3425	Irf7	K09447	NA	interferon regulatory factor 7 [Source:RGD Symbol;Acc:1307828]	3.76225	5.28163	2.92289	1.06032	1.17443	1.60451	3.11694	1.64013	up
ko03320	PPAR signaling pathway	0.00614293	ENSRNOG00000015086	Plin1	K08768	NA	perilipin 1 [Source:RGD Symbol;Acc:3351]	0.58075	0.293959	0.488433	0.106797	0.123819	0.12879	3.79277	1.92325	up
ko03320	PPAR signaling pathway	0.00614293	MSTRG.16315	Hmgcs2	K01641	EC:2.3.3.10	3-hydroxy-3-methylglutaryl-CoA synthase 2 [Source:RGD Symbol;Acc:2804]	0.615012	0.301299	0.622912	0.289258	0.233091	0.131719	2.35331	1.23469	up
ko03320	PPAR signaling pathway	0.00614293	MSTRG.7077	Adipoq	K07296	NA	adiponectin, C1Q and collagen domain containing [Source:RGD Symbol;Acc:628748]	1.56388	0.891889	1.23395	0.20421	0.211193	0.290087	5.23001	2.38681	up
ko00785	Lipoic acid metabolism	0.0142213	MSTRG.2812	Lipt2	K03801	EC:2.3.1.181	lipoyl(octanoyl) transferase 2 [Source:RGD Symbol;Acc:1305211]	0.283157	0.506009	0.480529	0.88151	1.24304	0.745033	0.442466	-1.17636	down
ko04978	Mineral absorption	0.0184246	ENSRNOG00000013053	Trpm6	K04981	EC:2.7.11.1	transient receptor potential cation channel, subfamily M, member 6 [Source:RGD Symbol;Acc:1309942]	0.230886	0.220623	0.230274	0.013119	0.115142	0.093009	3.08123	1.6235	up
ko04978	Mineral absorption	0.0184246	MSTRG.13940	Mt2A	K14739	NA	metallothionein 2A [Source:RGD Symbol;Acc:1592345]	29.572	46.2534	20.3646	9.09823	9.9753	10.0336	3.30469	1.72452	up
ko04913	Ovarian steroidogenesis	0.0234365	ENSRNOG00000019500	Cyp1a1	K07408	EC:1.14.14.1	cytochrome P450, family 1, subfamily a, polypeptide 1 [Source:RGD Symbol;Acc:2458]	0.03592	0.0001	0.081544	0.280251	0.378238	0.727885	0.0847996	-3.5598	down
ko04913	Ovarian steroidogenesis	0.0234365	ENSRNOG00000026764	Pla2g4c	K16342	EC:3.1.1.4	phospholipase A2 group IVC [Source:RGD Symbol;Acc:1594658]	0.486308	0.281544	0.148092	0.0390525	0.0591423	0.217515	2.90122	1.53666	up
ko04923	Regulation of lipolysis in adipocytes	0.0289429	ENSRNOG00000003972	Tshr	K04249	NA	thyroid stimulating hormone receptor [Source:RGD Symbol;Acc:3911]	0.489374	0.184589	0.289544	0.094947	0.190353	0.167872	2.12614	1.08824	up
ko04923	Regulation of lipolysis in adipocytes	0.0289429	ENSRNOG00000015086	Plin1	K08768	NA	perilipin 1 [Source:RGD Symbol;Acc:3351]	0.58075	0.293959	0.488433	0.106797	0.123819	0.12879	3.79277	1.92325	up
ko04730	Long-term depression	0.031872	ENSRNOG00000026764	Pla2g4c	K16342	EC:3.1.1.4	phospholipase A2 group IVC [Source:RGD Symbol;Acc:1594658]	0.486308	0.281544	0.148092	0.0390525	0.0591423	0.217515	2.90122	1.53666	up
ko04730	Long-term depression	0.031872	ENSRNOG00000045816	Gria1	K05197	NA	glutamate ionotropic receptor AMPA type subunit 1 [Source:RGD Symbol;Acc:621531]	0.153662	0.0781212	0.0762892	0.328888	0.272742	0.303107	0.34051	-1.55423	down
ko04213	Longevity regulating pathway - multiple species	0.0349134	MSTRG.17011	Hspa1b	K03283	NA	heat shock protein family A (Hsp70) member 1B [Source:RGD Symbol;Acc:2840]	5.24329	5.52474	2.7742	7.21687	11.7813	14.7747	0.40098	-1.3184	down
ko04213	Longevity regulating pathway - multiple species	0.0349134	MSTRG.27342	Cryab	K09542	NA	crystallin, alpha B [Source:RGD Symbol;Acc:2414]	4.40167	3.16475	1.93664	6.6383	11.8965	6.47058	0.380041	-1.39577	down
ko05160	Hepatitis C	0.0357553	ENSRNOG00000001926	Cldn1	K06087	NA	claudin 1 [Source:RGD Symbol;Acc:68422]	0.488957	0.588734	0.237891	0.155539	0.268818	0.188699	2.14594	1.10161	up
ko05160	Hepatitis C	0.0357553	ENSRNOG00000049282	Oas2	K14216	EC:2.7.7.84	2'-5' oligoadenylate synthetase 2 [Source:RGD Symbol;Acc:1359697]	1.13584	0.796252	0.431963	0.36197	0.392657	0.369048	2.10386	1.07304	up
ko05160	Hepatitis C	0.0357553	MSTRG.3425	Irf7	K09447	NA	interferon regulatory factor 7 [Source:RGD Symbol;Acc:1307828]	3.76225	5.28163	2.92289	1.06032	1.17443	1.60451	3.11694	1.64013	up
ko03010	Ribosome	0.0419132	MSTRG.16301	LOC685963	K02923	NA	similar to 60S ribosomal protein L38 [Source:RGD Symbol;Acc:1587812]	9.62033	24.8426	7.96908	8.04825	3.22774	4.20371	2.74114	1.45478	up
ko03010	Ribosome	0.0419132	MSTRG.23291	LOC100362149	K02969	NA	ribosomal protein S20-like [Source:RGD Symbol;Acc:2318734]	5.17524	3.97197	5.25486	4.70844	14.5374	10.2089	0.488957	-1.03222	down
ko03010	Ribosome	0.0419132	MSTRG.28488	LOC100362684	K02969	NA	ribosomal protein S20-like [Source:RGD Symbol;Acc:2324274]	4.34034	18.8852	4.45946	4.11471	2.30514	4.54696	2.52444	1.33596	up
ko00072	Synthesis and degradation of ketone bodies	0.0420757	MSTRG.16315	Hmgcs2	K01641	EC:2.3.3.10	3-hydroxy-3-methylglutaryl-CoA synthase 2 [Source:RGD Symbol;Acc:2804]	0.615012	0.301299	0.622912	0.289258	0.233091	0.131719	2.35331	1.23469	up
ko04122	Sulfur relay system	0.0420757	MSTRG.19371	Nfs1	K04487	EC:2.8.1.7	NFS1 cysteine desulfurase [Source:RGD Symbol;Acc:620912]	3.63526	0.0001	3.65634	0.0001	0.0001	0.0001	24305.7	14.569	up
ko05164	Influenza A	0.0425568	ENSRNOG00000049282	Oas2	K14216	EC:2.7.7.84	2'-5' oligoadenylate synthetase 2 [Source:RGD Symbol;Acc:1359697]	1.13584	0.796252	0.431963	0.36197	0.392657	0.369048	2.10386	1.07304	up
ko05164	Influenza A	0.0425568	MSTRG.17011	Hspa1b	K03283	NA	heat shock protein family A (Hsp70) member 1B [Source:RGD Symbol;Acc:2840]	5.24329	5.52474	2.7742	7.21687	11.7813	14.7747	0.40098	-1.3184	down
ko05164	Influenza A	0.0425568	MSTRG.3425	Irf7	K09447	NA	interferon regulatory factor 7 [Source:RGD Symbol;Acc:1307828]	3.76225	5.28163	2.92289	1.06032	1.17443	1.60451	3.11694	1.64013	up
ko04260	Cardiac muscle contraction	0.0528855	MSTRG.10649	Myh6	K17751	NA	myosin heavy chain 7 [Source:RGD Symbol;Acc:62030];myosin heavy chain 6 [Source:RGD Symbol;Acc:62029]	0.997238	1.06135	0.328905	1.69535	2.31046	1.00868	0.476118	-1.07061	down
ko04260	Cardiac muscle contraction	0.0528855	MSTRG.1771	Tnni3	K19752	NA	dynein, axonemal, assembly factor 3 [Source:RGD Symbol;Acc:2323487];troponin I3, cardiac type [Source:RGD Symbol;Acc:62052]	0.232226	0.361112	0.142345	0.656005	0.490498	0.460709	0.457739	-1.1274	down
ko05410	Hypertrophic cardiomyopathy (HCM)	0.0603172	MSTRG.10649	Myh6	K17751	NA	myosin heavy chain 7 [Source:RGD Symbol;Acc:62030];myosin heavy chain 6 [Source:RGD Symbol;Acc:62029]	0.997238	1.06135	0.328905	1.69535	2.31046	1.00868	0.476118	-1.07061	down
ko05410	Hypertrophic cardiomyopathy (HCM)	0.0603172	MSTRG.1771	Tnni3	K19752	NA	dynein, axonemal, assembly factor 3 [Source:RGD Symbol;Acc:2323487];troponin I3, cardiac type [Source:RGD Symbol;Acc:62052]	0.232226	0.361112	0.142345	0.656005	0.490498	0.460709	0.457739	-1.1274	down
ko05414	Dilated cardiomyopathy (DCM)	0.0641613	MSTRG.10649	Myh6	K17751	NA	myosin heavy chain 7 [Source:RGD Symbol;Acc:62030];myosin heavy chain 6 [Source:RGD Symbol;Acc:62029]	0.997238	1.06135	0.328905	1.69535	2.31046	1.00868	0.476118	-1.07061	down
ko05414	Dilated cardiomyopathy (DCM)	0.0641613	MSTRG.1771	Tnni3	K19752	NA	dynein, axonemal, assembly factor 3 [Source:RGD Symbol;Acc:2323487];troponin I3, cardiac type [Source:RGD Symbol;Acc:62052]	0.232226	0.361112	0.142345	0.656005	0.490498	0.460709	0.457739	-1.1274	down
ko04640	Hematopoietic cell lineage	0.0667695	ENSRNOG00000020872	Cd5	K06455	NA	Cd5 molecule [Source:RGD Symbol;Acc:2309]	0.577905	0.540254	0.25983	0.0973373	0.177983	0.267674	2.53776	1.34356	up
ko04640	Hematopoietic cell lineage	0.0667695	MSTRG.27243	Cd3g	K06452	NA	CD3g molecule [Source:RGD Symbol;Acc:1307718]	3.1597	3.36923	1.43494	0.802837	0.611571	1.27998	2.95572	1.56351	up
ko00730	Thiamine metabolism	0.0691631	MSTRG.19371	Nfs1	K04487	EC:2.8.1.7	NFS1 cysteine desulfurase [Source:RGD Symbol;Acc:620912]	3.63526	0.0001	3.65634	0.0001	0.0001	0.0001	24305.7	14.569	up
ko05169	Epstein-Barr virus infection	0.0706315	ENSRNOG00000049282	Oas2	K14216	EC:2.7.7.84	2'-5' oligoadenylate synthetase 2 [Source:RGD Symbol;Acc:1359697]	1.13584	0.796252	0.431963	0.36197	0.392657	0.369048	2.10386	1.07304	up
ko05169	Epstein-Barr virus infection	0.0706315	MSTRG.27243	Cd3g	K06452	NA	CD3g molecule [Source:RGD Symbol;Acc:1307718]	3.1597	3.36923	1.43494	0.802837	0.611571	1.27998	2.95572	1.56351	up
ko05169	Epstein-Barr virus infection	0.0706315	MSTRG.3425	Irf7	K09447	NA	interferon regulatory factor 7 [Source:RGD Symbol;Acc:1307828]	3.76225	5.28163	2.92289	1.06032	1.17443	1.60451	3.11694	1.64013	up
ko04024	cAMP signaling pathway	0.0748281	ENSRNOG00000003972	Tshr	K04249	NA	thyroid stimulating hormone receptor [Source:RGD Symbol;Acc:3911]	0.489374	0.184589	0.289544	0.094947	0.190353	0.167872	2.12614	1.08824	up
ko04024	cAMP signaling pathway	0.0748281	ENSRNOG00000045816	Gria1	K05197	NA	glutamate ionotropic receptor AMPA type subunit 1 [Source:RGD Symbol;Acc:621531]	0.153662	0.0781212	0.0762892	0.328888	0.272742	0.303107	0.34051	-1.55423	down
ko04024	cAMP signaling pathway	0.0748281	MSTRG.1771	Tnni3	K19752	NA	dynein, axonemal, assembly factor 3 [Source:RGD Symbol;Acc:2323487];troponin I3, cardiac type [Source:RGD Symbol;Acc:62052]	0.232226	0.361112	0.142345	0.656005	0.490498	0.460709	0.457739	-1.1274	down
ko00564	Glycerophospholipid metabolism	0.0775468	ENSRNOG00000026764	Pla2g4c	K16342	EC:3.1.1.4	phospholipase A2 group IVC [Source:RGD Symbol;Acc:1594658]	0.486308	0.281544	0.148092	0.0390525	0.0591423	0.217515	2.90122	1.53666	up
ko00564	Glycerophospholipid metabolism	0.0775468	MSTRG.26667	Gpd1	K00006	EC:1.1.1.8	glycerol-3-phosphate dehydrogenase 1 [Source:RGD Symbol;Acc:621381]	2.5	0.764599	1.04927	0.560462	0.529418	0.458827	2.78547	1.47792	up
ko00900	Terpenoid backbone biosynthesis	0.0998232	MSTRG.16315	Hmgcs2	K01641	EC:2.3.3.10	3-hydroxy-3-methylglutaryl-CoA synthase 2 [Source:RGD Symbol;Acc:2804]	0.615012	0.301299	0.622912	0.289258	0.233091	0.131719	2.35331	1.23469	up
ko04724	Glutamatergic synapse	0.100584	ENSRNOG00000026764	Pla2g4c	K16342	EC:3.1.1.4	phospholipase A2 group IVC [Source:RGD Symbol;Acc:1594658]	0.486308	0.281544	0.148092	0.0390525	0.0591423	0.217515	2.90122	1.53666	up
ko04724	Glutamatergic synapse	0.100584	ENSRNOG00000045816	Gria1	K05197	NA	glutamate ionotropic receptor AMPA type subunit 1 [Source:RGD Symbol;Acc:621531]	0.153662	0.0781212	0.0762892	0.328888	0.272742	0.303107	0.34051	-1.55423	down
ko00592	alpha-Linolenic acid metabolism	0.104122	ENSRNOG00000026764	Pla2g4c	K16342	EC:3.1.1.4	phospholipase A2 group IVC [Source:RGD Symbol;Acc:1594658]	0.486308	0.281544	0.148092	0.0390525	0.0591423	0.217515	2.90122	1.53666	up
ko00650	Butanoate metabolism	0.11266	MSTRG.16315	Hmgcs2	K01641	EC:2.3.3.10	3-hydroxy-3-methylglutaryl-CoA synthase 2 [Source:RGD Symbol;Acc:2804]	0.615012	0.301299	0.622912	0.289258	0.233091	0.131719	2.35331	1.23469	up
ko04371	Apelin signaling pathway	0.138123	ENSRNOG00000015086	Plin1	K08768	NA	perilipin 1 [Source:RGD Symbol;Acc:3351]	0.58075	0.293959	0.488433	0.106797	0.123819	0.12879	3.79277	1.92325	up
ko04371	Apelin signaling pathway	0.138123	MSTRG.1268	Ccn2	K06827	NA	cellular communication network factor 2 [Source:RGD Symbol;Acc:621392]	97.162	163.002	90.2827	62.7941	47.5404	55.8168	2.1092	1.0767	up
ko04261	Adrenergic signaling in cardiomyocytes	0.144657	MSTRG.10649	Myh6	K17751	NA	myosin heavy chain 7 [Source:RGD Symbol;Acc:62030];myosin heavy chain 6 [Source:RGD Symbol;Acc:62029]	0.997238	1.06135	0.328905	1.69535	2.31046	1.00868	0.476118	-1.07061	down
ko04261	Adrenergic signaling in cardiomyocytes	0.144657	MSTRG.1771	Tnni3	K19752	NA	dynein, axonemal, assembly factor 3 [Source:RGD Symbol;Acc:2323487];troponin I3, cardiac type [Source:RGD Symbol;Acc:62052]	0.232226	0.361112	0.142345	0.656005	0.490498	0.460709	0.457739	-1.1274	down
ko04614	Renin-angiotensin system	0.150111	MSTRG.10688	Cma1	K01329	EC:3.4.21.39	chymase 1 [Source:RGD Symbol;Acc:2365]	4.6429	2.56201	3.59294	1.91197	1.46093	1.90488	2.04591	1.03274	up
ko04514	Cell adhesion molecules (CAMs)	0.151257	ENSRNOG00000001926	Cldn1	K06087	NA	claudin 1 [Source:RGD Symbol;Acc:68422]	0.488957	0.588734	0.237891	0.155539	0.268818	0.188699	2.14594	1.10161	up
ko04514	Cell adhesion molecules (CAMs)	0.151257	ENSRNOG00000047574	Nrxn3	K07377	NA	neurexin 3 [Source:RGD Symbol;Acc:620212]	0.0883774	0.0732327	0.039433	0.14112	0.283531	0.153337	0.347833	-1.52353	down
ko00591	Linoleic acid metabolism	0.162249	ENSRNOG00000026764	Pla2g4c	K16342	EC:3.1.1.4	phospholipase A2 group IVC [Source:RGD Symbol;Acc:1594658]	0.486308	0.281544	0.148092	0.0390525	0.0591423	0.217515	2.90122	1.53666	up
ko04010	MAPK signaling pathway	0.16455	ENSRNOG00000005008	Angpt4	K05467	NA	angiopoietin 4 [Source:RGD Symbol;Acc:1307539]	0.957383	0.605696	0.869505	0.442478	0.367232	0.262644	2.26845	1.18171	up
ko04010	MAPK signaling pathway	0.16455	ENSRNOG00000026764	Pla2g4c	K16342	EC:3.1.1.4	phospholipase A2 group IVC [Source:RGD Symbol;Acc:1594658]	0.486308	0.281544	0.148092	0.0390525	0.0591423	0.217515	2.90122	1.53666	up
ko04010	MAPK signaling pathway	0.16455	MSTRG.17011	Hspa1b	K03283	NA	heat shock protein family A (Hsp70) member 1B [Source:RGD Symbol;Acc:2840]	5.24329	5.52474	2.7742	7.21687	11.7813	14.7747	0.40098	-1.3184	down
ko04141	Protein processing in endoplasmic reticulum	0.178228	MSTRG.17011	Hspa1b	K03283	NA	heat shock protein family A (Hsp70) member 1B [Source:RGD Symbol;Acc:2840]	5.24329	5.52474	2.7742	7.21687	11.7813	14.7747	0.40098	-1.3184	down
ko04141	Protein processing in endoplasmic reticulum	0.178228	MSTRG.27342	Cryab	K09542	NA	crystallin, alpha B [Source:RGD Symbol;Acc:2414]	4.40167	3.16475	1.93664	6.6383	11.8965	6.47058	0.380041	-1.39577	down
ko04621	NOD-like receptor signaling pathway	0.17994	ENSRNOG00000049282	Oas2	K14216	EC:2.7.7.84	2'-5' oligoadenylate synthetase 2 [Source:RGD Symbol;Acc:1359697]	1.13584	0.796252	0.431963	0.36197	0.392657	0.369048	2.10386	1.07304	up
ko04621	NOD-like receptor signaling pathway	0.17994	MSTRG.3425	Irf7	K09447	NA	interferon regulatory factor 7 [Source:RGD Symbol;Acc:1307828]	3.76225	5.28163	2.92289	1.06032	1.17443	1.60451	3.11694	1.64013	up
ko05033	Nicotine addiction	0.182105	ENSRNOG00000045816	Gria1	K05197	NA	glutamate ionotropic receptor AMPA type subunit 1 [Source:RGD Symbol;Acc:621531]	0.153662	0.0781212	0.0762892	0.328888	0.272742	0.303107	0.34051	-1.55423	down
ko00565	Ether lipid metabolism	0.197659	ENSRNOG00000026764	Pla2g4c	K16342	EC:3.1.1.4	phospholipase A2 group IVC [Source:RGD Symbol;Acc:1594658]	0.486308	0.281544	0.148092	0.0390525	0.0591423	0.217515	2.90122	1.53666	up
ko05144	Malaria	0.201502	MSTRG.21375	Klrk1	K06728	NA	killer cell lectin like receptor K1 [Source:RGD Symbol;Acc:3180]	3.23628	1.16965	1.88792	0.905104	0.662451	1.16837	2.30045	1.20191	up
ko04930	Type II diabetes mellitus	0.201502	MSTRG.7077	Adipoq	K07296	NA	adiponectin, C1Q and collagen domain containing [Source:RGD Symbol;Acc:628748]	1.56388	0.891889	1.23395	0.20421	0.211193	0.290087	5.23001	2.38681	up
ko00380	Tryptophan metabolism	0.201502	ENSRNOG00000019500	Cyp1a1	K07408	EC:1.14.14.1	cytochrome P450, family 1, subfamily a, polypeptide 1 [Source:RGD Symbol;Acc:2458]	0.03592	0.0001	0.081544	0.280251	0.378238	0.727885	0.0847996	-3.5598	down
ko03050	Proteasome	0.201502	MSTRG.7427	LOC100911238	K11599	NA	proteasome maturation protein-like [Source:RGD Symbol;Acc:6494524]	1.59028	3.85381	0.293878	9.47432	3.8247	8.55791	0.262524	-1.92948	down
ko05320	Autoimmune thyroid disease	0.205328	ENSRNOG00000003972	Tshr	K04249	NA	thyroid stimulating hormone receptor [Source:RGD Symbol;Acc:3911]	0.489374	0.184589	0.289544	0.094947	0.190353	0.167872	2.12614	1.08824	up
ko05167	Kaposi sarcoma-associated herpesvirus infection	0.211158	ENSRNOG00000006736	Ccr3	K04178	NA	C-C motif chemokine receptor 3 [Source:RGD Symbol;Acc:620593]	0.539265	0.662872	0.240814	0.156602	0.179279	0.329123	2.16984	1.11759	up
ko05167	Kaposi sarcoma-associated herpesvirus infection	0.211158	MSTRG.3425	Irf7	K09447	NA	interferon regulatory factor 7 [Source:RGD Symbol;Acc:1307828]	3.76225	5.28163	2.92289	1.06032	1.17443	1.60451	3.11694	1.64013	up
ko00280	Valine, leucine and isoleucine degradation	0.220452	MSTRG.16315	Hmgcs2	K01641	EC:2.3.3.10	3-hydroxy-3-methylglutaryl-CoA synthase 2 [Source:RGD Symbol;Acc:2804]	0.615012	0.301299	0.622912	0.289258	0.233091	0.131719	2.35331	1.23469	up
ko04080	Neuroactive ligand-receptor interaction	0.224175	ENSRNOG00000000873	Brs3	K04170	NA	bombesin receptor subtype 3 [Source:RGD Symbol;Acc:628645]	0.684856	0.476728	0.325205	0.138879	0.100965	0.373652	2.42347	1.27707	up
ko04080	Neuroactive ligand-receptor interaction	0.224175	ENSRNOG00000003972	Tshr	K04249	NA	thyroid stimulating hormone receptor [Source:RGD Symbol;Acc:3911]	0.489374	0.184589	0.289544	0.094947	0.190353	0.167872	2.12614	1.08824	up
ko04080	Neuroactive ligand-receptor interaction	0.224175	ENSRNOG00000045816	Gria1	K05197	NA	glutamate ionotropic receptor AMPA type subunit 1 [Source:RGD Symbol;Acc:621531]	0.153662	0.0781212	0.0762892	0.328888	0.272742	0.303107	0.34051	-1.55423	down
ko04623	Cytosolic DNA-sensing pathway	0.224188	MSTRG.3425	Irf7	K09447	NA	interferon regulatory factor 7 [Source:RGD Symbol;Acc:1307828]	3.76225	5.28163	2.92289	1.06032	1.17443	1.60451	3.11694	1.64013	up
ko00980	Metabolism of xenobiotics by cytochrome P450	0.224188	ENSRNOG00000019500	Cyp1a1	K07408	EC:1.14.14.1	cytochrome P450, family 1, subfamily a, polypeptide 1 [Source:RGD Symbol;Acc:2458]	0.03592	0.0001	0.081544	0.280251	0.378238	0.727885	0.0847996	-3.5598	down
ko05134	Legionellosis	0.227908	MSTRG.17011	Hspa1b	K03283	NA	heat shock protein family A (Hsp70) member 1B [Source:RGD Symbol;Acc:2840]	5.24329	5.52474	2.7742	7.21687	11.7813	14.7747	0.40098	-1.3184	down
ko05014	Amyotrophic lateral sclerosis (ALS)	0.227908	ENSRNOG00000045816	Gria1	K05197	NA	glutamate ionotropic receptor AMPA type subunit 1 [Source:RGD Symbol;Acc:621531]	0.153662	0.0781212	0.0762892	0.328888	0.272742	0.303107	0.34051	-1.55423	down
ko04370	VEGF signaling pathway	0.238963	ENSRNOG00000026764	Pla2g4c	K16342	EC:3.1.1.4	phospholipase A2 group IVC [Source:RGD Symbol;Acc:1594658]	0.486308	0.281544	0.148092	0.0390525	0.0591423	0.217515	2.90122	1.53666	up
ko05203	Viral carcinogenesis	0.23937	ENSRNOG00000006736	Ccr3	K04178	NA	C-C motif chemokine receptor 3 [Source:RGD Symbol;Acc:620593]	0.539265	0.662872	0.240814	0.156602	0.179279	0.329123	2.16984	1.11759	up
ko05203	Viral carcinogenesis	0.23937	MSTRG.3425	Irf7	K09447	NA	interferon regulatory factor 7 [Source:RGD Symbol;Acc:1307828]	3.76225	5.28163	2.92289	1.06032	1.17443	1.60451	3.11694	1.64013	up
ko05321	Inflammatory bowel disease (IBD)	0.249863	MSTRG.29050	Il18rap	K05174	NA	interleukin 18 receptor accessory protein [Source:RGD Symbol;Acc:727867]	3.58786	2.45648	3.08283	1.61627	1.37962	1.35237	2.09904	1.06973	up
ko05416	Viral myocarditis	0.253463	MSTRG.10649	Myh6	K17751	NA	myosin heavy chain 7 [Source:RGD Symbol;Acc:62030];myosin heavy chain 6 [Source:RGD Symbol;Acc:62029]	0.997238	1.06135	0.328905	1.69535	2.31046	1.00868	0.476118	-1.07061	down
ko04720	Long-term potentiation	0.260612	ENSRNOG00000045816	Gria1	K05197	NA	glutamate ionotropic receptor AMPA type subunit 1 [Source:RGD Symbol;Acc:621531]	0.153662	0.0781212	0.0762892	0.328888	0.272742	0.303107	0.34051	-1.55423	down
ko00830	Retinol metabolism	0.260612	ENSRNOG00000019500	Cyp1a1	K07408	EC:1.14.14.1	cytochrome P450, family 1, subfamily a, polypeptide 1 [Source:RGD Symbol;Acc:2458]	0.03592	0.0001	0.081544	0.280251	0.378238	0.727885	0.0847996	-3.5598	down
ko05031	Amphetamine addiction	0.264161	ENSRNOG00000045816	Gria1	K05197	NA	glutamate ionotropic receptor AMPA type subunit 1 [Source:RGD Symbol;Acc:621531]	0.153662	0.0781212	0.0762892	0.328888	0.272742	0.303107	0.34051	-1.55423	down
ko00140	Steroid hormone biosynthesis	0.264161	ENSRNOG00000019500	Cyp1a1	K07408	EC:1.14.14.1	cytochrome P450, family 1, subfamily a, polypeptide 1 [Source:RGD Symbol;Acc:2458]	0.03592	0.0001	0.081544	0.280251	0.378238	0.727885	0.0847996	-3.5598	down
ko04622	RIG-I-like receptor signaling pathway	0.264161	MSTRG.3425	Irf7	K09447	NA	interferon regulatory factor 7 [Source:RGD Symbol;Acc:1307828]	3.76225	5.28163	2.92289	1.06032	1.17443	1.60451	3.11694	1.64013	up
ko04664	Fc epsilon RI signaling pathway	0.27471	ENSRNOG00000026764	Pla2g4c	K16342	EC:3.1.1.4	phospholipase A2 group IVC [Source:RGD Symbol;Acc:1594658]	0.486308	0.281544	0.148092	0.0390525	0.0591423	0.217515	2.90122	1.53666	up
ko04612	Antigen processing and presentation	0.27471	MSTRG.17011	Hspa1b	K03283	NA	heat shock protein family A (Hsp70) member 1B [Source:RGD Symbol;Acc:2840]	5.24329	5.52474	2.7742	7.21687	11.7813	14.7747	0.40098	-1.3184	down
ko05204	Chemical carcinogenesis	0.285111	ENSRNOG00000019500	Cyp1a1	K07408	EC:1.14.14.1	cytochrome P450, family 1, subfamily a, polypeptide 1 [Source:RGD Symbol;Acc:2458]	0.03592	0.0001	0.081544	0.280251	0.378238	0.727885	0.0847996	-3.5598	down
ko04920	Adipocytokine signaling pathway	0.285111	MSTRG.7077	Adipoq	K07296	NA	adiponectin, C1Q and collagen domain containing [Source:RGD Symbol;Acc:628748]	1.56388	0.891889	1.23395	0.20421	0.211193	0.290087	5.23001	2.38681	up
ko04918	Thyroid hormone synthesis	0.291965	ENSRNOG00000003972	Tshr	K04249	NA	thyroid stimulating hormone receptor [Source:RGD Symbol;Acc:3911]	0.489374	0.184589	0.289544	0.094947	0.190353	0.167872	2.12614	1.08824	up
ko04014	Ras signaling pathway	0.299826	ENSRNOG00000005008	Angpt4	K05467	NA	angiopoietin 4 [Source:RGD Symbol;Acc:1307539]	0.957383	0.605696	0.869505	0.442478	0.367232	0.262644	2.26845	1.18171	up
ko04014	Ras signaling pathway	0.299826	ENSRNOG00000026764	Pla2g4c	K16342	EC:3.1.1.4	phospholipase A2 group IVC [Source:RGD Symbol;Acc:1594658]	0.486308	0.281544	0.148092	0.0390525	0.0591423	0.217515	2.90122	1.53666	up
ko04714	Thermogenesis	0.305153	ENSRNOG00000015086	Plin1	K08768	NA	perilipin 1 [Source:RGD Symbol;Acc:3351]	0.58075	0.293959	0.488433	0.106797	0.123819	0.12879	3.79277	1.92325	up
ko04714	Thermogenesis	0.305153	MSTRG.25662	Frs2	K12461	NA	fibroblast growth factor receptor substrate 2 [Source:RGD Symbol;Acc:1308201]	1.85463	2.23289	2.7624	1.887	8.46212	8.22208	0.368846	-1.43891	down
ko00590	Arachidonic acid metabolism	0.30548	ENSRNOG00000026764	Pla2g4c	K16342	EC:3.1.1.4	phospholipase A2 group IVC [Source:RGD Symbol;Acc:1594658]	0.486308	0.281544	0.148092	0.0390525	0.0591423	0.217515	2.90122	1.53666	up
ko04512	ECM-receptor interaction	0.312144	MSTRG.28103	Col6a5	K06238	NA	collagen type VI alpha 5 chain [Source:RGD Symbol;Acc:1565804]	0.755555	1.13807	0.76111	2.0422	1.98002	1.51814	0.479162	-1.06141	down
ko04146	Peroxisome	0.331762	MSTRG.21596	Far2	K13356	EC:1.2.1.84	fatty acyl CoA reductase 2 [Source:RGD Symbol;Acc:1565966]	4.70552	2.47182	3.21356	1.81247	1.36236	1.33524	2.30393	1.2041	up
ko04211	Longevity regulating pathway	0.341366	MSTRG.7077	Adipoq	K07296	NA	adiponectin, C1Q and collagen domain containing [Source:RGD Symbol;Acc:628748]	1.56388	0.891889	1.23395	0.20421	0.211193	0.290087	5.23001	2.38681	up
ko04658	Th1 and Th2 cell differentiation	0.341366	MSTRG.27243	Cd3g	K06452	NA	CD3g molecule [Source:RGD Symbol;Acc:1307718]	3.1597	3.36923	1.43494	0.802837	0.611571	1.27998	2.95572	1.56351	up
ko04974	Protein digestion and absorption	0.350836	MSTRG.28103	Col6a5	K06238	NA	collagen type VI alpha 5 chain [Source:RGD Symbol;Acc:1565804]	0.755555	1.13807	0.76111	2.0422	1.98002	1.51814	0.479162	-1.06141	down
ko04912	GnRH signaling pathway	0.353962	ENSRNOG00000026764	Pla2g4c	K16342	EC:3.1.1.4	phospholipase A2 group IVC [Source:RGD Symbol;Acc:1594658]	0.486308	0.281544	0.148092	0.0390525	0.0591423	0.217515	2.90122	1.53666	up
ko04620	Toll-like receptor signaling pathway	0.357075	MSTRG.3425	Irf7	K09447	NA	interferon regulatory factor 7 [Source:RGD Symbol;Acc:1307828]	3.76225	5.28163	2.92289	1.06032	1.17443	1.60451	3.11694	1.64013	up
ko04060	Cytokine-cytokine receptor interaction	0.359704	ENSRNOG00000006736	Ccr3	K04178	NA	C-C motif chemokine receptor 3 [Source:RGD Symbol;Acc:620593]	0.539265	0.662872	0.240814	0.156602	0.179279	0.329123	2.16984	1.11759	up
ko04060	Cytokine-cytokine receptor interaction	0.359704	MSTRG.29050	Il18rap	K05174	NA	interleukin 18 receptor accessory protein [Source:RGD Symbol;Acc:727867]	3.58786	2.45648	3.08283	1.61627	1.37962	1.35237	2.09904	1.06973	up
ko04713	Circadian entrainment	0.369378	ENSRNOG00000045816	Gria1	K05197	NA	glutamate ionotropic receptor AMPA type subunit 1 [Source:RGD Symbol;Acc:621531]	0.153662	0.0781212	0.0762892	0.328888	0.272742	0.303107	0.34051	-1.55423	down
ko05231	Choline metabolism in cancer	0.369378	ENSRNOG00000026764	Pla2g4c	K16342	EC:3.1.1.4	phospholipase A2 group IVC [Source:RGD Symbol;Acc:1594658]	0.486308	0.281544	0.148092	0.0390525	0.0591423	0.217515	2.90122	1.53666	up
ko04066	HIF-1 signaling pathway	0.384436	ENSRNOG00000005008	Angpt4	K05467	NA	angiopoietin 4 [Source:RGD Symbol;Acc:1307539]	0.957383	0.605696	0.869505	0.442478	0.367232	0.262644	2.26845	1.18171	up
ko05142	Chagas disease (American trypanosomiasis)	0.387405	MSTRG.27243	Cd3g	K06452	NA	CD3g molecule [Source:RGD Symbol;Acc:1307718]	3.1597	3.36923	1.43494	0.802837	0.611571	1.27998	2.95572	1.56351	up
ko04660	T cell receptor signaling pathway	0.387405	MSTRG.27243	Cd3g	K06452	NA	CD3g molecule [Source:RGD Symbol;Acc:1307718]	3.1597	3.36923	1.43494	0.802837	0.611571	1.27998	2.95572	1.56351	up
ko04659	Th17 cell differentiation	0.393302	MSTRG.27243	Cd3g	K06452	NA	CD3g molecule [Source:RGD Symbol;Acc:1307718]	3.1597	3.36923	1.43494	0.802837	0.611571	1.27998	2.95572	1.56351	up
ko04650	Natural killer cell mediated cytotoxicity	0.40493	MSTRG.21375	Klrk1	K06728	NA	killer cell lectin like receptor K1 [Source:RGD Symbol;Acc:3180]	3.23628	1.16965	1.88792	0.905104	0.662451	1.16837	2.30045	1.20191	up
ko04750	Inflammatory mediator regulation of TRP channels	0.410662	ENSRNOG00000026764	Pla2g4c	K16342	EC:3.1.1.4	phospholipase A2 group IVC [Source:RGD Symbol;Acc:1594658]	0.486308	0.281544	0.148092	0.0390525	0.0591423	0.217515	2.90122	1.53666	up
ko04670	Leukocyte transendothelial migration	0.413508	ENSRNOG00000001926	Cldn1	K06087	NA	claudin 1 [Source:RGD Symbol;Acc:68422]	0.488957	0.588734	0.237891	0.155539	0.268818	0.188699	2.14594	1.10161	up
ko05145	Toxoplasmosis	0.416341	MSTRG.17011	Hspa1b	K03283	NA	heat shock protein family A (Hsp70) member 1B [Source:RGD Symbol;Acc:2840]	5.24329	5.52474	2.7742	7.21687	11.7813	14.7747	0.40098	-1.3184	down
ko04919	Thyroid hormone signaling pathway	0.421966	MSTRG.10649	Myh6	K17751	NA	myosin heavy chain 7 [Source:RGD Symbol;Acc:62030];myosin heavy chain 6 [Source:RGD Symbol;Acc:62029]	0.997238	1.06135	0.328905	1.69535	2.31046	1.00868	0.476118	-1.07061	down
ko04722	Neurotrophin signaling pathway	0.438527	MSTRG.25662	Frs2	K12461	NA	fibroblast growth factor receptor substrate 2 [Source:RGD Symbol;Acc:1308201]	1.85463	2.23289	2.7624	1.887	8.46212	8.22208	0.368846	-1.43891	down
ko05168	Herpes simplex virus 1 infection	0.441064	ENSRNOG00000049282	Oas2	K14216	EC:2.7.7.84	2'-5' oligoadenylate synthetase 2 [Source:RGD Symbol;Acc:1359697]	1.13584	0.796252	0.431963	0.36197	0.392657	0.369048	2.10386	1.07304	up
ko05168	Herpes simplex virus 1 infection	0.441064	MSTRG.3425	Irf7	K09447	NA	interferon regulatory factor 7 [Source:RGD Symbol;Acc:1307828]	3.76225	5.28163	2.92289	1.06032	1.17443	1.60451	3.11694	1.64013	up
ko04380	Osteoclast differentiation	0.441241	MSTRG.1662	Lilrc2	K06512	NA	leukocyte immunoglobulin-like receptor, subfamily C, member 2 [Source:RGD Symbol;Acc:1589872]	4.66489	2.19496	2.12359	1.18677	1.01506	2.26462	2.01132	1.00814	up
ko04726	Serotonergic synapse	0.443944	ENSRNOG00000026764	Pla2g4c	K16342	EC:3.1.1.4	phospholipase A2 group IVC [Source:RGD Symbol;Acc:1594658]	0.486308	0.281544	0.148092	0.0390525	0.0591423	0.217515	2.90122	1.53666	up
ko04152	AMPK signaling pathway	0.443944	MSTRG.7077	Adipoq	K07296	NA	adiponectin, C1Q and collagen domain containing [Source:RGD Symbol;Acc:628748]	1.56388	0.891889	1.23395	0.20421	0.211193	0.290087	5.23001	2.38681	up
ko04611	Platelet activation	0.451974	ENSRNOG00000026764	Pla2g4c	K16342	EC:3.1.1.4	phospholipase A2 group IVC [Source:RGD Symbol;Acc:1594658]	0.486308	0.281544	0.148092	0.0390525	0.0591423	0.217515	2.90122	1.53666	up
ko04728	Dopaminergic synapse	0.465107	ENSRNOG00000045816	Gria1	K05197	NA	glutamate ionotropic receptor AMPA type subunit 1 [Source:RGD Symbol;Acc:621531]	0.153662	0.0781212	0.0762892	0.328888	0.272742	0.303107	0.34051	-1.55423	down
ko04915	Estrogen signaling pathway	0.467696	MSTRG.17011	Hspa1b	K03283	NA	heat shock protein family A (Hsp70) member 1B [Source:RGD Symbol;Acc:2840]	5.24329	5.52474	2.7742	7.21687	11.7813	14.7747	0.40098	-1.3184	down
ko04270	Vascular smooth muscle contraction	0.470274	ENSRNOG00000026764	Pla2g4c	K16342	EC:3.1.1.4	phospholipase A2 group IVC [Source:RGD Symbol;Acc:1594658]	0.486308	0.281544	0.148092	0.0390525	0.0591423	0.217515	2.90122	1.53666	up
ko03040	Spliceosome	0.470274	MSTRG.17011	Hspa1b	K03283	NA	heat shock protein family A (Hsp70) member 1B [Source:RGD Symbol;Acc:2840]	5.24329	5.52474	2.7742	7.21687	11.7813	14.7747	0.40098	-1.3184	down
ko04151	PI3K-Akt signaling pathway	0.479744	ENSRNOG00000005008	Angpt4	K05467	NA	angiopoietin 4 [Source:RGD Symbol;Acc:1307539]	0.957383	0.605696	0.869505	0.442478	0.367232	0.262644	2.26845	1.18171	up
ko04151	PI3K-Akt signaling pathway	0.479744	MSTRG.28103	Col6a5	K06238	NA	collagen type VI alpha 5 chain [Source:RGD Symbol;Acc:1565804]	0.755555	1.13807	0.76111	2.0422	1.98002	1.51814	0.479162	-1.06141	down
ko04072	Phospholipase D signaling pathway	0.509897	ENSRNOG00000026764	Pla2g4c	K16342	EC:3.1.1.4	phospholipase A2 group IVC [Source:RGD Symbol;Acc:1594658]	0.486308	0.281544	0.148092	0.0390525	0.0591423	0.217515	2.90122	1.53666	up
ko04390	Hippo signaling pathway	0.516998	MSTRG.1268	Ccn2	K06827	NA	cellular communication network factor 2 [Source:RGD Symbol;Acc:621392]	97.162	163.002	90.2827	62.7941	47.5404	55.8168	2.1092	1.0767	up
ko04217	Necroptosis	0.521676	ENSRNOG00000026764	Pla2g4c	K16342	EC:3.1.1.4	phospholipase A2 group IVC [Source:RGD Symbol;Acc:1594658]	0.486308	0.281544	0.148092	0.0390525	0.0591423	0.217515	2.90122	1.53666	up
ko04921	Oxytocin signaling pathway	0.521676	ENSRNOG00000026764	Pla2g4c	K16342	EC:3.1.1.4	phospholipase A2 group IVC [Source:RGD Symbol;Acc:1594658]	0.486308	0.281544	0.148092	0.0390525	0.0591423	0.217515	2.90122	1.53666	up
ko04932	Non-alcoholic fatty liver disease (NAFLD)	0.52631	MSTRG.7077	Adipoq	K07296	NA	adiponectin, C1Q and collagen domain containing [Source:RGD Symbol;Acc:628748]	1.56388	0.891889	1.23395	0.20421	0.211193	0.290087	5.23001	2.38681	up
ko05161	Hepatitis B	0.528611	MSTRG.3425	Irf7	K09447	NA	interferon regulatory factor 7 [Source:RGD Symbol;Acc:1307828]	3.76225	5.28163	2.92289	1.06032	1.17443	1.60451	3.11694	1.64013	up
ko04723	Retrograde endocannabinoid signaling	0.528611	ENSRNOG00000045816	Gria1	K05197	NA	glutamate ionotropic receptor AMPA type subunit 1 [Source:RGD Symbol;Acc:621531]	0.153662	0.0781212	0.0762892	0.328888	0.272742	0.303107	0.34051	-1.55423	down
ko04530	Tight junction	0.535448	ENSRNOG00000001926	Cldn1	K06087	NA	claudin 1 [Source:RGD Symbol;Acc:68422]	0.488957	0.588734	0.237891	0.155539	0.268818	0.188699	2.14594	1.10161	up
ko04022	cGMP-PKG signaling pathway	0.551027	MSTRG.10649	Myh6	K17751	NA	myosin heavy chain 7 [Source:RGD Symbol;Acc:62030];myosin heavy chain 6 [Source:RGD Symbol;Acc:62029]	0.997238	1.06135	0.328905	1.69535	2.31046	1.00868	0.476118	-1.07061	down
ko04062	Chemokine signaling pathway	0.576559	ENSRNOG00000006736	Ccr3	K04178	NA	C-C motif chemokine receptor 3 [Source:RGD Symbol;Acc:620593]	0.539265	0.662872	0.240814	0.156602	0.179279	0.329123	2.16984	1.11759	up
ko05202	Transcriptional misregulation in cancer	0.584751	ENSRNOG00000005964	Nr4a3	K08559	NA	nuclear receptor subfamily 4, group A, member 3 [Source:RGD Symbol;Acc:61882]	0.829097	0.535612	0.350647	0.270902	0.310903	0.258833	2.04054	1.02895	up
ko04510	Focal adhesion	0.612226	MSTRG.28103	Col6a5	K06238	NA	collagen type VI alpha 5 chain [Source:RGD Symbol;Acc:1565804]	0.755555	1.13807	0.76111	2.0422	1.98002	1.51814	0.479162	-1.06141	down
ko05205	Proteoglycans in cancer	0.614119	MSTRG.25662	Frs2	K12461	NA	fibroblast growth factor receptor substrate 2 [Source:RGD Symbol;Acc:1308201]	1.85463	2.23289	2.7624	1.887	8.46212	8.22208	0.368846	-1.43891	down
ko04015	Rap1 signaling pathway	0.628945	ENSRNOG00000005008	Angpt4	K05467	NA	angiopoietin 4 [Source:RGD Symbol;Acc:1307539]	0.957383	0.605696	0.869505	0.442478	0.367232	0.262644	2.26845	1.18171	up
ko05170	Human immunodeficiency virus 1 infection	0.630759	MSTRG.27243	Cd3g	K06452	NA	CD3g molecule [Source:RGD Symbol;Acc:1307718]	3.1597	3.36923	1.43494	0.802837	0.611571	1.27998	2.95572	1.56351	up
ko05166	Human T-cell leukemia virus 1 infection	0.651861	MSTRG.27243	Cd3g	K06452	NA	CD3g molecule [Source:RGD Symbol;Acc:1307718]	3.1597	3.36923	1.43494	0.802837	0.611571	1.27998	2.95572	1.56351	up
ko05163	Human cytomegalovirus infection	0.658631	ENSRNOG00000006736	Ccr3	K04178	NA	C-C motif chemokine receptor 3 [Source:RGD Symbol;Acc:620593]	0.539265	0.662872	0.240814	0.156602	0.179279	0.329123	2.16984	1.11759	up
ko04144	Endocytosis	0.693635	MSTRG.17011	Hspa1b	K03283	NA	heat shock protein family A (Hsp70) member 1B [Source:RGD Symbol;Acc:2840]	5.24329	5.52474	2.7742	7.21687	11.7813	14.7747	0.40098	-1.3184	down
ko05165	Human papillomavirus infection	0.791756	MSTRG.28103	Col6a5	K06238	NA	collagen type VI alpha 5 chain [Source:RGD Symbol;Acc:1565804]	0.755555	1.13807	0.76111	2.0422	1.98002	1.51814	0.479162	-1.06141	down
