# Supplementary material for: Whole-transcriptome sequencing and ceRNA interaction network of temporomandibular joint osteoarthritis
Source: Front Genet. 2022 Oct 5;13:962574. doi: 10.3389/fgene.2022.962574 (PMC9581126; doi:10.3389/fgene.2022.962574)
Supplement: Supplementary file 2 [file Table3.XLSX]

## Sheet: Sheet1
RNA_class	RNA	miRNA	mRNA
lncRNA	.:MSTRG.15267.1	bta-miR-2478_L-1_1ss2TC	Azin1:ENSRNOT00000007999
lncRNA	.:MSTRG.23594.1	bta-miR-2478_L-1_1ss2TC	Azin1:ENSRNOT00000007999
lncRNA	.:MSTRG.26886.1	bta-miR-2478_L-1_1ss2TC	Azin1:ENSRNOT00000007999
lncRNA	.:MSTRG.28897.2	bta-miR-2478_L-1_1ss2TC	Azin1:ENSRNOT00000007999
lncRNA	.:MSTRG.5260.1	bta-miR-2478_L-1_1ss2TC	Azin1:ENSRNOT00000007999
lncRNA	AABR07009428:MSTRG.15407.7	bta-miR-2478_L-1_1ss2TC	Azin1:ENSRNOT00000007999
lncRNA	AC134224:ENSRNOT00000093096	bta-miR-2478_L-1_1ss2TC	Azin1:ENSRNOT00000007999
lncRNA	Chtop:MSTRG.16142.1	bta-miR-2478_L-1_1ss2TC	Azin1:ENSRNOT00000007999
lncRNA	Col13a1:MSTRG.17444.1	bta-miR-2478_L-1_1ss2TC	Azin1:ENSRNOT00000007999
lncRNA	Cox7a1:MSTRG.2214.2	bta-miR-2478_L-1_1ss2TC	Azin1:ENSRNOT00000007999
lncRNA	Ebf1:MSTRG.4748.1	bta-miR-2478_L-1_1ss2TC	Azin1:ENSRNOT00000007999
lncRNA	Ebf1:MSTRG.4748.3	bta-miR-2478_L-1_1ss2TC	Azin1:ENSRNOT00000007999
lncRNA	Eif4g3:MSTRG.23196.1	bta-miR-2478_L-1_1ss2TC	Azin1:ENSRNOT00000007999
lncRNA	Ighm:MSTRG.24844.5	bta-miR-2478_L-1_1ss2TC	Azin1:ENSRNOT00000007999
lncRNA	LOC100910854:ENSRNOT00000083218	bta-miR-2478_L-1_1ss2TC	Azin1:ENSRNOT00000007999
lncRNA	LOC680227:MSTRG.580.2	bta-miR-2478_L-1_1ss2TC	Azin1:ENSRNOT00000007999
lncRNA	LOC689840:MSTRG.26880.1	bta-miR-2478_L-1_1ss2TC	Azin1:ENSRNOT00000007999
lncRNA	Mark2:MSTRG.3719.1	bta-miR-2478_L-1_1ss2TC	Azin1:ENSRNOT00000007999
lncRNA	Pde6d:MSTRG.29521.2	bta-miR-2478_L-1_1ss2TC	Azin1:ENSRNOT00000007999
lncRNA	Pip4p2:MSTRG.21869.3	bta-miR-2478_L-1_1ss2TC	Azin1:ENSRNOT00000007999
lncRNA	Tab2:MSTRG.1063.2	bta-miR-2478_L-1_1ss2TC	Azin1:ENSRNOT00000007999
lncRNA	Ttc28:MSTRG.8169.2	bta-miR-2478_L-1_1ss2TC	Azin1:ENSRNOT00000007999
circRNA	circRNA1488	bta-miR-2478_L-1_1ss2TC	Azin1:ENSRNOT00000007999
circRNA	circRNA1571	bta-miR-2478_L-1_1ss2TC	Azin1:ENSRNOT00000007999
circRNA	circRNA1578	bta-miR-2478_L-1_1ss2TC	Azin1:ENSRNOT00000007999
circRNA	circRNA4510	bta-miR-2478_L-1_1ss2TC	Azin1:ENSRNOT00000007999
circRNA	circRNA4520	bta-miR-2478_L-1_1ss2TC	Azin1:ENSRNOT00000007999
lncRNA	.:MSTRG.15267.1	bta-miR-2478_L-1_1ss2TC	Dnmt3a:ENSRNOT00000047210
lncRNA	.:MSTRG.23594.1	bta-miR-2478_L-1_1ss2TC	Dnmt3a:ENSRNOT00000047210
lncRNA	.:MSTRG.26886.1	bta-miR-2478_L-1_1ss2TC	Dnmt3a:ENSRNOT00000047210
lncRNA	.:MSTRG.28897.2	bta-miR-2478_L-1_1ss2TC	Dnmt3a:ENSRNOT00000047210
lncRNA	.:MSTRG.5260.1	bta-miR-2478_L-1_1ss2TC	Dnmt3a:ENSRNOT00000047210
lncRNA	AABR07009428:MSTRG.15407.7	bta-miR-2478_L-1_1ss2TC	Dnmt3a:ENSRNOT00000047210
lncRNA	AC134224:ENSRNOT00000093096	bta-miR-2478_L-1_1ss2TC	Dnmt3a:ENSRNOT00000047210
lncRNA	Chtop:MSTRG.16142.1	bta-miR-2478_L-1_1ss2TC	Dnmt3a:ENSRNOT00000047210
lncRNA	Col13a1:MSTRG.17444.1	bta-miR-2478_L-1_1ss2TC	Dnmt3a:ENSRNOT00000047210
lncRNA	Cox7a1:MSTRG.2214.2	bta-miR-2478_L-1_1ss2TC	Dnmt3a:ENSRNOT00000047210
lncRNA	Ebf1:MSTRG.4748.1	bta-miR-2478_L-1_1ss2TC	Dnmt3a:ENSRNOT00000047210
lncRNA	Ebf1:MSTRG.4748.3	bta-miR-2478_L-1_1ss2TC	Dnmt3a:ENSRNOT00000047210
lncRNA	Eif4g3:MSTRG.23196.1	bta-miR-2478_L-1_1ss2TC	Dnmt3a:ENSRNOT00000047210
lncRNA	Ighm:MSTRG.24844.5	bta-miR-2478_L-1_1ss2TC	Dnmt3a:ENSRNOT00000047210
lncRNA	LOC100910854:ENSRNOT00000083218	bta-miR-2478_L-1_1ss2TC	Dnmt3a:ENSRNOT00000047210
lncRNA	LOC680227:MSTRG.580.2	bta-miR-2478_L-1_1ss2TC	Dnmt3a:ENSRNOT00000047210
lncRNA	LOC689840:MSTRG.26880.1	bta-miR-2478_L-1_1ss2TC	Dnmt3a:ENSRNOT00000047210
lncRNA	Mark2:MSTRG.3719.1	bta-miR-2478_L-1_1ss2TC	Dnmt3a:ENSRNOT00000047210
lncRNA	Pde6d:MSTRG.29521.2	bta-miR-2478_L-1_1ss2TC	Dnmt3a:ENSRNOT00000047210
lncRNA	Pip4p2:MSTRG.21869.3	bta-miR-2478_L-1_1ss2TC	Dnmt3a:ENSRNOT00000047210
lncRNA	Tab2:MSTRG.1063.2	bta-miR-2478_L-1_1ss2TC	Dnmt3a:ENSRNOT00000047210
lncRNA	Ttc28:MSTRG.8169.2	bta-miR-2478_L-1_1ss2TC	Dnmt3a:ENSRNOT00000047210
circRNA	circRNA1488	bta-miR-2478_L-1_1ss2TC	Dnmt3a:ENSRNOT00000047210
circRNA	circRNA1571	bta-miR-2478_L-1_1ss2TC	Dnmt3a:ENSRNOT00000047210
circRNA	circRNA1578	bta-miR-2478_L-1_1ss2TC	Dnmt3a:ENSRNOT00000047210
circRNA	circRNA4510	bta-miR-2478_L-1_1ss2TC	Dnmt3a:ENSRNOT00000047210
circRNA	circRNA4520	bta-miR-2478_L-1_1ss2TC	Dnmt3a:ENSRNOT00000047210
lncRNA	.:MSTRG.15267.1	bta-miR-2478_L-1_1ss2TC	Eif3j:ENSRNOT00000022437
lncRNA	.:MSTRG.23594.1	bta-miR-2478_L-1_1ss2TC	Eif3j:ENSRNOT00000022437
lncRNA	.:MSTRG.26886.1	bta-miR-2478_L-1_1ss2TC	Eif3j:ENSRNOT00000022437
lncRNA	.:MSTRG.28897.2	bta-miR-2478_L-1_1ss2TC	Eif3j:ENSRNOT00000022437
lncRNA	.:MSTRG.5260.1	bta-miR-2478_L-1_1ss2TC	Eif3j:ENSRNOT00000022437
lncRNA	AABR07009428:MSTRG.15407.7	bta-miR-2478_L-1_1ss2TC	Eif3j:ENSRNOT00000022437
lncRNA	AC134224:ENSRNOT00000093096	bta-miR-2478_L-1_1ss2TC	Eif3j:ENSRNOT00000022437
lncRNA	Chtop:MSTRG.16142.1	bta-miR-2478_L-1_1ss2TC	Eif3j:ENSRNOT00000022437
lncRNA	Col13a1:MSTRG.17444.1	bta-miR-2478_L-1_1ss2TC	Eif3j:ENSRNOT00000022437
lncRNA	Cox7a1:MSTRG.2214.2	bta-miR-2478_L-1_1ss2TC	Eif3j:ENSRNOT00000022437
lncRNA	Ebf1:MSTRG.4748.1	bta-miR-2478_L-1_1ss2TC	Eif3j:ENSRNOT00000022437
lncRNA	Ebf1:MSTRG.4748.3	bta-miR-2478_L-1_1ss2TC	Eif3j:ENSRNOT00000022437
lncRNA	Eif4g3:MSTRG.23196.1	bta-miR-2478_L-1_1ss2TC	Eif3j:ENSRNOT00000022437
lncRNA	Ighm:MSTRG.24844.5	bta-miR-2478_L-1_1ss2TC	Eif3j:ENSRNOT00000022437
lncRNA	LOC100910854:ENSRNOT00000083218	bta-miR-2478_L-1_1ss2TC	Eif3j:ENSRNOT00000022437
lncRNA	LOC680227:MSTRG.580.2	bta-miR-2478_L-1_1ss2TC	Eif3j:ENSRNOT00000022437
lncRNA	LOC689840:MSTRG.26880.1	bta-miR-2478_L-1_1ss2TC	Eif3j:ENSRNOT00000022437
lncRNA	Mark2:MSTRG.3719.1	bta-miR-2478_L-1_1ss2TC	Eif3j:ENSRNOT00000022437
lncRNA	Pde6d:MSTRG.29521.2	bta-miR-2478_L-1_1ss2TC	Eif3j:ENSRNOT00000022437
lncRNA	Pip4p2:MSTRG.21869.3	bta-miR-2478_L-1_1ss2TC	Eif3j:ENSRNOT00000022437
lncRNA	Tab2:MSTRG.1063.2	bta-miR-2478_L-1_1ss2TC	Eif3j:ENSRNOT00000022437
lncRNA	Ttc28:MSTRG.8169.2	bta-miR-2478_L-1_1ss2TC	Eif3j:ENSRNOT00000022437
circRNA	circRNA1488	bta-miR-2478_L-1_1ss2TC	Eif3j:ENSRNOT00000022437
circRNA	circRNA1571	bta-miR-2478_L-1_1ss2TC	Eif3j:ENSRNOT00000022437
circRNA	circRNA1578	bta-miR-2478_L-1_1ss2TC	Eif3j:ENSRNOT00000022437
circRNA	circRNA4510	bta-miR-2478_L-1_1ss2TC	Eif3j:ENSRNOT00000022437
circRNA	circRNA4520	bta-miR-2478_L-1_1ss2TC	Eif3j:ENSRNOT00000022437
lncRNA	.:MSTRG.15267.1	bta-miR-2478_L-1_1ss2TC	Kif16b:ENSRNOT00000036273
lncRNA	.:MSTRG.23594.1	bta-miR-2478_L-1_1ss2TC	Kif16b:ENSRNOT00000036273
lncRNA	.:MSTRG.26886.1	bta-miR-2478_L-1_1ss2TC	Kif16b:ENSRNOT00000036273
lncRNA	.:MSTRG.28897.2	bta-miR-2478_L-1_1ss2TC	Kif16b:ENSRNOT00000036273
lncRNA	.:MSTRG.5260.1	bta-miR-2478_L-1_1ss2TC	Kif16b:ENSRNOT00000036273
lncRNA	AABR07009428:MSTRG.15407.7	bta-miR-2478_L-1_1ss2TC	Kif16b:ENSRNOT00000036273
lncRNA	AC134224:ENSRNOT00000093096	bta-miR-2478_L-1_1ss2TC	Kif16b:ENSRNOT00000036273
lncRNA	Chtop:MSTRG.16142.1	bta-miR-2478_L-1_1ss2TC	Kif16b:ENSRNOT00000036273
lncRNA	Col13a1:MSTRG.17444.1	bta-miR-2478_L-1_1ss2TC	Kif16b:ENSRNOT00000036273
lncRNA	Cox7a1:MSTRG.2214.2	bta-miR-2478_L-1_1ss2TC	Kif16b:ENSRNOT00000036273
lncRNA	Ebf1:MSTRG.4748.1	bta-miR-2478_L-1_1ss2TC	Kif16b:ENSRNOT00000036273
lncRNA	Ebf1:MSTRG.4748.3	bta-miR-2478_L-1_1ss2TC	Kif16b:ENSRNOT00000036273
lncRNA	Eif4g3:MSTRG.23196.1	bta-miR-2478_L-1_1ss2TC	Kif16b:ENSRNOT00000036273
lncRNA	Ighm:MSTRG.24844.5	bta-miR-2478_L-1_1ss2TC	Kif16b:ENSRNOT00000036273
lncRNA	LOC100910854:ENSRNOT00000083218	bta-miR-2478_L-1_1ss2TC	Kif16b:ENSRNOT00000036273
lncRNA	LOC680227:MSTRG.580.2	bta-miR-2478_L-1_1ss2TC	Kif16b:ENSRNOT00000036273
lncRNA	LOC689840:MSTRG.26880.1	bta-miR-2478_L-1_1ss2TC	Kif16b:ENSRNOT00000036273
lncRNA	Mark2:MSTRG.3719.1	bta-miR-2478_L-1_1ss2TC	Kif16b:ENSRNOT00000036273
lncRNA	Pde6d:MSTRG.29521.2	bta-miR-2478_L-1_1ss2TC	Kif16b:ENSRNOT00000036273
lncRNA	Pip4p2:MSTRG.21869.3	bta-miR-2478_L-1_1ss2TC	Kif16b:ENSRNOT00000036273
lncRNA	Tab2:MSTRG.1063.2	bta-miR-2478_L-1_1ss2TC	Kif16b:ENSRNOT00000036273
lncRNA	Ttc28:MSTRG.8169.2	bta-miR-2478_L-1_1ss2TC	Kif16b:ENSRNOT00000036273
circRNA	circRNA1488	bta-miR-2478_L-1_1ss2TC	Kif16b:ENSRNOT00000036273
circRNA	circRNA1571	bta-miR-2478_L-1_1ss2TC	Kif16b:ENSRNOT00000036273
circRNA	circRNA1578	bta-miR-2478_L-1_1ss2TC	Kif16b:ENSRNOT00000036273
circRNA	circRNA4510	bta-miR-2478_L-1_1ss2TC	Kif16b:ENSRNOT00000036273
circRNA	circRNA4520	bta-miR-2478_L-1_1ss2TC	Kif16b:ENSRNOT00000036273
lncRNA	.:MSTRG.15267.1	bta-miR-2478_L-1_1ss2TC	Kif1c:ENSRNOT00000041493
lncRNA	.:MSTRG.23594.1	bta-miR-2478_L-1_1ss2TC	Kif1c:ENSRNOT00000041493
lncRNA	.:MSTRG.26886.1	bta-miR-2478_L-1_1ss2TC	Kif1c:ENSRNOT00000041493
lncRNA	.:MSTRG.28897.2	bta-miR-2478_L-1_1ss2TC	Kif1c:ENSRNOT00000041493
lncRNA	.:MSTRG.5260.1	bta-miR-2478_L-1_1ss2TC	Kif1c:ENSRNOT00000041493
lncRNA	AABR07009428:MSTRG.15407.7	bta-miR-2478_L-1_1ss2TC	Kif1c:ENSRNOT00000041493
lncRNA	AC134224:ENSRNOT00000093096	bta-miR-2478_L-1_1ss2TC	Kif1c:ENSRNOT00000041493
lncRNA	Chtop:MSTRG.16142.1	bta-miR-2478_L-1_1ss2TC	Kif1c:ENSRNOT00000041493
lncRNA	Col13a1:MSTRG.17444.1	bta-miR-2478_L-1_1ss2TC	Kif1c:ENSRNOT00000041493
lncRNA	Cox7a1:MSTRG.2214.2	bta-miR-2478_L-1_1ss2TC	Kif1c:ENSRNOT00000041493
lncRNA	Ebf1:MSTRG.4748.1	bta-miR-2478_L-1_1ss2TC	Kif1c:ENSRNOT00000041493
lncRNA	Ebf1:MSTRG.4748.3	bta-miR-2478_L-1_1ss2TC	Kif1c:ENSRNOT00000041493
lncRNA	Eif4g3:MSTRG.23196.1	bta-miR-2478_L-1_1ss2TC	Kif1c:ENSRNOT00000041493
lncRNA	Ighm:MSTRG.24844.5	bta-miR-2478_L-1_1ss2TC	Kif1c:ENSRNOT00000041493
lncRNA	LOC100910854:ENSRNOT00000083218	bta-miR-2478_L-1_1ss2TC	Kif1c:ENSRNOT00000041493
lncRNA	LOC680227:MSTRG.580.2	bta-miR-2478_L-1_1ss2TC	Kif1c:ENSRNOT00000041493
lncRNA	LOC689840:MSTRG.26880.1	bta-miR-2478_L-1_1ss2TC	Kif1c:ENSRNOT00000041493
lncRNA	Mark2:MSTRG.3719.1	bta-miR-2478_L-1_1ss2TC	Kif1c:ENSRNOT00000041493
lncRNA	Pde6d:MSTRG.29521.2	bta-miR-2478_L-1_1ss2TC	Kif1c:ENSRNOT00000041493
lncRNA	Pip4p2:MSTRG.21869.3	bta-miR-2478_L-1_1ss2TC	Kif1c:ENSRNOT00000041493
lncRNA	Tab2:MSTRG.1063.2	bta-miR-2478_L-1_1ss2TC	Kif1c:ENSRNOT00000041493
lncRNA	Ttc28:MSTRG.8169.2	bta-miR-2478_L-1_1ss2TC	Kif1c:ENSRNOT00000041493
circRNA	circRNA1488	bta-miR-2478_L-1_1ss2TC	Kif1c:ENSRNOT00000041493
circRNA	circRNA1571	bta-miR-2478_L-1_1ss2TC	Kif1c:ENSRNOT00000041493
circRNA	circRNA1578	bta-miR-2478_L-1_1ss2TC	Kif1c:ENSRNOT00000041493
circRNA	circRNA4510	bta-miR-2478_L-1_1ss2TC	Kif1c:ENSRNOT00000041493
circRNA	circRNA4520	bta-miR-2478_L-1_1ss2TC	Kif1c:ENSRNOT00000041493
lncRNA	.:MSTRG.15267.1	bta-miR-2478_L-1_1ss2TC	Map2:ENSRNOT00000092445
lncRNA	.:MSTRG.23594.1	bta-miR-2478_L-1_1ss2TC	Map2:ENSRNOT00000092445
lncRNA	.:MSTRG.26886.1	bta-miR-2478_L-1_1ss2TC	Map2:ENSRNOT00000092445
lncRNA	.:MSTRG.28897.2	bta-miR-2478_L-1_1ss2TC	Map2:ENSRNOT00000092445
lncRNA	.:MSTRG.5260.1	bta-miR-2478_L-1_1ss2TC	Map2:ENSRNOT00000092445
lncRNA	AABR07009428:MSTRG.15407.7	bta-miR-2478_L-1_1ss2TC	Map2:ENSRNOT00000092445
lncRNA	AC134224:ENSRNOT00000093096	bta-miR-2478_L-1_1ss2TC	Map2:ENSRNOT00000092445
lncRNA	Chtop:MSTRG.16142.1	bta-miR-2478_L-1_1ss2TC	Map2:ENSRNOT00000092445
lncRNA	Col13a1:MSTRG.17444.1	bta-miR-2478_L-1_1ss2TC	Map2:ENSRNOT00000092445
lncRNA	Cox7a1:MSTRG.2214.2	bta-miR-2478_L-1_1ss2TC	Map2:ENSRNOT00000092445
lncRNA	Ebf1:MSTRG.4748.1	bta-miR-2478_L-1_1ss2TC	Map2:ENSRNOT00000092445
lncRNA	Ebf1:MSTRG.4748.3	bta-miR-2478_L-1_1ss2TC	Map2:ENSRNOT00000092445
lncRNA	Eif4g3:MSTRG.23196.1	bta-miR-2478_L-1_1ss2TC	Map2:ENSRNOT00000092445
lncRNA	Ighm:MSTRG.24844.5	bta-miR-2478_L-1_1ss2TC	Map2:ENSRNOT00000092445
lncRNA	LOC100910854:ENSRNOT00000083218	bta-miR-2478_L-1_1ss2TC	Map2:ENSRNOT00000092445
lncRNA	LOC680227:MSTRG.580.2	bta-miR-2478_L-1_1ss2TC	Map2:ENSRNOT00000092445
lncRNA	LOC689840:MSTRG.26880.1	bta-miR-2478_L-1_1ss2TC	Map2:ENSRNOT00000092445
lncRNA	Mark2:MSTRG.3719.1	bta-miR-2478_L-1_1ss2TC	Map2:ENSRNOT00000092445
lncRNA	Pde6d:MSTRG.29521.2	bta-miR-2478_L-1_1ss2TC	Map2:ENSRNOT00000092445
lncRNA	Pip4p2:MSTRG.21869.3	bta-miR-2478_L-1_1ss2TC	Map2:ENSRNOT00000092445
lncRNA	Tab2:MSTRG.1063.2	bta-miR-2478_L-1_1ss2TC	Map2:ENSRNOT00000092445
lncRNA	Ttc28:MSTRG.8169.2	bta-miR-2478_L-1_1ss2TC	Map2:ENSRNOT00000092445
circRNA	circRNA1488	bta-miR-2478_L-1_1ss2TC	Map2:ENSRNOT00000092445
circRNA	circRNA1571	bta-miR-2478_L-1_1ss2TC	Map2:ENSRNOT00000092445
circRNA	circRNA1578	bta-miR-2478_L-1_1ss2TC	Map2:ENSRNOT00000092445
circRNA	circRNA4510	bta-miR-2478_L-1_1ss2TC	Map2:ENSRNOT00000092445
circRNA	circRNA4520	bta-miR-2478_L-1_1ss2TC	Map2:ENSRNOT00000092445
lncRNA	.:MSTRG.15267.1	bta-miR-2478_L-1_1ss2TC	Steap2:ENSRNOT00000007977
lncRNA	.:MSTRG.23594.1	bta-miR-2478_L-1_1ss2TC	Steap2:ENSRNOT00000007977
lncRNA	.:MSTRG.26886.1	bta-miR-2478_L-1_1ss2TC	Steap2:ENSRNOT00000007977
lncRNA	.:MSTRG.28897.2	bta-miR-2478_L-1_1ss2TC	Steap2:ENSRNOT00000007977
lncRNA	.:MSTRG.5260.1	bta-miR-2478_L-1_1ss2TC	Steap2:ENSRNOT00000007977
lncRNA	AABR07009428:MSTRG.15407.7	bta-miR-2478_L-1_1ss2TC	Steap2:ENSRNOT00000007977
lncRNA	AC134224:ENSRNOT00000093096	bta-miR-2478_L-1_1ss2TC	Steap2:ENSRNOT00000007977
lncRNA	Chtop:MSTRG.16142.1	bta-miR-2478_L-1_1ss2TC	Steap2:ENSRNOT00000007977
lncRNA	Col13a1:MSTRG.17444.1	bta-miR-2478_L-1_1ss2TC	Steap2:ENSRNOT00000007977
lncRNA	Cox7a1:MSTRG.2214.2	bta-miR-2478_L-1_1ss2TC	Steap2:ENSRNOT00000007977
lncRNA	Ebf1:MSTRG.4748.1	bta-miR-2478_L-1_1ss2TC	Steap2:ENSRNOT00000007977
lncRNA	Ebf1:MSTRG.4748.3	bta-miR-2478_L-1_1ss2TC	Steap2:ENSRNOT00000007977
lncRNA	Eif4g3:MSTRG.23196.1	bta-miR-2478_L-1_1ss2TC	Steap2:ENSRNOT00000007977
lncRNA	Ighm:MSTRG.24844.5	bta-miR-2478_L-1_1ss2TC	Steap2:ENSRNOT00000007977
lncRNA	LOC100910854:ENSRNOT00000083218	bta-miR-2478_L-1_1ss2TC	Steap2:ENSRNOT00000007977
lncRNA	LOC680227:MSTRG.580.2	bta-miR-2478_L-1_1ss2TC	Steap2:ENSRNOT00000007977
lncRNA	LOC689840:MSTRG.26880.1	bta-miR-2478_L-1_1ss2TC	Steap2:ENSRNOT00000007977
lncRNA	Mark2:MSTRG.3719.1	bta-miR-2478_L-1_1ss2TC	Steap2:ENSRNOT00000007977
lncRNA	Pde6d:MSTRG.29521.2	bta-miR-2478_L-1_1ss2TC	Steap2:ENSRNOT00000007977
lncRNA	Pip4p2:MSTRG.21869.3	bta-miR-2478_L-1_1ss2TC	Steap2:ENSRNOT00000007977
lncRNA	Tab2:MSTRG.1063.2	bta-miR-2478_L-1_1ss2TC	Steap2:ENSRNOT00000007977
lncRNA	Ttc28:MSTRG.8169.2	bta-miR-2478_L-1_1ss2TC	Steap2:ENSRNOT00000007977
circRNA	circRNA1488	bta-miR-2478_L-1_1ss2TC	Steap2:ENSRNOT00000007977
circRNA	circRNA1571	bta-miR-2478_L-1_1ss2TC	Steap2:ENSRNOT00000007977
circRNA	circRNA1578	bta-miR-2478_L-1_1ss2TC	Steap2:ENSRNOT00000007977
circRNA	circRNA4510	bta-miR-2478_L-1_1ss2TC	Steap2:ENSRNOT00000007977
circRNA	circRNA4520	bta-miR-2478_L-1_1ss2TC	Steap2:ENSRNOT00000007977
lncRNA	.:MSTRG.14147.1	bta-miR-2478_L-2	Anks1a:ENSRNOT00000081604
lncRNA	.:MSTRG.15267.1	bta-miR-2478_L-2	Anks1a:ENSRNOT00000081604
lncRNA	.:MSTRG.218.2	bta-miR-2478_L-2	Anks1a:ENSRNOT00000081604
lncRNA	.:MSTRG.22402.4	bta-miR-2478_L-2	Anks1a:ENSRNOT00000081604
lncRNA	.:MSTRG.23375.1	bta-miR-2478_L-2	Anks1a:ENSRNOT00000081604
lncRNA	.:MSTRG.28897.2	bta-miR-2478_L-2	Anks1a:ENSRNOT00000081604
lncRNA	.:MSTRG.5260.1	bta-miR-2478_L-2	Anks1a:ENSRNOT00000081604
lncRNA	.:MSTRG.9706.2	bta-miR-2478_L-2	Anks1a:ENSRNOT00000081604
lncRNA	AABR07009428:MSTRG.15407.7	bta-miR-2478_L-2	Anks1a:ENSRNOT00000081604
lncRNA	AC134224:ENSRNOT00000093096	bta-miR-2478_L-2	Anks1a:ENSRNOT00000081604
lncRNA	Bend4:MSTRG.9559.3	bta-miR-2478_L-2	Anks1a:ENSRNOT00000081604
lncRNA	Cdv3:MSTRG.28073.1	bta-miR-2478_L-2	Anks1a:ENSRNOT00000081604
lncRNA	Chtop:MSTRG.16142.1	bta-miR-2478_L-2	Anks1a:ENSRNOT00000081604
lncRNA	Clint1:MSTRG.4783.3	bta-miR-2478_L-2	Anks1a:ENSRNOT00000081604
lncRNA	Cox7a1:MSTRG.2214.2	bta-miR-2478_L-2	Anks1a:ENSRNOT00000081604
lncRNA	Crebbp:MSTRG.4516.5	bta-miR-2478_L-2	Anks1a:ENSRNOT00000081604
lncRNA	Ebf1:MSTRG.4748.3	bta-miR-2478_L-2	Anks1a:ENSRNOT00000081604
lncRNA	Kcnk12:MSTRG.23640.1	bta-miR-2478_L-2	Anks1a:ENSRNOT00000081604
lncRNA	Kcnk12:MSTRG.23640.3	bta-miR-2478_L-2	Anks1a:ENSRNOT00000081604
lncRNA	LOC689840:MSTRG.26880.1	bta-miR-2478_L-2	Anks1a:ENSRNOT00000081604
lncRNA	Mef2c:MSTRG.14762.2	bta-miR-2478_L-2	Anks1a:ENSRNOT00000081604
lncRNA	Pde6d:MSTRG.29521.2	bta-miR-2478_L-2	Anks1a:ENSRNOT00000081604
lncRNA	Pip4p2:MSTRG.21869.3	bta-miR-2478_L-2	Anks1a:ENSRNOT00000081604
lncRNA	Satb2:MSTRG.29208.2	bta-miR-2478_L-2	Anks1a:ENSRNOT00000081604
lncRNA	Tab2:MSTRG.1063.2	bta-miR-2478_L-2	Anks1a:ENSRNOT00000081604
lncRNA	Ttc28:MSTRG.8169.2	bta-miR-2478_L-2	Anks1a:ENSRNOT00000081604
lncRNA	Ttll13:MSTRG.2609.1	bta-miR-2478_L-2	Anks1a:ENSRNOT00000081604
circRNA	ciRNA166	bta-miR-2478_L-2	Anks1a:ENSRNOT00000081604
circRNA	ciRNA56	bta-miR-2478_L-2	Anks1a:ENSRNOT00000081604
circRNA	circRNA1488	bta-miR-2478_L-2	Anks1a:ENSRNOT00000081604
circRNA	circRNA1571	bta-miR-2478_L-2	Anks1a:ENSRNOT00000081604
circRNA	circRNA1578	bta-miR-2478_L-2	Anks1a:ENSRNOT00000081604
circRNA	circRNA4490	bta-miR-2478_L-2	Anks1a:ENSRNOT00000081604
circRNA	circRNA4510	bta-miR-2478_L-2	Anks1a:ENSRNOT00000081604
circRNA	circRNA4520	bta-miR-2478_L-2	Anks1a:ENSRNOT00000081604
lncRNA	.:MSTRG.14147.1	bta-miR-2478_L-2	Dennd1a:ENSRNOT00000091747
lncRNA	.:MSTRG.15267.1	bta-miR-2478_L-2	Dennd1a:ENSRNOT00000091747
lncRNA	.:MSTRG.218.2	bta-miR-2478_L-2	Dennd1a:ENSRNOT00000091747
lncRNA	.:MSTRG.22402.4	bta-miR-2478_L-2	Dennd1a:ENSRNOT00000091747
lncRNA	.:MSTRG.23375.1	bta-miR-2478_L-2	Dennd1a:ENSRNOT00000091747
lncRNA	.:MSTRG.28897.2	bta-miR-2478_L-2	Dennd1a:ENSRNOT00000091747
lncRNA	.:MSTRG.5260.1	bta-miR-2478_L-2	Dennd1a:ENSRNOT00000091747
lncRNA	.:MSTRG.9706.2	bta-miR-2478_L-2	Dennd1a:ENSRNOT00000091747
lncRNA	AABR07009428:MSTRG.15407.7	bta-miR-2478_L-2	Dennd1a:ENSRNOT00000091747
lncRNA	AC134224:ENSRNOT00000093096	bta-miR-2478_L-2	Dennd1a:ENSRNOT00000091747
lncRNA	Bend4:MSTRG.9559.3	bta-miR-2478_L-2	Dennd1a:ENSRNOT00000091747
lncRNA	Cdv3:MSTRG.28073.1	bta-miR-2478_L-2	Dennd1a:ENSRNOT00000091747
lncRNA	Chtop:MSTRG.16142.1	bta-miR-2478_L-2	Dennd1a:ENSRNOT00000091747
lncRNA	Clint1:MSTRG.4783.3	bta-miR-2478_L-2	Dennd1a:ENSRNOT00000091747
lncRNA	Cox7a1:MSTRG.2214.2	bta-miR-2478_L-2	Dennd1a:ENSRNOT00000091747
lncRNA	Crebbp:MSTRG.4516.5	bta-miR-2478_L-2	Dennd1a:ENSRNOT00000091747
lncRNA	Ebf1:MSTRG.4748.3	bta-miR-2478_L-2	Dennd1a:ENSRNOT00000091747
lncRNA	Kcnk12:MSTRG.23640.1	bta-miR-2478_L-2	Dennd1a:ENSRNOT00000091747
lncRNA	Kcnk12:MSTRG.23640.3	bta-miR-2478_L-2	Dennd1a:ENSRNOT00000091747
lncRNA	LOC689840:MSTRG.26880.1	bta-miR-2478_L-2	Dennd1a:ENSRNOT00000091747
lncRNA	Mef2c:MSTRG.14762.2	bta-miR-2478_L-2	Dennd1a:ENSRNOT00000091747
lncRNA	Pde6d:MSTRG.29521.2	bta-miR-2478_L-2	Dennd1a:ENSRNOT00000091747
lncRNA	Pip4p2:MSTRG.21869.3	bta-miR-2478_L-2	Dennd1a:ENSRNOT00000091747
lncRNA	Satb2:MSTRG.29208.2	bta-miR-2478_L-2	Dennd1a:ENSRNOT00000091747
lncRNA	Tab2:MSTRG.1063.2	bta-miR-2478_L-2	Dennd1a:ENSRNOT00000091747
lncRNA	Ttc28:MSTRG.8169.2	bta-miR-2478_L-2	Dennd1a:ENSRNOT00000091747
lncRNA	Ttll13:MSTRG.2609.1	bta-miR-2478_L-2	Dennd1a:ENSRNOT00000091747
circRNA	ciRNA166	bta-miR-2478_L-2	Dennd1a:ENSRNOT00000091747
circRNA	ciRNA56	bta-miR-2478_L-2	Dennd1a:ENSRNOT00000091747
circRNA	circRNA1488	bta-miR-2478_L-2	Dennd1a:ENSRNOT00000091747
circRNA	circRNA1571	bta-miR-2478_L-2	Dennd1a:ENSRNOT00000091747
circRNA	circRNA1578	bta-miR-2478_L-2	Dennd1a:ENSRNOT00000091747
circRNA	circRNA4490	bta-miR-2478_L-2	Dennd1a:ENSRNOT00000091747
circRNA	circRNA4510	bta-miR-2478_L-2	Dennd1a:ENSRNOT00000091747
circRNA	circRNA4520	bta-miR-2478_L-2	Dennd1a:ENSRNOT00000091747
lncRNA	.:MSTRG.14147.1	bta-miR-2478_L-2	Kif16b:ENSRNOT00000036273
lncRNA	.:MSTRG.15267.1	bta-miR-2478_L-2	Kif16b:ENSRNOT00000036273
lncRNA	.:MSTRG.218.2	bta-miR-2478_L-2	Kif16b:ENSRNOT00000036273
lncRNA	.:MSTRG.22402.4	bta-miR-2478_L-2	Kif16b:ENSRNOT00000036273
lncRNA	.:MSTRG.23375.1	bta-miR-2478_L-2	Kif16b:ENSRNOT00000036273
lncRNA	.:MSTRG.28897.2	bta-miR-2478_L-2	Kif16b:ENSRNOT00000036273
lncRNA	.:MSTRG.5260.1	bta-miR-2478_L-2	Kif16b:ENSRNOT00000036273
lncRNA	.:MSTRG.9706.2	bta-miR-2478_L-2	Kif16b:ENSRNOT00000036273
lncRNA	AABR07009428:MSTRG.15407.7	bta-miR-2478_L-2	Kif16b:ENSRNOT00000036273
lncRNA	AC134224:ENSRNOT00000093096	bta-miR-2478_L-2	Kif16b:ENSRNOT00000036273
lncRNA	Bend4:MSTRG.9559.3	bta-miR-2478_L-2	Kif16b:ENSRNOT00000036273
lncRNA	Cdv3:MSTRG.28073.1	bta-miR-2478_L-2	Kif16b:ENSRNOT00000036273
lncRNA	Chtop:MSTRG.16142.1	bta-miR-2478_L-2	Kif16b:ENSRNOT00000036273
lncRNA	Clint1:MSTRG.4783.3	bta-miR-2478_L-2	Kif16b:ENSRNOT00000036273
lncRNA	Cox7a1:MSTRG.2214.2	bta-miR-2478_L-2	Kif16b:ENSRNOT00000036273
lncRNA	Crebbp:MSTRG.4516.5	bta-miR-2478_L-2	Kif16b:ENSRNOT00000036273
lncRNA	Ebf1:MSTRG.4748.3	bta-miR-2478_L-2	Kif16b:ENSRNOT00000036273
lncRNA	Kcnk12:MSTRG.23640.1	bta-miR-2478_L-2	Kif16b:ENSRNOT00000036273
lncRNA	Kcnk12:MSTRG.23640.3	bta-miR-2478_L-2	Kif16b:ENSRNOT00000036273
lncRNA	LOC689840:MSTRG.26880.1	bta-miR-2478_L-2	Kif16b:ENSRNOT00000036273
lncRNA	Mef2c:MSTRG.14762.2	bta-miR-2478_L-2	Kif16b:ENSRNOT00000036273
lncRNA	Pde6d:MSTRG.29521.2	bta-miR-2478_L-2	Kif16b:ENSRNOT00000036273
lncRNA	Pip4p2:MSTRG.21869.3	bta-miR-2478_L-2	Kif16b:ENSRNOT00000036273
lncRNA	Satb2:MSTRG.29208.2	bta-miR-2478_L-2	Kif16b:ENSRNOT00000036273
lncRNA	Tab2:MSTRG.1063.2	bta-miR-2478_L-2	Kif16b:ENSRNOT00000036273
lncRNA	Ttc28:MSTRG.8169.2	bta-miR-2478_L-2	Kif16b:ENSRNOT00000036273
lncRNA	Ttll13:MSTRG.2609.1	bta-miR-2478_L-2	Kif16b:ENSRNOT00000036273
circRNA	ciRNA166	bta-miR-2478_L-2	Kif16b:ENSRNOT00000036273
circRNA	ciRNA56	bta-miR-2478_L-2	Kif16b:ENSRNOT00000036273
circRNA	circRNA1488	bta-miR-2478_L-2	Kif16b:ENSRNOT00000036273
circRNA	circRNA1571	bta-miR-2478_L-2	Kif16b:ENSRNOT00000036273
circRNA	circRNA1578	bta-miR-2478_L-2	Kif16b:ENSRNOT00000036273
circRNA	circRNA4490	bta-miR-2478_L-2	Kif16b:ENSRNOT00000036273
circRNA	circRNA4510	bta-miR-2478_L-2	Kif16b:ENSRNOT00000036273
circRNA	circRNA4520	bta-miR-2478_L-2	Kif16b:ENSRNOT00000036273
lncRNA	.:MSTRG.14147.1	bta-miR-2478_L-2	Nrf1:ENSRNOT00000080173
lncRNA	.:MSTRG.15267.1	bta-miR-2478_L-2	Nrf1:ENSRNOT00000080173
lncRNA	.:MSTRG.218.2	bta-miR-2478_L-2	Nrf1:ENSRNOT00000080173
lncRNA	.:MSTRG.22402.4	bta-miR-2478_L-2	Nrf1:ENSRNOT00000080173
lncRNA	.:MSTRG.23375.1	bta-miR-2478_L-2	Nrf1:ENSRNOT00000080173
lncRNA	.:MSTRG.28897.2	bta-miR-2478_L-2	Nrf1:ENSRNOT00000080173
lncRNA	.:MSTRG.5260.1	bta-miR-2478_L-2	Nrf1:ENSRNOT00000080173
lncRNA	.:MSTRG.9706.2	bta-miR-2478_L-2	Nrf1:ENSRNOT00000080173
lncRNA	AABR07009428:MSTRG.15407.7	bta-miR-2478_L-2	Nrf1:ENSRNOT00000080173
lncRNA	AC134224:ENSRNOT00000093096	bta-miR-2478_L-2	Nrf1:ENSRNOT00000080173
lncRNA	Bend4:MSTRG.9559.3	bta-miR-2478_L-2	Nrf1:ENSRNOT00000080173
lncRNA	Cdv3:MSTRG.28073.1	bta-miR-2478_L-2	Nrf1:ENSRNOT00000080173
lncRNA	Chtop:MSTRG.16142.1	bta-miR-2478_L-2	Nrf1:ENSRNOT00000080173
lncRNA	Clint1:MSTRG.4783.3	bta-miR-2478_L-2	Nrf1:ENSRNOT00000080173
lncRNA	Cox7a1:MSTRG.2214.2	bta-miR-2478_L-2	Nrf1:ENSRNOT00000080173
lncRNA	Crebbp:MSTRG.4516.5	bta-miR-2478_L-2	Nrf1:ENSRNOT00000080173
lncRNA	Ebf1:MSTRG.4748.3	bta-miR-2478_L-2	Nrf1:ENSRNOT00000080173
lncRNA	Kcnk12:MSTRG.23640.1	bta-miR-2478_L-2	Nrf1:ENSRNOT00000080173
lncRNA	Kcnk12:MSTRG.23640.3	bta-miR-2478_L-2	Nrf1:ENSRNOT00000080173
lncRNA	LOC689840:MSTRG.26880.1	bta-miR-2478_L-2	Nrf1:ENSRNOT00000080173
lncRNA	Mef2c:MSTRG.14762.2	bta-miR-2478_L-2	Nrf1:ENSRNOT00000080173
lncRNA	Pde6d:MSTRG.29521.2	bta-miR-2478_L-2	Nrf1:ENSRNOT00000080173
lncRNA	Pip4p2:MSTRG.21869.3	bta-miR-2478_L-2	Nrf1:ENSRNOT00000080173
lncRNA	Satb2:MSTRG.29208.2	bta-miR-2478_L-2	Nrf1:ENSRNOT00000080173
lncRNA	Tab2:MSTRG.1063.2	bta-miR-2478_L-2	Nrf1:ENSRNOT00000080173
lncRNA	Ttc28:MSTRG.8169.2	bta-miR-2478_L-2	Nrf1:ENSRNOT00000080173
lncRNA	Ttll13:MSTRG.2609.1	bta-miR-2478_L-2	Nrf1:ENSRNOT00000080173
circRNA	ciRNA166	bta-miR-2478_L-2	Nrf1:ENSRNOT00000080173
circRNA	ciRNA56	bta-miR-2478_L-2	Nrf1:ENSRNOT00000080173
circRNA	circRNA1488	bta-miR-2478_L-2	Nrf1:ENSRNOT00000080173
circRNA	circRNA1571	bta-miR-2478_L-2	Nrf1:ENSRNOT00000080173
circRNA	circRNA1578	bta-miR-2478_L-2	Nrf1:ENSRNOT00000080173
circRNA	circRNA4490	bta-miR-2478_L-2	Nrf1:ENSRNOT00000080173
circRNA	circRNA4510	bta-miR-2478_L-2	Nrf1:ENSRNOT00000080173
circRNA	circRNA4520	bta-miR-2478_L-2	Nrf1:ENSRNOT00000080173
lncRNA	.:MSTRG.14147.1	bta-miR-2478_L-2	Pdk3:ENSRNOT00000076652
lncRNA	.:MSTRG.15267.1	bta-miR-2478_L-2	Pdk3:ENSRNOT00000076652
lncRNA	.:MSTRG.218.2	bta-miR-2478_L-2	Pdk3:ENSRNOT00000076652
lncRNA	.:MSTRG.22402.4	bta-miR-2478_L-2	Pdk3:ENSRNOT00000076652
lncRNA	.:MSTRG.23375.1	bta-miR-2478_L-2	Pdk3:ENSRNOT00000076652
lncRNA	.:MSTRG.28897.2	bta-miR-2478_L-2	Pdk3:ENSRNOT00000076652
lncRNA	.:MSTRG.5260.1	bta-miR-2478_L-2	Pdk3:ENSRNOT00000076652
lncRNA	.:MSTRG.9706.2	bta-miR-2478_L-2	Pdk3:ENSRNOT00000076652
lncRNA	AABR07009428:MSTRG.15407.7	bta-miR-2478_L-2	Pdk3:ENSRNOT00000076652
lncRNA	AC134224:ENSRNOT00000093096	bta-miR-2478_L-2	Pdk3:ENSRNOT00000076652
lncRNA	Bend4:MSTRG.9559.3	bta-miR-2478_L-2	Pdk3:ENSRNOT00000076652
lncRNA	Cdv3:MSTRG.28073.1	bta-miR-2478_L-2	Pdk3:ENSRNOT00000076652
lncRNA	Chtop:MSTRG.16142.1	bta-miR-2478_L-2	Pdk3:ENSRNOT00000076652
lncRNA	Clint1:MSTRG.4783.3	bta-miR-2478_L-2	Pdk3:ENSRNOT00000076652
lncRNA	Cox7a1:MSTRG.2214.2	bta-miR-2478_L-2	Pdk3:ENSRNOT00000076652
lncRNA	Crebbp:MSTRG.4516.5	bta-miR-2478_L-2	Pdk3:ENSRNOT00000076652
lncRNA	Ebf1:MSTRG.4748.3	bta-miR-2478_L-2	Pdk3:ENSRNOT00000076652
lncRNA	Kcnk12:MSTRG.23640.1	bta-miR-2478_L-2	Pdk3:ENSRNOT00000076652
lncRNA	Kcnk12:MSTRG.23640.3	bta-miR-2478_L-2	Pdk3:ENSRNOT00000076652
lncRNA	LOC689840:MSTRG.26880.1	bta-miR-2478_L-2	Pdk3:ENSRNOT00000076652
lncRNA	Mef2c:MSTRG.14762.2	bta-miR-2478_L-2	Pdk3:ENSRNOT00000076652
lncRNA	Pde6d:MSTRG.29521.2	bta-miR-2478_L-2	Pdk3:ENSRNOT00000076652
lncRNA	Pip4p2:MSTRG.21869.3	bta-miR-2478_L-2	Pdk3:ENSRNOT00000076652
lncRNA	Satb2:MSTRG.29208.2	bta-miR-2478_L-2	Pdk3:ENSRNOT00000076652
lncRNA	Tab2:MSTRG.1063.2	bta-miR-2478_L-2	Pdk3:ENSRNOT00000076652
lncRNA	Ttc28:MSTRG.8169.2	bta-miR-2478_L-2	Pdk3:ENSRNOT00000076652
lncRNA	Ttll13:MSTRG.2609.1	bta-miR-2478_L-2	Pdk3:ENSRNOT00000076652
circRNA	ciRNA166	bta-miR-2478_L-2	Pdk3:ENSRNOT00000076652
circRNA	ciRNA56	bta-miR-2478_L-2	Pdk3:ENSRNOT00000076652
circRNA	circRNA1488	bta-miR-2478_L-2	Pdk3:ENSRNOT00000076652
circRNA	circRNA1571	bta-miR-2478_L-2	Pdk3:ENSRNOT00000076652
circRNA	circRNA1578	bta-miR-2478_L-2	Pdk3:ENSRNOT00000076652
circRNA	circRNA4490	bta-miR-2478_L-2	Pdk3:ENSRNOT00000076652
circRNA	circRNA4510	bta-miR-2478_L-2	Pdk3:ENSRNOT00000076652
circRNA	circRNA4520	bta-miR-2478_L-2	Pdk3:ENSRNOT00000076652
lncRNA	.:MSTRG.14147.1	bta-miR-2478_L-2	Prelp:ENSRNOT00000079116
lncRNA	.:MSTRG.15267.1	bta-miR-2478_L-2	Prelp:ENSRNOT00000079116
lncRNA	.:MSTRG.218.2	bta-miR-2478_L-2	Prelp:ENSRNOT00000079116
lncRNA	.:MSTRG.22402.4	bta-miR-2478_L-2	Prelp:ENSRNOT00000079116
lncRNA	.:MSTRG.23375.1	bta-miR-2478_L-2	Prelp:ENSRNOT00000079116
lncRNA	.:MSTRG.28897.2	bta-miR-2478_L-2	Prelp:ENSRNOT00000079116
lncRNA	.:MSTRG.5260.1	bta-miR-2478_L-2	Prelp:ENSRNOT00000079116
lncRNA	.:MSTRG.9706.2	bta-miR-2478_L-2	Prelp:ENSRNOT00000079116
lncRNA	AABR07009428:MSTRG.15407.7	bta-miR-2478_L-2	Prelp:ENSRNOT00000079116
lncRNA	AC134224:ENSRNOT00000093096	bta-miR-2478_L-2	Prelp:ENSRNOT00000079116
lncRNA	Bend4:MSTRG.9559.3	bta-miR-2478_L-2	Prelp:ENSRNOT00000079116
lncRNA	Cdv3:MSTRG.28073.1	bta-miR-2478_L-2	Prelp:ENSRNOT00000079116
lncRNA	Chtop:MSTRG.16142.1	bta-miR-2478_L-2	Prelp:ENSRNOT00000079116
lncRNA	Clint1:MSTRG.4783.3	bta-miR-2478_L-2	Prelp:ENSRNOT00000079116
lncRNA	Cox7a1:MSTRG.2214.2	bta-miR-2478_L-2	Prelp:ENSRNOT00000079116
lncRNA	Crebbp:MSTRG.4516.5	bta-miR-2478_L-2	Prelp:ENSRNOT00000079116
lncRNA	Ebf1:MSTRG.4748.3	bta-miR-2478_L-2	Prelp:ENSRNOT00000079116
lncRNA	Kcnk12:MSTRG.23640.1	bta-miR-2478_L-2	Prelp:ENSRNOT00000079116
lncRNA	Kcnk12:MSTRG.23640.3	bta-miR-2478_L-2	Prelp:ENSRNOT00000079116
lncRNA	LOC689840:MSTRG.26880.1	bta-miR-2478_L-2	Prelp:ENSRNOT00000079116
lncRNA	Mef2c:MSTRG.14762.2	bta-miR-2478_L-2	Prelp:ENSRNOT00000079116
lncRNA	Pde6d:MSTRG.29521.2	bta-miR-2478_L-2	Prelp:ENSRNOT00000079116
lncRNA	Pip4p2:MSTRG.21869.3	bta-miR-2478_L-2	Prelp:ENSRNOT00000079116
lncRNA	Satb2:MSTRG.29208.2	bta-miR-2478_L-2	Prelp:ENSRNOT00000079116
lncRNA	Tab2:MSTRG.1063.2	bta-miR-2478_L-2	Prelp:ENSRNOT00000079116
lncRNA	Ttc28:MSTRG.8169.2	bta-miR-2478_L-2	Prelp:ENSRNOT00000079116
lncRNA	Ttll13:MSTRG.2609.1	bta-miR-2478_L-2	Prelp:ENSRNOT00000079116
circRNA	ciRNA166	bta-miR-2478_L-2	Prelp:ENSRNOT00000079116
circRNA	ciRNA56	bta-miR-2478_L-2	Prelp:ENSRNOT00000079116
circRNA	circRNA1488	bta-miR-2478_L-2	Prelp:ENSRNOT00000079116
circRNA	circRNA1571	bta-miR-2478_L-2	Prelp:ENSRNOT00000079116
circRNA	circRNA1578	bta-miR-2478_L-2	Prelp:ENSRNOT00000079116
circRNA	circRNA4490	bta-miR-2478_L-2	Prelp:ENSRNOT00000079116
circRNA	circRNA4510	bta-miR-2478_L-2	Prelp:ENSRNOT00000079116
circRNA	circRNA4520	bta-miR-2478_L-2	Prelp:ENSRNOT00000079116
lncRNA	.:MSTRG.14147.1	bta-miR-2478_L-2	Ptprc:ENSRNOT00000029865
lncRNA	.:MSTRG.15267.1	bta-miR-2478_L-2	Ptprc:ENSRNOT00000029865
lncRNA	.:MSTRG.218.2	bta-miR-2478_L-2	Ptprc:ENSRNOT00000029865
lncRNA	.:MSTRG.22402.4	bta-miR-2478_L-2	Ptprc:ENSRNOT00000029865
lncRNA	.:MSTRG.23375.1	bta-miR-2478_L-2	Ptprc:ENSRNOT00000029865
lncRNA	.:MSTRG.28897.2	bta-miR-2478_L-2	Ptprc:ENSRNOT00000029865
lncRNA	.:MSTRG.5260.1	bta-miR-2478_L-2	Ptprc:ENSRNOT00000029865
lncRNA	.:MSTRG.9706.2	bta-miR-2478_L-2	Ptprc:ENSRNOT00000029865
lncRNA	AABR07009428:MSTRG.15407.7	bta-miR-2478_L-2	Ptprc:ENSRNOT00000029865
lncRNA	AC134224:ENSRNOT00000093096	bta-miR-2478_L-2	Ptprc:ENSRNOT00000029865
lncRNA	Bend4:MSTRG.9559.3	bta-miR-2478_L-2	Ptprc:ENSRNOT00000029865
lncRNA	Cdv3:MSTRG.28073.1	bta-miR-2478_L-2	Ptprc:ENSRNOT00000029865
lncRNA	Chtop:MSTRG.16142.1	bta-miR-2478_L-2	Ptprc:ENSRNOT00000029865
lncRNA	Clint1:MSTRG.4783.3	bta-miR-2478_L-2	Ptprc:ENSRNOT00000029865
lncRNA	Cox7a1:MSTRG.2214.2	bta-miR-2478_L-2	Ptprc:ENSRNOT00000029865
lncRNA	Crebbp:MSTRG.4516.5	bta-miR-2478_L-2	Ptprc:ENSRNOT00000029865
lncRNA	Ebf1:MSTRG.4748.3	bta-miR-2478_L-2	Ptprc:ENSRNOT00000029865
lncRNA	Kcnk12:MSTRG.23640.1	bta-miR-2478_L-2	Ptprc:ENSRNOT00000029865
lncRNA	Kcnk12:MSTRG.23640.3	bta-miR-2478_L-2	Ptprc:ENSRNOT00000029865
lncRNA	LOC689840:MSTRG.26880.1	bta-miR-2478_L-2	Ptprc:ENSRNOT00000029865
lncRNA	Mef2c:MSTRG.14762.2	bta-miR-2478_L-2	Ptprc:ENSRNOT00000029865
lncRNA	Pde6d:MSTRG.29521.2	bta-miR-2478_L-2	Ptprc:ENSRNOT00000029865
lncRNA	Pip4p2:MSTRG.21869.3	bta-miR-2478_L-2	Ptprc:ENSRNOT00000029865
lncRNA	Satb2:MSTRG.29208.2	bta-miR-2478_L-2	Ptprc:ENSRNOT00000029865
lncRNA	Tab2:MSTRG.1063.2	bta-miR-2478_L-2	Ptprc:ENSRNOT00000029865
lncRNA	Ttc28:MSTRG.8169.2	bta-miR-2478_L-2	Ptprc:ENSRNOT00000029865
lncRNA	Ttll13:MSTRG.2609.1	bta-miR-2478_L-2	Ptprc:ENSRNOT00000029865
circRNA	ciRNA166	bta-miR-2478_L-2	Ptprc:ENSRNOT00000029865
circRNA	ciRNA56	bta-miR-2478_L-2	Ptprc:ENSRNOT00000029865
circRNA	circRNA1488	bta-miR-2478_L-2	Ptprc:ENSRNOT00000029865
circRNA	circRNA1571	bta-miR-2478_L-2	Ptprc:ENSRNOT00000029865
circRNA	circRNA1578	bta-miR-2478_L-2	Ptprc:ENSRNOT00000029865
circRNA	circRNA4490	bta-miR-2478_L-2	Ptprc:ENSRNOT00000029865
circRNA	circRNA4510	bta-miR-2478_L-2	Ptprc:ENSRNOT00000029865
circRNA	circRNA4520	bta-miR-2478_L-2	Ptprc:ENSRNOT00000029865
lncRNA	.:MSTRG.14147.1	bta-miR-2478_L-2	Ripor1:ENSRNOT00000089022
lncRNA	.:MSTRG.15267.1	bta-miR-2478_L-2	Ripor1:ENSRNOT00000089022
lncRNA	.:MSTRG.218.2	bta-miR-2478_L-2	Ripor1:ENSRNOT00000089022
lncRNA	.:MSTRG.22402.4	bta-miR-2478_L-2	Ripor1:ENSRNOT00000089022
lncRNA	.:MSTRG.23375.1	bta-miR-2478_L-2	Ripor1:ENSRNOT00000089022
lncRNA	.:MSTRG.28897.2	bta-miR-2478_L-2	Ripor1:ENSRNOT00000089022
lncRNA	.:MSTRG.5260.1	bta-miR-2478_L-2	Ripor1:ENSRNOT00000089022
lncRNA	.:MSTRG.9706.2	bta-miR-2478_L-2	Ripor1:ENSRNOT00000089022
lncRNA	AABR07009428:MSTRG.15407.7	bta-miR-2478_L-2	Ripor1:ENSRNOT00000089022
lncRNA	AC134224:ENSRNOT00000093096	bta-miR-2478_L-2	Ripor1:ENSRNOT00000089022
lncRNA	Bend4:MSTRG.9559.3	bta-miR-2478_L-2	Ripor1:ENSRNOT00000089022
lncRNA	Cdv3:MSTRG.28073.1	bta-miR-2478_L-2	Ripor1:ENSRNOT00000089022
lncRNA	Chtop:MSTRG.16142.1	bta-miR-2478_L-2	Ripor1:ENSRNOT00000089022
lncRNA	Clint1:MSTRG.4783.3	bta-miR-2478_L-2	Ripor1:ENSRNOT00000089022
lncRNA	Cox7a1:MSTRG.2214.2	bta-miR-2478_L-2	Ripor1:ENSRNOT00000089022
lncRNA	Crebbp:MSTRG.4516.5	bta-miR-2478_L-2	Ripor1:ENSRNOT00000089022
lncRNA	Ebf1:MSTRG.4748.3	bta-miR-2478_L-2	Ripor1:ENSRNOT00000089022
lncRNA	Kcnk12:MSTRG.23640.1	bta-miR-2478_L-2	Ripor1:ENSRNOT00000089022
lncRNA	Kcnk12:MSTRG.23640.3	bta-miR-2478_L-2	Ripor1:ENSRNOT00000089022
lncRNA	LOC689840:MSTRG.26880.1	bta-miR-2478_L-2	Ripor1:ENSRNOT00000089022
lncRNA	Mef2c:MSTRG.14762.2	bta-miR-2478_L-2	Ripor1:ENSRNOT00000089022
lncRNA	Pde6d:MSTRG.29521.2	bta-miR-2478_L-2	Ripor1:ENSRNOT00000089022
lncRNA	Pip4p2:MSTRG.21869.3	bta-miR-2478_L-2	Ripor1:ENSRNOT00000089022
lncRNA	Satb2:MSTRG.29208.2	bta-miR-2478_L-2	Ripor1:ENSRNOT00000089022
lncRNA	Tab2:MSTRG.1063.2	bta-miR-2478_L-2	Ripor1:ENSRNOT00000089022
lncRNA	Ttc28:MSTRG.8169.2	bta-miR-2478_L-2	Ripor1:ENSRNOT00000089022
lncRNA	Ttll13:MSTRG.2609.1	bta-miR-2478_L-2	Ripor1:ENSRNOT00000089022
circRNA	ciRNA166	bta-miR-2478_L-2	Ripor1:ENSRNOT00000089022
circRNA	ciRNA56	bta-miR-2478_L-2	Ripor1:ENSRNOT00000089022
circRNA	circRNA1488	bta-miR-2478_L-2	Ripor1:ENSRNOT00000089022
circRNA	circRNA1571	bta-miR-2478_L-2	Ripor1:ENSRNOT00000089022
circRNA	circRNA1578	bta-miR-2478_L-2	Ripor1:ENSRNOT00000089022
circRNA	circRNA4490	bta-miR-2478_L-2	Ripor1:ENSRNOT00000089022
circRNA	circRNA4510	bta-miR-2478_L-2	Ripor1:ENSRNOT00000089022
circRNA	circRNA4520	bta-miR-2478_L-2	Ripor1:ENSRNOT00000089022
lncRNA	.:MSTRG.14147.1	bta-miR-2478_L-2	Slc22a5:ENSRNOT00000081898
lncRNA	.:MSTRG.15267.1	bta-miR-2478_L-2	Slc22a5:ENSRNOT00000081898
lncRNA	.:MSTRG.218.2	bta-miR-2478_L-2	Slc22a5:ENSRNOT00000081898
lncRNA	.:MSTRG.22402.4	bta-miR-2478_L-2	Slc22a5:ENSRNOT00000081898
lncRNA	.:MSTRG.23375.1	bta-miR-2478_L-2	Slc22a5:ENSRNOT00000081898
lncRNA	.:MSTRG.28897.2	bta-miR-2478_L-2	Slc22a5:ENSRNOT00000081898
lncRNA	.:MSTRG.5260.1	bta-miR-2478_L-2	Slc22a5:ENSRNOT00000081898
lncRNA	.:MSTRG.9706.2	bta-miR-2478_L-2	Slc22a5:ENSRNOT00000081898
lncRNA	AABR07009428:MSTRG.15407.7	bta-miR-2478_L-2	Slc22a5:ENSRNOT00000081898
lncRNA	AC134224:ENSRNOT00000093096	bta-miR-2478_L-2	Slc22a5:ENSRNOT00000081898
lncRNA	Bend4:MSTRG.9559.3	bta-miR-2478_L-2	Slc22a5:ENSRNOT00000081898
lncRNA	Cdv3:MSTRG.28073.1	bta-miR-2478_L-2	Slc22a5:ENSRNOT00000081898
lncRNA	Chtop:MSTRG.16142.1	bta-miR-2478_L-2	Slc22a5:ENSRNOT00000081898
lncRNA	Clint1:MSTRG.4783.3	bta-miR-2478_L-2	Slc22a5:ENSRNOT00000081898
lncRNA	Cox7a1:MSTRG.2214.2	bta-miR-2478_L-2	Slc22a5:ENSRNOT00000081898
lncRNA	Crebbp:MSTRG.4516.5	bta-miR-2478_L-2	Slc22a5:ENSRNOT00000081898
lncRNA	Ebf1:MSTRG.4748.3	bta-miR-2478_L-2	Slc22a5:ENSRNOT00000081898
lncRNA	Kcnk12:MSTRG.23640.1	bta-miR-2478_L-2	Slc22a5:ENSRNOT00000081898
lncRNA	Kcnk12:MSTRG.23640.3	bta-miR-2478_L-2	Slc22a5:ENSRNOT00000081898
lncRNA	LOC689840:MSTRG.26880.1	bta-miR-2478_L-2	Slc22a5:ENSRNOT00000081898
lncRNA	Mef2c:MSTRG.14762.2	bta-miR-2478_L-2	Slc22a5:ENSRNOT00000081898
lncRNA	Pde6d:MSTRG.29521.2	bta-miR-2478_L-2	Slc22a5:ENSRNOT00000081898
lncRNA	Pip4p2:MSTRG.21869.3	bta-miR-2478_L-2	Slc22a5:ENSRNOT00000081898
lncRNA	Satb2:MSTRG.29208.2	bta-miR-2478_L-2	Slc22a5:ENSRNOT00000081898
lncRNA	Tab2:MSTRG.1063.2	bta-miR-2478_L-2	Slc22a5:ENSRNOT00000081898
lncRNA	Ttc28:MSTRG.8169.2	bta-miR-2478_L-2	Slc22a5:ENSRNOT00000081898
lncRNA	Ttll13:MSTRG.2609.1	bta-miR-2478_L-2	Slc22a5:ENSRNOT00000081898
circRNA	ciRNA166	bta-miR-2478_L-2	Slc22a5:ENSRNOT00000081898
circRNA	ciRNA56	bta-miR-2478_L-2	Slc22a5:ENSRNOT00000081898
circRNA	circRNA1488	bta-miR-2478_L-2	Slc22a5:ENSRNOT00000081898
circRNA	circRNA1571	bta-miR-2478_L-2	Slc22a5:ENSRNOT00000081898
circRNA	circRNA1578	bta-miR-2478_L-2	Slc22a5:ENSRNOT00000081898
circRNA	circRNA4490	bta-miR-2478_L-2	Slc22a5:ENSRNOT00000081898
circRNA	circRNA4510	bta-miR-2478_L-2	Slc22a5:ENSRNOT00000081898
circRNA	circRNA4520	bta-miR-2478_L-2	Slc22a5:ENSRNOT00000081898
lncRNA	.:MSTRG.14147.1	bta-miR-2478_L-2	Slc25a25:ENSRNOT00000020206
lncRNA	.:MSTRG.15267.1	bta-miR-2478_L-2	Slc25a25:ENSRNOT00000020206
lncRNA	.:MSTRG.218.2	bta-miR-2478_L-2	Slc25a25:ENSRNOT00000020206
lncRNA	.:MSTRG.22402.4	bta-miR-2478_L-2	Slc25a25:ENSRNOT00000020206
lncRNA	.:MSTRG.23375.1	bta-miR-2478_L-2	Slc25a25:ENSRNOT00000020206
lncRNA	.:MSTRG.28897.2	bta-miR-2478_L-2	Slc25a25:ENSRNOT00000020206
lncRNA	.:MSTRG.5260.1	bta-miR-2478_L-2	Slc25a25:ENSRNOT00000020206
lncRNA	.:MSTRG.9706.2	bta-miR-2478_L-2	Slc25a25:ENSRNOT00000020206
lncRNA	AABR07009428:MSTRG.15407.7	bta-miR-2478_L-2	Slc25a25:ENSRNOT00000020206
lncRNA	AC134224:ENSRNOT00000093096	bta-miR-2478_L-2	Slc25a25:ENSRNOT00000020206
lncRNA	Bend4:MSTRG.9559.3	bta-miR-2478_L-2	Slc25a25:ENSRNOT00000020206
lncRNA	Cdv3:MSTRG.28073.1	bta-miR-2478_L-2	Slc25a25:ENSRNOT00000020206
lncRNA	Chtop:MSTRG.16142.1	bta-miR-2478_L-2	Slc25a25:ENSRNOT00000020206
lncRNA	Clint1:MSTRG.4783.3	bta-miR-2478_L-2	Slc25a25:ENSRNOT00000020206
lncRNA	Cox7a1:MSTRG.2214.2	bta-miR-2478_L-2	Slc25a25:ENSRNOT00000020206
lncRNA	Crebbp:MSTRG.4516.5	bta-miR-2478_L-2	Slc25a25:ENSRNOT00000020206
lncRNA	Ebf1:MSTRG.4748.3	bta-miR-2478_L-2	Slc25a25:ENSRNOT00000020206
lncRNA	Kcnk12:MSTRG.23640.1	bta-miR-2478_L-2	Slc25a25:ENSRNOT00000020206
lncRNA	Kcnk12:MSTRG.23640.3	bta-miR-2478_L-2	Slc25a25:ENSRNOT00000020206
lncRNA	LOC689840:MSTRG.26880.1	bta-miR-2478_L-2	Slc25a25:ENSRNOT00000020206
lncRNA	Mef2c:MSTRG.14762.2	bta-miR-2478_L-2	Slc25a25:ENSRNOT00000020206
lncRNA	Pde6d:MSTRG.29521.2	bta-miR-2478_L-2	Slc25a25:ENSRNOT00000020206
lncRNA	Pip4p2:MSTRG.21869.3	bta-miR-2478_L-2	Slc25a25:ENSRNOT00000020206
lncRNA	Satb2:MSTRG.29208.2	bta-miR-2478_L-2	Slc25a25:ENSRNOT00000020206
lncRNA	Tab2:MSTRG.1063.2	bta-miR-2478_L-2	Slc25a25:ENSRNOT00000020206
lncRNA	Ttc28:MSTRG.8169.2	bta-miR-2478_L-2	Slc25a25:ENSRNOT00000020206
lncRNA	Ttll13:MSTRG.2609.1	bta-miR-2478_L-2	Slc25a25:ENSRNOT00000020206
circRNA	ciRNA166	bta-miR-2478_L-2	Slc25a25:ENSRNOT00000020206
circRNA	ciRNA56	bta-miR-2478_L-2	Slc25a25:ENSRNOT00000020206
circRNA	circRNA1488	bta-miR-2478_L-2	Slc25a25:ENSRNOT00000020206
circRNA	circRNA1571	bta-miR-2478_L-2	Slc25a25:ENSRNOT00000020206
circRNA	circRNA1578	bta-miR-2478_L-2	Slc25a25:ENSRNOT00000020206
circRNA	circRNA4490	bta-miR-2478_L-2	Slc25a25:ENSRNOT00000020206
circRNA	circRNA4510	bta-miR-2478_L-2	Slc25a25:ENSRNOT00000020206
circRNA	circRNA4520	bta-miR-2478_L-2	Slc25a25:ENSRNOT00000020206
lncRNA	.:MSTRG.14147.1	bta-miR-2478_L-2	Tlr6:ENSRNOT00000002933
lncRNA	.:MSTRG.15267.1	bta-miR-2478_L-2	Tlr6:ENSRNOT00000002933
lncRNA	.:MSTRG.218.2	bta-miR-2478_L-2	Tlr6:ENSRNOT00000002933
lncRNA	.:MSTRG.22402.4	bta-miR-2478_L-2	Tlr6:ENSRNOT00000002933
lncRNA	.:MSTRG.23375.1	bta-miR-2478_L-2	Tlr6:ENSRNOT00000002933
lncRNA	.:MSTRG.28897.2	bta-miR-2478_L-2	Tlr6:ENSRNOT00000002933
lncRNA	.:MSTRG.5260.1	bta-miR-2478_L-2	Tlr6:ENSRNOT00000002933
lncRNA	.:MSTRG.9706.2	bta-miR-2478_L-2	Tlr6:ENSRNOT00000002933
lncRNA	AABR07009428:MSTRG.15407.7	bta-miR-2478_L-2	Tlr6:ENSRNOT00000002933
lncRNA	AC134224:ENSRNOT00000093096	bta-miR-2478_L-2	Tlr6:ENSRNOT00000002933
lncRNA	Bend4:MSTRG.9559.3	bta-miR-2478_L-2	Tlr6:ENSRNOT00000002933
lncRNA	Cdv3:MSTRG.28073.1	bta-miR-2478_L-2	Tlr6:ENSRNOT00000002933
lncRNA	Chtop:MSTRG.16142.1	bta-miR-2478_L-2	Tlr6:ENSRNOT00000002933
lncRNA	Clint1:MSTRG.4783.3	bta-miR-2478_L-2	Tlr6:ENSRNOT00000002933
lncRNA	Cox7a1:MSTRG.2214.2	bta-miR-2478_L-2	Tlr6:ENSRNOT00000002933
lncRNA	Crebbp:MSTRG.4516.5	bta-miR-2478_L-2	Tlr6:ENSRNOT00000002933
lncRNA	Ebf1:MSTRG.4748.3	bta-miR-2478_L-2	Tlr6:ENSRNOT00000002933
lncRNA	Kcnk12:MSTRG.23640.1	bta-miR-2478_L-2	Tlr6:ENSRNOT00000002933
lncRNA	Kcnk12:MSTRG.23640.3	bta-miR-2478_L-2	Tlr6:ENSRNOT00000002933
lncRNA	LOC689840:MSTRG.26880.1	bta-miR-2478_L-2	Tlr6:ENSRNOT00000002933
lncRNA	Mef2c:MSTRG.14762.2	bta-miR-2478_L-2	Tlr6:ENSRNOT00000002933
lncRNA	Pde6d:MSTRG.29521.2	bta-miR-2478_L-2	Tlr6:ENSRNOT00000002933
lncRNA	Pip4p2:MSTRG.21869.3	bta-miR-2478_L-2	Tlr6:ENSRNOT00000002933
lncRNA	Satb2:MSTRG.29208.2	bta-miR-2478_L-2	Tlr6:ENSRNOT00000002933
lncRNA	Tab2:MSTRG.1063.2	bta-miR-2478_L-2	Tlr6:ENSRNOT00000002933
lncRNA	Ttc28:MSTRG.8169.2	bta-miR-2478_L-2	Tlr6:ENSRNOT00000002933
lncRNA	Ttll13:MSTRG.2609.1	bta-miR-2478_L-2	Tlr6:ENSRNOT00000002933
circRNA	ciRNA166	bta-miR-2478_L-2	Tlr6:ENSRNOT00000002933
circRNA	ciRNA56	bta-miR-2478_L-2	Tlr6:ENSRNOT00000002933
circRNA	circRNA1488	bta-miR-2478_L-2	Tlr6:ENSRNOT00000002933
circRNA	circRNA1571	bta-miR-2478_L-2	Tlr6:ENSRNOT00000002933
circRNA	circRNA1578	bta-miR-2478_L-2	Tlr6:ENSRNOT00000002933
circRNA	circRNA4490	bta-miR-2478_L-2	Tlr6:ENSRNOT00000002933
circRNA	circRNA4510	bta-miR-2478_L-2	Tlr6:ENSRNOT00000002933
circRNA	circRNA4520	bta-miR-2478_L-2	Tlr6:ENSRNOT00000002933
lncRNA	.:MSTRG.14147.1	bta-miR-2478_L-2	Wnk1:ENSRNOT00000013355
lncRNA	.:MSTRG.15267.1	bta-miR-2478_L-2	Wnk1:ENSRNOT00000013355
lncRNA	.:MSTRG.218.2	bta-miR-2478_L-2	Wnk1:ENSRNOT00000013355
lncRNA	.:MSTRG.22402.4	bta-miR-2478_L-2	Wnk1:ENSRNOT00000013355
lncRNA	.:MSTRG.23375.1	bta-miR-2478_L-2	Wnk1:ENSRNOT00000013355
lncRNA	.:MSTRG.28897.2	bta-miR-2478_L-2	Wnk1:ENSRNOT00000013355
lncRNA	.:MSTRG.5260.1	bta-miR-2478_L-2	Wnk1:ENSRNOT00000013355
lncRNA	.:MSTRG.9706.2	bta-miR-2478_L-2	Wnk1:ENSRNOT00000013355
lncRNA	AABR07009428:MSTRG.15407.7	bta-miR-2478_L-2	Wnk1:ENSRNOT00000013355
lncRNA	AC134224:ENSRNOT00000093096	bta-miR-2478_L-2	Wnk1:ENSRNOT00000013355
lncRNA	Bend4:MSTRG.9559.3	bta-miR-2478_L-2	Wnk1:ENSRNOT00000013355
lncRNA	Cdv3:MSTRG.28073.1	bta-miR-2478_L-2	Wnk1:ENSRNOT00000013355
lncRNA	Chtop:MSTRG.16142.1	bta-miR-2478_L-2	Wnk1:ENSRNOT00000013355
lncRNA	Clint1:MSTRG.4783.3	bta-miR-2478_L-2	Wnk1:ENSRNOT00000013355
lncRNA	Cox7a1:MSTRG.2214.2	bta-miR-2478_L-2	Wnk1:ENSRNOT00000013355
lncRNA	Crebbp:MSTRG.4516.5	bta-miR-2478_L-2	Wnk1:ENSRNOT00000013355
lncRNA	Ebf1:MSTRG.4748.3	bta-miR-2478_L-2	Wnk1:ENSRNOT00000013355
lncRNA	Kcnk12:MSTRG.23640.1	bta-miR-2478_L-2	Wnk1:ENSRNOT00000013355
lncRNA	Kcnk12:MSTRG.23640.3	bta-miR-2478_L-2	Wnk1:ENSRNOT00000013355
lncRNA	LOC689840:MSTRG.26880.1	bta-miR-2478_L-2	Wnk1:ENSRNOT00000013355
lncRNA	Mef2c:MSTRG.14762.2	bta-miR-2478_L-2	Wnk1:ENSRNOT00000013355
lncRNA	Pde6d:MSTRG.29521.2	bta-miR-2478_L-2	Wnk1:ENSRNOT00000013355
lncRNA	Pip4p2:MSTRG.21869.3	bta-miR-2478_L-2	Wnk1:ENSRNOT00000013355
lncRNA	Satb2:MSTRG.29208.2	bta-miR-2478_L-2	Wnk1:ENSRNOT00000013355
lncRNA	Tab2:MSTRG.1063.2	bta-miR-2478_L-2	Wnk1:ENSRNOT00000013355
lncRNA	Ttc28:MSTRG.8169.2	bta-miR-2478_L-2	Wnk1:ENSRNOT00000013355
lncRNA	Ttll13:MSTRG.2609.1	bta-miR-2478_L-2	Wnk1:ENSRNOT00000013355
circRNA	ciRNA166	bta-miR-2478_L-2	Wnk1:ENSRNOT00000013355
circRNA	ciRNA56	bta-miR-2478_L-2	Wnk1:ENSRNOT00000013355
circRNA	circRNA1488	bta-miR-2478_L-2	Wnk1:ENSRNOT00000013355
circRNA	circRNA1571	bta-miR-2478_L-2	Wnk1:ENSRNOT00000013355
circRNA	circRNA1578	bta-miR-2478_L-2	Wnk1:ENSRNOT00000013355
circRNA	circRNA4490	bta-miR-2478_L-2	Wnk1:ENSRNOT00000013355
circRNA	circRNA4510	bta-miR-2478_L-2	Wnk1:ENSRNOT00000013355
circRNA	circRNA4520	bta-miR-2478_L-2	Wnk1:ENSRNOT00000013355
lncRNA	.:MSTRG.12659.1	bta-miR-4286_R+1	Anks1a:ENSRNOT00000081604
lncRNA	.:MSTRG.14147.1	bta-miR-4286_R+1	Anks1a:ENSRNOT00000081604
lncRNA	.:MSTRG.15267.1	bta-miR-4286_R+1	Anks1a:ENSRNOT00000081604
lncRNA	.:MSTRG.23375.1	bta-miR-4286_R+1	Anks1a:ENSRNOT00000081604
lncRNA	.:MSTRG.25540.1	bta-miR-4286_R+1	Anks1a:ENSRNOT00000081604
lncRNA	.:MSTRG.26886.1	bta-miR-4286_R+1	Anks1a:ENSRNOT00000081604
lncRNA	.:MSTRG.28897.2	bta-miR-4286_R+1	Anks1a:ENSRNOT00000081604
lncRNA	AABR07009428:MSTRG.15407.7	bta-miR-4286_R+1	Anks1a:ENSRNOT00000081604
lncRNA	AC099449:MSTRG.3498.102	bta-miR-4286_R+1	Anks1a:ENSRNOT00000081604
lncRNA	AC099449:MSTRG.3498.108	bta-miR-4286_R+1	Anks1a:ENSRNOT00000081604
lncRNA	AC099449:MSTRG.3498.109	bta-miR-4286_R+1	Anks1a:ENSRNOT00000081604
lncRNA	AC099449:MSTRG.3498.12	bta-miR-4286_R+1	Anks1a:ENSRNOT00000081604
lncRNA	AC099449:MSTRG.3498.125	bta-miR-4286_R+1	Anks1a:ENSRNOT00000081604
lncRNA	AC099449:MSTRG.3498.27	bta-miR-4286_R+1	Anks1a:ENSRNOT00000081604
lncRNA	AC099449:MSTRG.3498.52	bta-miR-4286_R+1	Anks1a:ENSRNOT00000081604
lncRNA	AC099449:MSTRG.3498.63	bta-miR-4286_R+1	Anks1a:ENSRNOT00000081604
lncRNA	AC099449:MSTRG.3498.65	bta-miR-4286_R+1	Anks1a:ENSRNOT00000081604
lncRNA	AC099449:MSTRG.3498.66	bta-miR-4286_R+1	Anks1a:ENSRNOT00000081604
lncRNA	AC099449:MSTRG.3498.67	bta-miR-4286_R+1	Anks1a:ENSRNOT00000081604
lncRNA	AC099449:MSTRG.3498.71	bta-miR-4286_R+1	Anks1a:ENSRNOT00000081604
lncRNA	AC099449:MSTRG.3498.74	bta-miR-4286_R+1	Anks1a:ENSRNOT00000081604
lncRNA	AC099449:MSTRG.3498.92	bta-miR-4286_R+1	Anks1a:ENSRNOT00000081604
lncRNA	Ahdc1:MSTRG.23055.1	bta-miR-4286_R+1	Anks1a:ENSRNOT00000081604
lncRNA	Bend4:MSTRG.9559.3	bta-miR-4286_R+1	Anks1a:ENSRNOT00000081604
lncRNA	Chtop:MSTRG.16142.1	bta-miR-4286_R+1	Anks1a:ENSRNOT00000081604
lncRNA	Clint1:MSTRG.4783.3	bta-miR-4286_R+1	Anks1a:ENSRNOT00000081604
lncRNA	Ebf1:MSTRG.4748.1	bta-miR-4286_R+1	Anks1a:ENSRNOT00000081604
lncRNA	Ebf1:MSTRG.4748.3	bta-miR-4286_R+1	Anks1a:ENSRNOT00000081604
lncRNA	Igf1r:MSTRG.2524.2	bta-miR-4286_R+1	Anks1a:ENSRNOT00000081604
lncRNA	LOC100910854:ENSRNOT00000083218	bta-miR-4286_R+1	Anks1a:ENSRNOT00000081604
lncRNA	LOC689840:MSTRG.26880.1	bta-miR-4286_R+1	Anks1a:ENSRNOT00000081604
lncRNA	Mark2:MSTRG.3719.1	bta-miR-4286_R+1	Anks1a:ENSRNOT00000081604
lncRNA	Nrp1:MSTRG.14677.2	bta-miR-4286_R+1	Anks1a:ENSRNOT00000081604
lncRNA	Pip4p2:MSTRG.21869.3	bta-miR-4286_R+1	Anks1a:ENSRNOT00000081604
lncRNA	Satb2:MSTRG.29208.2	bta-miR-4286_R+1	Anks1a:ENSRNOT00000081604
lncRNA	Sdhc:MSTRG.8881.1	bta-miR-4286_R+1	Anks1a:ENSRNOT00000081604
lncRNA	Zfhx3:MSTRG.14359.1	bta-miR-4286_R+1	Anks1a:ENSRNOT00000081604
circRNA	ciRNA56	bta-miR-4286_R+1	Anks1a:ENSRNOT00000081604
circRNA	circRNA1488	bta-miR-4286_R+1	Anks1a:ENSRNOT00000081604
circRNA	circRNA1571	bta-miR-4286_R+1	Anks1a:ENSRNOT00000081604
circRNA	circRNA1578	bta-miR-4286_R+1	Anks1a:ENSRNOT00000081604
circRNA	circRNA4490	bta-miR-4286_R+1	Anks1a:ENSRNOT00000081604
circRNA	circRNA4510	bta-miR-4286_R+1	Anks1a:ENSRNOT00000081604
circRNA	circRNA4520	bta-miR-4286_R+1	Anks1a:ENSRNOT00000081604
lncRNA	.:MSTRG.12659.1	bta-miR-4286_R+1	Atp6v1a:ENSRNOT00000093467
lncRNA	.:MSTRG.14147.1	bta-miR-4286_R+1	Atp6v1a:ENSRNOT00000093467
lncRNA	.:MSTRG.15267.1	bta-miR-4286_R+1	Atp6v1a:ENSRNOT00000093467
lncRNA	.:MSTRG.23375.1	bta-miR-4286_R+1	Atp6v1a:ENSRNOT00000093467
lncRNA	.:MSTRG.25540.1	bta-miR-4286_R+1	Atp6v1a:ENSRNOT00000093467
lncRNA	.:MSTRG.26886.1	bta-miR-4286_R+1	Atp6v1a:ENSRNOT00000093467
lncRNA	.:MSTRG.28897.2	bta-miR-4286_R+1	Atp6v1a:ENSRNOT00000093467
lncRNA	AABR07009428:MSTRG.15407.7	bta-miR-4286_R+1	Atp6v1a:ENSRNOT00000093467
lncRNA	AC099449:MSTRG.3498.102	bta-miR-4286_R+1	Atp6v1a:ENSRNOT00000093467
lncRNA	AC099449:MSTRG.3498.108	bta-miR-4286_R+1	Atp6v1a:ENSRNOT00000093467
lncRNA	AC099449:MSTRG.3498.109	bta-miR-4286_R+1	Atp6v1a:ENSRNOT00000093467
lncRNA	AC099449:MSTRG.3498.12	bta-miR-4286_R+1	Atp6v1a:ENSRNOT00000093467
lncRNA	AC099449:MSTRG.3498.125	bta-miR-4286_R+1	Atp6v1a:ENSRNOT00000093467
lncRNA	AC099449:MSTRG.3498.27	bta-miR-4286_R+1	Atp6v1a:ENSRNOT00000093467
lncRNA	AC099449:MSTRG.3498.52	bta-miR-4286_R+1	Atp6v1a:ENSRNOT00000093467
lncRNA	AC099449:MSTRG.3498.63	bta-miR-4286_R+1	Atp6v1a:ENSRNOT00000093467
lncRNA	AC099449:MSTRG.3498.65	bta-miR-4286_R+1	Atp6v1a:ENSRNOT00000093467
lncRNA	AC099449:MSTRG.3498.66	bta-miR-4286_R+1	Atp6v1a:ENSRNOT00000093467
lncRNA	AC099449:MSTRG.3498.67	bta-miR-4286_R+1	Atp6v1a:ENSRNOT00000093467
lncRNA	AC099449:MSTRG.3498.71	bta-miR-4286_R+1	Atp6v1a:ENSRNOT00000093467
lncRNA	AC099449:MSTRG.3498.74	bta-miR-4286_R+1	Atp6v1a:ENSRNOT00000093467
lncRNA	AC099449:MSTRG.3498.92	bta-miR-4286_R+1	Atp6v1a:ENSRNOT00000093467
lncRNA	Ahdc1:MSTRG.23055.1	bta-miR-4286_R+1	Atp6v1a:ENSRNOT00000093467
lncRNA	Bend4:MSTRG.9559.3	bta-miR-4286_R+1	Atp6v1a:ENSRNOT00000093467
lncRNA	Chtop:MSTRG.16142.1	bta-miR-4286_R+1	Atp6v1a:ENSRNOT00000093467
lncRNA	Clint1:MSTRG.4783.3	bta-miR-4286_R+1	Atp6v1a:ENSRNOT00000093467
lncRNA	Ebf1:MSTRG.4748.1	bta-miR-4286_R+1	Atp6v1a:ENSRNOT00000093467
lncRNA	Ebf1:MSTRG.4748.3	bta-miR-4286_R+1	Atp6v1a:ENSRNOT00000093467
lncRNA	Igf1r:MSTRG.2524.2	bta-miR-4286_R+1	Atp6v1a:ENSRNOT00000093467
lncRNA	LOC100910854:ENSRNOT00000083218	bta-miR-4286_R+1	Atp6v1a:ENSRNOT00000093467
lncRNA	LOC689840:MSTRG.26880.1	bta-miR-4286_R+1	Atp6v1a:ENSRNOT00000093467
lncRNA	Mark2:MSTRG.3719.1	bta-miR-4286_R+1	Atp6v1a:ENSRNOT00000093467
lncRNA	Nrp1:MSTRG.14677.2	bta-miR-4286_R+1	Atp6v1a:ENSRNOT00000093467
lncRNA	Pip4p2:MSTRG.21869.3	bta-miR-4286_R+1	Atp6v1a:ENSRNOT00000093467
lncRNA	Satb2:MSTRG.29208.2	bta-miR-4286_R+1	Atp6v1a:ENSRNOT00000093467
lncRNA	Sdhc:MSTRG.8881.1	bta-miR-4286_R+1	Atp6v1a:ENSRNOT00000093467
lncRNA	Zfhx3:MSTRG.14359.1	bta-miR-4286_R+1	Atp6v1a:ENSRNOT00000093467
circRNA	ciRNA56	bta-miR-4286_R+1	Atp6v1a:ENSRNOT00000093467
circRNA	circRNA1488	bta-miR-4286_R+1	Atp6v1a:ENSRNOT00000093467
circRNA	circRNA1571	bta-miR-4286_R+1	Atp6v1a:ENSRNOT00000093467
circRNA	circRNA1578	bta-miR-4286_R+1	Atp6v1a:ENSRNOT00000093467
circRNA	circRNA4490	bta-miR-4286_R+1	Atp6v1a:ENSRNOT00000093467
circRNA	circRNA4510	bta-miR-4286_R+1	Atp6v1a:ENSRNOT00000093467
circRNA	circRNA4520	bta-miR-4286_R+1	Atp6v1a:ENSRNOT00000093467
lncRNA	.:MSTRG.12659.1	bta-miR-4286_R+1	Birc2:ENSRNOT00000014560
lncRNA	.:MSTRG.14147.1	bta-miR-4286_R+1	Birc2:ENSRNOT00000014560
lncRNA	.:MSTRG.15267.1	bta-miR-4286_R+1	Birc2:ENSRNOT00000014560
lncRNA	.:MSTRG.23375.1	bta-miR-4286_R+1	Birc2:ENSRNOT00000014560
lncRNA	.:MSTRG.25540.1	bta-miR-4286_R+1	Birc2:ENSRNOT00000014560
lncRNA	.:MSTRG.26886.1	bta-miR-4286_R+1	Birc2:ENSRNOT00000014560
lncRNA	.:MSTRG.28897.2	bta-miR-4286_R+1	Birc2:ENSRNOT00000014560
lncRNA	AABR07009428:MSTRG.15407.7	bta-miR-4286_R+1	Birc2:ENSRNOT00000014560
lncRNA	AC099449:MSTRG.3498.102	bta-miR-4286_R+1	Birc2:ENSRNOT00000014560
lncRNA	AC099449:MSTRG.3498.108	bta-miR-4286_R+1	Birc2:ENSRNOT00000014560
lncRNA	AC099449:MSTRG.3498.109	bta-miR-4286_R+1	Birc2:ENSRNOT00000014560
lncRNA	AC099449:MSTRG.3498.12	bta-miR-4286_R+1	Birc2:ENSRNOT00000014560
lncRNA	AC099449:MSTRG.3498.125	bta-miR-4286_R+1	Birc2:ENSRNOT00000014560
lncRNA	AC099449:MSTRG.3498.27	bta-miR-4286_R+1	Birc2:ENSRNOT00000014560
lncRNA	AC099449:MSTRG.3498.52	bta-miR-4286_R+1	Birc2:ENSRNOT00000014560
lncRNA	AC099449:MSTRG.3498.63	bta-miR-4286_R+1	Birc2:ENSRNOT00000014560
lncRNA	AC099449:MSTRG.3498.65	bta-miR-4286_R+1	Birc2:ENSRNOT00000014560
lncRNA	AC099449:MSTRG.3498.66	bta-miR-4286_R+1	Birc2:ENSRNOT00000014560
lncRNA	AC099449:MSTRG.3498.67	bta-miR-4286_R+1	Birc2:ENSRNOT00000014560
lncRNA	AC099449:MSTRG.3498.71	bta-miR-4286_R+1	Birc2:ENSRNOT00000014560
lncRNA	AC099449:MSTRG.3498.74	bta-miR-4286_R+1	Birc2:ENSRNOT00000014560
lncRNA	AC099449:MSTRG.3498.92	bta-miR-4286_R+1	Birc2:ENSRNOT00000014560
lncRNA	Ahdc1:MSTRG.23055.1	bta-miR-4286_R+1	Birc2:ENSRNOT00000014560
lncRNA	Bend4:MSTRG.9559.3	bta-miR-4286_R+1	Birc2:ENSRNOT00000014560
lncRNA	Chtop:MSTRG.16142.1	bta-miR-4286_R+1	Birc2:ENSRNOT00000014560
lncRNA	Clint1:MSTRG.4783.3	bta-miR-4286_R+1	Birc2:ENSRNOT00000014560
lncRNA	Ebf1:MSTRG.4748.1	bta-miR-4286_R+1	Birc2:ENSRNOT00000014560
lncRNA	Ebf1:MSTRG.4748.3	bta-miR-4286_R+1	Birc2:ENSRNOT00000014560
lncRNA	Igf1r:MSTRG.2524.2	bta-miR-4286_R+1	Birc2:ENSRNOT00000014560
lncRNA	LOC100910854:ENSRNOT00000083218	bta-miR-4286_R+1	Birc2:ENSRNOT00000014560
lncRNA	LOC689840:MSTRG.26880.1	bta-miR-4286_R+1	Birc2:ENSRNOT00000014560
lncRNA	Mark2:MSTRG.3719.1	bta-miR-4286_R+1	Birc2:ENSRNOT00000014560
lncRNA	Nrp1:MSTRG.14677.2	bta-miR-4286_R+1	Birc2:ENSRNOT00000014560
lncRNA	Pip4p2:MSTRG.21869.3	bta-miR-4286_R+1	Birc2:ENSRNOT00000014560
lncRNA	Satb2:MSTRG.29208.2	bta-miR-4286_R+1	Birc2:ENSRNOT00000014560
lncRNA	Sdhc:MSTRG.8881.1	bta-miR-4286_R+1	Birc2:ENSRNOT00000014560
lncRNA	Zfhx3:MSTRG.14359.1	bta-miR-4286_R+1	Birc2:ENSRNOT00000014560
circRNA	ciRNA56	bta-miR-4286_R+1	Birc2:ENSRNOT00000014560
circRNA	circRNA1488	bta-miR-4286_R+1	Birc2:ENSRNOT00000014560
circRNA	circRNA1571	bta-miR-4286_R+1	Birc2:ENSRNOT00000014560
circRNA	circRNA1578	bta-miR-4286_R+1	Birc2:ENSRNOT00000014560
circRNA	circRNA4490	bta-miR-4286_R+1	Birc2:ENSRNOT00000014560
circRNA	circRNA4510	bta-miR-4286_R+1	Birc2:ENSRNOT00000014560
circRNA	circRNA4520	bta-miR-4286_R+1	Birc2:ENSRNOT00000014560
lncRNA	.:MSTRG.12659.1	bta-miR-4286_R+1	Camsap2:ENSRNOT00000060410
lncRNA	.:MSTRG.14147.1	bta-miR-4286_R+1	Camsap2:ENSRNOT00000060410
lncRNA	.:MSTRG.15267.1	bta-miR-4286_R+1	Camsap2:ENSRNOT00000060410
lncRNA	.:MSTRG.23375.1	bta-miR-4286_R+1	Camsap2:ENSRNOT00000060410
lncRNA	.:MSTRG.25540.1	bta-miR-4286_R+1	Camsap2:ENSRNOT00000060410
lncRNA	.:MSTRG.26886.1	bta-miR-4286_R+1	Camsap2:ENSRNOT00000060410
lncRNA	.:MSTRG.28897.2	bta-miR-4286_R+1	Camsap2:ENSRNOT00000060410
lncRNA	AABR07009428:MSTRG.15407.7	bta-miR-4286_R+1	Camsap2:ENSRNOT00000060410
lncRNA	AC099449:MSTRG.3498.102	bta-miR-4286_R+1	Camsap2:ENSRNOT00000060410
lncRNA	AC099449:MSTRG.3498.108	bta-miR-4286_R+1	Camsap2:ENSRNOT00000060410
lncRNA	AC099449:MSTRG.3498.109	bta-miR-4286_R+1	Camsap2:ENSRNOT00000060410
lncRNA	AC099449:MSTRG.3498.12	bta-miR-4286_R+1	Camsap2:ENSRNOT00000060410
lncRNA	AC099449:MSTRG.3498.125	bta-miR-4286_R+1	Camsap2:ENSRNOT00000060410
lncRNA	AC099449:MSTRG.3498.27	bta-miR-4286_R+1	Camsap2:ENSRNOT00000060410
lncRNA	AC099449:MSTRG.3498.52	bta-miR-4286_R+1	Camsap2:ENSRNOT00000060410
lncRNA	AC099449:MSTRG.3498.63	bta-miR-4286_R+1	Camsap2:ENSRNOT00000060410
lncRNA	AC099449:MSTRG.3498.65	bta-miR-4286_R+1	Camsap2:ENSRNOT00000060410
lncRNA	AC099449:MSTRG.3498.66	bta-miR-4286_R+1	Camsap2:ENSRNOT00000060410
lncRNA	AC099449:MSTRG.3498.67	bta-miR-4286_R+1	Camsap2:ENSRNOT00000060410
lncRNA	AC099449:MSTRG.3498.71	bta-miR-4286_R+1	Camsap2:ENSRNOT00000060410
lncRNA	AC099449:MSTRG.3498.74	bta-miR-4286_R+1	Camsap2:ENSRNOT00000060410
lncRNA	AC099449:MSTRG.3498.92	bta-miR-4286_R+1	Camsap2:ENSRNOT00000060410
lncRNA	Ahdc1:MSTRG.23055.1	bta-miR-4286_R+1	Camsap2:ENSRNOT00000060410
lncRNA	Bend4:MSTRG.9559.3	bta-miR-4286_R+1	Camsap2:ENSRNOT00000060410
lncRNA	Chtop:MSTRG.16142.1	bta-miR-4286_R+1	Camsap2:ENSRNOT00000060410
lncRNA	Clint1:MSTRG.4783.3	bta-miR-4286_R+1	Camsap2:ENSRNOT00000060410
lncRNA	Ebf1:MSTRG.4748.1	bta-miR-4286_R+1	Camsap2:ENSRNOT00000060410
lncRNA	Ebf1:MSTRG.4748.3	bta-miR-4286_R+1	Camsap2:ENSRNOT00000060410
lncRNA	Igf1r:MSTRG.2524.2	bta-miR-4286_R+1	Camsap2:ENSRNOT00000060410
lncRNA	LOC100910854:ENSRNOT00000083218	bta-miR-4286_R+1	Camsap2:ENSRNOT00000060410
lncRNA	LOC689840:MSTRG.26880.1	bta-miR-4286_R+1	Camsap2:ENSRNOT00000060410
lncRNA	Mark2:MSTRG.3719.1	bta-miR-4286_R+1	Camsap2:ENSRNOT00000060410
lncRNA	Nrp1:MSTRG.14677.2	bta-miR-4286_R+1	Camsap2:ENSRNOT00000060410
lncRNA	Pip4p2:MSTRG.21869.3	bta-miR-4286_R+1	Camsap2:ENSRNOT00000060410
lncRNA	Satb2:MSTRG.29208.2	bta-miR-4286_R+1	Camsap2:ENSRNOT00000060410
lncRNA	Sdhc:MSTRG.8881.1	bta-miR-4286_R+1	Camsap2:ENSRNOT00000060410
lncRNA	Zfhx3:MSTRG.14359.1	bta-miR-4286_R+1	Camsap2:ENSRNOT00000060410
circRNA	ciRNA56	bta-miR-4286_R+1	Camsap2:ENSRNOT00000060410
circRNA	circRNA1488	bta-miR-4286_R+1	Camsap2:ENSRNOT00000060410
circRNA	circRNA1571	bta-miR-4286_R+1	Camsap2:ENSRNOT00000060410
circRNA	circRNA1578	bta-miR-4286_R+1	Camsap2:ENSRNOT00000060410
circRNA	circRNA4490	bta-miR-4286_R+1	Camsap2:ENSRNOT00000060410
circRNA	circRNA4510	bta-miR-4286_R+1	Camsap2:ENSRNOT00000060410
circRNA	circRNA4520	bta-miR-4286_R+1	Camsap2:ENSRNOT00000060410
lncRNA	.:MSTRG.12659.1	bta-miR-4286_R+1	Coro6:ENSRNOT00000019759
lncRNA	.:MSTRG.14147.1	bta-miR-4286_R+1	Coro6:ENSRNOT00000019759
lncRNA	.:MSTRG.15267.1	bta-miR-4286_R+1	Coro6:ENSRNOT00000019759
lncRNA	.:MSTRG.23375.1	bta-miR-4286_R+1	Coro6:ENSRNOT00000019759
lncRNA	.:MSTRG.25540.1	bta-miR-4286_R+1	Coro6:ENSRNOT00000019759
lncRNA	.:MSTRG.26886.1	bta-miR-4286_R+1	Coro6:ENSRNOT00000019759
lncRNA	.:MSTRG.28897.2	bta-miR-4286_R+1	Coro6:ENSRNOT00000019759
lncRNA	AABR07009428:MSTRG.15407.7	bta-miR-4286_R+1	Coro6:ENSRNOT00000019759
lncRNA	AC099449:MSTRG.3498.102	bta-miR-4286_R+1	Coro6:ENSRNOT00000019759
lncRNA	AC099449:MSTRG.3498.108	bta-miR-4286_R+1	Coro6:ENSRNOT00000019759
lncRNA	AC099449:MSTRG.3498.109	bta-miR-4286_R+1	Coro6:ENSRNOT00000019759
lncRNA	AC099449:MSTRG.3498.12	bta-miR-4286_R+1	Coro6:ENSRNOT00000019759
lncRNA	AC099449:MSTRG.3498.125	bta-miR-4286_R+1	Coro6:ENSRNOT00000019759
lncRNA	AC099449:MSTRG.3498.27	bta-miR-4286_R+1	Coro6:ENSRNOT00000019759
lncRNA	AC099449:MSTRG.3498.52	bta-miR-4286_R+1	Coro6:ENSRNOT00000019759
lncRNA	AC099449:MSTRG.3498.63	bta-miR-4286_R+1	Coro6:ENSRNOT00000019759
lncRNA	AC099449:MSTRG.3498.65	bta-miR-4286_R+1	Coro6:ENSRNOT00000019759
lncRNA	AC099449:MSTRG.3498.66	bta-miR-4286_R+1	Coro6:ENSRNOT00000019759
lncRNA	AC099449:MSTRG.3498.67	bta-miR-4286_R+1	Coro6:ENSRNOT00000019759
lncRNA	AC099449:MSTRG.3498.71	bta-miR-4286_R+1	Coro6:ENSRNOT00000019759
lncRNA	AC099449:MSTRG.3498.74	bta-miR-4286_R+1	Coro6:ENSRNOT00000019759
lncRNA	AC099449:MSTRG.3498.92	bta-miR-4286_R+1	Coro6:ENSRNOT00000019759
lncRNA	Ahdc1:MSTRG.23055.1	bta-miR-4286_R+1	Coro6:ENSRNOT00000019759
lncRNA	Bend4:MSTRG.9559.3	bta-miR-4286_R+1	Coro6:ENSRNOT00000019759
lncRNA	Chtop:MSTRG.16142.1	bta-miR-4286_R+1	Coro6:ENSRNOT00000019759
lncRNA	Clint1:MSTRG.4783.3	bta-miR-4286_R+1	Coro6:ENSRNOT00000019759
lncRNA	Ebf1:MSTRG.4748.1	bta-miR-4286_R+1	Coro6:ENSRNOT00000019759
lncRNA	Ebf1:MSTRG.4748.3	bta-miR-4286_R+1	Coro6:ENSRNOT00000019759
lncRNA	Igf1r:MSTRG.2524.2	bta-miR-4286_R+1	Coro6:ENSRNOT00000019759
lncRNA	LOC100910854:ENSRNOT00000083218	bta-miR-4286_R+1	Coro6:ENSRNOT00000019759
lncRNA	LOC689840:MSTRG.26880.1	bta-miR-4286_R+1	Coro6:ENSRNOT00000019759
lncRNA	Mark2:MSTRG.3719.1	bta-miR-4286_R+1	Coro6:ENSRNOT00000019759
lncRNA	Nrp1:MSTRG.14677.2	bta-miR-4286_R+1	Coro6:ENSRNOT00000019759
lncRNA	Pip4p2:MSTRG.21869.3	bta-miR-4286_R+1	Coro6:ENSRNOT00000019759
lncRNA	Satb2:MSTRG.29208.2	bta-miR-4286_R+1	Coro6:ENSRNOT00000019759
lncRNA	Sdhc:MSTRG.8881.1	bta-miR-4286_R+1	Coro6:ENSRNOT00000019759
lncRNA	Zfhx3:MSTRG.14359.1	bta-miR-4286_R+1	Coro6:ENSRNOT00000019759
circRNA	ciRNA56	bta-miR-4286_R+1	Coro6:ENSRNOT00000019759
circRNA	circRNA1488	bta-miR-4286_R+1	Coro6:ENSRNOT00000019759
circRNA	circRNA1571	bta-miR-4286_R+1	Coro6:ENSRNOT00000019759
circRNA	circRNA1578	bta-miR-4286_R+1	Coro6:ENSRNOT00000019759
circRNA	circRNA4490	bta-miR-4286_R+1	Coro6:ENSRNOT00000019759
circRNA	circRNA4510	bta-miR-4286_R+1	Coro6:ENSRNOT00000019759
circRNA	circRNA4520	bta-miR-4286_R+1	Coro6:ENSRNOT00000019759
lncRNA	.:MSTRG.12659.1	bta-miR-4286_R+1	Dag1:ENSRNOT00000026327
lncRNA	.:MSTRG.14147.1	bta-miR-4286_R+1	Dag1:ENSRNOT00000026327
lncRNA	.:MSTRG.15267.1	bta-miR-4286_R+1	Dag1:ENSRNOT00000026327
lncRNA	.:MSTRG.23375.1	bta-miR-4286_R+1	Dag1:ENSRNOT00000026327
lncRNA	.:MSTRG.25540.1	bta-miR-4286_R+1	Dag1:ENSRNOT00000026327
lncRNA	.:MSTRG.26886.1	bta-miR-4286_R+1	Dag1:ENSRNOT00000026327
lncRNA	.:MSTRG.28897.2	bta-miR-4286_R+1	Dag1:ENSRNOT00000026327
lncRNA	AABR07009428:MSTRG.15407.7	bta-miR-4286_R+1	Dag1:ENSRNOT00000026327
lncRNA	AC099449:MSTRG.3498.102	bta-miR-4286_R+1	Dag1:ENSRNOT00000026327
lncRNA	AC099449:MSTRG.3498.108	bta-miR-4286_R+1	Dag1:ENSRNOT00000026327
lncRNA	AC099449:MSTRG.3498.109	bta-miR-4286_R+1	Dag1:ENSRNOT00000026327
lncRNA	AC099449:MSTRG.3498.12	bta-miR-4286_R+1	Dag1:ENSRNOT00000026327
lncRNA	AC099449:MSTRG.3498.125	bta-miR-4286_R+1	Dag1:ENSRNOT00000026327
lncRNA	AC099449:MSTRG.3498.27	bta-miR-4286_R+1	Dag1:ENSRNOT00000026327
lncRNA	AC099449:MSTRG.3498.52	bta-miR-4286_R+1	Dag1:ENSRNOT00000026327
lncRNA	AC099449:MSTRG.3498.63	bta-miR-4286_R+1	Dag1:ENSRNOT00000026327
lncRNA	AC099449:MSTRG.3498.65	bta-miR-4286_R+1	Dag1:ENSRNOT00000026327
lncRNA	AC099449:MSTRG.3498.66	bta-miR-4286_R+1	Dag1:ENSRNOT00000026327
lncRNA	AC099449:MSTRG.3498.67	bta-miR-4286_R+1	Dag1:ENSRNOT00000026327
lncRNA	AC099449:MSTRG.3498.71	bta-miR-4286_R+1	Dag1:ENSRNOT00000026327
lncRNA	AC099449:MSTRG.3498.74	bta-miR-4286_R+1	Dag1:ENSRNOT00000026327
lncRNA	AC099449:MSTRG.3498.92	bta-miR-4286_R+1	Dag1:ENSRNOT00000026327
lncRNA	Ahdc1:MSTRG.23055.1	bta-miR-4286_R+1	Dag1:ENSRNOT00000026327
lncRNA	Bend4:MSTRG.9559.3	bta-miR-4286_R+1	Dag1:ENSRNOT00000026327
lncRNA	Chtop:MSTRG.16142.1	bta-miR-4286_R+1	Dag1:ENSRNOT00000026327
lncRNA	Clint1:MSTRG.4783.3	bta-miR-4286_R+1	Dag1:ENSRNOT00000026327
lncRNA	Ebf1:MSTRG.4748.1	bta-miR-4286_R+1	Dag1:ENSRNOT00000026327
lncRNA	Ebf1:MSTRG.4748.3	bta-miR-4286_R+1	Dag1:ENSRNOT00000026327
lncRNA	Igf1r:MSTRG.2524.2	bta-miR-4286_R+1	Dag1:ENSRNOT00000026327
lncRNA	LOC100910854:ENSRNOT00000083218	bta-miR-4286_R+1	Dag1:ENSRNOT00000026327
lncRNA	LOC689840:MSTRG.26880.1	bta-miR-4286_R+1	Dag1:ENSRNOT00000026327
lncRNA	Mark2:MSTRG.3719.1	bta-miR-4286_R+1	Dag1:ENSRNOT00000026327
lncRNA	Nrp1:MSTRG.14677.2	bta-miR-4286_R+1	Dag1:ENSRNOT00000026327
lncRNA	Pip4p2:MSTRG.21869.3	bta-miR-4286_R+1	Dag1:ENSRNOT00000026327
lncRNA	Satb2:MSTRG.29208.2	bta-miR-4286_R+1	Dag1:ENSRNOT00000026327
lncRNA	Sdhc:MSTRG.8881.1	bta-miR-4286_R+1	Dag1:ENSRNOT00000026327
lncRNA	Zfhx3:MSTRG.14359.1	bta-miR-4286_R+1	Dag1:ENSRNOT00000026327
circRNA	ciRNA56	bta-miR-4286_R+1	Dag1:ENSRNOT00000026327
circRNA	circRNA1488	bta-miR-4286_R+1	Dag1:ENSRNOT00000026327
circRNA	circRNA1571	bta-miR-4286_R+1	Dag1:ENSRNOT00000026327
circRNA	circRNA1578	bta-miR-4286_R+1	Dag1:ENSRNOT00000026327
circRNA	circRNA4490	bta-miR-4286_R+1	Dag1:ENSRNOT00000026327
circRNA	circRNA4510	bta-miR-4286_R+1	Dag1:ENSRNOT00000026327
circRNA	circRNA4520	bta-miR-4286_R+1	Dag1:ENSRNOT00000026327
lncRNA	.:MSTRG.12659.1	bta-miR-4286_R+1	Ddi2:ENSRNOT00000076160
lncRNA	.:MSTRG.14147.1	bta-miR-4286_R+1	Ddi2:ENSRNOT00000076160
lncRNA	.:MSTRG.15267.1	bta-miR-4286_R+1	Ddi2:ENSRNOT00000076160
lncRNA	.:MSTRG.23375.1	bta-miR-4286_R+1	Ddi2:ENSRNOT00000076160
lncRNA	.:MSTRG.25540.1	bta-miR-4286_R+1	Ddi2:ENSRNOT00000076160
lncRNA	.:MSTRG.26886.1	bta-miR-4286_R+1	Ddi2:ENSRNOT00000076160
lncRNA	.:MSTRG.28897.2	bta-miR-4286_R+1	Ddi2:ENSRNOT00000076160
lncRNA	AABR07009428:MSTRG.15407.7	bta-miR-4286_R+1	Ddi2:ENSRNOT00000076160
lncRNA	AC099449:MSTRG.3498.102	bta-miR-4286_R+1	Ddi2:ENSRNOT00000076160
lncRNA	AC099449:MSTRG.3498.108	bta-miR-4286_R+1	Ddi2:ENSRNOT00000076160
lncRNA	AC099449:MSTRG.3498.109	bta-miR-4286_R+1	Ddi2:ENSRNOT00000076160
lncRNA	AC099449:MSTRG.3498.12	bta-miR-4286_R+1	Ddi2:ENSRNOT00000076160
lncRNA	AC099449:MSTRG.3498.125	bta-miR-4286_R+1	Ddi2:ENSRNOT00000076160
lncRNA	AC099449:MSTRG.3498.27	bta-miR-4286_R+1	Ddi2:ENSRNOT00000076160
lncRNA	AC099449:MSTRG.3498.52	bta-miR-4286_R+1	Ddi2:ENSRNOT00000076160
lncRNA	AC099449:MSTRG.3498.63	bta-miR-4286_R+1	Ddi2:ENSRNOT00000076160
lncRNA	AC099449:MSTRG.3498.65	bta-miR-4286_R+1	Ddi2:ENSRNOT00000076160
lncRNA	AC099449:MSTRG.3498.66	bta-miR-4286_R+1	Ddi2:ENSRNOT00000076160
lncRNA	AC099449:MSTRG.3498.67	bta-miR-4286_R+1	Ddi2:ENSRNOT00000076160
lncRNA	AC099449:MSTRG.3498.71	bta-miR-4286_R+1	Ddi2:ENSRNOT00000076160
lncRNA	AC099449:MSTRG.3498.74	bta-miR-4286_R+1	Ddi2:ENSRNOT00000076160
lncRNA	AC099449:MSTRG.3498.92	bta-miR-4286_R+1	Ddi2:ENSRNOT00000076160
lncRNA	Ahdc1:MSTRG.23055.1	bta-miR-4286_R+1	Ddi2:ENSRNOT00000076160
lncRNA	Bend4:MSTRG.9559.3	bta-miR-4286_R+1	Ddi2:ENSRNOT00000076160
lncRNA	Chtop:MSTRG.16142.1	bta-miR-4286_R+1	Ddi2:ENSRNOT00000076160
lncRNA	Clint1:MSTRG.4783.3	bta-miR-4286_R+1	Ddi2:ENSRNOT00000076160
lncRNA	Ebf1:MSTRG.4748.1	bta-miR-4286_R+1	Ddi2:ENSRNOT00000076160
lncRNA	Ebf1:MSTRG.4748.3	bta-miR-4286_R+1	Ddi2:ENSRNOT00000076160
lncRNA	Igf1r:MSTRG.2524.2	bta-miR-4286_R+1	Ddi2:ENSRNOT00000076160
lncRNA	LOC100910854:ENSRNOT00000083218	bta-miR-4286_R+1	Ddi2:ENSRNOT00000076160
lncRNA	LOC689840:MSTRG.26880.1	bta-miR-4286_R+1	Ddi2:ENSRNOT00000076160
lncRNA	Mark2:MSTRG.3719.1	bta-miR-4286_R+1	Ddi2:ENSRNOT00000076160
lncRNA	Nrp1:MSTRG.14677.2	bta-miR-4286_R+1	Ddi2:ENSRNOT00000076160
lncRNA	Pip4p2:MSTRG.21869.3	bta-miR-4286_R+1	Ddi2:ENSRNOT00000076160
lncRNA	Satb2:MSTRG.29208.2	bta-miR-4286_R+1	Ddi2:ENSRNOT00000076160
lncRNA	Sdhc:MSTRG.8881.1	bta-miR-4286_R+1	Ddi2:ENSRNOT00000076160
lncRNA	Zfhx3:MSTRG.14359.1	bta-miR-4286_R+1	Ddi2:ENSRNOT00000076160
circRNA	ciRNA56	bta-miR-4286_R+1	Ddi2:ENSRNOT00000076160
circRNA	circRNA1488	bta-miR-4286_R+1	Ddi2:ENSRNOT00000076160
circRNA	circRNA1571	bta-miR-4286_R+1	Ddi2:ENSRNOT00000076160
circRNA	circRNA1578	bta-miR-4286_R+1	Ddi2:ENSRNOT00000076160
circRNA	circRNA4490	bta-miR-4286_R+1	Ddi2:ENSRNOT00000076160
circRNA	circRNA4510	bta-miR-4286_R+1	Ddi2:ENSRNOT00000076160
circRNA	circRNA4520	bta-miR-4286_R+1	Ddi2:ENSRNOT00000076160
lncRNA	.:MSTRG.12659.1	bta-miR-4286_R+1	Dnmt3a:ENSRNOT00000047210
lncRNA	.:MSTRG.14147.1	bta-miR-4286_R+1	Dnmt3a:ENSRNOT00000047210
lncRNA	.:MSTRG.15267.1	bta-miR-4286_R+1	Dnmt3a:ENSRNOT00000047210
lncRNA	.:MSTRG.23375.1	bta-miR-4286_R+1	Dnmt3a:ENSRNOT00000047210
lncRNA	.:MSTRG.25540.1	bta-miR-4286_R+1	Dnmt3a:ENSRNOT00000047210
lncRNA	.:MSTRG.26886.1	bta-miR-4286_R+1	Dnmt3a:ENSRNOT00000047210
lncRNA	.:MSTRG.28897.2	bta-miR-4286_R+1	Dnmt3a:ENSRNOT00000047210
lncRNA	AABR07009428:MSTRG.15407.7	bta-miR-4286_R+1	Dnmt3a:ENSRNOT00000047210
lncRNA	AC099449:MSTRG.3498.102	bta-miR-4286_R+1	Dnmt3a:ENSRNOT00000047210
lncRNA	AC099449:MSTRG.3498.108	bta-miR-4286_R+1	Dnmt3a:ENSRNOT00000047210
lncRNA	AC099449:MSTRG.3498.109	bta-miR-4286_R+1	Dnmt3a:ENSRNOT00000047210
lncRNA	AC099449:MSTRG.3498.12	bta-miR-4286_R+1	Dnmt3a:ENSRNOT00000047210
lncRNA	AC099449:MSTRG.3498.125	bta-miR-4286_R+1	Dnmt3a:ENSRNOT00000047210
lncRNA	AC099449:MSTRG.3498.27	bta-miR-4286_R+1	Dnmt3a:ENSRNOT00000047210
lncRNA	AC099449:MSTRG.3498.52	bta-miR-4286_R+1	Dnmt3a:ENSRNOT00000047210
lncRNA	AC099449:MSTRG.3498.63	bta-miR-4286_R+1	Dnmt3a:ENSRNOT00000047210
lncRNA	AC099449:MSTRG.3498.65	bta-miR-4286_R+1	Dnmt3a:ENSRNOT00000047210
lncRNA	AC099449:MSTRG.3498.66	bta-miR-4286_R+1	Dnmt3a:ENSRNOT00000047210
lncRNA	AC099449:MSTRG.3498.67	bta-miR-4286_R+1	Dnmt3a:ENSRNOT00000047210
lncRNA	AC099449:MSTRG.3498.71	bta-miR-4286_R+1	Dnmt3a:ENSRNOT00000047210
lncRNA	AC099449:MSTRG.3498.74	bta-miR-4286_R+1	Dnmt3a:ENSRNOT00000047210
lncRNA	AC099449:MSTRG.3498.92	bta-miR-4286_R+1	Dnmt3a:ENSRNOT00000047210
lncRNA	Ahdc1:MSTRG.23055.1	bta-miR-4286_R+1	Dnmt3a:ENSRNOT00000047210
lncRNA	Bend4:MSTRG.9559.3	bta-miR-4286_R+1	Dnmt3a:ENSRNOT00000047210
lncRNA	Chtop:MSTRG.16142.1	bta-miR-4286_R+1	Dnmt3a:ENSRNOT00000047210
lncRNA	Clint1:MSTRG.4783.3	bta-miR-4286_R+1	Dnmt3a:ENSRNOT00000047210
lncRNA	Ebf1:MSTRG.4748.1	bta-miR-4286_R+1	Dnmt3a:ENSRNOT00000047210
lncRNA	Ebf1:MSTRG.4748.3	bta-miR-4286_R+1	Dnmt3a:ENSRNOT00000047210
lncRNA	Igf1r:MSTRG.2524.2	bta-miR-4286_R+1	Dnmt3a:ENSRNOT00000047210
lncRNA	LOC100910854:ENSRNOT00000083218	bta-miR-4286_R+1	Dnmt3a:ENSRNOT00000047210
lncRNA	LOC689840:MSTRG.26880.1	bta-miR-4286_R+1	Dnmt3a:ENSRNOT00000047210
lncRNA	Mark2:MSTRG.3719.1	bta-miR-4286_R+1	Dnmt3a:ENSRNOT00000047210
lncRNA	Nrp1:MSTRG.14677.2	bta-miR-4286_R+1	Dnmt3a:ENSRNOT00000047210
lncRNA	Pip4p2:MSTRG.21869.3	bta-miR-4286_R+1	Dnmt3a:ENSRNOT00000047210
lncRNA	Satb2:MSTRG.29208.2	bta-miR-4286_R+1	Dnmt3a:ENSRNOT00000047210
lncRNA	Sdhc:MSTRG.8881.1	bta-miR-4286_R+1	Dnmt3a:ENSRNOT00000047210
lncRNA	Zfhx3:MSTRG.14359.1	bta-miR-4286_R+1	Dnmt3a:ENSRNOT00000047210
circRNA	ciRNA56	bta-miR-4286_R+1	Dnmt3a:ENSRNOT00000047210
circRNA	circRNA1488	bta-miR-4286_R+1	Dnmt3a:ENSRNOT00000047210
circRNA	circRNA1571	bta-miR-4286_R+1	Dnmt3a:ENSRNOT00000047210
circRNA	circRNA1578	bta-miR-4286_R+1	Dnmt3a:ENSRNOT00000047210
circRNA	circRNA4490	bta-miR-4286_R+1	Dnmt3a:ENSRNOT00000047210
circRNA	circRNA4510	bta-miR-4286_R+1	Dnmt3a:ENSRNOT00000047210
circRNA	circRNA4520	bta-miR-4286_R+1	Dnmt3a:ENSRNOT00000047210
lncRNA	.:MSTRG.12659.1	bta-miR-4286_R+1	Dock9:ENSRNOT00000064705
lncRNA	.:MSTRG.14147.1	bta-miR-4286_R+1	Dock9:ENSRNOT00000064705
lncRNA	.:MSTRG.15267.1	bta-miR-4286_R+1	Dock9:ENSRNOT00000064705
lncRNA	.:MSTRG.23375.1	bta-miR-4286_R+1	Dock9:ENSRNOT00000064705
lncRNA	.:MSTRG.25540.1	bta-miR-4286_R+1	Dock9:ENSRNOT00000064705
lncRNA	.:MSTRG.26886.1	bta-miR-4286_R+1	Dock9:ENSRNOT00000064705
lncRNA	.:MSTRG.28897.2	bta-miR-4286_R+1	Dock9:ENSRNOT00000064705
lncRNA	AABR07009428:MSTRG.15407.7	bta-miR-4286_R+1	Dock9:ENSRNOT00000064705
lncRNA	AC099449:MSTRG.3498.102	bta-miR-4286_R+1	Dock9:ENSRNOT00000064705
lncRNA	AC099449:MSTRG.3498.108	bta-miR-4286_R+1	Dock9:ENSRNOT00000064705
lncRNA	AC099449:MSTRG.3498.109	bta-miR-4286_R+1	Dock9:ENSRNOT00000064705
lncRNA	AC099449:MSTRG.3498.12	bta-miR-4286_R+1	Dock9:ENSRNOT00000064705
lncRNA	AC099449:MSTRG.3498.125	bta-miR-4286_R+1	Dock9:ENSRNOT00000064705
lncRNA	AC099449:MSTRG.3498.27	bta-miR-4286_R+1	Dock9:ENSRNOT00000064705
lncRNA	AC099449:MSTRG.3498.52	bta-miR-4286_R+1	Dock9:ENSRNOT00000064705
lncRNA	AC099449:MSTRG.3498.63	bta-miR-4286_R+1	Dock9:ENSRNOT00000064705
lncRNA	AC099449:MSTRG.3498.65	bta-miR-4286_R+1	Dock9:ENSRNOT00000064705
lncRNA	AC099449:MSTRG.3498.66	bta-miR-4286_R+1	Dock9:ENSRNOT00000064705
lncRNA	AC099449:MSTRG.3498.67	bta-miR-4286_R+1	Dock9:ENSRNOT00000064705
lncRNA	AC099449:MSTRG.3498.71	bta-miR-4286_R+1	Dock9:ENSRNOT00000064705
lncRNA	AC099449:MSTRG.3498.74	bta-miR-4286_R+1	Dock9:ENSRNOT00000064705
lncRNA	AC099449:MSTRG.3498.92	bta-miR-4286_R+1	Dock9:ENSRNOT00000064705
lncRNA	Ahdc1:MSTRG.23055.1	bta-miR-4286_R+1	Dock9:ENSRNOT00000064705
lncRNA	Bend4:MSTRG.9559.3	bta-miR-4286_R+1	Dock9:ENSRNOT00000064705
lncRNA	Chtop:MSTRG.16142.1	bta-miR-4286_R+1	Dock9:ENSRNOT00000064705
lncRNA	Clint1:MSTRG.4783.3	bta-miR-4286_R+1	Dock9:ENSRNOT00000064705
lncRNA	Ebf1:MSTRG.4748.1	bta-miR-4286_R+1	Dock9:ENSRNOT00000064705
lncRNA	Ebf1:MSTRG.4748.3	bta-miR-4286_R+1	Dock9:ENSRNOT00000064705
lncRNA	Igf1r:MSTRG.2524.2	bta-miR-4286_R+1	Dock9:ENSRNOT00000064705
lncRNA	LOC100910854:ENSRNOT00000083218	bta-miR-4286_R+1	Dock9:ENSRNOT00000064705
lncRNA	LOC689840:MSTRG.26880.1	bta-miR-4286_R+1	Dock9:ENSRNOT00000064705
lncRNA	Mark2:MSTRG.3719.1	bta-miR-4286_R+1	Dock9:ENSRNOT00000064705
lncRNA	Nrp1:MSTRG.14677.2	bta-miR-4286_R+1	Dock9:ENSRNOT00000064705
lncRNA	Pip4p2:MSTRG.21869.3	bta-miR-4286_R+1	Dock9:ENSRNOT00000064705
lncRNA	Satb2:MSTRG.29208.2	bta-miR-4286_R+1	Dock9:ENSRNOT00000064705
lncRNA	Sdhc:MSTRG.8881.1	bta-miR-4286_R+1	Dock9:ENSRNOT00000064705
lncRNA	Zfhx3:MSTRG.14359.1	bta-miR-4286_R+1	Dock9:ENSRNOT00000064705
circRNA	ciRNA56	bta-miR-4286_R+1	Dock9:ENSRNOT00000064705
circRNA	circRNA1488	bta-miR-4286_R+1	Dock9:ENSRNOT00000064705
circRNA	circRNA1571	bta-miR-4286_R+1	Dock9:ENSRNOT00000064705
circRNA	circRNA1578	bta-miR-4286_R+1	Dock9:ENSRNOT00000064705
circRNA	circRNA4490	bta-miR-4286_R+1	Dock9:ENSRNOT00000064705
circRNA	circRNA4510	bta-miR-4286_R+1	Dock9:ENSRNOT00000064705
circRNA	circRNA4520	bta-miR-4286_R+1	Dock9:ENSRNOT00000064705
lncRNA	.:MSTRG.12659.1	bta-miR-4286_R+1	Fam20b:ENSRNOT00000006018
lncRNA	.:MSTRG.14147.1	bta-miR-4286_R+1	Fam20b:ENSRNOT00000006018
lncRNA	.:MSTRG.15267.1	bta-miR-4286_R+1	Fam20b:ENSRNOT00000006018
lncRNA	.:MSTRG.23375.1	bta-miR-4286_R+1	Fam20b:ENSRNOT00000006018
lncRNA	.:MSTRG.25540.1	bta-miR-4286_R+1	Fam20b:ENSRNOT00000006018
lncRNA	.:MSTRG.26886.1	bta-miR-4286_R+1	Fam20b:ENSRNOT00000006018
lncRNA	.:MSTRG.28897.2	bta-miR-4286_R+1	Fam20b:ENSRNOT00000006018
lncRNA	AABR07009428:MSTRG.15407.7	bta-miR-4286_R+1	Fam20b:ENSRNOT00000006018
lncRNA	AC099449:MSTRG.3498.102	bta-miR-4286_R+1	Fam20b:ENSRNOT00000006018
lncRNA	AC099449:MSTRG.3498.108	bta-miR-4286_R+1	Fam20b:ENSRNOT00000006018
lncRNA	AC099449:MSTRG.3498.109	bta-miR-4286_R+1	Fam20b:ENSRNOT00000006018
lncRNA	AC099449:MSTRG.3498.12	bta-miR-4286_R+1	Fam20b:ENSRNOT00000006018
lncRNA	AC099449:MSTRG.3498.125	bta-miR-4286_R+1	Fam20b:ENSRNOT00000006018
lncRNA	AC099449:MSTRG.3498.27	bta-miR-4286_R+1	Fam20b:ENSRNOT00000006018
lncRNA	AC099449:MSTRG.3498.52	bta-miR-4286_R+1	Fam20b:ENSRNOT00000006018
lncRNA	AC099449:MSTRG.3498.63	bta-miR-4286_R+1	Fam20b:ENSRNOT00000006018
lncRNA	AC099449:MSTRG.3498.65	bta-miR-4286_R+1	Fam20b:ENSRNOT00000006018
lncRNA	AC099449:MSTRG.3498.66	bta-miR-4286_R+1	Fam20b:ENSRNOT00000006018
lncRNA	AC099449:MSTRG.3498.67	bta-miR-4286_R+1	Fam20b:ENSRNOT00000006018
lncRNA	AC099449:MSTRG.3498.71	bta-miR-4286_R+1	Fam20b:ENSRNOT00000006018
lncRNA	AC099449:MSTRG.3498.74	bta-miR-4286_R+1	Fam20b:ENSRNOT00000006018
lncRNA	AC099449:MSTRG.3498.92	bta-miR-4286_R+1	Fam20b:ENSRNOT00000006018
lncRNA	Ahdc1:MSTRG.23055.1	bta-miR-4286_R+1	Fam20b:ENSRNOT00000006018
lncRNA	Bend4:MSTRG.9559.3	bta-miR-4286_R+1	Fam20b:ENSRNOT00000006018
lncRNA	Chtop:MSTRG.16142.1	bta-miR-4286_R+1	Fam20b:ENSRNOT00000006018
lncRNA	Clint1:MSTRG.4783.3	bta-miR-4286_R+1	Fam20b:ENSRNOT00000006018
lncRNA	Ebf1:MSTRG.4748.1	bta-miR-4286_R+1	Fam20b:ENSRNOT00000006018
lncRNA	Ebf1:MSTRG.4748.3	bta-miR-4286_R+1	Fam20b:ENSRNOT00000006018
lncRNA	Igf1r:MSTRG.2524.2	bta-miR-4286_R+1	Fam20b:ENSRNOT00000006018
lncRNA	LOC100910854:ENSRNOT00000083218	bta-miR-4286_R+1	Fam20b:ENSRNOT00000006018
lncRNA	LOC689840:MSTRG.26880.1	bta-miR-4286_R+1	Fam20b:ENSRNOT00000006018
lncRNA	Mark2:MSTRG.3719.1	bta-miR-4286_R+1	Fam20b:ENSRNOT00000006018
lncRNA	Nrp1:MSTRG.14677.2	bta-miR-4286_R+1	Fam20b:ENSRNOT00000006018
lncRNA	Pip4p2:MSTRG.21869.3	bta-miR-4286_R+1	Fam20b:ENSRNOT00000006018
lncRNA	Satb2:MSTRG.29208.2	bta-miR-4286_R+1	Fam20b:ENSRNOT00000006018
lncRNA	Sdhc:MSTRG.8881.1	bta-miR-4286_R+1	Fam20b:ENSRNOT00000006018
lncRNA	Zfhx3:MSTRG.14359.1	bta-miR-4286_R+1	Fam20b:ENSRNOT00000006018
circRNA	ciRNA56	bta-miR-4286_R+1	Fam20b:ENSRNOT00000006018
circRNA	circRNA1488	bta-miR-4286_R+1	Fam20b:ENSRNOT00000006018
circRNA	circRNA1571	bta-miR-4286_R+1	Fam20b:ENSRNOT00000006018
circRNA	circRNA1578	bta-miR-4286_R+1	Fam20b:ENSRNOT00000006018
circRNA	circRNA4490	bta-miR-4286_R+1	Fam20b:ENSRNOT00000006018
circRNA	circRNA4510	bta-miR-4286_R+1	Fam20b:ENSRNOT00000006018
circRNA	circRNA4520	bta-miR-4286_R+1	Fam20b:ENSRNOT00000006018
lncRNA	.:MSTRG.12659.1	bta-miR-4286_R+1	Fbxl3:ENSRNOT00000089876
lncRNA	.:MSTRG.14147.1	bta-miR-4286_R+1	Fbxl3:ENSRNOT00000089876
lncRNA	.:MSTRG.15267.1	bta-miR-4286_R+1	Fbxl3:ENSRNOT00000089876
lncRNA	.:MSTRG.23375.1	bta-miR-4286_R+1	Fbxl3:ENSRNOT00000089876
lncRNA	.:MSTRG.25540.1	bta-miR-4286_R+1	Fbxl3:ENSRNOT00000089876
lncRNA	.:MSTRG.26886.1	bta-miR-4286_R+1	Fbxl3:ENSRNOT00000089876
lncRNA	.:MSTRG.28897.2	bta-miR-4286_R+1	Fbxl3:ENSRNOT00000089876
lncRNA	AABR07009428:MSTRG.15407.7	bta-miR-4286_R+1	Fbxl3:ENSRNOT00000089876
lncRNA	AC099449:MSTRG.3498.102	bta-miR-4286_R+1	Fbxl3:ENSRNOT00000089876
lncRNA	AC099449:MSTRG.3498.108	bta-miR-4286_R+1	Fbxl3:ENSRNOT00000089876
lncRNA	AC099449:MSTRG.3498.109	bta-miR-4286_R+1	Fbxl3:ENSRNOT00000089876
lncRNA	AC099449:MSTRG.3498.12	bta-miR-4286_R+1	Fbxl3:ENSRNOT00000089876
lncRNA	AC099449:MSTRG.3498.125	bta-miR-4286_R+1	Fbxl3:ENSRNOT00000089876
lncRNA	AC099449:MSTRG.3498.27	bta-miR-4286_R+1	Fbxl3:ENSRNOT00000089876
lncRNA	AC099449:MSTRG.3498.52	bta-miR-4286_R+1	Fbxl3:ENSRNOT00000089876
lncRNA	AC099449:MSTRG.3498.63	bta-miR-4286_R+1	Fbxl3:ENSRNOT00000089876
lncRNA	AC099449:MSTRG.3498.65	bta-miR-4286_R+1	Fbxl3:ENSRNOT00000089876
lncRNA	AC099449:MSTRG.3498.66	bta-miR-4286_R+1	Fbxl3:ENSRNOT00000089876
lncRNA	AC099449:MSTRG.3498.67	bta-miR-4286_R+1	Fbxl3:ENSRNOT00000089876
lncRNA	AC099449:MSTRG.3498.71	bta-miR-4286_R+1	Fbxl3:ENSRNOT00000089876
lncRNA	AC099449:MSTRG.3498.74	bta-miR-4286_R+1	Fbxl3:ENSRNOT00000089876
lncRNA	AC099449:MSTRG.3498.92	bta-miR-4286_R+1	Fbxl3:ENSRNOT00000089876
lncRNA	Ahdc1:MSTRG.23055.1	bta-miR-4286_R+1	Fbxl3:ENSRNOT00000089876
lncRNA	Bend4:MSTRG.9559.3	bta-miR-4286_R+1	Fbxl3:ENSRNOT00000089876
lncRNA	Chtop:MSTRG.16142.1	bta-miR-4286_R+1	Fbxl3:ENSRNOT00000089876
lncRNA	Clint1:MSTRG.4783.3	bta-miR-4286_R+1	Fbxl3:ENSRNOT00000089876
lncRNA	Ebf1:MSTRG.4748.1	bta-miR-4286_R+1	Fbxl3:ENSRNOT00000089876
lncRNA	Ebf1:MSTRG.4748.3	bta-miR-4286_R+1	Fbxl3:ENSRNOT00000089876
lncRNA	Igf1r:MSTRG.2524.2	bta-miR-4286_R+1	Fbxl3:ENSRNOT00000089876
lncRNA	LOC100910854:ENSRNOT00000083218	bta-miR-4286_R+1	Fbxl3:ENSRNOT00000089876
lncRNA	LOC689840:MSTRG.26880.1	bta-miR-4286_R+1	Fbxl3:ENSRNOT00000089876
lncRNA	Mark2:MSTRG.3719.1	bta-miR-4286_R+1	Fbxl3:ENSRNOT00000089876
lncRNA	Nrp1:MSTRG.14677.2	bta-miR-4286_R+1	Fbxl3:ENSRNOT00000089876
lncRNA	Pip4p2:MSTRG.21869.3	bta-miR-4286_R+1	Fbxl3:ENSRNOT00000089876
lncRNA	Satb2:MSTRG.29208.2	bta-miR-4286_R+1	Fbxl3:ENSRNOT00000089876
lncRNA	Sdhc:MSTRG.8881.1	bta-miR-4286_R+1	Fbxl3:ENSRNOT00000089876
lncRNA	Zfhx3:MSTRG.14359.1	bta-miR-4286_R+1	Fbxl3:ENSRNOT00000089876
circRNA	ciRNA56	bta-miR-4286_R+1	Fbxl3:ENSRNOT00000089876
circRNA	circRNA1488	bta-miR-4286_R+1	Fbxl3:ENSRNOT00000089876
circRNA	circRNA1571	bta-miR-4286_R+1	Fbxl3:ENSRNOT00000089876
circRNA	circRNA1578	bta-miR-4286_R+1	Fbxl3:ENSRNOT00000089876
circRNA	circRNA4490	bta-miR-4286_R+1	Fbxl3:ENSRNOT00000089876
circRNA	circRNA4510	bta-miR-4286_R+1	Fbxl3:ENSRNOT00000089876
circRNA	circRNA4520	bta-miR-4286_R+1	Fbxl3:ENSRNOT00000089876
lncRNA	.:MSTRG.12659.1	bta-miR-4286_R+1	Grsf1:ENSRNOT00000086571
lncRNA	.:MSTRG.14147.1	bta-miR-4286_R+1	Grsf1:ENSRNOT00000086571
lncRNA	.:MSTRG.15267.1	bta-miR-4286_R+1	Grsf1:ENSRNOT00000086571
lncRNA	.:MSTRG.23375.1	bta-miR-4286_R+1	Grsf1:ENSRNOT00000086571
lncRNA	.:MSTRG.25540.1	bta-miR-4286_R+1	Grsf1:ENSRNOT00000086571
lncRNA	.:MSTRG.26886.1	bta-miR-4286_R+1	Grsf1:ENSRNOT00000086571
lncRNA	.:MSTRG.28897.2	bta-miR-4286_R+1	Grsf1:ENSRNOT00000086571
lncRNA	AABR07009428:MSTRG.15407.7	bta-miR-4286_R+1	Grsf1:ENSRNOT00000086571
lncRNA	AC099449:MSTRG.3498.102	bta-miR-4286_R+1	Grsf1:ENSRNOT00000086571
lncRNA	AC099449:MSTRG.3498.108	bta-miR-4286_R+1	Grsf1:ENSRNOT00000086571
lncRNA	AC099449:MSTRG.3498.109	bta-miR-4286_R+1	Grsf1:ENSRNOT00000086571
lncRNA	AC099449:MSTRG.3498.12	bta-miR-4286_R+1	Grsf1:ENSRNOT00000086571
lncRNA	AC099449:MSTRG.3498.125	bta-miR-4286_R+1	Grsf1:ENSRNOT00000086571
lncRNA	AC099449:MSTRG.3498.27	bta-miR-4286_R+1	Grsf1:ENSRNOT00000086571
lncRNA	AC099449:MSTRG.3498.52	bta-miR-4286_R+1	Grsf1:ENSRNOT00000086571
lncRNA	AC099449:MSTRG.3498.63	bta-miR-4286_R+1	Grsf1:ENSRNOT00000086571
lncRNA	AC099449:MSTRG.3498.65	bta-miR-4286_R+1	Grsf1:ENSRNOT00000086571
lncRNA	AC099449:MSTRG.3498.66	bta-miR-4286_R+1	Grsf1:ENSRNOT00000086571
lncRNA	AC099449:MSTRG.3498.67	bta-miR-4286_R+1	Grsf1:ENSRNOT00000086571
lncRNA	AC099449:MSTRG.3498.71	bta-miR-4286_R+1	Grsf1:ENSRNOT00000086571
lncRNA	AC099449:MSTRG.3498.74	bta-miR-4286_R+1	Grsf1:ENSRNOT00000086571
lncRNA	AC099449:MSTRG.3498.92	bta-miR-4286_R+1	Grsf1:ENSRNOT00000086571
lncRNA	Ahdc1:MSTRG.23055.1	bta-miR-4286_R+1	Grsf1:ENSRNOT00000086571
lncRNA	Bend4:MSTRG.9559.3	bta-miR-4286_R+1	Grsf1:ENSRNOT00000086571
lncRNA	Chtop:MSTRG.16142.1	bta-miR-4286_R+1	Grsf1:ENSRNOT00000086571
lncRNA	Clint1:MSTRG.4783.3	bta-miR-4286_R+1	Grsf1:ENSRNOT00000086571
lncRNA	Ebf1:MSTRG.4748.1	bta-miR-4286_R+1	Grsf1:ENSRNOT00000086571
lncRNA	Ebf1:MSTRG.4748.3	bta-miR-4286_R+1	Grsf1:ENSRNOT00000086571
lncRNA	Igf1r:MSTRG.2524.2	bta-miR-4286_R+1	Grsf1:ENSRNOT00000086571
lncRNA	LOC100910854:ENSRNOT00000083218	bta-miR-4286_R+1	Grsf1:ENSRNOT00000086571
lncRNA	LOC689840:MSTRG.26880.1	bta-miR-4286_R+1	Grsf1:ENSRNOT00000086571
lncRNA	Mark2:MSTRG.3719.1	bta-miR-4286_R+1	Grsf1:ENSRNOT00000086571
lncRNA	Nrp1:MSTRG.14677.2	bta-miR-4286_R+1	Grsf1:ENSRNOT00000086571
lncRNA	Pip4p2:MSTRG.21869.3	bta-miR-4286_R+1	Grsf1:ENSRNOT00000086571
lncRNA	Satb2:MSTRG.29208.2	bta-miR-4286_R+1	Grsf1:ENSRNOT00000086571
lncRNA	Sdhc:MSTRG.8881.1	bta-miR-4286_R+1	Grsf1:ENSRNOT00000086571
lncRNA	Zfhx3:MSTRG.14359.1	bta-miR-4286_R+1	Grsf1:ENSRNOT00000086571
circRNA	ciRNA56	bta-miR-4286_R+1	Grsf1:ENSRNOT00000086571
circRNA	circRNA1488	bta-miR-4286_R+1	Grsf1:ENSRNOT00000086571
circRNA	circRNA1571	bta-miR-4286_R+1	Grsf1:ENSRNOT00000086571
circRNA	circRNA1578	bta-miR-4286_R+1	Grsf1:ENSRNOT00000086571
circRNA	circRNA4490	bta-miR-4286_R+1	Grsf1:ENSRNOT00000086571
circRNA	circRNA4510	bta-miR-4286_R+1	Grsf1:ENSRNOT00000086571
circRNA	circRNA4520	bta-miR-4286_R+1	Grsf1:ENSRNOT00000086571
lncRNA	.:MSTRG.12659.1	bta-miR-4286_R+1	Ilf3:ENSRNOT00000079230
lncRNA	.:MSTRG.14147.1	bta-miR-4286_R+1	Ilf3:ENSRNOT00000079230
lncRNA	.:MSTRG.15267.1	bta-miR-4286_R+1	Ilf3:ENSRNOT00000079230
lncRNA	.:MSTRG.23375.1	bta-miR-4286_R+1	Ilf3:ENSRNOT00000079230
lncRNA	.:MSTRG.25540.1	bta-miR-4286_R+1	Ilf3:ENSRNOT00000079230
lncRNA	.:MSTRG.26886.1	bta-miR-4286_R+1	Ilf3:ENSRNOT00000079230
lncRNA	.:MSTRG.28897.2	bta-miR-4286_R+1	Ilf3:ENSRNOT00000079230
lncRNA	AABR07009428:MSTRG.15407.7	bta-miR-4286_R+1	Ilf3:ENSRNOT00000079230
lncRNA	AC099449:MSTRG.3498.102	bta-miR-4286_R+1	Ilf3:ENSRNOT00000079230
lncRNA	AC099449:MSTRG.3498.108	bta-miR-4286_R+1	Ilf3:ENSRNOT00000079230
lncRNA	AC099449:MSTRG.3498.109	bta-miR-4286_R+1	Ilf3:ENSRNOT00000079230
lncRNA	AC099449:MSTRG.3498.12	bta-miR-4286_R+1	Ilf3:ENSRNOT00000079230
lncRNA	AC099449:MSTRG.3498.125	bta-miR-4286_R+1	Ilf3:ENSRNOT00000079230
lncRNA	AC099449:MSTRG.3498.27	bta-miR-4286_R+1	Ilf3:ENSRNOT00000079230
lncRNA	AC099449:MSTRG.3498.52	bta-miR-4286_R+1	Ilf3:ENSRNOT00000079230
lncRNA	AC099449:MSTRG.3498.63	bta-miR-4286_R+1	Ilf3:ENSRNOT00000079230
lncRNA	AC099449:MSTRG.3498.65	bta-miR-4286_R+1	Ilf3:ENSRNOT00000079230
lncRNA	AC099449:MSTRG.3498.66	bta-miR-4286_R+1	Ilf3:ENSRNOT00000079230
lncRNA	AC099449:MSTRG.3498.67	bta-miR-4286_R+1	Ilf3:ENSRNOT00000079230
lncRNA	AC099449:MSTRG.3498.71	bta-miR-4286_R+1	Ilf3:ENSRNOT00000079230
lncRNA	AC099449:MSTRG.3498.74	bta-miR-4286_R+1	Ilf3:ENSRNOT00000079230
lncRNA	AC099449:MSTRG.3498.92	bta-miR-4286_R+1	Ilf3:ENSRNOT00000079230
lncRNA	Ahdc1:MSTRG.23055.1	bta-miR-4286_R+1	Ilf3:ENSRNOT00000079230
lncRNA	Bend4:MSTRG.9559.3	bta-miR-4286_R+1	Ilf3:ENSRNOT00000079230
lncRNA	Chtop:MSTRG.16142.1	bta-miR-4286_R+1	Ilf3:ENSRNOT00000079230
lncRNA	Clint1:MSTRG.4783.3	bta-miR-4286_R+1	Ilf3:ENSRNOT00000079230
lncRNA	Ebf1:MSTRG.4748.1	bta-miR-4286_R+1	Ilf3:ENSRNOT00000079230
lncRNA	Ebf1:MSTRG.4748.3	bta-miR-4286_R+1	Ilf3:ENSRNOT00000079230
lncRNA	Igf1r:MSTRG.2524.2	bta-miR-4286_R+1	Ilf3:ENSRNOT00000079230
lncRNA	LOC100910854:ENSRNOT00000083218	bta-miR-4286_R+1	Ilf3:ENSRNOT00000079230
lncRNA	LOC689840:MSTRG.26880.1	bta-miR-4286_R+1	Ilf3:ENSRNOT00000079230
lncRNA	Mark2:MSTRG.3719.1	bta-miR-4286_R+1	Ilf3:ENSRNOT00000079230
lncRNA	Nrp1:MSTRG.14677.2	bta-miR-4286_R+1	Ilf3:ENSRNOT00000079230
lncRNA	Pip4p2:MSTRG.21869.3	bta-miR-4286_R+1	Ilf3:ENSRNOT00000079230
lncRNA	Satb2:MSTRG.29208.2	bta-miR-4286_R+1	Ilf3:ENSRNOT00000079230
lncRNA	Sdhc:MSTRG.8881.1	bta-miR-4286_R+1	Ilf3:ENSRNOT00000079230
lncRNA	Zfhx3:MSTRG.14359.1	bta-miR-4286_R+1	Ilf3:ENSRNOT00000079230
circRNA	ciRNA56	bta-miR-4286_R+1	Ilf3:ENSRNOT00000079230
circRNA	circRNA1488	bta-miR-4286_R+1	Ilf3:ENSRNOT00000079230
circRNA	circRNA1571	bta-miR-4286_R+1	Ilf3:ENSRNOT00000079230
circRNA	circRNA1578	bta-miR-4286_R+1	Ilf3:ENSRNOT00000079230
circRNA	circRNA4490	bta-miR-4286_R+1	Ilf3:ENSRNOT00000079230
circRNA	circRNA4510	bta-miR-4286_R+1	Ilf3:ENSRNOT00000079230
circRNA	circRNA4520	bta-miR-4286_R+1	Ilf3:ENSRNOT00000079230
lncRNA	.:MSTRG.12659.1	bta-miR-4286_R+1	Map2:ENSRNOT00000092445
lncRNA	.:MSTRG.14147.1	bta-miR-4286_R+1	Map2:ENSRNOT00000092445
lncRNA	.:MSTRG.15267.1	bta-miR-4286_R+1	Map2:ENSRNOT00000092445
lncRNA	.:MSTRG.23375.1	bta-miR-4286_R+1	Map2:ENSRNOT00000092445
lncRNA	.:MSTRG.25540.1	bta-miR-4286_R+1	Map2:ENSRNOT00000092445
lncRNA	.:MSTRG.26886.1	bta-miR-4286_R+1	Map2:ENSRNOT00000092445
lncRNA	.:MSTRG.28897.2	bta-miR-4286_R+1	Map2:ENSRNOT00000092445
lncRNA	AABR07009428:MSTRG.15407.7	bta-miR-4286_R+1	Map2:ENSRNOT00000092445
lncRNA	AC099449:MSTRG.3498.102	bta-miR-4286_R+1	Map2:ENSRNOT00000092445
lncRNA	AC099449:MSTRG.3498.108	bta-miR-4286_R+1	Map2:ENSRNOT00000092445
lncRNA	AC099449:MSTRG.3498.109	bta-miR-4286_R+1	Map2:ENSRNOT00000092445
lncRNA	AC099449:MSTRG.3498.12	bta-miR-4286_R+1	Map2:ENSRNOT00000092445
lncRNA	AC099449:MSTRG.3498.125	bta-miR-4286_R+1	Map2:ENSRNOT00000092445
lncRNA	AC099449:MSTRG.3498.27	bta-miR-4286_R+1	Map2:ENSRNOT00000092445
lncRNA	AC099449:MSTRG.3498.52	bta-miR-4286_R+1	Map2:ENSRNOT00000092445
lncRNA	AC099449:MSTRG.3498.63	bta-miR-4286_R+1	Map2:ENSRNOT00000092445
lncRNA	AC099449:MSTRG.3498.65	bta-miR-4286_R+1	Map2:ENSRNOT00000092445
lncRNA	AC099449:MSTRG.3498.66	bta-miR-4286_R+1	Map2:ENSRNOT00000092445
lncRNA	AC099449:MSTRG.3498.67	bta-miR-4286_R+1	Map2:ENSRNOT00000092445
lncRNA	AC099449:MSTRG.3498.71	bta-miR-4286_R+1	Map2:ENSRNOT00000092445
lncRNA	AC099449:MSTRG.3498.74	bta-miR-4286_R+1	Map2:ENSRNOT00000092445
lncRNA	AC099449:MSTRG.3498.92	bta-miR-4286_R+1	Map2:ENSRNOT00000092445
lncRNA	Ahdc1:MSTRG.23055.1	bta-miR-4286_R+1	Map2:ENSRNOT00000092445
lncRNA	Bend4:MSTRG.9559.3	bta-miR-4286_R+1	Map2:ENSRNOT00000092445
lncRNA	Chtop:MSTRG.16142.1	bta-miR-4286_R+1	Map2:ENSRNOT00000092445
lncRNA	Clint1:MSTRG.4783.3	bta-miR-4286_R+1	Map2:ENSRNOT00000092445
lncRNA	Ebf1:MSTRG.4748.1	bta-miR-4286_R+1	Map2:ENSRNOT00000092445
lncRNA	Ebf1:MSTRG.4748.3	bta-miR-4286_R+1	Map2:ENSRNOT00000092445
lncRNA	Igf1r:MSTRG.2524.2	bta-miR-4286_R+1	Map2:ENSRNOT00000092445
lncRNA	LOC100910854:ENSRNOT00000083218	bta-miR-4286_R+1	Map2:ENSRNOT00000092445
lncRNA	LOC689840:MSTRG.26880.1	bta-miR-4286_R+1	Map2:ENSRNOT00000092445
lncRNA	Mark2:MSTRG.3719.1	bta-miR-4286_R+1	Map2:ENSRNOT00000092445
lncRNA	Nrp1:MSTRG.14677.2	bta-miR-4286_R+1	Map2:ENSRNOT00000092445
lncRNA	Pip4p2:MSTRG.21869.3	bta-miR-4286_R+1	Map2:ENSRNOT00000092445
lncRNA	Satb2:MSTRG.29208.2	bta-miR-4286_R+1	Map2:ENSRNOT00000092445
lncRNA	Sdhc:MSTRG.8881.1	bta-miR-4286_R+1	Map2:ENSRNOT00000092445
lncRNA	Zfhx3:MSTRG.14359.1	bta-miR-4286_R+1	Map2:ENSRNOT00000092445
circRNA	ciRNA56	bta-miR-4286_R+1	Map2:ENSRNOT00000092445
circRNA	circRNA1488	bta-miR-4286_R+1	Map2:ENSRNOT00000092445
circRNA	circRNA1571	bta-miR-4286_R+1	Map2:ENSRNOT00000092445
circRNA	circRNA1578	bta-miR-4286_R+1	Map2:ENSRNOT00000092445
circRNA	circRNA4490	bta-miR-4286_R+1	Map2:ENSRNOT00000092445
circRNA	circRNA4510	bta-miR-4286_R+1	Map2:ENSRNOT00000092445
circRNA	circRNA4520	bta-miR-4286_R+1	Map2:ENSRNOT00000092445
lncRNA	.:MSTRG.12659.1	bta-miR-4286_R+1	Nedd4:ENSRNOT00000088391
lncRNA	.:MSTRG.14147.1	bta-miR-4286_R+1	Nedd4:ENSRNOT00000088391
lncRNA	.:MSTRG.15267.1	bta-miR-4286_R+1	Nedd4:ENSRNOT00000088391
lncRNA	.:MSTRG.23375.1	bta-miR-4286_R+1	Nedd4:ENSRNOT00000088391
lncRNA	.:MSTRG.25540.1	bta-miR-4286_R+1	Nedd4:ENSRNOT00000088391
lncRNA	.:MSTRG.26886.1	bta-miR-4286_R+1	Nedd4:ENSRNOT00000088391
lncRNA	.:MSTRG.28897.2	bta-miR-4286_R+1	Nedd4:ENSRNOT00000088391
lncRNA	AABR07009428:MSTRG.15407.7	bta-miR-4286_R+1	Nedd4:ENSRNOT00000088391
lncRNA	AC099449:MSTRG.3498.102	bta-miR-4286_R+1	Nedd4:ENSRNOT00000088391
lncRNA	AC099449:MSTRG.3498.108	bta-miR-4286_R+1	Nedd4:ENSRNOT00000088391
lncRNA	AC099449:MSTRG.3498.109	bta-miR-4286_R+1	Nedd4:ENSRNOT00000088391
lncRNA	AC099449:MSTRG.3498.12	bta-miR-4286_R+1	Nedd4:ENSRNOT00000088391
lncRNA	AC099449:MSTRG.3498.125	bta-miR-4286_R+1	Nedd4:ENSRNOT00000088391
lncRNA	AC099449:MSTRG.3498.27	bta-miR-4286_R+1	Nedd4:ENSRNOT00000088391
lncRNA	AC099449:MSTRG.3498.52	bta-miR-4286_R+1	Nedd4:ENSRNOT00000088391
lncRNA	AC099449:MSTRG.3498.63	bta-miR-4286_R+1	Nedd4:ENSRNOT00000088391
lncRNA	AC099449:MSTRG.3498.65	bta-miR-4286_R+1	Nedd4:ENSRNOT00000088391
lncRNA	AC099449:MSTRG.3498.66	bta-miR-4286_R+1	Nedd4:ENSRNOT00000088391
lncRNA	AC099449:MSTRG.3498.67	bta-miR-4286_R+1	Nedd4:ENSRNOT00000088391
lncRNA	AC099449:MSTRG.3498.71	bta-miR-4286_R+1	Nedd4:ENSRNOT00000088391
lncRNA	AC099449:MSTRG.3498.74	bta-miR-4286_R+1	Nedd4:ENSRNOT00000088391
lncRNA	AC099449:MSTRG.3498.92	bta-miR-4286_R+1	Nedd4:ENSRNOT00000088391
lncRNA	Ahdc1:MSTRG.23055.1	bta-miR-4286_R+1	Nedd4:ENSRNOT00000088391
lncRNA	Bend4:MSTRG.9559.3	bta-miR-4286_R+1	Nedd4:ENSRNOT00000088391
lncRNA	Chtop:MSTRG.16142.1	bta-miR-4286_R+1	Nedd4:ENSRNOT00000088391
lncRNA	Clint1:MSTRG.4783.3	bta-miR-4286_R+1	Nedd4:ENSRNOT00000088391
lncRNA	Ebf1:MSTRG.4748.1	bta-miR-4286_R+1	Nedd4:ENSRNOT00000088391
lncRNA	Ebf1:MSTRG.4748.3	bta-miR-4286_R+1	Nedd4:ENSRNOT00000088391
lncRNA	Igf1r:MSTRG.2524.2	bta-miR-4286_R+1	Nedd4:ENSRNOT00000088391
lncRNA	LOC100910854:ENSRNOT00000083218	bta-miR-4286_R+1	Nedd4:ENSRNOT00000088391
lncRNA	LOC689840:MSTRG.26880.1	bta-miR-4286_R+1	Nedd4:ENSRNOT00000088391
lncRNA	Mark2:MSTRG.3719.1	bta-miR-4286_R+1	Nedd4:ENSRNOT00000088391
lncRNA	Nrp1:MSTRG.14677.2	bta-miR-4286_R+1	Nedd4:ENSRNOT00000088391
lncRNA	Pip4p2:MSTRG.21869.3	bta-miR-4286_R+1	Nedd4:ENSRNOT00000088391
lncRNA	Satb2:MSTRG.29208.2	bta-miR-4286_R+1	Nedd4:ENSRNOT00000088391
lncRNA	Sdhc:MSTRG.8881.1	bta-miR-4286_R+1	Nedd4:ENSRNOT00000088391
lncRNA	Zfhx3:MSTRG.14359.1	bta-miR-4286_R+1	Nedd4:ENSRNOT00000088391
circRNA	ciRNA56	bta-miR-4286_R+1	Nedd4:ENSRNOT00000088391
circRNA	circRNA1488	bta-miR-4286_R+1	Nedd4:ENSRNOT00000088391
circRNA	circRNA1571	bta-miR-4286_R+1	Nedd4:ENSRNOT00000088391
circRNA	circRNA1578	bta-miR-4286_R+1	Nedd4:ENSRNOT00000088391
circRNA	circRNA4490	bta-miR-4286_R+1	Nedd4:ENSRNOT00000088391
circRNA	circRNA4510	bta-miR-4286_R+1	Nedd4:ENSRNOT00000088391
circRNA	circRNA4520	bta-miR-4286_R+1	Nedd4:ENSRNOT00000088391
lncRNA	.:MSTRG.12659.1	bta-miR-4286_R+1	Pea15:ENSRNOT00000070812
lncRNA	.:MSTRG.14147.1	bta-miR-4286_R+1	Pea15:ENSRNOT00000070812
lncRNA	.:MSTRG.15267.1	bta-miR-4286_R+1	Pea15:ENSRNOT00000070812
lncRNA	.:MSTRG.23375.1	bta-miR-4286_R+1	Pea15:ENSRNOT00000070812
lncRNA	.:MSTRG.25540.1	bta-miR-4286_R+1	Pea15:ENSRNOT00000070812
lncRNA	.:MSTRG.26886.1	bta-miR-4286_R+1	Pea15:ENSRNOT00000070812
lncRNA	.:MSTRG.28897.2	bta-miR-4286_R+1	Pea15:ENSRNOT00000070812
lncRNA	AABR07009428:MSTRG.15407.7	bta-miR-4286_R+1	Pea15:ENSRNOT00000070812
lncRNA	AC099449:MSTRG.3498.102	bta-miR-4286_R+1	Pea15:ENSRNOT00000070812
lncRNA	AC099449:MSTRG.3498.108	bta-miR-4286_R+1	Pea15:ENSRNOT00000070812
lncRNA	AC099449:MSTRG.3498.109	bta-miR-4286_R+1	Pea15:ENSRNOT00000070812
lncRNA	AC099449:MSTRG.3498.12	bta-miR-4286_R+1	Pea15:ENSRNOT00000070812
lncRNA	AC099449:MSTRG.3498.125	bta-miR-4286_R+1	Pea15:ENSRNOT00000070812
lncRNA	AC099449:MSTRG.3498.27	bta-miR-4286_R+1	Pea15:ENSRNOT00000070812
lncRNA	AC099449:MSTRG.3498.52	bta-miR-4286_R+1	Pea15:ENSRNOT00000070812
lncRNA	AC099449:MSTRG.3498.63	bta-miR-4286_R+1	Pea15:ENSRNOT00000070812
lncRNA	AC099449:MSTRG.3498.65	bta-miR-4286_R+1	Pea15:ENSRNOT00000070812
lncRNA	AC099449:MSTRG.3498.66	bta-miR-4286_R+1	Pea15:ENSRNOT00000070812
lncRNA	AC099449:MSTRG.3498.67	bta-miR-4286_R+1	Pea15:ENSRNOT00000070812
lncRNA	AC099449:MSTRG.3498.71	bta-miR-4286_R+1	Pea15:ENSRNOT00000070812
lncRNA	AC099449:MSTRG.3498.74	bta-miR-4286_R+1	Pea15:ENSRNOT00000070812
lncRNA	AC099449:MSTRG.3498.92	bta-miR-4286_R+1	Pea15:ENSRNOT00000070812
lncRNA	Ahdc1:MSTRG.23055.1	bta-miR-4286_R+1	Pea15:ENSRNOT00000070812
lncRNA	Bend4:MSTRG.9559.3	bta-miR-4286_R+1	Pea15:ENSRNOT00000070812
lncRNA	Chtop:MSTRG.16142.1	bta-miR-4286_R+1	Pea15:ENSRNOT00000070812
lncRNA	Clint1:MSTRG.4783.3	bta-miR-4286_R+1	Pea15:ENSRNOT00000070812
lncRNA	Ebf1:MSTRG.4748.1	bta-miR-4286_R+1	Pea15:ENSRNOT00000070812
lncRNA	Ebf1:MSTRG.4748.3	bta-miR-4286_R+1	Pea15:ENSRNOT00000070812
lncRNA	Igf1r:MSTRG.2524.2	bta-miR-4286_R+1	Pea15:ENSRNOT00000070812
lncRNA	LOC100910854:ENSRNOT00000083218	bta-miR-4286_R+1	Pea15:ENSRNOT00000070812
lncRNA	LOC689840:MSTRG.26880.1	bta-miR-4286_R+1	Pea15:ENSRNOT00000070812
lncRNA	Mark2:MSTRG.3719.1	bta-miR-4286_R+1	Pea15:ENSRNOT00000070812
lncRNA	Nrp1:MSTRG.14677.2	bta-miR-4286_R+1	Pea15:ENSRNOT00000070812
lncRNA	Pip4p2:MSTRG.21869.3	bta-miR-4286_R+1	Pea15:ENSRNOT00000070812
lncRNA	Satb2:MSTRG.29208.2	bta-miR-4286_R+1	Pea15:ENSRNOT00000070812
lncRNA	Sdhc:MSTRG.8881.1	bta-miR-4286_R+1	Pea15:ENSRNOT00000070812
lncRNA	Zfhx3:MSTRG.14359.1	bta-miR-4286_R+1	Pea15:ENSRNOT00000070812
circRNA	ciRNA56	bta-miR-4286_R+1	Pea15:ENSRNOT00000070812
circRNA	circRNA1488	bta-miR-4286_R+1	Pea15:ENSRNOT00000070812
circRNA	circRNA1571	bta-miR-4286_R+1	Pea15:ENSRNOT00000070812
circRNA	circRNA1578	bta-miR-4286_R+1	Pea15:ENSRNOT00000070812
circRNA	circRNA4490	bta-miR-4286_R+1	Pea15:ENSRNOT00000070812
circRNA	circRNA4510	bta-miR-4286_R+1	Pea15:ENSRNOT00000070812
circRNA	circRNA4520	bta-miR-4286_R+1	Pea15:ENSRNOT00000070812
lncRNA	.:MSTRG.12659.1	bta-miR-4286_R+1	Pi16:ENSRNOT00000000632
lncRNA	.:MSTRG.14147.1	bta-miR-4286_R+1	Pi16:ENSRNOT00000000632
lncRNA	.:MSTRG.15267.1	bta-miR-4286_R+1	Pi16:ENSRNOT00000000632
lncRNA	.:MSTRG.23375.1	bta-miR-4286_R+1	Pi16:ENSRNOT00000000632
lncRNA	.:MSTRG.25540.1	bta-miR-4286_R+1	Pi16:ENSRNOT00000000632
lncRNA	.:MSTRG.26886.1	bta-miR-4286_R+1	Pi16:ENSRNOT00000000632
lncRNA	.:MSTRG.28897.2	bta-miR-4286_R+1	Pi16:ENSRNOT00000000632
lncRNA	AABR07009428:MSTRG.15407.7	bta-miR-4286_R+1	Pi16:ENSRNOT00000000632
lncRNA	AC099449:MSTRG.3498.102	bta-miR-4286_R+1	Pi16:ENSRNOT00000000632
lncRNA	AC099449:MSTRG.3498.108	bta-miR-4286_R+1	Pi16:ENSRNOT00000000632
lncRNA	AC099449:MSTRG.3498.109	bta-miR-4286_R+1	Pi16:ENSRNOT00000000632
lncRNA	AC099449:MSTRG.3498.12	bta-miR-4286_R+1	Pi16:ENSRNOT00000000632
lncRNA	AC099449:MSTRG.3498.125	bta-miR-4286_R+1	Pi16:ENSRNOT00000000632
lncRNA	AC099449:MSTRG.3498.27	bta-miR-4286_R+1	Pi16:ENSRNOT00000000632
lncRNA	AC099449:MSTRG.3498.52	bta-miR-4286_R+1	Pi16:ENSRNOT00000000632
lncRNA	AC099449:MSTRG.3498.63	bta-miR-4286_R+1	Pi16:ENSRNOT00000000632
lncRNA	AC099449:MSTRG.3498.65	bta-miR-4286_R+1	Pi16:ENSRNOT00000000632
lncRNA	AC099449:MSTRG.3498.66	bta-miR-4286_R+1	Pi16:ENSRNOT00000000632
lncRNA	AC099449:MSTRG.3498.67	bta-miR-4286_R+1	Pi16:ENSRNOT00000000632
lncRNA	AC099449:MSTRG.3498.71	bta-miR-4286_R+1	Pi16:ENSRNOT00000000632
lncRNA	AC099449:MSTRG.3498.74	bta-miR-4286_R+1	Pi16:ENSRNOT00000000632
lncRNA	AC099449:MSTRG.3498.92	bta-miR-4286_R+1	Pi16:ENSRNOT00000000632
lncRNA	Ahdc1:MSTRG.23055.1	bta-miR-4286_R+1	Pi16:ENSRNOT00000000632
lncRNA	Bend4:MSTRG.9559.3	bta-miR-4286_R+1	Pi16:ENSRNOT00000000632
lncRNA	Chtop:MSTRG.16142.1	bta-miR-4286_R+1	Pi16:ENSRNOT00000000632
lncRNA	Clint1:MSTRG.4783.3	bta-miR-4286_R+1	Pi16:ENSRNOT00000000632
lncRNA	Ebf1:MSTRG.4748.1	bta-miR-4286_R+1	Pi16:ENSRNOT00000000632
lncRNA	Ebf1:MSTRG.4748.3	bta-miR-4286_R+1	Pi16:ENSRNOT00000000632
lncRNA	Igf1r:MSTRG.2524.2	bta-miR-4286_R+1	Pi16:ENSRNOT00000000632
lncRNA	LOC100910854:ENSRNOT00000083218	bta-miR-4286_R+1	Pi16:ENSRNOT00000000632
lncRNA	LOC689840:MSTRG.26880.1	bta-miR-4286_R+1	Pi16:ENSRNOT00000000632
lncRNA	Mark2:MSTRG.3719.1	bta-miR-4286_R+1	Pi16:ENSRNOT00000000632
lncRNA	Nrp1:MSTRG.14677.2	bta-miR-4286_R+1	Pi16:ENSRNOT00000000632
lncRNA	Pip4p2:MSTRG.21869.3	bta-miR-4286_R+1	Pi16:ENSRNOT00000000632
lncRNA	Satb2:MSTRG.29208.2	bta-miR-4286_R+1	Pi16:ENSRNOT00000000632
lncRNA	Sdhc:MSTRG.8881.1	bta-miR-4286_R+1	Pi16:ENSRNOT00000000632
lncRNA	Zfhx3:MSTRG.14359.1	bta-miR-4286_R+1	Pi16:ENSRNOT00000000632
circRNA	ciRNA56	bta-miR-4286_R+1	Pi16:ENSRNOT00000000632
circRNA	circRNA1488	bta-miR-4286_R+1	Pi16:ENSRNOT00000000632
circRNA	circRNA1571	bta-miR-4286_R+1	Pi16:ENSRNOT00000000632
circRNA	circRNA1578	bta-miR-4286_R+1	Pi16:ENSRNOT00000000632
circRNA	circRNA4490	bta-miR-4286_R+1	Pi16:ENSRNOT00000000632
circRNA	circRNA4510	bta-miR-4286_R+1	Pi16:ENSRNOT00000000632
circRNA	circRNA4520	bta-miR-4286_R+1	Pi16:ENSRNOT00000000632
lncRNA	.:MSTRG.12659.1	bta-miR-4286_R+1	Prelp:ENSRNOT00000079116
lncRNA	.:MSTRG.14147.1	bta-miR-4286_R+1	Prelp:ENSRNOT00000079116
lncRNA	.:MSTRG.15267.1	bta-miR-4286_R+1	Prelp:ENSRNOT00000079116
lncRNA	.:MSTRG.23375.1	bta-miR-4286_R+1	Prelp:ENSRNOT00000079116
lncRNA	.:MSTRG.25540.1	bta-miR-4286_R+1	Prelp:ENSRNOT00000079116
lncRNA	.:MSTRG.26886.1	bta-miR-4286_R+1	Prelp:ENSRNOT00000079116
lncRNA	.:MSTRG.28897.2	bta-miR-4286_R+1	Prelp:ENSRNOT00000079116
lncRNA	AABR07009428:MSTRG.15407.7	bta-miR-4286_R+1	Prelp:ENSRNOT00000079116
lncRNA	AC099449:MSTRG.3498.102	bta-miR-4286_R+1	Prelp:ENSRNOT00000079116
lncRNA	AC099449:MSTRG.3498.108	bta-miR-4286_R+1	Prelp:ENSRNOT00000079116
lncRNA	AC099449:MSTRG.3498.109	bta-miR-4286_R+1	Prelp:ENSRNOT00000079116
lncRNA	AC099449:MSTRG.3498.12	bta-miR-4286_R+1	Prelp:ENSRNOT00000079116
lncRNA	AC099449:MSTRG.3498.125	bta-miR-4286_R+1	Prelp:ENSRNOT00000079116
lncRNA	AC099449:MSTRG.3498.27	bta-miR-4286_R+1	Prelp:ENSRNOT00000079116
lncRNA	AC099449:MSTRG.3498.52	bta-miR-4286_R+1	Prelp:ENSRNOT00000079116
lncRNA	AC099449:MSTRG.3498.63	bta-miR-4286_R+1	Prelp:ENSRNOT00000079116
lncRNA	AC099449:MSTRG.3498.65	bta-miR-4286_R+1	Prelp:ENSRNOT00000079116
lncRNA	AC099449:MSTRG.3498.66	bta-miR-4286_R+1	Prelp:ENSRNOT00000079116
lncRNA	AC099449:MSTRG.3498.67	bta-miR-4286_R+1	Prelp:ENSRNOT00000079116
lncRNA	AC099449:MSTRG.3498.71	bta-miR-4286_R+1	Prelp:ENSRNOT00000079116
lncRNA	AC099449:MSTRG.3498.74	bta-miR-4286_R+1	Prelp:ENSRNOT00000079116
lncRNA	AC099449:MSTRG.3498.92	bta-miR-4286_R+1	Prelp:ENSRNOT00000079116
lncRNA	Ahdc1:MSTRG.23055.1	bta-miR-4286_R+1	Prelp:ENSRNOT00000079116
lncRNA	Bend4:MSTRG.9559.3	bta-miR-4286_R+1	Prelp:ENSRNOT00000079116
lncRNA	Chtop:MSTRG.16142.1	bta-miR-4286_R+1	Prelp:ENSRNOT00000079116
lncRNA	Clint1:MSTRG.4783.3	bta-miR-4286_R+1	Prelp:ENSRNOT00000079116
lncRNA	Ebf1:MSTRG.4748.1	bta-miR-4286_R+1	Prelp:ENSRNOT00000079116
lncRNA	Ebf1:MSTRG.4748.3	bta-miR-4286_R+1	Prelp:ENSRNOT00000079116
lncRNA	Igf1r:MSTRG.2524.2	bta-miR-4286_R+1	Prelp:ENSRNOT00000079116
lncRNA	LOC100910854:ENSRNOT00000083218	bta-miR-4286_R+1	Prelp:ENSRNOT00000079116
lncRNA	LOC689840:MSTRG.26880.1	bta-miR-4286_R+1	Prelp:ENSRNOT00000079116
lncRNA	Mark2:MSTRG.3719.1	bta-miR-4286_R+1	Prelp:ENSRNOT00000079116
lncRNA	Nrp1:MSTRG.14677.2	bta-miR-4286_R+1	Prelp:ENSRNOT00000079116
lncRNA	Pip4p2:MSTRG.21869.3	bta-miR-4286_R+1	Prelp:ENSRNOT00000079116
lncRNA	Satb2:MSTRG.29208.2	bta-miR-4286_R+1	Prelp:ENSRNOT00000079116
lncRNA	Sdhc:MSTRG.8881.1	bta-miR-4286_R+1	Prelp:ENSRNOT00000079116
lncRNA	Zfhx3:MSTRG.14359.1	bta-miR-4286_R+1	Prelp:ENSRNOT00000079116
circRNA	ciRNA56	bta-miR-4286_R+1	Prelp:ENSRNOT00000079116
circRNA	circRNA1488	bta-miR-4286_R+1	Prelp:ENSRNOT00000079116
circRNA	circRNA1571	bta-miR-4286_R+1	Prelp:ENSRNOT00000079116
circRNA	circRNA1578	bta-miR-4286_R+1	Prelp:ENSRNOT00000079116
circRNA	circRNA4490	bta-miR-4286_R+1	Prelp:ENSRNOT00000079116
circRNA	circRNA4510	bta-miR-4286_R+1	Prelp:ENSRNOT00000079116
circRNA	circRNA4520	bta-miR-4286_R+1	Prelp:ENSRNOT00000079116
lncRNA	.:MSTRG.12659.1	bta-miR-4286_R+1	Ror2:ENSRNOT00000090782
lncRNA	.:MSTRG.14147.1	bta-miR-4286_R+1	Ror2:ENSRNOT00000090782
lncRNA	.:MSTRG.15267.1	bta-miR-4286_R+1	Ror2:ENSRNOT00000090782
lncRNA	.:MSTRG.23375.1	bta-miR-4286_R+1	Ror2:ENSRNOT00000090782
lncRNA	.:MSTRG.25540.1	bta-miR-4286_R+1	Ror2:ENSRNOT00000090782
lncRNA	.:MSTRG.26886.1	bta-miR-4286_R+1	Ror2:ENSRNOT00000090782
lncRNA	.:MSTRG.28897.2	bta-miR-4286_R+1	Ror2:ENSRNOT00000090782
lncRNA	AABR07009428:MSTRG.15407.7	bta-miR-4286_R+1	Ror2:ENSRNOT00000090782
lncRNA	AC099449:MSTRG.3498.102	bta-miR-4286_R+1	Ror2:ENSRNOT00000090782
lncRNA	AC099449:MSTRG.3498.108	bta-miR-4286_R+1	Ror2:ENSRNOT00000090782
lncRNA	AC099449:MSTRG.3498.109	bta-miR-4286_R+1	Ror2:ENSRNOT00000090782
lncRNA	AC099449:MSTRG.3498.12	bta-miR-4286_R+1	Ror2:ENSRNOT00000090782
lncRNA	AC099449:MSTRG.3498.125	bta-miR-4286_R+1	Ror2:ENSRNOT00000090782
lncRNA	AC099449:MSTRG.3498.27	bta-miR-4286_R+1	Ror2:ENSRNOT00000090782
lncRNA	AC099449:MSTRG.3498.52	bta-miR-4286_R+1	Ror2:ENSRNOT00000090782
lncRNA	AC099449:MSTRG.3498.63	bta-miR-4286_R+1	Ror2:ENSRNOT00000090782
lncRNA	AC099449:MSTRG.3498.65	bta-miR-4286_R+1	Ror2:ENSRNOT00000090782
lncRNA	AC099449:MSTRG.3498.66	bta-miR-4286_R+1	Ror2:ENSRNOT00000090782
lncRNA	AC099449:MSTRG.3498.67	bta-miR-4286_R+1	Ror2:ENSRNOT00000090782
lncRNA	AC099449:MSTRG.3498.71	bta-miR-4286_R+1	Ror2:ENSRNOT00000090782
lncRNA	AC099449:MSTRG.3498.74	bta-miR-4286_R+1	Ror2:ENSRNOT00000090782
lncRNA	AC099449:MSTRG.3498.92	bta-miR-4286_R+1	Ror2:ENSRNOT00000090782
lncRNA	Ahdc1:MSTRG.23055.1	bta-miR-4286_R+1	Ror2:ENSRNOT00000090782
lncRNA	Bend4:MSTRG.9559.3	bta-miR-4286_R+1	Ror2:ENSRNOT00000090782
lncRNA	Chtop:MSTRG.16142.1	bta-miR-4286_R+1	Ror2:ENSRNOT00000090782
lncRNA	Clint1:MSTRG.4783.3	bta-miR-4286_R+1	Ror2:ENSRNOT00000090782
lncRNA	Ebf1:MSTRG.4748.1	bta-miR-4286_R+1	Ror2:ENSRNOT00000090782
lncRNA	Ebf1:MSTRG.4748.3	bta-miR-4286_R+1	Ror2:ENSRNOT00000090782
lncRNA	Igf1r:MSTRG.2524.2	bta-miR-4286_R+1	Ror2:ENSRNOT00000090782
lncRNA	LOC100910854:ENSRNOT00000083218	bta-miR-4286_R+1	Ror2:ENSRNOT00000090782
lncRNA	LOC689840:MSTRG.26880.1	bta-miR-4286_R+1	Ror2:ENSRNOT00000090782
lncRNA	Mark2:MSTRG.3719.1	bta-miR-4286_R+1	Ror2:ENSRNOT00000090782
lncRNA	Nrp1:MSTRG.14677.2	bta-miR-4286_R+1	Ror2:ENSRNOT00000090782
lncRNA	Pip4p2:MSTRG.21869.3	bta-miR-4286_R+1	Ror2:ENSRNOT00000090782
lncRNA	Satb2:MSTRG.29208.2	bta-miR-4286_R+1	Ror2:ENSRNOT00000090782
lncRNA	Sdhc:MSTRG.8881.1	bta-miR-4286_R+1	Ror2:ENSRNOT00000090782
lncRNA	Zfhx3:MSTRG.14359.1	bta-miR-4286_R+1	Ror2:ENSRNOT00000090782
circRNA	ciRNA56	bta-miR-4286_R+1	Ror2:ENSRNOT00000090782
circRNA	circRNA1488	bta-miR-4286_R+1	Ror2:ENSRNOT00000090782
circRNA	circRNA1571	bta-miR-4286_R+1	Ror2:ENSRNOT00000090782
circRNA	circRNA1578	bta-miR-4286_R+1	Ror2:ENSRNOT00000090782
circRNA	circRNA4490	bta-miR-4286_R+1	Ror2:ENSRNOT00000090782
circRNA	circRNA4510	bta-miR-4286_R+1	Ror2:ENSRNOT00000090782
circRNA	circRNA4520	bta-miR-4286_R+1	Ror2:ENSRNOT00000090782
lncRNA	.:MSTRG.12659.1	bta-miR-4286_R+1	Tdrkh:ENSRNOT00000028299
lncRNA	.:MSTRG.14147.1	bta-miR-4286_R+1	Tdrkh:ENSRNOT00000028299
lncRNA	.:MSTRG.15267.1	bta-miR-4286_R+1	Tdrkh:ENSRNOT00000028299
lncRNA	.:MSTRG.23375.1	bta-miR-4286_R+1	Tdrkh:ENSRNOT00000028299
lncRNA	.:MSTRG.25540.1	bta-miR-4286_R+1	Tdrkh:ENSRNOT00000028299
lncRNA	.:MSTRG.26886.1	bta-miR-4286_R+1	Tdrkh:ENSRNOT00000028299
lncRNA	.:MSTRG.28897.2	bta-miR-4286_R+1	Tdrkh:ENSRNOT00000028299
lncRNA	AABR07009428:MSTRG.15407.7	bta-miR-4286_R+1	Tdrkh:ENSRNOT00000028299
lncRNA	AC099449:MSTRG.3498.102	bta-miR-4286_R+1	Tdrkh:ENSRNOT00000028299
lncRNA	AC099449:MSTRG.3498.108	bta-miR-4286_R+1	Tdrkh:ENSRNOT00000028299
lncRNA	AC099449:MSTRG.3498.109	bta-miR-4286_R+1	Tdrkh:ENSRNOT00000028299
lncRNA	AC099449:MSTRG.3498.12	bta-miR-4286_R+1	Tdrkh:ENSRNOT00000028299
lncRNA	AC099449:MSTRG.3498.125	bta-miR-4286_R+1	Tdrkh:ENSRNOT00000028299
lncRNA	AC099449:MSTRG.3498.27	bta-miR-4286_R+1	Tdrkh:ENSRNOT00000028299
lncRNA	AC099449:MSTRG.3498.52	bta-miR-4286_R+1	Tdrkh:ENSRNOT00000028299
lncRNA	AC099449:MSTRG.3498.63	bta-miR-4286_R+1	Tdrkh:ENSRNOT00000028299
lncRNA	AC099449:MSTRG.3498.65	bta-miR-4286_R+1	Tdrkh:ENSRNOT00000028299
lncRNA	AC099449:MSTRG.3498.66	bta-miR-4286_R+1	Tdrkh:ENSRNOT00000028299
lncRNA	AC099449:MSTRG.3498.67	bta-miR-4286_R+1	Tdrkh:ENSRNOT00000028299
lncRNA	AC099449:MSTRG.3498.71	bta-miR-4286_R+1	Tdrkh:ENSRNOT00000028299
lncRNA	AC099449:MSTRG.3498.74	bta-miR-4286_R+1	Tdrkh:ENSRNOT00000028299
lncRNA	AC099449:MSTRG.3498.92	bta-miR-4286_R+1	Tdrkh:ENSRNOT00000028299
lncRNA	Ahdc1:MSTRG.23055.1	bta-miR-4286_R+1	Tdrkh:ENSRNOT00000028299
lncRNA	Bend4:MSTRG.9559.3	bta-miR-4286_R+1	Tdrkh:ENSRNOT00000028299
lncRNA	Chtop:MSTRG.16142.1	bta-miR-4286_R+1	Tdrkh:ENSRNOT00000028299
lncRNA	Clint1:MSTRG.4783.3	bta-miR-4286_R+1	Tdrkh:ENSRNOT00000028299
lncRNA	Ebf1:MSTRG.4748.1	bta-miR-4286_R+1	Tdrkh:ENSRNOT00000028299
lncRNA	Ebf1:MSTRG.4748.3	bta-miR-4286_R+1	Tdrkh:ENSRNOT00000028299
lncRNA	Igf1r:MSTRG.2524.2	bta-miR-4286_R+1	Tdrkh:ENSRNOT00000028299
lncRNA	LOC100910854:ENSRNOT00000083218	bta-miR-4286_R+1	Tdrkh:ENSRNOT00000028299
lncRNA	LOC689840:MSTRG.26880.1	bta-miR-4286_R+1	Tdrkh:ENSRNOT00000028299
lncRNA	Mark2:MSTRG.3719.1	bta-miR-4286_R+1	Tdrkh:ENSRNOT00000028299
lncRNA	Nrp1:MSTRG.14677.2	bta-miR-4286_R+1	Tdrkh:ENSRNOT00000028299
lncRNA	Pip4p2:MSTRG.21869.3	bta-miR-4286_R+1	Tdrkh:ENSRNOT00000028299
lncRNA	Satb2:MSTRG.29208.2	bta-miR-4286_R+1	Tdrkh:ENSRNOT00000028299
lncRNA	Sdhc:MSTRG.8881.1	bta-miR-4286_R+1	Tdrkh:ENSRNOT00000028299
lncRNA	Zfhx3:MSTRG.14359.1	bta-miR-4286_R+1	Tdrkh:ENSRNOT00000028299
circRNA	ciRNA56	bta-miR-4286_R+1	Tdrkh:ENSRNOT00000028299
circRNA	circRNA1488	bta-miR-4286_R+1	Tdrkh:ENSRNOT00000028299
circRNA	circRNA1571	bta-miR-4286_R+1	Tdrkh:ENSRNOT00000028299
circRNA	circRNA1578	bta-miR-4286_R+1	Tdrkh:ENSRNOT00000028299
circRNA	circRNA4490	bta-miR-4286_R+1	Tdrkh:ENSRNOT00000028299
circRNA	circRNA4510	bta-miR-4286_R+1	Tdrkh:ENSRNOT00000028299
circRNA	circRNA4520	bta-miR-4286_R+1	Tdrkh:ENSRNOT00000028299
lncRNA	.:MSTRG.12659.1	bta-miR-4286_R+1	Uhrf2:ENSRNOT00000015406
lncRNA	.:MSTRG.14147.1	bta-miR-4286_R+1	Uhrf2:ENSRNOT00000015406
lncRNA	.:MSTRG.15267.1	bta-miR-4286_R+1	Uhrf2:ENSRNOT00000015406
lncRNA	.:MSTRG.23375.1	bta-miR-4286_R+1	Uhrf2:ENSRNOT00000015406
lncRNA	.:MSTRG.25540.1	bta-miR-4286_R+1	Uhrf2:ENSRNOT00000015406
lncRNA	.:MSTRG.26886.1	bta-miR-4286_R+1	Uhrf2:ENSRNOT00000015406
lncRNA	.:MSTRG.28897.2	bta-miR-4286_R+1	Uhrf2:ENSRNOT00000015406
lncRNA	AABR07009428:MSTRG.15407.7	bta-miR-4286_R+1	Uhrf2:ENSRNOT00000015406
lncRNA	AC099449:MSTRG.3498.102	bta-miR-4286_R+1	Uhrf2:ENSRNOT00000015406
lncRNA	AC099449:MSTRG.3498.108	bta-miR-4286_R+1	Uhrf2:ENSRNOT00000015406
lncRNA	AC099449:MSTRG.3498.109	bta-miR-4286_R+1	Uhrf2:ENSRNOT00000015406
lncRNA	AC099449:MSTRG.3498.12	bta-miR-4286_R+1	Uhrf2:ENSRNOT00000015406
lncRNA	AC099449:MSTRG.3498.125	bta-miR-4286_R+1	Uhrf2:ENSRNOT00000015406
lncRNA	AC099449:MSTRG.3498.27	bta-miR-4286_R+1	Uhrf2:ENSRNOT00000015406
lncRNA	AC099449:MSTRG.3498.52	bta-miR-4286_R+1	Uhrf2:ENSRNOT00000015406
lncRNA	AC099449:MSTRG.3498.63	bta-miR-4286_R+1	Uhrf2:ENSRNOT00000015406
lncRNA	AC099449:MSTRG.3498.65	bta-miR-4286_R+1	Uhrf2:ENSRNOT00000015406
lncRNA	AC099449:MSTRG.3498.66	bta-miR-4286_R+1	Uhrf2:ENSRNOT00000015406
lncRNA	AC099449:MSTRG.3498.67	bta-miR-4286_R+1	Uhrf2:ENSRNOT00000015406
lncRNA	AC099449:MSTRG.3498.71	bta-miR-4286_R+1	Uhrf2:ENSRNOT00000015406
lncRNA	AC099449:MSTRG.3498.74	bta-miR-4286_R+1	Uhrf2:ENSRNOT00000015406
lncRNA	AC099449:MSTRG.3498.92	bta-miR-4286_R+1	Uhrf2:ENSRNOT00000015406
lncRNA	Ahdc1:MSTRG.23055.1	bta-miR-4286_R+1	Uhrf2:ENSRNOT00000015406
lncRNA	Bend4:MSTRG.9559.3	bta-miR-4286_R+1	Uhrf2:ENSRNOT00000015406
lncRNA	Chtop:MSTRG.16142.1	bta-miR-4286_R+1	Uhrf2:ENSRNOT00000015406
lncRNA	Clint1:MSTRG.4783.3	bta-miR-4286_R+1	Uhrf2:ENSRNOT00000015406
lncRNA	Ebf1:MSTRG.4748.1	bta-miR-4286_R+1	Uhrf2:ENSRNOT00000015406
lncRNA	Ebf1:MSTRG.4748.3	bta-miR-4286_R+1	Uhrf2:ENSRNOT00000015406
lncRNA	Igf1r:MSTRG.2524.2	bta-miR-4286_R+1	Uhrf2:ENSRNOT00000015406
lncRNA	LOC100910854:ENSRNOT00000083218	bta-miR-4286_R+1	Uhrf2:ENSRNOT00000015406
lncRNA	LOC689840:MSTRG.26880.1	bta-miR-4286_R+1	Uhrf2:ENSRNOT00000015406
lncRNA	Mark2:MSTRG.3719.1	bta-miR-4286_R+1	Uhrf2:ENSRNOT00000015406
lncRNA	Nrp1:MSTRG.14677.2	bta-miR-4286_R+1	Uhrf2:ENSRNOT00000015406
lncRNA	Pip4p2:MSTRG.21869.3	bta-miR-4286_R+1	Uhrf2:ENSRNOT00000015406
lncRNA	Satb2:MSTRG.29208.2	bta-miR-4286_R+1	Uhrf2:ENSRNOT00000015406
lncRNA	Sdhc:MSTRG.8881.1	bta-miR-4286_R+1	Uhrf2:ENSRNOT00000015406
lncRNA	Zfhx3:MSTRG.14359.1	bta-miR-4286_R+1	Uhrf2:ENSRNOT00000015406
circRNA	ciRNA56	bta-miR-4286_R+1	Uhrf2:ENSRNOT00000015406
circRNA	circRNA1488	bta-miR-4286_R+1	Uhrf2:ENSRNOT00000015406
circRNA	circRNA1571	bta-miR-4286_R+1	Uhrf2:ENSRNOT00000015406
circRNA	circRNA1578	bta-miR-4286_R+1	Uhrf2:ENSRNOT00000015406
circRNA	circRNA4490	bta-miR-4286_R+1	Uhrf2:ENSRNOT00000015406
circRNA	circRNA4510	bta-miR-4286_R+1	Uhrf2:ENSRNOT00000015406
circRNA	circRNA4520	bta-miR-4286_R+1	Uhrf2:ENSRNOT00000015406
lncRNA	.:MSTRG.12659.1	bta-miR-4286_R+1	Wnk1:ENSRNOT00000013355
lncRNA	.:MSTRG.14147.1	bta-miR-4286_R+1	Wnk1:ENSRNOT00000013355
lncRNA	.:MSTRG.15267.1	bta-miR-4286_R+1	Wnk1:ENSRNOT00000013355
lncRNA	.:MSTRG.23375.1	bta-miR-4286_R+1	Wnk1:ENSRNOT00000013355
lncRNA	.:MSTRG.25540.1	bta-miR-4286_R+1	Wnk1:ENSRNOT00000013355
lncRNA	.:MSTRG.26886.1	bta-miR-4286_R+1	Wnk1:ENSRNOT00000013355
lncRNA	.:MSTRG.28897.2	bta-miR-4286_R+1	Wnk1:ENSRNOT00000013355
lncRNA	AABR07009428:MSTRG.15407.7	bta-miR-4286_R+1	Wnk1:ENSRNOT00000013355
lncRNA	AC099449:MSTRG.3498.102	bta-miR-4286_R+1	Wnk1:ENSRNOT00000013355
lncRNA	AC099449:MSTRG.3498.108	bta-miR-4286_R+1	Wnk1:ENSRNOT00000013355
lncRNA	AC099449:MSTRG.3498.109	bta-miR-4286_R+1	Wnk1:ENSRNOT00000013355
lncRNA	AC099449:MSTRG.3498.12	bta-miR-4286_R+1	Wnk1:ENSRNOT00000013355
lncRNA	AC099449:MSTRG.3498.125	bta-miR-4286_R+1	Wnk1:ENSRNOT00000013355
lncRNA	AC099449:MSTRG.3498.27	bta-miR-4286_R+1	Wnk1:ENSRNOT00000013355
lncRNA	AC099449:MSTRG.3498.52	bta-miR-4286_R+1	Wnk1:ENSRNOT00000013355
lncRNA	AC099449:MSTRG.3498.63	bta-miR-4286_R+1	Wnk1:ENSRNOT00000013355
lncRNA	AC099449:MSTRG.3498.65	bta-miR-4286_R+1	Wnk1:ENSRNOT00000013355
lncRNA	AC099449:MSTRG.3498.66	bta-miR-4286_R+1	Wnk1:ENSRNOT00000013355
lncRNA	AC099449:MSTRG.3498.67	bta-miR-4286_R+1	Wnk1:ENSRNOT00000013355
lncRNA	AC099449:MSTRG.3498.71	bta-miR-4286_R+1	Wnk1:ENSRNOT00000013355
lncRNA	AC099449:MSTRG.3498.74	bta-miR-4286_R+1	Wnk1:ENSRNOT00000013355
lncRNA	AC099449:MSTRG.3498.92	bta-miR-4286_R+1	Wnk1:ENSRNOT00000013355
lncRNA	Ahdc1:MSTRG.23055.1	bta-miR-4286_R+1	Wnk1:ENSRNOT00000013355
lncRNA	Bend4:MSTRG.9559.3	bta-miR-4286_R+1	Wnk1:ENSRNOT00000013355
lncRNA	Chtop:MSTRG.16142.1	bta-miR-4286_R+1	Wnk1:ENSRNOT00000013355
lncRNA	Clint1:MSTRG.4783.3	bta-miR-4286_R+1	Wnk1:ENSRNOT00000013355
lncRNA	Ebf1:MSTRG.4748.1	bta-miR-4286_R+1	Wnk1:ENSRNOT00000013355
lncRNA	Ebf1:MSTRG.4748.3	bta-miR-4286_R+1	Wnk1:ENSRNOT00000013355
lncRNA	Igf1r:MSTRG.2524.2	bta-miR-4286_R+1	Wnk1:ENSRNOT00000013355
lncRNA	LOC100910854:ENSRNOT00000083218	bta-miR-4286_R+1	Wnk1:ENSRNOT00000013355
lncRNA	LOC689840:MSTRG.26880.1	bta-miR-4286_R+1	Wnk1:ENSRNOT00000013355
lncRNA	Mark2:MSTRG.3719.1	bta-miR-4286_R+1	Wnk1:ENSRNOT00000013355
lncRNA	Nrp1:MSTRG.14677.2	bta-miR-4286_R+1	Wnk1:ENSRNOT00000013355
lncRNA	Pip4p2:MSTRG.21869.3	bta-miR-4286_R+1	Wnk1:ENSRNOT00000013355
lncRNA	Satb2:MSTRG.29208.2	bta-miR-4286_R+1	Wnk1:ENSRNOT00000013355
lncRNA	Sdhc:MSTRG.8881.1	bta-miR-4286_R+1	Wnk1:ENSRNOT00000013355
lncRNA	Zfhx3:MSTRG.14359.1	bta-miR-4286_R+1	Wnk1:ENSRNOT00000013355
circRNA	ciRNA56	bta-miR-4286_R+1	Wnk1:ENSRNOT00000013355
circRNA	circRNA1488	bta-miR-4286_R+1	Wnk1:ENSRNOT00000013355
circRNA	circRNA1571	bta-miR-4286_R+1	Wnk1:ENSRNOT00000013355
circRNA	circRNA1578	bta-miR-4286_R+1	Wnk1:ENSRNOT00000013355
circRNA	circRNA4490	bta-miR-4286_R+1	Wnk1:ENSRNOT00000013355
circRNA	circRNA4510	bta-miR-4286_R+1	Wnk1:ENSRNOT00000013355
circRNA	circRNA4520	bta-miR-4286_R+1	Wnk1:ENSRNOT00000013355
lncRNA	.:MSTRG.218.2	bta-miR-92a_R+2	Ddi2:ENSRNOT00000076160
lncRNA	.:MSTRG.28897.2	bta-miR-92a_R+2	Ddi2:ENSRNOT00000076160
lncRNA	.:MSTRG.29097.2	bta-miR-92a_R+2	Ddi2:ENSRNOT00000076160
lncRNA	.:MSTRG.3656.7	bta-miR-92a_R+2	Ddi2:ENSRNOT00000076160
lncRNA	.:MSTRG.9706.2	bta-miR-92a_R+2	Ddi2:ENSRNOT00000076160
lncRNA	AC127084:ENSRNOT00000076715	bta-miR-92a_R+2	Ddi2:ENSRNOT00000076160
lncRNA	AC134224:MSTRG.3657.1	bta-miR-92a_R+2	Ddi2:ENSRNOT00000076160
lncRNA	Col13a1:MSTRG.17444.1	bta-miR-92a_R+2	Ddi2:ENSRNOT00000076160
lncRNA	Ebf1:MSTRG.4748.1	bta-miR-92a_R+2	Ddi2:ENSRNOT00000076160
lncRNA	Ebf1:MSTRG.4748.3	bta-miR-92a_R+2	Ddi2:ENSRNOT00000076160
lncRNA	Gli3:MSTRG.12666.3	bta-miR-92a_R+2	Ddi2:ENSRNOT00000076160
lncRNA	Jmjd1c:MSTRG.17326.2	bta-miR-92a_R+2	Ddi2:ENSRNOT00000076160
lncRNA	LOC689840:MSTRG.26880.1	bta-miR-92a_R+2	Ddi2:ENSRNOT00000076160
lncRNA	Satb2:MSTRG.29208.2	bta-miR-92a_R+2	Ddi2:ENSRNOT00000076160
lncRNA	Stt3b:MSTRG.28309.1	bta-miR-92a_R+2	Ddi2:ENSRNOT00000076160
lncRNA	U1:MSTRG.24099.1	bta-miR-92a_R+2	Ddi2:ENSRNOT00000076160
circRNA	ciRNA166	bta-miR-92a_R+2	Ddi2:ENSRNOT00000076160
circRNA	ciRNA56	bta-miR-92a_R+2	Ddi2:ENSRNOT00000076160
circRNA	circRNA1571	bta-miR-92a_R+2	Ddi2:ENSRNOT00000076160
circRNA	circRNA1578	bta-miR-92a_R+2	Ddi2:ENSRNOT00000076160
circRNA	circRNA4510	bta-miR-92a_R+2	Ddi2:ENSRNOT00000076160
circRNA	circRNA4520	bta-miR-92a_R+2	Ddi2:ENSRNOT00000076160
lncRNA	.:MSTRG.218.2	bta-miR-92a_R+2	Dennd2c:ENSRNOT00000025365
lncRNA	.:MSTRG.28897.2	bta-miR-92a_R+2	Dennd2c:ENSRNOT00000025365
lncRNA	.:MSTRG.29097.2	bta-miR-92a_R+2	Dennd2c:ENSRNOT00000025365
lncRNA	.:MSTRG.3656.7	bta-miR-92a_R+2	Dennd2c:ENSRNOT00000025365
lncRNA	.:MSTRG.9706.2	bta-miR-92a_R+2	Dennd2c:ENSRNOT00000025365
lncRNA	AC127084:ENSRNOT00000076715	bta-miR-92a_R+2	Dennd2c:ENSRNOT00000025365
lncRNA	AC134224:MSTRG.3657.1	bta-miR-92a_R+2	Dennd2c:ENSRNOT00000025365
lncRNA	Col13a1:MSTRG.17444.1	bta-miR-92a_R+2	Dennd2c:ENSRNOT00000025365
lncRNA	Ebf1:MSTRG.4748.1	bta-miR-92a_R+2	Dennd2c:ENSRNOT00000025365
lncRNA	Ebf1:MSTRG.4748.3	bta-miR-92a_R+2	Dennd2c:ENSRNOT00000025365
lncRNA	Gli3:MSTRG.12666.3	bta-miR-92a_R+2	Dennd2c:ENSRNOT00000025365
lncRNA	Jmjd1c:MSTRG.17326.2	bta-miR-92a_R+2	Dennd2c:ENSRNOT00000025365
lncRNA	LOC689840:MSTRG.26880.1	bta-miR-92a_R+2	Dennd2c:ENSRNOT00000025365
lncRNA	Satb2:MSTRG.29208.2	bta-miR-92a_R+2	Dennd2c:ENSRNOT00000025365
lncRNA	Stt3b:MSTRG.28309.1	bta-miR-92a_R+2	Dennd2c:ENSRNOT00000025365
lncRNA	U1:MSTRG.24099.1	bta-miR-92a_R+2	Dennd2c:ENSRNOT00000025365
circRNA	ciRNA166	bta-miR-92a_R+2	Dennd2c:ENSRNOT00000025365
circRNA	ciRNA56	bta-miR-92a_R+2	Dennd2c:ENSRNOT00000025365
circRNA	circRNA1571	bta-miR-92a_R+2	Dennd2c:ENSRNOT00000025365
circRNA	circRNA1578	bta-miR-92a_R+2	Dennd2c:ENSRNOT00000025365
circRNA	circRNA4510	bta-miR-92a_R+2	Dennd2c:ENSRNOT00000025365
circRNA	circRNA4520	bta-miR-92a_R+2	Dennd2c:ENSRNOT00000025365
lncRNA	.:MSTRG.218.2	bta-miR-92a_R+2	Dnmt3a:ENSRNOT00000047210
lncRNA	.:MSTRG.28897.2	bta-miR-92a_R+2	Dnmt3a:ENSRNOT00000047210
lncRNA	.:MSTRG.29097.2	bta-miR-92a_R+2	Dnmt3a:ENSRNOT00000047210
lncRNA	.:MSTRG.3656.7	bta-miR-92a_R+2	Dnmt3a:ENSRNOT00000047210
lncRNA	.:MSTRG.9706.2	bta-miR-92a_R+2	Dnmt3a:ENSRNOT00000047210
lncRNA	AC127084:ENSRNOT00000076715	bta-miR-92a_R+2	Dnmt3a:ENSRNOT00000047210
lncRNA	AC134224:MSTRG.3657.1	bta-miR-92a_R+2	Dnmt3a:ENSRNOT00000047210
lncRNA	Col13a1:MSTRG.17444.1	bta-miR-92a_R+2	Dnmt3a:ENSRNOT00000047210
lncRNA	Ebf1:MSTRG.4748.1	bta-miR-92a_R+2	Dnmt3a:ENSRNOT00000047210
lncRNA	Ebf1:MSTRG.4748.3	bta-miR-92a_R+2	Dnmt3a:ENSRNOT00000047210
lncRNA	Gli3:MSTRG.12666.3	bta-miR-92a_R+2	Dnmt3a:ENSRNOT00000047210
lncRNA	Jmjd1c:MSTRG.17326.2	bta-miR-92a_R+2	Dnmt3a:ENSRNOT00000047210
lncRNA	LOC689840:MSTRG.26880.1	bta-miR-92a_R+2	Dnmt3a:ENSRNOT00000047210
lncRNA	Satb2:MSTRG.29208.2	bta-miR-92a_R+2	Dnmt3a:ENSRNOT00000047210
lncRNA	Stt3b:MSTRG.28309.1	bta-miR-92a_R+2	Dnmt3a:ENSRNOT00000047210
lncRNA	U1:MSTRG.24099.1	bta-miR-92a_R+2	Dnmt3a:ENSRNOT00000047210
circRNA	ciRNA166	bta-miR-92a_R+2	Dnmt3a:ENSRNOT00000047210
circRNA	ciRNA56	bta-miR-92a_R+2	Dnmt3a:ENSRNOT00000047210
circRNA	circRNA1571	bta-miR-92a_R+2	Dnmt3a:ENSRNOT00000047210
circRNA	circRNA1578	bta-miR-92a_R+2	Dnmt3a:ENSRNOT00000047210
circRNA	circRNA4510	bta-miR-92a_R+2	Dnmt3a:ENSRNOT00000047210
circRNA	circRNA4520	bta-miR-92a_R+2	Dnmt3a:ENSRNOT00000047210
lncRNA	.:MSTRG.218.2	bta-miR-92a_R+2	Dock9:ENSRNOT00000064705
lncRNA	.:MSTRG.28897.2	bta-miR-92a_R+2	Dock9:ENSRNOT00000064705
lncRNA	.:MSTRG.29097.2	bta-miR-92a_R+2	Dock9:ENSRNOT00000064705
lncRNA	.:MSTRG.3656.7	bta-miR-92a_R+2	Dock9:ENSRNOT00000064705
lncRNA	.:MSTRG.9706.2	bta-miR-92a_R+2	Dock9:ENSRNOT00000064705
lncRNA	AC127084:ENSRNOT00000076715	bta-miR-92a_R+2	Dock9:ENSRNOT00000064705
lncRNA	AC134224:MSTRG.3657.1	bta-miR-92a_R+2	Dock9:ENSRNOT00000064705
lncRNA	Col13a1:MSTRG.17444.1	bta-miR-92a_R+2	Dock9:ENSRNOT00000064705
lncRNA	Ebf1:MSTRG.4748.1	bta-miR-92a_R+2	Dock9:ENSRNOT00000064705
lncRNA	Ebf1:MSTRG.4748.3	bta-miR-92a_R+2	Dock9:ENSRNOT00000064705
lncRNA	Gli3:MSTRG.12666.3	bta-miR-92a_R+2	Dock9:ENSRNOT00000064705
lncRNA	Jmjd1c:MSTRG.17326.2	bta-miR-92a_R+2	Dock9:ENSRNOT00000064705
lncRNA	LOC689840:MSTRG.26880.1	bta-miR-92a_R+2	Dock9:ENSRNOT00000064705
lncRNA	Satb2:MSTRG.29208.2	bta-miR-92a_R+2	Dock9:ENSRNOT00000064705
lncRNA	Stt3b:MSTRG.28309.1	bta-miR-92a_R+2	Dock9:ENSRNOT00000064705
lncRNA	U1:MSTRG.24099.1	bta-miR-92a_R+2	Dock9:ENSRNOT00000064705
circRNA	ciRNA166	bta-miR-92a_R+2	Dock9:ENSRNOT00000064705
circRNA	ciRNA56	bta-miR-92a_R+2	Dock9:ENSRNOT00000064705
circRNA	circRNA1571	bta-miR-92a_R+2	Dock9:ENSRNOT00000064705
circRNA	circRNA1578	bta-miR-92a_R+2	Dock9:ENSRNOT00000064705
circRNA	circRNA4510	bta-miR-92a_R+2	Dock9:ENSRNOT00000064705
circRNA	circRNA4520	bta-miR-92a_R+2	Dock9:ENSRNOT00000064705
lncRNA	.:MSTRG.218.2	bta-miR-92a_R+2	Gxylt1:ENSRNOT00000058349
lncRNA	.:MSTRG.28897.2	bta-miR-92a_R+2	Gxylt1:ENSRNOT00000058349
lncRNA	.:MSTRG.29097.2	bta-miR-92a_R+2	Gxylt1:ENSRNOT00000058349
lncRNA	.:MSTRG.3656.7	bta-miR-92a_R+2	Gxylt1:ENSRNOT00000058349
lncRNA	.:MSTRG.9706.2	bta-miR-92a_R+2	Gxylt1:ENSRNOT00000058349
lncRNA	AC127084:ENSRNOT00000076715	bta-miR-92a_R+2	Gxylt1:ENSRNOT00000058349
lncRNA	AC134224:MSTRG.3657.1	bta-miR-92a_R+2	Gxylt1:ENSRNOT00000058349
lncRNA	Col13a1:MSTRG.17444.1	bta-miR-92a_R+2	Gxylt1:ENSRNOT00000058349
lncRNA	Ebf1:MSTRG.4748.1	bta-miR-92a_R+2	Gxylt1:ENSRNOT00000058349
lncRNA	Ebf1:MSTRG.4748.3	bta-miR-92a_R+2	Gxylt1:ENSRNOT00000058349
lncRNA	Gli3:MSTRG.12666.3	bta-miR-92a_R+2	Gxylt1:ENSRNOT00000058349
lncRNA	Jmjd1c:MSTRG.17326.2	bta-miR-92a_R+2	Gxylt1:ENSRNOT00000058349
lncRNA	LOC689840:MSTRG.26880.1	bta-miR-92a_R+2	Gxylt1:ENSRNOT00000058349
lncRNA	Satb2:MSTRG.29208.2	bta-miR-92a_R+2	Gxylt1:ENSRNOT00000058349
lncRNA	Stt3b:MSTRG.28309.1	bta-miR-92a_R+2	Gxylt1:ENSRNOT00000058349
lncRNA	U1:MSTRG.24099.1	bta-miR-92a_R+2	Gxylt1:ENSRNOT00000058349
circRNA	ciRNA166	bta-miR-92a_R+2	Gxylt1:ENSRNOT00000058349
circRNA	ciRNA56	bta-miR-92a_R+2	Gxylt1:ENSRNOT00000058349
circRNA	circRNA1571	bta-miR-92a_R+2	Gxylt1:ENSRNOT00000058349
circRNA	circRNA1578	bta-miR-92a_R+2	Gxylt1:ENSRNOT00000058349
circRNA	circRNA4510	bta-miR-92a_R+2	Gxylt1:ENSRNOT00000058349
circRNA	circRNA4520	bta-miR-92a_R+2	Gxylt1:ENSRNOT00000058349
lncRNA	.:MSTRG.218.2	bta-miR-92a_R+2	Mff:ENSRNOT00000020705
lncRNA	.:MSTRG.28897.2	bta-miR-92a_R+2	Mff:ENSRNOT00000020705
lncRNA	.:MSTRG.29097.2	bta-miR-92a_R+2	Mff:ENSRNOT00000020705
lncRNA	.:MSTRG.3656.7	bta-miR-92a_R+2	Mff:ENSRNOT00000020705
lncRNA	.:MSTRG.9706.2	bta-miR-92a_R+2	Mff:ENSRNOT00000020705
lncRNA	AC127084:ENSRNOT00000076715	bta-miR-92a_R+2	Mff:ENSRNOT00000020705
lncRNA	AC134224:MSTRG.3657.1	bta-miR-92a_R+2	Mff:ENSRNOT00000020705
lncRNA	Col13a1:MSTRG.17444.1	bta-miR-92a_R+2	Mff:ENSRNOT00000020705
lncRNA	Ebf1:MSTRG.4748.1	bta-miR-92a_R+2	Mff:ENSRNOT00000020705
lncRNA	Ebf1:MSTRG.4748.3	bta-miR-92a_R+2	Mff:ENSRNOT00000020705
lncRNA	Gli3:MSTRG.12666.3	bta-miR-92a_R+2	Mff:ENSRNOT00000020705
lncRNA	Jmjd1c:MSTRG.17326.2	bta-miR-92a_R+2	Mff:ENSRNOT00000020705
lncRNA	LOC689840:MSTRG.26880.1	bta-miR-92a_R+2	Mff:ENSRNOT00000020705
lncRNA	Satb2:MSTRG.29208.2	bta-miR-92a_R+2	Mff:ENSRNOT00000020705
lncRNA	Stt3b:MSTRG.28309.1	bta-miR-92a_R+2	Mff:ENSRNOT00000020705
lncRNA	U1:MSTRG.24099.1	bta-miR-92a_R+2	Mff:ENSRNOT00000020705
circRNA	ciRNA166	bta-miR-92a_R+2	Mff:ENSRNOT00000020705
circRNA	ciRNA56	bta-miR-92a_R+2	Mff:ENSRNOT00000020705
circRNA	circRNA1571	bta-miR-92a_R+2	Mff:ENSRNOT00000020705
circRNA	circRNA1578	bta-miR-92a_R+2	Mff:ENSRNOT00000020705
circRNA	circRNA4510	bta-miR-92a_R+2	Mff:ENSRNOT00000020705
circRNA	circRNA4520	bta-miR-92a_R+2	Mff:ENSRNOT00000020705
lncRNA	.:MSTRG.218.2	bta-miR-92a_R+2	NEWGENE_621351:ENSRNOT00000087619
lncRNA	.:MSTRG.28897.2	bta-miR-92a_R+2	NEWGENE_621351:ENSRNOT00000087619
lncRNA	.:MSTRG.29097.2	bta-miR-92a_R+2	NEWGENE_621351:ENSRNOT00000087619
lncRNA	.:MSTRG.3656.7	bta-miR-92a_R+2	NEWGENE_621351:ENSRNOT00000087619
lncRNA	.:MSTRG.9706.2	bta-miR-92a_R+2	NEWGENE_621351:ENSRNOT00000087619
lncRNA	AC127084:ENSRNOT00000076715	bta-miR-92a_R+2	NEWGENE_621351:ENSRNOT00000087619
lncRNA	AC134224:MSTRG.3657.1	bta-miR-92a_R+2	NEWGENE_621351:ENSRNOT00000087619
lncRNA	Col13a1:MSTRG.17444.1	bta-miR-92a_R+2	NEWGENE_621351:ENSRNOT00000087619
lncRNA	Ebf1:MSTRG.4748.1	bta-miR-92a_R+2	NEWGENE_621351:ENSRNOT00000087619
lncRNA	Ebf1:MSTRG.4748.3	bta-miR-92a_R+2	NEWGENE_621351:ENSRNOT00000087619
lncRNA	Gli3:MSTRG.12666.3	bta-miR-92a_R+2	NEWGENE_621351:ENSRNOT00000087619
lncRNA	Jmjd1c:MSTRG.17326.2	bta-miR-92a_R+2	NEWGENE_621351:ENSRNOT00000087619
lncRNA	LOC689840:MSTRG.26880.1	bta-miR-92a_R+2	NEWGENE_621351:ENSRNOT00000087619
lncRNA	Satb2:MSTRG.29208.2	bta-miR-92a_R+2	NEWGENE_621351:ENSRNOT00000087619
lncRNA	Stt3b:MSTRG.28309.1	bta-miR-92a_R+2	NEWGENE_621351:ENSRNOT00000087619
lncRNA	U1:MSTRG.24099.1	bta-miR-92a_R+2	NEWGENE_621351:ENSRNOT00000087619
circRNA	ciRNA166	bta-miR-92a_R+2	NEWGENE_621351:ENSRNOT00000087619
circRNA	ciRNA56	bta-miR-92a_R+2	NEWGENE_621351:ENSRNOT00000087619
circRNA	circRNA1571	bta-miR-92a_R+2	NEWGENE_621351:ENSRNOT00000087619
circRNA	circRNA1578	bta-miR-92a_R+2	NEWGENE_621351:ENSRNOT00000087619
circRNA	circRNA4510	bta-miR-92a_R+2	NEWGENE_621351:ENSRNOT00000087619
circRNA	circRNA4520	bta-miR-92a_R+2	NEWGENE_621351:ENSRNOT00000087619
lncRNA	.:MSTRG.218.2	bta-miR-92a_R+2	Nrf1:ENSRNOT00000080173
lncRNA	.:MSTRG.28897.2	bta-miR-92a_R+2	Nrf1:ENSRNOT00000080173
lncRNA	.:MSTRG.29097.2	bta-miR-92a_R+2	Nrf1:ENSRNOT00000080173
lncRNA	.:MSTRG.3656.7	bta-miR-92a_R+2	Nrf1:ENSRNOT00000080173
lncRNA	.:MSTRG.9706.2	bta-miR-92a_R+2	Nrf1:ENSRNOT00000080173
lncRNA	AC127084:ENSRNOT00000076715	bta-miR-92a_R+2	Nrf1:ENSRNOT00000080173
lncRNA	AC134224:MSTRG.3657.1	bta-miR-92a_R+2	Nrf1:ENSRNOT00000080173
lncRNA	Col13a1:MSTRG.17444.1	bta-miR-92a_R+2	Nrf1:ENSRNOT00000080173
lncRNA	Ebf1:MSTRG.4748.1	bta-miR-92a_R+2	Nrf1:ENSRNOT00000080173
lncRNA	Ebf1:MSTRG.4748.3	bta-miR-92a_R+2	Nrf1:ENSRNOT00000080173
lncRNA	Gli3:MSTRG.12666.3	bta-miR-92a_R+2	Nrf1:ENSRNOT00000080173
lncRNA	Jmjd1c:MSTRG.17326.2	bta-miR-92a_R+2	Nrf1:ENSRNOT00000080173
lncRNA	LOC689840:MSTRG.26880.1	bta-miR-92a_R+2	Nrf1:ENSRNOT00000080173
lncRNA	Satb2:MSTRG.29208.2	bta-miR-92a_R+2	Nrf1:ENSRNOT00000080173
lncRNA	Stt3b:MSTRG.28309.1	bta-miR-92a_R+2	Nrf1:ENSRNOT00000080173
lncRNA	U1:MSTRG.24099.1	bta-miR-92a_R+2	Nrf1:ENSRNOT00000080173
circRNA	ciRNA166	bta-miR-92a_R+2	Nrf1:ENSRNOT00000080173
circRNA	ciRNA56	bta-miR-92a_R+2	Nrf1:ENSRNOT00000080173
circRNA	circRNA1571	bta-miR-92a_R+2	Nrf1:ENSRNOT00000080173
circRNA	circRNA1578	bta-miR-92a_R+2	Nrf1:ENSRNOT00000080173
circRNA	circRNA4510	bta-miR-92a_R+2	Nrf1:ENSRNOT00000080173
circRNA	circRNA4520	bta-miR-92a_R+2	Nrf1:ENSRNOT00000080173
lncRNA	.:MSTRG.218.2	bta-miR-92a_R+2	RGD1307100:ENSRNOT00000075947
lncRNA	.:MSTRG.28897.2	bta-miR-92a_R+2	RGD1307100:ENSRNOT00000075947
lncRNA	.:MSTRG.29097.2	bta-miR-92a_R+2	RGD1307100:ENSRNOT00000075947
lncRNA	.:MSTRG.3656.7	bta-miR-92a_R+2	RGD1307100:ENSRNOT00000075947
lncRNA	.:MSTRG.9706.2	bta-miR-92a_R+2	RGD1307100:ENSRNOT00000075947
lncRNA	AC127084:ENSRNOT00000076715	bta-miR-92a_R+2	RGD1307100:ENSRNOT00000075947
lncRNA	AC134224:MSTRG.3657.1	bta-miR-92a_R+2	RGD1307100:ENSRNOT00000075947
lncRNA	Col13a1:MSTRG.17444.1	bta-miR-92a_R+2	RGD1307100:ENSRNOT00000075947
lncRNA	Ebf1:MSTRG.4748.1	bta-miR-92a_R+2	RGD1307100:ENSRNOT00000075947
lncRNA	Ebf1:MSTRG.4748.3	bta-miR-92a_R+2	RGD1307100:ENSRNOT00000075947
lncRNA	Gli3:MSTRG.12666.3	bta-miR-92a_R+2	RGD1307100:ENSRNOT00000075947
lncRNA	Jmjd1c:MSTRG.17326.2	bta-miR-92a_R+2	RGD1307100:ENSRNOT00000075947
lncRNA	LOC689840:MSTRG.26880.1	bta-miR-92a_R+2	RGD1307100:ENSRNOT00000075947
lncRNA	Satb2:MSTRG.29208.2	bta-miR-92a_R+2	RGD1307100:ENSRNOT00000075947
lncRNA	Stt3b:MSTRG.28309.1	bta-miR-92a_R+2	RGD1307100:ENSRNOT00000075947
lncRNA	U1:MSTRG.24099.1	bta-miR-92a_R+2	RGD1307100:ENSRNOT00000075947
circRNA	ciRNA166	bta-miR-92a_R+2	RGD1307100:ENSRNOT00000075947
circRNA	ciRNA56	bta-miR-92a_R+2	RGD1307100:ENSRNOT00000075947
circRNA	circRNA1571	bta-miR-92a_R+2	RGD1307100:ENSRNOT00000075947
circRNA	circRNA1578	bta-miR-92a_R+2	RGD1307100:ENSRNOT00000075947
circRNA	circRNA4510	bta-miR-92a_R+2	RGD1307100:ENSRNOT00000075947
circRNA	circRNA4520	bta-miR-92a_R+2	RGD1307100:ENSRNOT00000075947
lncRNA	.:MSTRG.218.2	bta-miR-92a_R+2	Rgs3:ENSRNOT00000059183
lncRNA	.:MSTRG.28897.2	bta-miR-92a_R+2	Rgs3:ENSRNOT00000059183
lncRNA	.:MSTRG.29097.2	bta-miR-92a_R+2	Rgs3:ENSRNOT00000059183
lncRNA	.:MSTRG.3656.7	bta-miR-92a_R+2	Rgs3:ENSRNOT00000059183
lncRNA	.:MSTRG.9706.2	bta-miR-92a_R+2	Rgs3:ENSRNOT00000059183
lncRNA	AC127084:ENSRNOT00000076715	bta-miR-92a_R+2	Rgs3:ENSRNOT00000059183
lncRNA	AC134224:MSTRG.3657.1	bta-miR-92a_R+2	Rgs3:ENSRNOT00000059183
lncRNA	Col13a1:MSTRG.17444.1	bta-miR-92a_R+2	Rgs3:ENSRNOT00000059183
lncRNA	Ebf1:MSTRG.4748.1	bta-miR-92a_R+2	Rgs3:ENSRNOT00000059183
lncRNA	Ebf1:MSTRG.4748.3	bta-miR-92a_R+2	Rgs3:ENSRNOT00000059183
lncRNA	Gli3:MSTRG.12666.3	bta-miR-92a_R+2	Rgs3:ENSRNOT00000059183
lncRNA	Jmjd1c:MSTRG.17326.2	bta-miR-92a_R+2	Rgs3:ENSRNOT00000059183
lncRNA	LOC689840:MSTRG.26880.1	bta-miR-92a_R+2	Rgs3:ENSRNOT00000059183
lncRNA	Satb2:MSTRG.29208.2	bta-miR-92a_R+2	Rgs3:ENSRNOT00000059183
lncRNA	Stt3b:MSTRG.28309.1	bta-miR-92a_R+2	Rgs3:ENSRNOT00000059183
lncRNA	U1:MSTRG.24099.1	bta-miR-92a_R+2	Rgs3:ENSRNOT00000059183
circRNA	ciRNA166	bta-miR-92a_R+2	Rgs3:ENSRNOT00000059183
circRNA	ciRNA56	bta-miR-92a_R+2	Rgs3:ENSRNOT00000059183
circRNA	circRNA1571	bta-miR-92a_R+2	Rgs3:ENSRNOT00000059183
circRNA	circRNA1578	bta-miR-92a_R+2	Rgs3:ENSRNOT00000059183
circRNA	circRNA4510	bta-miR-92a_R+2	Rgs3:ENSRNOT00000059183
circRNA	circRNA4520	bta-miR-92a_R+2	Rgs3:ENSRNOT00000059183
lncRNA	.:MSTRG.218.2	bta-miR-92a_R+2	Tlr6:ENSRNOT00000002933
lncRNA	.:MSTRG.28897.2	bta-miR-92a_R+2	Tlr6:ENSRNOT00000002933
lncRNA	.:MSTRG.29097.2	bta-miR-92a_R+2	Tlr6:ENSRNOT00000002933
lncRNA	.:MSTRG.3656.7	bta-miR-92a_R+2	Tlr6:ENSRNOT00000002933
lncRNA	.:MSTRG.9706.2	bta-miR-92a_R+2	Tlr6:ENSRNOT00000002933
lncRNA	AC127084:ENSRNOT00000076715	bta-miR-92a_R+2	Tlr6:ENSRNOT00000002933
lncRNA	AC134224:MSTRG.3657.1	bta-miR-92a_R+2	Tlr6:ENSRNOT00000002933
lncRNA	Col13a1:MSTRG.17444.1	bta-miR-92a_R+2	Tlr6:ENSRNOT00000002933
lncRNA	Ebf1:MSTRG.4748.1	bta-miR-92a_R+2	Tlr6:ENSRNOT00000002933
lncRNA	Ebf1:MSTRG.4748.3	bta-miR-92a_R+2	Tlr6:ENSRNOT00000002933
lncRNA	Gli3:MSTRG.12666.3	bta-miR-92a_R+2	Tlr6:ENSRNOT00000002933
lncRNA	Jmjd1c:MSTRG.17326.2	bta-miR-92a_R+2	Tlr6:ENSRNOT00000002933
lncRNA	LOC689840:MSTRG.26880.1	bta-miR-92a_R+2	Tlr6:ENSRNOT00000002933
lncRNA	Satb2:MSTRG.29208.2	bta-miR-92a_R+2	Tlr6:ENSRNOT00000002933
lncRNA	Stt3b:MSTRG.28309.1	bta-miR-92a_R+2	Tlr6:ENSRNOT00000002933
lncRNA	U1:MSTRG.24099.1	bta-miR-92a_R+2	Tlr6:ENSRNOT00000002933
circRNA	ciRNA166	bta-miR-92a_R+2	Tlr6:ENSRNOT00000002933
circRNA	ciRNA56	bta-miR-92a_R+2	Tlr6:ENSRNOT00000002933
circRNA	circRNA1571	bta-miR-92a_R+2	Tlr6:ENSRNOT00000002933
circRNA	circRNA1578	bta-miR-92a_R+2	Tlr6:ENSRNOT00000002933
circRNA	circRNA4510	bta-miR-92a_R+2	Tlr6:ENSRNOT00000002933
circRNA	circRNA4520	bta-miR-92a_R+2	Tlr6:ENSRNOT00000002933
lncRNA	.:MSTRG.218.2	bta-miR-92a_R+2	Vps37c:ENSRNOT00000074079
lncRNA	.:MSTRG.28897.2	bta-miR-92a_R+2	Vps37c:ENSRNOT00000074079
lncRNA	.:MSTRG.29097.2	bta-miR-92a_R+2	Vps37c:ENSRNOT00000074079
lncRNA	.:MSTRG.3656.7	bta-miR-92a_R+2	Vps37c:ENSRNOT00000074079
lncRNA	.:MSTRG.9706.2	bta-miR-92a_R+2	Vps37c:ENSRNOT00000074079
lncRNA	AC127084:ENSRNOT00000076715	bta-miR-92a_R+2	Vps37c:ENSRNOT00000074079
lncRNA	AC134224:MSTRG.3657.1	bta-miR-92a_R+2	Vps37c:ENSRNOT00000074079
lncRNA	Col13a1:MSTRG.17444.1	bta-miR-92a_R+2	Vps37c:ENSRNOT00000074079
lncRNA	Ebf1:MSTRG.4748.1	bta-miR-92a_R+2	Vps37c:ENSRNOT00000074079
lncRNA	Ebf1:MSTRG.4748.3	bta-miR-92a_R+2	Vps37c:ENSRNOT00000074079
lncRNA	Gli3:MSTRG.12666.3	bta-miR-92a_R+2	Vps37c:ENSRNOT00000074079
lncRNA	Jmjd1c:MSTRG.17326.2	bta-miR-92a_R+2	Vps37c:ENSRNOT00000074079
lncRNA	LOC689840:MSTRG.26880.1	bta-miR-92a_R+2	Vps37c:ENSRNOT00000074079
lncRNA	Satb2:MSTRG.29208.2	bta-miR-92a_R+2	Vps37c:ENSRNOT00000074079
lncRNA	Stt3b:MSTRG.28309.1	bta-miR-92a_R+2	Vps37c:ENSRNOT00000074079
lncRNA	U1:MSTRG.24099.1	bta-miR-92a_R+2	Vps37c:ENSRNOT00000074079
circRNA	ciRNA166	bta-miR-92a_R+2	Vps37c:ENSRNOT00000074079
circRNA	ciRNA56	bta-miR-92a_R+2	Vps37c:ENSRNOT00000074079
circRNA	circRNA1571	bta-miR-92a_R+2	Vps37c:ENSRNOT00000074079
circRNA	circRNA1578	bta-miR-92a_R+2	Vps37c:ENSRNOT00000074079
circRNA	circRNA4510	bta-miR-92a_R+2	Vps37c:ENSRNOT00000074079
circRNA	circRNA4520	bta-miR-92a_R+2	Vps37c:ENSRNOT00000074079
lncRNA	.:MSTRG.23375.1	hsa-miR-4508_L+2	Cytl1:ENSRNOT00000035427
lncRNA	AABR07015057:MSTRG.9657.2	hsa-miR-4508_L+2	Cytl1:ENSRNOT00000035427
lncRNA	AABR07015078:MSTRG.9667.2	hsa-miR-4508_L+2	Cytl1:ENSRNOT00000035427
lncRNA	Ebf1:MSTRG.4748.3	hsa-miR-4508_L+2	Cytl1:ENSRNOT00000035427
lncRNA	Mark2:MSTRG.3719.1	hsa-miR-4508_L+2	Cytl1:ENSRNOT00000035427
lncRNA	Mir27a:MSTRG.14090.1	hsa-miR-4508_L+2	Cytl1:ENSRNOT00000035427
circRNA	circRNA1488	hsa-miR-4508_L+2	Cytl1:ENSRNOT00000035427
circRNA	circRNA4510	hsa-miR-4508_L+2	Cytl1:ENSRNOT00000035427
lncRNA	.:MSTRG.23375.1	hsa-miR-4508_L+2	Gba2:ENSRNOT00000066708
lncRNA	AABR07015057:MSTRG.9657.2	hsa-miR-4508_L+2	Gba2:ENSRNOT00000066708
lncRNA	AABR07015078:MSTRG.9667.2	hsa-miR-4508_L+2	Gba2:ENSRNOT00000066708
lncRNA	Ebf1:MSTRG.4748.3	hsa-miR-4508_L+2	Gba2:ENSRNOT00000066708
lncRNA	Mark2:MSTRG.3719.1	hsa-miR-4508_L+2	Gba2:ENSRNOT00000066708
lncRNA	Mir27a:MSTRG.14090.1	hsa-miR-4508_L+2	Gba2:ENSRNOT00000066708
circRNA	circRNA1488	hsa-miR-4508_L+2	Gba2:ENSRNOT00000066708
circRNA	circRNA4510	hsa-miR-4508_L+2	Gba2:ENSRNOT00000066708
lncRNA	.:MSTRG.23375.1	hsa-miR-4508_L+2	Mdfi:ENSRNOT00000020432
lncRNA	AABR07015057:MSTRG.9657.2	hsa-miR-4508_L+2	Mdfi:ENSRNOT00000020432
lncRNA	AABR07015078:MSTRG.9667.2	hsa-miR-4508_L+2	Mdfi:ENSRNOT00000020432
lncRNA	Ebf1:MSTRG.4748.3	hsa-miR-4508_L+2	Mdfi:ENSRNOT00000020432
lncRNA	Mark2:MSTRG.3719.1	hsa-miR-4508_L+2	Mdfi:ENSRNOT00000020432
lncRNA	Mir27a:MSTRG.14090.1	hsa-miR-4508_L+2	Mdfi:ENSRNOT00000020432
circRNA	circRNA1488	hsa-miR-4508_L+2	Mdfi:ENSRNOT00000020432
circRNA	circRNA4510	hsa-miR-4508_L+2	Mdfi:ENSRNOT00000020432
lncRNA	.:MSTRG.25540.1	hsa-mir-4454-p5_1ss19AT	Fam20b:ENSRNOT00000006018
lncRNA	.:MSTRG.3687.1	hsa-mir-4454-p5_1ss19AT	Fam20b:ENSRNOT00000006018
lncRNA	AABR07009428:MSTRG.15407.7	hsa-mir-4454-p5_1ss19AT	Fam20b:ENSRNOT00000006018
lncRNA	Tab2:MSTRG.1063.2	hsa-mir-4454-p5_1ss19AT	Fam20b:ENSRNOT00000006018
circRNA	ciRNA56	hsa-mir-4454-p5_1ss19AT	Fam20b:ENSRNOT00000006018
circRNA	circRNA1488	hsa-mir-4454-p5_1ss19AT	Fam20b:ENSRNOT00000006018
circRNA	circRNA1571	hsa-mir-4454-p5_1ss19AT	Fam20b:ENSRNOT00000006018
circRNA	circRNA4510	hsa-mir-4454-p5_1ss19AT	Fam20b:ENSRNOT00000006018
lncRNA	.:MSTRG.25540.1	hsa-mir-4454-p5_1ss19AT	Kif13a:ENSRNOT00000066447
lncRNA	.:MSTRG.3687.1	hsa-mir-4454-p5_1ss19AT	Kif13a:ENSRNOT00000066447
lncRNA	AABR07009428:MSTRG.15407.7	hsa-mir-4454-p5_1ss19AT	Kif13a:ENSRNOT00000066447
lncRNA	Tab2:MSTRG.1063.2	hsa-mir-4454-p5_1ss19AT	Kif13a:ENSRNOT00000066447
circRNA	ciRNA56	hsa-mir-4454-p5_1ss19AT	Kif13a:ENSRNOT00000066447
circRNA	circRNA1488	hsa-mir-4454-p5_1ss19AT	Kif13a:ENSRNOT00000066447
circRNA	circRNA1571	hsa-mir-4454-p5_1ss19AT	Kif13a:ENSRNOT00000066447
circRNA	circRNA4510	hsa-mir-4454-p5_1ss19AT	Kif13a:ENSRNOT00000066447
lncRNA	.:MSTRG.25540.1	hsa-mir-4454-p5_1ss19AT	Pi16:ENSRNOT00000000632
lncRNA	.:MSTRG.3687.1	hsa-mir-4454-p5_1ss19AT	Pi16:ENSRNOT00000000632
lncRNA	AABR07009428:MSTRG.15407.7	hsa-mir-4454-p5_1ss19AT	Pi16:ENSRNOT00000000632
lncRNA	Tab2:MSTRG.1063.2	hsa-mir-4454-p5_1ss19AT	Pi16:ENSRNOT00000000632
circRNA	ciRNA56	hsa-mir-4454-p5_1ss19AT	Pi16:ENSRNOT00000000632
circRNA	circRNA1488	hsa-mir-4454-p5_1ss19AT	Pi16:ENSRNOT00000000632
circRNA	circRNA1571	hsa-mir-4454-p5_1ss19AT	Pi16:ENSRNOT00000000632
circRNA	circRNA4510	hsa-mir-4454-p5_1ss19AT	Pi16:ENSRNOT00000000632
lncRNA	.:MSTRG.25540.1	hsa-mir-4454-p5_1ss19AT	Ripor1:ENSRNOT00000089022
lncRNA	.:MSTRG.3687.1	hsa-mir-4454-p5_1ss19AT	Ripor1:ENSRNOT00000089022
lncRNA	AABR07009428:MSTRG.15407.7	hsa-mir-4454-p5_1ss19AT	Ripor1:ENSRNOT00000089022
lncRNA	Tab2:MSTRG.1063.2	hsa-mir-4454-p5_1ss19AT	Ripor1:ENSRNOT00000089022
circRNA	ciRNA56	hsa-mir-4454-p5_1ss19AT	Ripor1:ENSRNOT00000089022
circRNA	circRNA1488	hsa-mir-4454-p5_1ss19AT	Ripor1:ENSRNOT00000089022
circRNA	circRNA1571	hsa-mir-4454-p5_1ss19AT	Ripor1:ENSRNOT00000089022
circRNA	circRNA4510	hsa-mir-4454-p5_1ss19AT	Ripor1:ENSRNOT00000089022
lncRNA	.:MSTRG.25540.1	hsa-mir-4454-p5_1ss19AT	Tead3:ENSRNOT00000000607
lncRNA	.:MSTRG.3687.1	hsa-mir-4454-p5_1ss19AT	Tead3:ENSRNOT00000000607
lncRNA	AABR07009428:MSTRG.15407.7	hsa-mir-4454-p5_1ss19AT	Tead3:ENSRNOT00000000607
lncRNA	Tab2:MSTRG.1063.2	hsa-mir-4454-p5_1ss19AT	Tead3:ENSRNOT00000000607
circRNA	ciRNA56	hsa-mir-4454-p5_1ss19AT	Tead3:ENSRNOT00000000607
circRNA	circRNA1488	hsa-mir-4454-p5_1ss19AT	Tead3:ENSRNOT00000000607
circRNA	circRNA1571	hsa-mir-4454-p5_1ss19AT	Tead3:ENSRNOT00000000607
circRNA	circRNA4510	hsa-mir-4454-p5_1ss19AT	Tead3:ENSRNOT00000000607
lncRNA	.:MSTRG.25540.1	hsa-mir-4454-p5_1ss19AT	Tmem237:ENSRNOT00000077483
lncRNA	.:MSTRG.3687.1	hsa-mir-4454-p5_1ss19AT	Tmem237:ENSRNOT00000077483
lncRNA	AABR07009428:MSTRG.15407.7	hsa-mir-4454-p5_1ss19AT	Tmem237:ENSRNOT00000077483
lncRNA	Tab2:MSTRG.1063.2	hsa-mir-4454-p5_1ss19AT	Tmem237:ENSRNOT00000077483
circRNA	ciRNA56	hsa-mir-4454-p5_1ss19AT	Tmem237:ENSRNOT00000077483
circRNA	circRNA1488	hsa-mir-4454-p5_1ss19AT	Tmem237:ENSRNOT00000077483
circRNA	circRNA1571	hsa-mir-4454-p5_1ss19AT	Tmem237:ENSRNOT00000077483
circRNA	circRNA4510	hsa-mir-4454-p5_1ss19AT	Tmem237:ENSRNOT00000077483
lncRNA	.:MSTRG.12659.1	mdo-miR-26-5p_R+3	Anks1a:ENSRNOT00000081604
lncRNA	.:MSTRG.218.2	mdo-miR-26-5p_R+3	Anks1a:ENSRNOT00000081604
lncRNA	.:MSTRG.23375.1	mdo-miR-26-5p_R+3	Anks1a:ENSRNOT00000081604
lncRNA	.:MSTRG.25540.1	mdo-miR-26-5p_R+3	Anks1a:ENSRNOT00000081604
lncRNA	.:MSTRG.26886.1	mdo-miR-26-5p_R+3	Anks1a:ENSRNOT00000081604
lncRNA	.:MSTRG.9706.2	mdo-miR-26-5p_R+3	Anks1a:ENSRNOT00000081604
lncRNA	AABR07009428:MSTRG.15407.7	mdo-miR-26-5p_R+3	Anks1a:ENSRNOT00000081604
lncRNA	AC099449:MSTRG.3498.27	mdo-miR-26-5p_R+3	Anks1a:ENSRNOT00000081604
lncRNA	AC099449:MSTRG.3498.63	mdo-miR-26-5p_R+3	Anks1a:ENSRNOT00000081604
lncRNA	AC099449:MSTRG.3498.71	mdo-miR-26-5p_R+3	Anks1a:ENSRNOT00000081604
lncRNA	AC099449:MSTRG.3498.92	mdo-miR-26-5p_R+3	Anks1a:ENSRNOT00000081604
lncRNA	AC134224:ENSRNOT00000093096	mdo-miR-26-5p_R+3	Anks1a:ENSRNOT00000081604
lncRNA	AC134224:MSTRG.3657.1	mdo-miR-26-5p_R+3	Anks1a:ENSRNOT00000081604
lncRNA	Cdv3:MSTRG.28073.1	mdo-miR-26-5p_R+3	Anks1a:ENSRNOT00000081604
lncRNA	Clint1:MSTRG.4783.3	mdo-miR-26-5p_R+3	Anks1a:ENSRNOT00000081604
lncRNA	Col13a1:MSTRG.17444.1	mdo-miR-26-5p_R+3	Anks1a:ENSRNOT00000081604
lncRNA	Ebf1:MSTRG.4748.1	mdo-miR-26-5p_R+3	Anks1a:ENSRNOT00000081604
lncRNA	Farp1:MSTRG.11148.1	mdo-miR-26-5p_R+3	Anks1a:ENSRNOT00000081604
lncRNA	Gli3:MSTRG.12666.3	mdo-miR-26-5p_R+3	Anks1a:ENSRNOT00000081604
lncRNA	Igf1r:MSTRG.2524.2	mdo-miR-26-5p_R+3	Anks1a:ENSRNOT00000081604
lncRNA	Jmjd1c:MSTRG.17326.2	mdo-miR-26-5p_R+3	Anks1a:ENSRNOT00000081604
lncRNA	Khdc4:MSTRG.16058.2	mdo-miR-26-5p_R+3	Anks1a:ENSRNOT00000081604
lncRNA	LOC689840:MSTRG.26880.1	mdo-miR-26-5p_R+3	Anks1a:ENSRNOT00000081604
lncRNA	Mark2:MSTRG.3719.1	mdo-miR-26-5p_R+3	Anks1a:ENSRNOT00000081604
lncRNA	Tab2:MSTRG.1063.2	mdo-miR-26-5p_R+3	Anks1a:ENSRNOT00000081604
lncRNA	Utrn:MSTRG.1107.2	mdo-miR-26-5p_R+3	Anks1a:ENSRNOT00000081604
circRNA	ciRNA166	mdo-miR-26-5p_R+3	Anks1a:ENSRNOT00000081604
circRNA	ciRNA56	mdo-miR-26-5p_R+3	Anks1a:ENSRNOT00000081604
circRNA	circRNA1488	mdo-miR-26-5p_R+3	Anks1a:ENSRNOT00000081604
circRNA	circRNA1571	mdo-miR-26-5p_R+3	Anks1a:ENSRNOT00000081604
circRNA	circRNA1578	mdo-miR-26-5p_R+3	Anks1a:ENSRNOT00000081604
circRNA	circRNA4490	mdo-miR-26-5p_R+3	Anks1a:ENSRNOT00000081604
circRNA	circRNA4510	mdo-miR-26-5p_R+3	Anks1a:ENSRNOT00000081604
circRNA	circRNA4520	mdo-miR-26-5p_R+3	Anks1a:ENSRNOT00000081604
circRNA	circRNA770	mdo-miR-26-5p_R+3	Anks1a:ENSRNOT00000081604
lncRNA	.:MSTRG.12659.1	mdo-miR-26-5p_R+3	Aspnl1:ENSRNOT00000020704
lncRNA	.:MSTRG.218.2	mdo-miR-26-5p_R+3	Aspnl1:ENSRNOT00000020704
lncRNA	.:MSTRG.23375.1	mdo-miR-26-5p_R+3	Aspnl1:ENSRNOT00000020704
lncRNA	.:MSTRG.25540.1	mdo-miR-26-5p_R+3	Aspnl1:ENSRNOT00000020704
lncRNA	.:MSTRG.26886.1	mdo-miR-26-5p_R+3	Aspnl1:ENSRNOT00000020704
lncRNA	.:MSTRG.9706.2	mdo-miR-26-5p_R+3	Aspnl1:ENSRNOT00000020704
lncRNA	AABR07009428:MSTRG.15407.7	mdo-miR-26-5p_R+3	Aspnl1:ENSRNOT00000020704
lncRNA	AC099449:MSTRG.3498.27	mdo-miR-26-5p_R+3	Aspnl1:ENSRNOT00000020704
lncRNA	AC099449:MSTRG.3498.63	mdo-miR-26-5p_R+3	Aspnl1:ENSRNOT00000020704
lncRNA	AC099449:MSTRG.3498.71	mdo-miR-26-5p_R+3	Aspnl1:ENSRNOT00000020704
lncRNA	AC099449:MSTRG.3498.92	mdo-miR-26-5p_R+3	Aspnl1:ENSRNOT00000020704
lncRNA	AC134224:ENSRNOT00000093096	mdo-miR-26-5p_R+3	Aspnl1:ENSRNOT00000020704
lncRNA	AC134224:MSTRG.3657.1	mdo-miR-26-5p_R+3	Aspnl1:ENSRNOT00000020704
lncRNA	Cdv3:MSTRG.28073.1	mdo-miR-26-5p_R+3	Aspnl1:ENSRNOT00000020704
lncRNA	Clint1:MSTRG.4783.3	mdo-miR-26-5p_R+3	Aspnl1:ENSRNOT00000020704
lncRNA	Col13a1:MSTRG.17444.1	mdo-miR-26-5p_R+3	Aspnl1:ENSRNOT00000020704
lncRNA	Ebf1:MSTRG.4748.1	mdo-miR-26-5p_R+3	Aspnl1:ENSRNOT00000020704
lncRNA	Farp1:MSTRG.11148.1	mdo-miR-26-5p_R+3	Aspnl1:ENSRNOT00000020704
lncRNA	Gli3:MSTRG.12666.3	mdo-miR-26-5p_R+3	Aspnl1:ENSRNOT00000020704
lncRNA	Igf1r:MSTRG.2524.2	mdo-miR-26-5p_R+3	Aspnl1:ENSRNOT00000020704
lncRNA	Jmjd1c:MSTRG.17326.2	mdo-miR-26-5p_R+3	Aspnl1:ENSRNOT00000020704
lncRNA	Khdc4:MSTRG.16058.2	mdo-miR-26-5p_R+3	Aspnl1:ENSRNOT00000020704
lncRNA	LOC689840:MSTRG.26880.1	mdo-miR-26-5p_R+3	Aspnl1:ENSRNOT00000020704
lncRNA	Mark2:MSTRG.3719.1	mdo-miR-26-5p_R+3	Aspnl1:ENSRNOT00000020704
lncRNA	Tab2:MSTRG.1063.2	mdo-miR-26-5p_R+3	Aspnl1:ENSRNOT00000020704
lncRNA	Utrn:MSTRG.1107.2	mdo-miR-26-5p_R+3	Aspnl1:ENSRNOT00000020704
circRNA	ciRNA166	mdo-miR-26-5p_R+3	Aspnl1:ENSRNOT00000020704
circRNA	ciRNA56	mdo-miR-26-5p_R+3	Aspnl1:ENSRNOT00000020704
circRNA	circRNA1488	mdo-miR-26-5p_R+3	Aspnl1:ENSRNOT00000020704
circRNA	circRNA1571	mdo-miR-26-5p_R+3	Aspnl1:ENSRNOT00000020704
circRNA	circRNA1578	mdo-miR-26-5p_R+3	Aspnl1:ENSRNOT00000020704
circRNA	circRNA4490	mdo-miR-26-5p_R+3	Aspnl1:ENSRNOT00000020704
circRNA	circRNA4510	mdo-miR-26-5p_R+3	Aspnl1:ENSRNOT00000020704
circRNA	circRNA4520	mdo-miR-26-5p_R+3	Aspnl1:ENSRNOT00000020704
circRNA	circRNA770	mdo-miR-26-5p_R+3	Aspnl1:ENSRNOT00000020704
lncRNA	.:MSTRG.12659.1	mdo-miR-26-5p_R+3	Atp6v1a:ENSRNOT00000093467
lncRNA	.:MSTRG.218.2	mdo-miR-26-5p_R+3	Atp6v1a:ENSRNOT00000093467
lncRNA	.:MSTRG.23375.1	mdo-miR-26-5p_R+3	Atp6v1a:ENSRNOT00000093467
lncRNA	.:MSTRG.25540.1	mdo-miR-26-5p_R+3	Atp6v1a:ENSRNOT00000093467
lncRNA	.:MSTRG.26886.1	mdo-miR-26-5p_R+3	Atp6v1a:ENSRNOT00000093467
lncRNA	.:MSTRG.9706.2	mdo-miR-26-5p_R+3	Atp6v1a:ENSRNOT00000093467
lncRNA	AABR07009428:MSTRG.15407.7	mdo-miR-26-5p_R+3	Atp6v1a:ENSRNOT00000093467
lncRNA	AC099449:MSTRG.3498.27	mdo-miR-26-5p_R+3	Atp6v1a:ENSRNOT00000093467
lncRNA	AC099449:MSTRG.3498.63	mdo-miR-26-5p_R+3	Atp6v1a:ENSRNOT00000093467
lncRNA	AC099449:MSTRG.3498.71	mdo-miR-26-5p_R+3	Atp6v1a:ENSRNOT00000093467
lncRNA	AC099449:MSTRG.3498.92	mdo-miR-26-5p_R+3	Atp6v1a:ENSRNOT00000093467
lncRNA	AC134224:ENSRNOT00000093096	mdo-miR-26-5p_R+3	Atp6v1a:ENSRNOT00000093467
lncRNA	AC134224:MSTRG.3657.1	mdo-miR-26-5p_R+3	Atp6v1a:ENSRNOT00000093467
lncRNA	Cdv3:MSTRG.28073.1	mdo-miR-26-5p_R+3	Atp6v1a:ENSRNOT00000093467
lncRNA	Clint1:MSTRG.4783.3	mdo-miR-26-5p_R+3	Atp6v1a:ENSRNOT00000093467
lncRNA	Col13a1:MSTRG.17444.1	mdo-miR-26-5p_R+3	Atp6v1a:ENSRNOT00000093467
[truncated: 21,949 more rows]
