# Supplementary material for: Whole-transcriptome sequencing and ceRNA interaction network of temporomandibular joint osteoarthritis
Source: Front Genet. 2022 Oct 5;13:962574. doi: 10.3389/fgene.2022.962574 (PMC9581126; doi:10.3389/fgene.2022.962574)
Supplement: Supplementary file 5 [file Table4.XLSX]

## Sheet: Sheet1
GO_ID	GO_Term	GO_function	GO_class	Genes	S gene number	TS gene number	B gene number	TB gene number	pvalue
GO:0003777	microtubule motor activity	molecular_function	10	Dync1h1;Dync1li2;Kif13a;Kif16b;Kif1c;Kif5a;Klc2	7	179	63	14759	1.07131e-05
GO:0007018	microtubule-based movement	biological_process	5	Dync1h1;Dync1i2;Dync1li2;Kif13a;Kif16b;Kif1c;Kif5a	7	179	71	14759	2.37359e-05
GO:0003774	motor activity	molecular_function	9	Dync1h1;Dync1i2;Dync1li2;Kif13a;Kif16b;Kif1c;Kif5a;Myh9l1	8	179	109	14759	5.36309e-05
GO:0018401	peptidyl-proline hydroxylation to 4-hydroxy-L-proline	biological_process	7	Egln2;P4ha2	3	179	9	14759	0.000139656
GO:0005916	fascia adherens	cellular_component	6	Actn1;Cdh2;Sptan1	3	179	13	14759	0.000458778
GO:0097363	protein O-GlcNAc transferase activity	molecular_function	7	Ogt;Pomgnt2	2	179	4	14759	0.000863714
GO:0004656	procollagen-proline 4-dioxygenase activity	molecular_function	9	P4ha2	2	179	4	14759	0.000863714
GO:0016222	procollagen-proline 4-dioxygenase complex	cellular_component	7	P4ha2	2	179	4	14759	0.000863714
GO:0005874	microtubule	cellular_component	7	Camsap2;Dnm1l;Dync1h1;Dync1i2;Dync1li2;Kif13a;Kif16b;Klc2;Map2;Ror2;Stim1	11	179	297	14759	0.00101335
GO:0031418	L-ascorbic acid binding	molecular_function	6	Egln2;P4ha2	3	179	17	14759	0.00105253
GO:0035253	ciliary rootlet	cellular_component	6	Kif5a;Klc2;Rab28	3	179	18	14759	0.00125183
GO:0005515	protein binding	molecular_function	4	Actn1;Adipoq;Anks1a;Arfgap1;Arhgef7;Aspnl1;Bid;Brd4;Btbd10;Camsap2;Cask;Coro6;Cttn;Cyp1a1;Dag1;Dcaf8;Ddi2;Dnm1l;Dync1i2;Eif4ebp3;Enah;Epc1;Epha5;Fbxl3;Fgfr1op;Flii;Hnrnpu;Hps5;Irak3;Itgb4;Kif13a;Kif16b;Kif1c;Klc2;Klhl25;Mast3;Mef2c;Mpp5;Myh9l1;Nedd4;Nlrp1a;Ogt;P4ha2;Pea15;Pml;Pomgnt2;Prelp;Ptprc;Rgs3;Ror2;Sema4c;Sf3b3;Slc22a5;Slco2b1;Spag9;Sptan1;Stim1;Tep1;Tlr6;Ubap2l;Uhrf2;Usp24;Wnk1;Zbtb49	65	179	3824	14759	0.0012848
GO:0071987	WD40-repeat domain binding	molecular_function	6	Usp47	2	179	5	14759	0.00142803
GO:1902230	negative regulation of intrinsic apoptotic signaling pathway in response to DNA damage	biological_process	9	Bid;Usp47	3	179	19	14759	0.00147336
GO:0030027	lamellipodium	cellular_component	6	AABR07007032;Actn1;Arhgef7;Cdh2;Cttn;Dag1;Enah;Phactr4	8	179	181	14759	0.00165031
GO:0099122	RNA polymerase II C-terminal domain binding	molecular_function	8	Brd4;Hnrnpu	2	179	6	14759	0.00212497
GO:0030220	platelet formation	biological_process	7	Actn1;Mef2c;Zfp385a	3	179	23	14759	0.00259865
GO:0030507	spectrin binding	molecular_function	6	Camsap2;Ptprc;Sptan1	3	179	23	14759	0.00259865
GO:0000228	nuclear chromosome	cellular_component	7	Blm;Hnrnpu;Top2a	3	179	24	14759	0.00294361
GO:0005868	cytoplasmic dynein complex	cellular_component	6	Dync1h1;Dync1i2;Dync1li2	3	179	24	14759	0.00294361
GO:0042406	extrinsic component of endoplasmic reticulum membrane	cellular_component	6	Gba2;Pml	2	179	7	14759	0.00295126
GO:0005829	cytosol	cellular_component	6	Abcf1;Actn1;Anks1a;Apold1;Arhgef7;Atp6v1a;Bid;Blm;Cables1;Calb2;Camsap2;Cand2;Cltb;Cops7a;Dcaf8;Dennd1a;Dnajb4;Dnm1l;Eif3j;Enah;Fbxl3;Flii;Gba2;Hap1;Hps5;Kif16b;Klc2;Marchf2;Nedd4;Nlrp1a;Noc2l;Nrf1;Ogt;P4ha2;Parp9;Pea15;Pml;Serinc5;Shq1;Slc22a5;Spag9;Sptan1;Steap2;Tbc1d14;Tbc1d5;Ube2o;Urgcp;Usp24;Usp47;Wnk1;Ylpm1;Zbtb49	54	179	3142	14759	0.00318154
GO:0051015	actin filament binding	molecular_function	7	AABR07007032;Actn1;Coro6;Cttn;Fhod3;Flii;Myh9l1;Rcsd1	8	179	208	14759	0.00389329
GO:1905394	retromer complex binding	molecular_function	5	Igf2r;Tbc1d5	2	179	8	14759	0.00390371
GO:0030118	clathrin coat	cellular_component	7	Cltb;Igf2r	2	179	8	14759	0.00390371
GO:0035520	monoubiquitinated protein deubiquitination	biological_process	10	Usp47	2	179	8	14759	0.00390371
GO:0005524	ATP binding	molecular_function	5	Abcf1;Abcf2;Atp13a2;Atp6v1a;Blm;Cask;Dhx15;Dync1h1;Dync1li2;Dyrk1b;Epha5;Fgfr3;Hnrnpu;Irak3;Kif13a;Kif16b;Kif1c;Kif5a;Mast3;Mpp5;Myh9l1;Nlrp1a;Pdk3;Ror2;Rps6ka5;Slc22a5;Smarca5;Top2a;Wnk1	29	179	1438	14759	0.00430912
GO:1904753	negative regulation of vascular associated smooth muscle cell migration	biological_process	10	Adipoq;Mef2c	2	179	9	14759	0.00497915
GO:0016363	nuclear matrix	cellular_component	6	Blm;Dnmt3a;Hnrnpu;Pml;Tep1	5	179	91	14759	0.00498048
GO:0030286	dynein complex	cellular_component	5	Dync1h1;Dync1i2;Dync1li2	3	179	30	14759	0.00559877
GO:2000987	positive regulation of behavioral fear response	biological_process	9	Mef2c;Penk	2	179	10	14759	0.0061745
GO:0009437	carnitine metabolic process	biological_process	7	Crot;Slc22a5	2	179	10	14759	0.0061745
GO:0044853	plasma membrane raft	cellular_component	7	Cdh2;Dag1;Stim1	3	179	33	14759	0.00732689
GO:0004842	ubiquitin-protein transferase activity	molecular_function	6	Birc2;Cul1;Fbxl3;Marchf2;Nedd4;Pml;Ube2o;Uhrf2	8	179	232	14759	0.00741718
GO:0010972	negative regulation of G2/M transition of mitotic cell cycle	biological_process	10	Usp47	2	179	11	14759	0.00748673
GO:0010766	negative regulation of sodium ion transport	biological_process	10	Nedd4;Wnk1	2	179	11	14759	0.00748673
GO:0072711	cellular response to hydroxyurea	biological_process	7	Blm;Ddi2	2	179	11	14759	0.00748673
GO:1903146	regulation of autophagy of mitochondrion	biological_process	9	Cttn;Dnm1l	2	179	11	14759	0.00748673
GO:0071864	positive regulation of cell proliferation in bone marrow	biological_process	8	Fgfr3;Mef2c	2	179	11	14759	0.00748673
GO:0006513	protein monoubiquitination	biological_process	12	Cul1;Nedd4;Ube2o	3	179	34	14759	0.00796528
GO:1903508	positive regulation of nucleic acid-templated transcription	biological_process	10	Actn1;Birc2;Mycbp;Ncoa4	4	179	65	14759	0.00797094
GO:2001238	positive regulation of extrinsic apoptotic signaling pathway	biological_process	10	Bid;Pml;Ptprc	3	179	35	14759	0.00863547
GO:0005776	autophagosome	cellular_component	7	Atp13a2;Hap1;Tbc1d14;Tbc1d5	4	179	67	14759	0.00885738
GO:0002011	morphogenesis of an epithelial sheet	biological_process	7	Dag1;Mpp5	2	179	12	14759	0.00891287
GO:0101005	ubiquitinyl hydrolase activity	molecular_function	5	Usp47	2	179	12	14759	0.00891287
GO:0032437	cuticular plate	cellular_component	6	Calb2;Sptan1	2	179	12	14759	0.00891287
GO:0016887	ATPase activity	molecular_function	9	Abcf1;Abcf2;Atp13a2;Blm;Kif13a;Kif16b;Smarca5	7	179	196	14759	0.0100065
GO:0016818	hydrolase activity, acting on acid anhydrides, in phosphorus-containing anhydrides	molecular_function	6	Blm;Smarca5	2	179	13	14759	0.01045
GO:0003376	sphingosine-1-phosphate receptor signaling pathway	biological_process	6	S1pr3;Spns2	2	179	13	14759	0.01045
GO:0019005	SCF ubiquitin ligase complex	cellular_component	7	Cul1;Fbxl3;Usp47	4	179	71	14759	0.010818
GO:0090263	positive regulation of canonical Wnt signaling pathway	biological_process	10	Fgfr3;Ror2;Usp47;Wnk1	5	179	110	14759	0.0109153
GO:0000166	nucleotide binding	molecular_function	5	Abcf1;Abcf2;Atp13a2;Atp6v1a;Blm;Dhx15;Dnm1l;Dync1h1;Dync1li2;Dyrk1b;Epha5;Fgfr3;Hnrnpu;Kif13a;Kif16b;Kif1c;Kif5a;Mast3;Mpp5;Mx2;Myh9l1;Pdk3;Rab28;Ror2;Rps6ka5;Slc22a5;Smarca5;Top2a;Wnk1	29	179	1541	14759	0.0110093
GO:0034115	negative regulation of heterotypic cell-cell adhesion	biological_process	8	Adipoq;Wnk1	2	179	14	14759	0.0120952
GO:0002755	MyD88-dependent toll-like receptor signaling pathway	biological_process	9	Irak3;Tlr6	2	179	14	14759	0.0120952
GO:0005522	profilin binding	molecular_function	5	Cttn;Enah	2	179	14	14759	0.0120952
GO:0016183	synaptic vesicle coating	biological_process	8	Cltb	1	179	1	14759	0.0121282
GO:0021682	nerve maturation	biological_process	6	Dag1	1	179	1	14759	0.0121282
GO:0016340	calcium-dependent cell-matrix adhesion	biological_process	7	Dag1	1	179	1	14759	0.0121282
GO:0045343	regulation of MHC class I biosynthetic process	biological_process	8	Pml	1	179	1	14759	0.0121282
GO:0005010	insulin-like growth factor-activated receptor activity	molecular_function	10	Igf2r	1	179	1	14759	0.0121282
GO:0016711	flavonoid 3'-monooxygenase activity	molecular_function	7	Cyp1a1	1	179	1	14759	0.0121282
GO:0051293	establishment of spindle localization	biological_process	8	Dync1h1	1	179	1	14759	0.0121282
GO:0031071	cysteine desulfurase activity	molecular_function	7	Nfs1	1	179	1	14759	0.0121282
GO:0019826	oxygen sensor activity	molecular_function	6	Egln2	1	179	1	14759	0.0121282
GO:0002920	regulation of humoral immune response	biological_process	7	Spns2	1	179	1	14759	0.0121282
GO:0043244	regulation of protein-containing complex disassembly	biological_process	7	Irak3	1	179	1	14759	0.0121282
GO:0090329	regulation of DNA-dependent DNA replication	biological_process	10	Blm	1	179	1	14759	0.0121282
GO:0019341	dibenzo-p-dioxin catabolic process	biological_process	7	Cyp1a1	1	179	1	14759	0.0121282
GO:0016203	muscle attachment	biological_process	4	Dag1	1	179	1	14759	0.0121282
GO:0030691	Noc2p-Noc3p complex	cellular_component	5	Noc2l	1	179	1	14759	0.0121282
GO:0060330	regulation of response to interferon-gamma	biological_process	8	Parp9	1	179	1	14759	0.0121282
GO:1902524	positive regulation of protein K48-linked ubiquitination	biological_process	13	Birc2	1	179	1	14759	0.0121282
GO:0072570	ADP-D-ribose binding	molecular_function	6	Parp9	1	179	1	14759	0.0121282
GO:1904784	NLRP1 inflammasome complex assembly	biological_process	7	Nlrp1a	1	179	1	14759	0.0121282
GO:0048073	regulation of eye pigmentation	biological_process	6	Spns2	1	179	1	14759	0.0121282
GO:0010522	regulation of calcium ion transport into cytosol	biological_process	6	Pml	1	179	1	14759	0.0121282
GO:0032938	negative regulation of translation in response to oxidative stress	biological_process	12	Pml	1	179	1	14759	0.0121282
GO:0010933	positive regulation of macrophage tolerance induction	biological_process	8	Irak3	1	179	1	14759	0.0121282
GO:0046624	sphingolipid transporter activity	molecular_function	5	Spns2	1	179	1	14759	0.0121282
GO:0008094	DNA-dependent ATPase activity	molecular_function	11	Blm;Smarca5;Top2a	3	179	40	14759	0.0124739
GO:0016757	transferase activity, transferring glycosyl groups	molecular_function	5	Gba2;Gxylt1;Ogt;Parp9;Pigc;Pomgnt2;St6gal1	7	179	205	14759	0.0125853
GO:0003725	double-stranded RNA binding	molecular_function	7	Actn1;Dhx15;Hnrnpu;Ilf3	4	179	75	14759	0.0130391
GO:0042177	negative regulation of protein catabolic process	biological_process	8	Azin1;Irak3;Sf3b3	3	179	41	14759	0.0133408
GO:0002162	dystroglycan binding	molecular_function	5	Dag1;Map2	2	179	15	14759	0.0138457
GO:0046641	positive regulation of alpha-beta T cell proliferation	biological_process	12	Blm;Ptprc	2	179	15	14759	0.0138457
GO:0031113	regulation of microtubule polymerization	biological_process	9	Camsap2;Gba2	2	179	15	14759	0.0138457
GO:0097284	hepatocyte apoptotic process	biological_process	8	Bid;Dnmt3a	2	179	15	14759	0.0138457
GO:0005581	collagen trimer	cellular_component	4	Adipoq;P4ha2	3	179	42	14759	0.0142413
GO:0002039	p53 binding	molecular_function	5	Blm;Brd4;Tep1;Zfp385a	4	179	77	14759	0.0142508
GO:0005654	nucleoplasm	cellular_component	6	Abcf1;Anks1a;Apold1;Blm;Btbd10;Cops7a;Dag1;Dcaf8;Dennd1a;Dnajb4;Dnmt3a;Dyrk1b;Egln2;Epc1;Fam20b;Flii;Golga4;Grsf1;Gtf2i;Hnrnpu;Ilf3;Klc2;Luc7l3;Med13;Mef2c;Noc2l;Nrf1;Ogt;P4ha2;Parp9;Pea15;Pml;Rps6ka5;Sf3b3;Shq1;Tbc1d14;Top2a;Ube2o;Uhrf2;Ylpm1;Zbtb49;Zfp382	43	179	2567	14759	0.0145337
GO:0030017	sarcomere	cellular_component	5	Actn1;Fhod3;Mef2c	3	179	43	14759	0.0151755
GO:1990023	mitotic spindle midzone	cellular_component	7	Cttn;Hnrnpu	2	179	16	14759	0.0156987
GO:0031953	negative regulation of protein autophosphorylation	biological_process	11	Adipoq;Ptprc	2	179	16	14759	0.0156987
GO:0043410	positive regulation of MAPK cascade	biological_process	11	Cdh2;Fgfr3;Ptprc;Ror2;Spag9	5	179	123	14759	0.0170121
GO:0005871	kinesin complex	cellular_component	5	Kif13a;Kif16b;Klc2	3	179	45	14759	0.0171456
GO:0051639	actin filament network formation	biological_process	7	Actn1;Fhod3	2	179	17	14759	0.0176515
GO:0017166	vinculin binding	molecular_function	6	Actn1;Dag1	2	179	17	14759	0.0176515
GO:0007041	lysosomal transport	biological_process	7	Atp13a2;Igf2r	2	179	17	14759	0.0176515
GO:0007520	myoblast fusion	biological_process	6	Dyrk1b;Myof	2	179	17	14759	0.0176515
GO:0070266	necroptotic process	biological_process	7	Birc2;Dnm1l	2	179	17	14759	0.0176515
GO:0016702	oxidoreductase activity, acting on single donors with incorporation of molecular oxygen, incorporation of two atoms of oxygen	molecular_function	6	P4ha2	2	179	17	14759	0.0176515
GO:0051259	protein complex oligomerization	biological_process	7	Blm;Dnm1l	2	179	17	14759	0.0176515
GO:0034453	microtubule anchoring	biological_process	8	Dag1;Fgfr1op	2	179	17	14759	0.0176515
GO:0005085	guanyl-nucleotide exchange factor activity	molecular_function	7	Arhgef7;Dennd1a;Dennd2c;Dock7;Dock9;Ralgds	6	179	171	14759	0.0180043
GO:0019894	kinesin binding	molecular_function	6	Kif5a;Klc2;Spag9	3	179	46	14759	0.0181817
GO:0030282	bone mineralization	biological_process	7	Aspnl1;Fgfr3;Ror2	3	179	47	14759	0.0192519
GO:0061099	negative regulation of protein tyrosine kinase activity	biological_process	12	Fgfr1op;Ptprc	2	179	18	14759	0.0197015
GO:0043046	DNA methylation involved in gamete generation	biological_process	11	Dnmt3a;Tdrkh	2	179	18	14759	0.0197015
GO:0099524	postsynaptic cytosol	cellular_component	4	Dag1;Nedd4	2	179	18	14759	0.0197015
GO:0051457	maintenance of protein location in nucleus	biological_process	8	Hnrnpu;Pml	2	179	18	14759	0.0197015
GO:0003713	transcription coactivator activity	molecular_function	5	Bicral;Birc2;Dyrk1b;Med13;Mycbp;Ncoa4;Pml	7	179	225	14759	0.0199755
GO:0001666	response to hypoxia	biological_process	5	Adipoq;Apold1;Birc2;Cyp1a1;Egln2;Penk;Pml	7	179	226	14759	0.0204104
GO:0010008	endosome membrane	cellular_component	8	Igf2r;Kif13a;Marchf2;Steap2;Tbc1d5;Vps37c	6	179	176	14759	0.0204344
GO:0003779	actin binding	molecular_function	6	AABR07007032;Actn1;Dag1;Enah;Flii;Hnrnpu;Myh9l1;Phactr4;Sptan1	9	179	333	14759	0.0204441
GO:0016705	oxidoreductase activity, acting on paired donors, with incorporation or reduction of molecular oxygen	molecular_function	5	Cyp1a1;Egln2;P4ha2	4	179	87	14759	0.0213686
GO:0070034	telomerase RNA binding	molecular_function	7	Hnrnpu;Tep1	2	179	19	14759	0.021846
GO:0070498	interleukin-1-mediated signaling pathway	biological_process	7	Irak3;Rps6ka5	2	179	19	14759	0.021846
GO:0030140	trans-Golgi network transport vesicle	cellular_component	8	Igf2r;Steap2	2	179	19	14759	0.021846
GO:1990869	cellular response to chemokine	biological_process	8	Ripor1;Wnk1	2	179	19	14759	0.021846
GO:2000648	positive regulation of stem cell proliferation	biological_process	8	Hnrnpu;Ptprc	2	179	19	14759	0.021846
GO:0002244	hematopoietic progenitor cell differentiation	biological_process	6	Arhgef7;Dock7;Ptprc;Top2a	4	179	90	14759	0.0238603
GO:0006879	cellular iron ion homeostasis	biological_process	12	Atp13a2;Atp6v1a;Ncoa4	3	179	51	14759	0.0238751
GO:0010821	regulation of mitochondrion organization	biological_process	8	Atp13a2;Dnm1l	2	179	20	14759	0.0240824
GO:0006893	Golgi to plasma membrane transport	biological_process	9	Exoc2;Steap2	2	179	20	14759	0.0240824
GO:0021954	central nervous system neuron development	biological_process	7	Gba2;Map2	2	179	20	14759	0.0240824
GO:0015986	ATP synthesis coupled proton transport	biological_process	13	Atp5mc2;Atp6v1a	2	179	20	14759	0.0240824
GO:0034063	stress granule assembly	biological_process	9	Dync1h1;Ubap2l	2	179	20	14759	0.0240824
GO:0033673	negative regulation of kinase activity	biological_process	11	Hnrnpu;Wnk1	2	179	20	14759	0.0240824
GO:0001741	XY body	cellular_component	8	Birc2;Dnmt3a	2	179	20	14759	0.0240824
GO:2001107	negative regulation of Rho guanyl-nucleotide exchange factor activity	biological_process	9	Ripor1	1	179	2	14759	0.0241101
GO:0099534	calcium ion binding involved in regulation of presynaptic cytosolic calcium ion concentration	molecular_function	9	Calb2	1	179	2	14759	0.0241101
GO:1905517	macrophage migration	biological_process	6	Ror2	1	179	2	14759	0.0241101
GO:0030690	Noc1p-Noc2p complex	cellular_component	5	Noc2l	1	179	2	14759	0.0241101
GO:0045870	positive regulation of single stranded viral RNA replication via double stranded DNA intermediate	biological_process	11	Top2a	1	179	2	14759	0.0241101
GO:0099140	presynaptic actin cytoskeleton organization	biological_process	8	Arhgef7	1	179	2	14759	0.0241101
GO:0050295	steryl-beta-glucosidase activity	molecular_function	9	Gba2	1	179	2	14759	0.0241101
GO:1901187	regulation of ephrin receptor signaling pathway	biological_process	8	Anks1a	1	179	2	14759	0.0241101
GO:0003918	DNA topoisomerase type II (double strand cut, ATP-hydrolyzing) activity	molecular_function	12	Top2a	1	179	2	14759	0.0241101
GO:0048640	negative regulation of developmental growth	biological_process	7	Fgfr3	1	179	2	14759	0.0241101
GO:0031545	peptidyl-proline 4-dioxygenase activity	molecular_function	8	Egln2	1	179	2	14759	0.0241101
GO:0031213	RSF complex	cellular_component	9	Smarca5	1	179	2	14759	0.0241101
GO:1903710	spermine transmembrane transport	biological_process	10	Atp13a2	1	179	2	14759	0.0241101
GO:0033386	geranylgeranyl diphosphate biosynthetic process	biological_process	9	Ggps1	1	179	2	14759	0.0241101
GO:0098942	retrograde trans-synaptic signaling by trans-synaptic protein complex	biological_process	9	Dag1	1	179	2	14759	0.0241101
GO:0098577	inactive sex chromosome	cellular_component	8	Hnrnpu	1	179	2	14759	0.0241101
GO:0017130	poly(C) RNA binding	molecular_function	9	Hnrnpu	1	179	2	14759	0.0241101
GO:0017122	protein N-acetylglucosaminyltransferase complex	cellular_component	5	Ogt	1	179	2	14759	0.0241101
GO:0099013	neuronal dense core vesicle lumen	cellular_component	5	Penk	1	179	2	14759	0.0241101
GO:0140037	sumo-dependent protein binding	molecular_function	7	Pml	1	179	2	14759	0.0241101
GO:0071718	sodium-independent icosanoid transport	biological_process	11	Slco2b1	1	179	2	14759	0.0241101
GO:0008823	cupric reductase activity	molecular_function	7	Steap2	1	179	2	14759	0.0241101
GO:0005006	epidermal growth factor-activated receptor activity	molecular_function	10	Efemp1	1	179	2	14759	0.0241101
GO:0035750	protein localization to myelin sheath abaxonal region	biological_process	7	Mpp5	1	179	2	14759	0.0241101
GO:0061386	closure of optic fissure	biological_process	8	Phactr4	1	179	2	14759	0.0241101
GO:0009330	DNA topoisomerase type II (double strand cut, ATP-hydrolyzing) complex	cellular_component	4	Top2a	1	179	2	14759	0.0241101
GO:1905273	positive regulation of proton-transporting ATP synthase activity, rotational mechanism	biological_process	8	Atpsckmt	1	179	2	14759	0.0241101
GO:0017143	insecticide metabolic process	biological_process	6	Cyp1a1	1	179	2	14759	0.0241101
GO:0072558	NLRP1 inflammasome complex	cellular_component	5	Nlrp1a	1	179	2	14759	0.0241101
GO:0019035	viral integration complex	cellular_component	4	Top2a	1	179	2	14759	0.0241101
GO:0045715	negative regulation of low-density lipoprotein particle receptor biosynthetic process	biological_process	10	Adipoq	1	179	2	14759	0.0241101
GO:0090317	negative regulation of intracellular protein transport	biological_process	9	Adipoq	1	179	2	14759	0.0241101
GO:0004337	geranyltranstransferase activity	molecular_function	7	Ggps1	1	179	2	14759	0.0241101
GO:1990280	RNA localization to chromatin	biological_process	6	Hnrnpu	1	179	2	14759	0.0241101
GO:0043990	histone H2A-S1 phosphorylation	biological_process	12	Rps6ka5	1	179	2	14759	0.0241101
GO:2000590	negative regulation of metanephric mesenchymal cell migration	biological_process	9	Adipoq	1	179	2	14759	0.0241101
GO:0031543	peptidyl-proline dioxygenase activity	molecular_function	7	Egln2	1	179	2	14759	0.0241101
GO:2000152	regulation of ubiquitin-specific protease activity	biological_process	10	Atp13a2	1	179	2	14759	0.0241101
GO:0016679	oxidoreductase activity, acting on diphenols and related substances as donors	molecular_function	5	Cyp1a1	1	179	2	14759	0.0241101
GO:0070576	vitamin D 24-hydroxylase activity	molecular_function	5	Cyp1a1	1	179	2	14759	0.0241101
GO:0045950	negative regulation of mitotic recombination	biological_process	11	Blm	1	179	2	14759	0.0241101
GO:1905463	negative regulation of DNA duplex unwinding	biological_process	10	Top2a	1	179	2	14759	0.0241101
GO:0070994	detection of oxidative stress	biological_process	6	Adipoq	1	179	2	14759	0.0241101
GO:2000534	positive regulation of renal albumin absorption	biological_process	7	Adipoq	1	179	2	14759	0.0241101
GO:1902889	protein localization to spindle microtubule	biological_process	11	Hnrnpu	1	179	2	14759	0.0241101
GO:0097734	extracellular exosome biogenesis	biological_process	6	Atp13a2	1	179	2	14759	0.0241101
GO:2000478	positive regulation of metanephric glomerular visceral epithelial cell development	biological_process	9	Adipoq	1	179	2	14759	0.0241101
GO:0004161	dimethylallyltranstransferase activity	molecular_function	7	Ggps1	1	179	2	14759	0.0241101
GO:1902178	fibroblast growth factor receptor apoptotic signaling pathway	biological_process	9	Fgfr3	1	179	2	14759	0.0241101
GO:0004142	diacylglycerol cholinephosphotransferase activity	molecular_function	8	Chpt1	1	179	2	14759	0.0241101
GO:0035459	vesicle cargo loading	biological_process	6	Kif13a	1	179	2	14759	0.0241101
GO:0033034	positive regulation of myeloid cell apoptotic process	biological_process	10	Adipoq	1	179	2	14759	0.0241101
GO:0033384	geranyl diphosphate biosynthetic process	biological_process	9	Ggps1	1	179	2	14759	0.0241101
GO:0098706	iron ion import across cell outer membrane	biological_process	12	Steap2	1	179	2	14759	0.0241101
GO:0098770	FBXO family protein binding	molecular_function	5	Birc2	1	179	2	14759	0.0241101
GO:0051433	BH2 domain binding	molecular_function	7	Dnm1l	1	179	2	14759	0.0241101
GO:0061749	forked DNA-dependent helicase activity	molecular_function	11	Blm	1	179	2	14759	0.0241101
GO:1902047	polyamine transmembrane transport	biological_process	8	Atp13a2	1	179	2	14759	0.0241101
GO:0052851	ferric-chelate reductase (NADPH) activity	molecular_function	7	Steap2	1	179	2	14759	0.0241101
GO:0070543	response to linoleic acid	biological_process	7	Adipoq	1	179	2	14759	0.0241101
GO:1903141	negative regulation of establishment of endothelial barrier	biological_process	10	S1pr3	1	179	2	14759	0.0241101
GO:0031010	ISWI-type complex	cellular_component	8	Smarca5	1	179	2	14759	0.0241101
GO:0045337	farnesyl diphosphate biosynthetic process	biological_process	9	Ggps1	1	179	2	14759	0.0241101
GO:1902164	positive regulation of DNA damage response, signal transduction by p53 class mediator resulting in transcription of p21 class mediator	biological_process	12	Zfp385a	1	179	2	14759	0.0241101
GO:2000233	negative regulation of rRNA processing	biological_process	9	Shq1	1	179	2	14759	0.0241101
GO:0021535	cell migration in hindbrain	biological_process	7	Sema4c	1	179	2	14759	0.0241101
GO:1990938	peptidyl-aspartic acid autophosphorylation	biological_process	11	Atp13a2	1	179	2	14759	0.0241101
GO:0034150	toll-like receptor 6 signaling pathway	biological_process	9	Tlr6	1	179	2	14759	0.0241101
GO:1905706	regulation of mitochondrial ATP synthesis coupled proton transport	biological_process	11	Atpsckmt	1	179	2	14759	0.0241101
GO:0035663	Toll-like receptor 2 binding	molecular_function	7	Tlr6	1	179	2	14759	0.0241101
GO:0005925	focal adhesion	cellular_component	7	Actn1;Arhgef7;Cttn;Dag1;Enah;Ptprc	6	179	183	14759	0.0241978
GO:0034644	cellular response to UV	biological_process	8	Noc2l;Usp47	3	179	53	14759	0.0263921
GO:0030111	regulation of Wnt signaling pathway	biological_process	8	Mdfi;Tmem237	2	179	21	14759	0.0264083
GO:0034399	nuclear periphery	cellular_component	6	Dag1;Map2	2	179	21	14759	0.0264083
GO:0006897	endocytosis	biological_process	7	Cttn;Dennd1a;Dnm1l;Marchf2;Rab5b;Steap2	6	179	189	14759	0.0277723
GO:0032211	negative regulation of telomere maintenance via telomerase	biological_process	12	Hnrnpu;Pml	2	179	22	14759	0.0288211
GO:0046933	proton-transporting ATP synthase activity, rotational mechanism	molecular_function	10	Atp5mc2;Atp6v1a	2	179	22	14759	0.0288211
GO:0042100	B cell proliferation	biological_process	8	Mef2c;Ptprc	2	179	22	14759	0.0288211
GO:2000059	negative regulation of ubiquitin-dependent protein catabolic process	biological_process	11	Anks1a;Pml	2	179	22	14759	0.0288211
GO:0005697	telomerase holoenzyme complex	cellular_component	6	Hnrnpu;Tep1	2	179	22	14759	0.0288211
GO:0031491	nucleosome binding	molecular_function	5	Noc2l;Smarca5	2	179	22	14759	0.0288211
GO:0070064	proline-rich region binding	molecular_function	5	Cttn;Nedd4	2	179	22	14759	0.0288211
GO:0051726	regulation of cell cycle	biological_process	6	Birc2;Cables1;Fbxl3;Phactr4;Ptprc	5	179	143	14759	0.0302095
GO:0009636	response to toxic substance	biological_process	5	Cyp1a1;Dhx15;Dnmt3a;Penk	4	179	97	14759	0.0303355
GO:0006665	sphingolipid metabolic process	biological_process	8	Gba2;Serinc5;Spns2	3	179	56	14759	0.0304235
GO:0008637	apoptotic mitochondrial changes	biological_process	7	Bid;Dnm1l	2	179	23	14759	0.0313185
GO:1904706	negative regulation of vascular smooth muscle cell proliferation	biological_process	9	Adipoq;Mef2c	2	179	23	14759	0.0313185
GO:0051393	alpha-actinin binding	molecular_function	7	Actn1;Dag1	2	179	23	14759	0.0313185
GO:0009898	cytoplasmic side of plasma membrane	cellular_component	5	Birc2;Fgfr3;Ptprc	3	179	57	14759	0.0318354
GO:0002009	morphogenesis of an epithelium	biological_process	6	Dag1;Fgfr3	2	179	24	14759	0.033898
GO:0014902	myotube differentiation	biological_process	8	Mef2c;Stim1	2	179	24	14759	0.033898
GO:0008154	actin polymerization or depolymerization	biological_process	7	Enah;Flii	2	179	24	14759	0.033898
GO:0010906	regulation of glucose metabolic process	biological_process	9	Adipoq;Pdk3	2	179	24	14759	0.033898
GO:0001836	release of cytochrome c from mitochondria	biological_process	8	Bid;Dnm1l	2	179	24	14759	0.033898
GO:0004714	transmembrane receptor protein tyrosine kinase activity	molecular_function	9	Epha5;Fgfr3;Ror2	3	179	59	14759	0.0347603
GO:0032493	response to bacterial lipoprotein	biological_process	7	Tlr6	1	179	3	14759	0.0359475
GO:0042978	ornithine decarboxylase activator activity	molecular_function	6	Azin1	1	179	3	14759	0.0359475
GO:0101020	estrogen 16-alpha-hydroxylase activity	molecular_function	7	Cyp1a1	1	179	3	14759	0.0359475
GO:0004740	pyruvate dehydrogenase (acetyl-transferring) kinase activity	molecular_function	8	Pdk3	1	179	3	14759	0.0359475
GO:2000111	positive regulation of macrophage apoptotic process	biological_process	11	Mef2c	1	179	3	14759	0.0359475
GO:0044855	plasma membrane raft distribution	biological_process	8	Ptprc	1	179	3	14759	0.0359475
GO:0060731	positive regulation of intestinal epithelial structure maintenance	biological_process	9	Slc22a5	1	179	3	14759	0.0359475
GO:0035355	Toll-like receptor 2-Toll-like receptor 6 protein complex	cellular_component	6	Tlr6	1	179	3	14759	0.0359475
GO:2000765	regulation of cytoplasmic translation	biological_process	10	Zfp385a	1	179	3	14759	0.0359475
GO:0070715	sodium-dependent organic cation transport	biological_process	9	Slc22a5	1	179	3	14759	0.0359475
GO:2001045	negative regulation of integrin-mediated signaling pathway	biological_process	9	Phactr4	1	179	3	14759	0.0359475
GO:0022834	ligand-gated channel activity	molecular_function	8	Atp5mc2	1	179	3	14759	0.0359475
GO:0010265	SCF complex assembly	biological_process	7	Cand2	1	179	3	14759	0.0359475
GO:0034211	GTP-dependent protein kinase activity	molecular_function	9	Brd4	1	179	3	14759	0.0359475
GO:1904816	positive regulation of protein localization to chromosome, telomeric region	biological_process	7	Pml	1	179	3	14759	0.0359475
GO:1901407	regulation of phosphorylation of RNA polymerase II C-terminal domain	biological_process	10	Brd4	1	179	3	14759	0.0359475
GO:1902269	positive regulation of polyamine transmembrane transport	biological_process	9	Azin1	1	179	3	14759	0.0359475
GO:1904772	response to tetrachloromethane	biological_process	6	Igf2r	1	179	3	14759	0.0359475
GO:0002118	aggressive behavior	biological_process	5	Penk	1	179	3	14759	0.0359475
GO:0002923	regulation of humoral immune response mediated by circulating immunoglobulin	biological_process	11	Ptprc	1	179	3	14759	0.0359475
GO:0007223	Wnt signaling pathway, calcium modulating pathway	biological_process	9	Ror2	1	179	3	14759	0.0359475
GO:0097022	lymphocyte migration into lymph node	biological_process	7	Wnk1	1	179	3	14759	0.0359475
GO:0007521	muscle cell fate determination	biological_process	6	Mef2c	1	179	3	14759	0.0359475
GO:0072383	plus-end-directed vesicle transport along microtubule	biological_process	11	Kif13a	1	179	3	14759	0.0359475
GO:0030486	smooth muscle dense body	cellular_component	5	Actn1	1	179	3	14759	0.0359475
GO:0099073	mitochondrion-derived vesicle	cellular_component	7	Dnm1l	1	179	3	14759	0.0359475
GO:0008458	carnitine O-octanoyltransferase activity	molecular_function	9	Crot	1	179	3	14759	0.0359475
GO:0006278	RNA-dependent DNA biosynthetic process	biological_process	9	Tep1	1	179	3	14759	0.0359475
GO:1904666	regulation of ubiquitin protein ligase activity	biological_process	12	Dnm1l	1	179	3	14759	0.0359475
GO:0071221	cellular response to bacterial lipopeptide	biological_process	9	Tlr6	1	179	3	14759	0.0359475
GO:0016243	regulation of autophagosome size	biological_process	6	Atp13a2	1	179	3	14759	0.0359475
GO:1905123	regulation of glucosylceramidase activity	biological_process	7	Atp13a2	1	179	3	14759	0.0359475
GO:1903578	regulation of ATP metabolic process	biological_process	6	Dnm1l	1	179	3	14759	0.0359475
GO:0030205	dermatan sulfate metabolic process	biological_process	6	Dse	1	179	3	14759	0.0359475
GO:1904424	regulation of GTP binding	biological_process	6	Arhgef7	1	179	3	14759	0.0359475
GO:0050857	positive regulation of antigen receptor-mediated signaling pathway	biological_process	9	Ptprc	1	179	3	14759	0.0359475
GO:1905395	response to flavonoid	biological_process	6	Dnm1l	1	179	3	14759	0.0359475
GO:0006680	glucosylceramide catabolic process	biological_process	12	Gba2	1	179	3	14759	0.0359475
GO:0008422	beta-glucosidase activity	molecular_function	8	Gba2	1	179	3	14759	0.0359475
GO:0090149	mitochondrial membrane fission	biological_process	7	Dnm1l	1	179	3	14759	0.0359475
GO:0009597	detection of virus	biological_process	8	Serinc5	1	179	3	14759	0.0359475
GO:0021762	substantia nigra development	biological_process	6	Fgfr3	1	179	3	14759	0.0359475
GO:0047757	chondroitin-glucuronate 5-epimerase activity	molecular_function	7	Dse	1	179	3	14759	0.0359475
GO:1902270	(R)-carnitine transmembrane transport	biological_process	8	Slc22a5	1	179	3	14759	0.0359475
GO:1901235	(R)-carnitine transmembrane transporter activity	molecular_function	10	Slc22a5	1	179	3	14759	0.0359475
GO:1902443	negative regulation of ripoptosome assembly involved in necroptotic process	biological_process	8	Birc2	1	179	3	14759	0.0359475
GO:2000473	positive regulation of hematopoietic stem cell migration	biological_process	9	Ptprc	1	179	3	14759	0.0359475
GO:0015226	carnitine transmembrane transporter activity	molecular_function	9	Slc22a5	1	179	3	14759	0.0359475
GO:0021979	hypothalamus cell differentiation	biological_process	6	Hap1	1	179	3	14759	0.0359475
GO:0042498	diacyl lipopeptide binding	molecular_function	6	Tlr6	1	179	3	14759	0.0359475
GO:0071008	U2-type post-mRNA release spliceosomal complex	cellular_component	8	Dhx15	1	179	3	14759	0.0359475
GO:0100026	positive regulation of DNA repair by transcription from RNA polymerase II promoter	biological_process	10	Gtf2i	1	179	3	14759	0.0359475
GO:0098971	anterograde dendritic transport of neurotransmitter receptor complex	biological_process	8	Kif5a	1	179	3	14759	0.0359475
GO:0034263	positive regulation of autophagy in response to ER overload	biological_process	7	Bid	1	179	3	14759	0.0359475
GO:0006720	isoprenoid metabolic process	biological_process	7	Ggps1	1	179	3	14759	0.0359475
GO:0101021	estrogen 2-hydroxylase activity	molecular_function	7	Cyp1a1	1	179	3	14759	0.0359475
GO:0071547	piP-body	cellular_component	9	Tdrkh	1	179	3	14759	0.0359475
GO:0022618	ribonucleoprotein complex assembly	biological_process	8	Shq1	1	179	3	14759	0.0359475
GO:0005519	cytoskeletal regulatory protein binding	molecular_function	6	Actn1	1	179	3	14759	0.0359475
GO:0030292	protein tyrosine kinase inhibitor activity	molecular_function	8	Fgfr1op	1	179	3	14759	0.0359475
GO:0051867	general adaptation syndrome, behavioral process	biological_process	4	Penk	1	179	3	14759	0.0359475
GO:1904183	negative regulation of pyruvate dehydrogenase activity	biological_process	8	Pdk3	1	179	3	14759	0.0359475
GO:0004348	glucosylceramidase activity	molecular_function	7	Gba2	1	179	3	14759	0.0359475
GO:0097752	regulation of DNA stability	biological_process	5	Ddi2	1	179	3	14759	0.0359475
GO:0099631	postsynaptic endocytic zone cytoplasmic component	cellular_component	4	Cltb	1	179	3	14759	0.0359475
GO:0042496	detection of diacyl bacterial lipopeptide	biological_process	10	Tlr6	1	179	3	14759	0.0359475
GO:0009804	coumarin metabolic process	biological_process	7	Cyp1a1	1	179	3	14759	0.0359475
GO:1900063	regulation of peroxisome organization	biological_process	8	Dnm1l	1	179	3	14759	0.0359475
GO:0003185	sinoatrial valve morphogenesis	biological_process	6	Mef2c	1	179	3	14759	0.0359475
GO:0031966	mitochondrial membrane	cellular_component	5	Atp5mc2;Atpsckmt;Bid;Dnm1l;Ogt	5	179	150	14759	0.0360171
GO:0030864	cortical actin cytoskeleton	cellular_component	8	Actn1;Cdh2;Cttn	3	179	60	14759	0.0362732
GO:0005905	clathrin-coated pit	cellular_component	4	Cltb;Cttn;Dnm1l	3	179	60	14759	0.0362732
GO:0030742	GTP-dependent protein binding	molecular_function	5	Dnm1l;Rab5b	2	179	25	14759	0.0365574
GO:0002230	positive regulation of defense response to virus by host	biological_process	9	Parp9;Pml	2	179	25	14759	0.0365574
GO:0080025	phosphatidylinositol-3,5-bisphosphate binding	molecular_function	9	Atp13a2;Kif16b	2	179	26	14759	0.0392943
GO:0051146	striated muscle cell differentiation	biological_process	7	Cdh2;Spag9	2	179	26	14759	0.0392943
GO:0005689	U12-type spliceosomal complex	cellular_component	7	Dhx15;Sf3b3	2	179	26	14759	0.0392943
GO:0007264	small GTPase mediated signal transduction	biological_process	6	Arhgef7;Dock7;Dock9;Ralgds	4	179	106	14759	0.0400472
GO:0007009	plasma membrane organization	biological_process	6	Mpp5;Myof	2	179	27	14759	0.0421065
GO:2000377	regulation of reactive oxygen species metabolic process	biological_process	7	Birc2;Pdk3	2	179	27	14759	0.0421065
GO:0008017	microtubule binding	molecular_function	7	Camsap2;Dnm1l;Kif13a;Kif16b;Kif1c;Kif5a;Map2	7	179	266	14759	0.0436252
GO:0050807	regulation of synapse organization	biological_process	7	Dag1;Nedd4	2	179	28	14759	0.0449917
GO:0005720	nuclear heterochromatin	cellular_component	8	Dnmt3a;Uhrf2	2	179	28	14759	0.0449917
GO:0032094	response to food	biological_process	7	Cyp1a1;Slc25a25	2	179	28	14759	0.0449917
GO:0005856	cytoskeleton	cellular_component	6	Actn1;Camsap2;Cttn;Dag1;Dync1h1;Dync1li2;Enah;Fgfr1op;Fhod3;Hnrnpu;Klc2;Map2;Rab28;Sptan1;Stim1;Tmem216	16	179	832	14759	0.0458351
GO:0051213	dioxygenase activity	molecular_function	5	Egln2;P4ha2	3	179	66	14759	0.0460468
GO:0032991	protein-containing complex	cellular_component	3	Adipoq;Arhgef7;Birc2;Blm;Dnm1l;Hnrnpu;Klc2;Mef2c;Mpp5;Nlrp1a;Ogt;Parp9;Sptan1;Stim1;Top2a	15	179	768	14759	0.0467932
GO:0048050	post-embryonic eye morphogenesis	biological_process	7	Efemp1	1	179	4	14759	0.0476421
GO:1903615	positive regulation of protein tyrosine phosphatase activity	biological_process	13	Ptprc	1	179	4	14759	0.0476421
GO:0090498	extrinsic component of Golgi membrane	cellular_component	6	Gba2	1	179	4	14759	0.0476421
GO:1902897	regulation of postsynaptic density protein 95 clustering	biological_process	10	Cdh2	1	179	4	14759	0.0476421
GO:0061909	autophagosome-lysosome fusion	biological_process	8	Atp13a2	1	179	4	14759	0.0476421
GO:0098963	dendritic transport of messenger ribonucleoprotein complex	biological_process	8	Hnrnpu	1	179	4	14759	0.0476421
GO:1990498	mitotic spindle microtubule	cellular_component	9	Hnrnpu	1	179	4	14759	0.0476421
GO:0061097	regulation of protein tyrosine kinase activity	biological_process	11	Ptprc	1	179	4	14759	0.0476421
GO:0003886	DNA (cytosine-5-)-methyltransferase activity	molecular_function	8	Dnmt3a	1	179	4	14759	0.0476421
GO:1990452	Parkin-FBXW7-Cul1 ubiquitin ligase complex	cellular_component	6	Cul1	1	179	4	14759	0.0476421
GO:0014886	transition between slow and fast fiber	biological_process	8	Gtf2i	1	179	4	14759	0.0476421
GO:0072160	nephron tubule epithelial cell differentiation	biological_process	8	Mef2c	1	179	4	14759	0.0476421
GO:2000584	negative regulation of platelet-derived growth factor receptor-alpha signaling pathway	biological_process	10	Adipoq	1	179	4	14759	0.0476421
GO:0007600	sensory perception	biological_process	6	Penk	1	179	4	14759	0.0476421
GO:0002933	lipid hydroxylation	biological_process	8	Cyp1a1	1	179	4	14759	0.0476421
GO:0036466	synaptic vesicle recycling via endosome	biological_process	7	Dnm1l	1	179	4	14759	0.0476421
GO:0002634	regulation of germinal center formation	biological_process	9	Mef2c	1	179	4	14759	0.0476421
GO:0030208	dermatan sulfate biosynthetic process	biological_process	9	Dse	1	179	4	14759	0.0476421
GO:0060058	positive regulation of apoptotic process involved in mammary gland involution	biological_process	9	Pml	1	179	4	14759	0.0476421
GO:0071726	cellular response to diacyl bacterial lipopeptide	biological_process	10	Tlr6	1	179	4	14759	0.0476421
GO:1905165	regulation of lysosomal protein catabolic process	biological_process	10	Atp13a2	1	179	4	14759	0.0476421
GO:0070889	platelet alpha granule organization	biological_process	8	Zfp385a	1	179	4	14759	0.0476421
GO:0099503	secretory vesicle	cellular_component	7	Dnm1l	1	179	4	14759	0.0476421
GO:0003835	beta-galactoside alpha-2,6-sialyltransferase activity	molecular_function	7	St6gal1	1	179	4	14759	0.0476421
GO:1905773	8-hydroxy-2'-deoxyguanosine DNA binding	molecular_function	10	Blm	1	179	4	14759	0.0476421
GO:0009624	response to nematode	biological_process	7	Cyp1a1	1	179	4	14759	0.0476421
GO:0030263	apoptotic chromosome condensation	biological_process	10	Top2a	1	179	4	14759	0.0476421
GO:1902425	positive regulation of attachment of mitotic spindle microtubules to kinetochore	biological_process	9	Hnrnpu	1	179	4	14759	0.0476421
GO:0001097	TFIIH-class transcription factor complex binding	molecular_function	8	Hnrnpu	1	179	4	14759	0.0476421
GO:0006054	N-acetylneuraminate metabolic process	biological_process	7	St6gal1	1	179	4	14759	0.0476421
GO:0031628	opioid receptor binding	molecular_function	7	Penk	1	179	4	14759	0.0476421
GO:0009008	DNA-methyltransferase activity	molecular_function	7	Dnmt3a	1	179	4	14759	0.0476421
GO:0033633	negative regulation of cell-cell adhesion mediated by integrin	biological_process	8	Wnk1	1	179	4	14759	0.0476421
GO:0033043	regulation of organelle organization	biological_process	7	Camsap2	1	179	4	14759	0.0476421
GO:0099186	structural constituent of postsynapse	molecular_function	5	Actn1	1	179	4	14759	0.0476421
GO:0044027	hypermethylation of CpG island	biological_process	11	Dnmt3a	1	179	4	14759	0.0476421
GO:0002711	positive regulation of T cell mediated immunity	biological_process	10	Ptprc	1	179	4	14759	0.0476421
GO:0032776	DNA methylation on cytosine	biological_process	11	Dnmt3a	1	179	4	14759	0.0476421
GO:0036344	platelet morphogenesis	biological_process	8	Actn1	1	179	4	14759	0.0476421
GO:0031231	intrinsic component of peroxisomal membrane	cellular_component	6	Slc22a5	1	179	4	14759	0.0476421
GO:2001242	regulation of intrinsic apoptotic signaling pathway	biological_process	9	Ptpmt1	1	179	4	14759	0.0476421
GO:0043988	histone H3-S28 phosphorylation	biological_process	12	Rps6ka5	1	179	4	14759	0.0476421
GO:0000962	positive regulation of mitochondrial RNA catabolic process	biological_process	9	Grsf1	1	179	4	14759	0.0476421
GO:1905103	integral component of lysosomal membrane	cellular_component	8	Atp13a2	1	179	4	14759	0.0476421
GO:0001704	formation of primary germ layer	biological_process	5	Kif16b	1	179	4	14759	0.0476421
GO:0061702	inflammasome complex	cellular_component	4	Nlrp1a	1	179	4	14759	0.0476421
GO:0038132	neuregulin binding	molecular_function	6	Itgb4	1	179	4	14759	0.0476421
GO:0090637	inner dense plaque of desmosome	cellular_component	4	Actn1	1	179	4	14759	0.0476421
GO:0098857	membrane microdomain	cellular_component	5	Ptprc	1	179	4	14759	0.0476421
GO:0010510	regulation of acetyl-CoA biosynthetic process from pyruvate	biological_process	10	Pdk3	1	179	4	14759	0.0476421
GO:1904062	regulation of cation transmembrane transport	biological_process	9	Wnk1	1	179	4	14759	0.0476421
GO:0090636	outer dense plaque of desmosome	cellular_component	4	Actn1	1	179	4	14759	0.0476421
GO:0050815	phosphoserine residue binding	molecular_function	7	Nedd4	1	179	4	14759	0.0476421
GO:0030538	embryonic genitalia morphogenesis	biological_process	6	Ror2	1	179	4	14759	0.0476421
GO:0000493	box H/ACA snoRNP assembly	biological_process	10	Shq1	1	179	4	14759	0.0476421
GO:0007016	cytoskeletal anchoring at plasma membrane	biological_process	7	Dag1	1	179	4	14759	0.0476421
GO:0106140	P-TEFb complex binding	molecular_function	5	Brd4	1	179	4	14759	0.0476421
GO:0046209	nitric oxide metabolic process	biological_process	6	Tlr6	1	179	4	14759	0.0476421
GO:0010609	mRNA localization resulting in posttranscriptional regulation of gene expression	biological_process	7	Zfp385a	1	179	4	14759	0.0476421
GO:0008298	intracellular mRNA localization	biological_process	6	Zfp385a	1	179	4	14759	0.0476421
GO:0043242	negative regulation of protein-containing complex disassembly	biological_process	8	Irak3	1	179	4	14759	0.0476421
GO:0004311	farnesyltranstransferase activity	molecular_function	7	Ggps1	1	179	4	14759	0.0476421
GO:0044806	G-quadruplex DNA unwinding	biological_process	9	Blm	1	179	4	14759	0.0476421
GO:0072148	epithelial cell fate commitment	biological_process	6	Fgfr3	1	179	4	14759	0.0476421
GO:0018894	dibenzo-p-dioxin metabolic process	biological_process	6	Cyp1a1	1	179	4	14759	0.0476421
GO:0016262	protein N-acetylglucosaminyltransferase activity	molecular_function	8	Ogt	1	179	4	14759	0.0476421
GO:0061430	bone trabecula morphogenesis	biological_process	6	Fgfr3	1	179	4	14759	0.0476421
GO:0006663	platelet activating factor biosynthetic process	biological_process	10	Chpt1	1	179	4	14759	0.0476421
GO:0097118	neuroligin clustering involved in postsynaptic membrane assembly	biological_process	7	Cdh2	1	179	4	14759	0.0476421
GO:0016071	mRNA metabolic process	biological_process	9	Hnrnpu	1	179	4	14759	0.0476421
GO:0070171	negative regulation of tooth mineralization	biological_process	10	Aspnl1	1	179	4	14759	0.0476421
GO:0050816	phosphothreonine residue binding	molecular_function	7	Nedd4	1	179	4	14759	0.0476421
GO:0005788	endoplasmic reticulum lumen	cellular_component	7	P4ha2;Sil1	3	179	67	14759	0.0477901
GO:0048041	focal adhesion assembly	biological_process	9	Actn1;Cttn	2	179	29	14759	0.0479478
GO:0032418	lysosome localization	biological_process	6	Fam98a;Spag9	2	179	29	14759	0.0479478
GO:0048870	cell motility	biological_process	5	Cttn;Itgb4	2	179	30	14759	0.0509728
GO:0030863	cortical cytoskeleton	cellular_component	7	Cttn;Sptan1	2	179	30	14759	0.0509728
GO:0042147	retrograde transport, endosome to Golgi	biological_process	8	Spag9;Tbc1d5;Ube2o	3	179	70	14759	0.0532116
GO:0000793	condensed chromosome	cellular_component	7	Smarca5;Top2a	2	179	31	14759	0.0540644
GO:0017112	Rab guanyl-nucleotide exchange factor activity	molecular_function	9	Dennd1a;Dennd2c	2	179	31	14759	0.0540644
GO:0090200	positive regulation of release of cytochrome c from mitochondria	biological_process	10	Bid;Dnm1l	2	179	31	14759	0.0540644
GO:0007569	cell aging	biological_process	5	Pml;Prelp	2	179	31	14759	0.0540644
GO:1990830	cellular response to leukemia inhibitory factor	biological_process	8	Enah;Hnrnpu;Pml;Smarca5	4	179	118	14759	0.055445
GO:0005912	adherens junction	cellular_component	5	Cdh2;Dag1;Epha5;Mpp5	4	179	119	14759	0.0568539
GO:0030175	filopodium	cellular_component	7	Dag1;Dync1h1;Enah	3	179	72	14759	0.0569834
GO:0006284	base-excision repair	biological_process	9	Usp47	2	179	32	14759	0.0572207
GO:0032839	dendrite cytoplasm	cellular_component	9	Hnrnpu;Kif5a	2	179	32	14759	0.0572207
GO:0001782	B cell homeostasis	biological_process	6	Mef2c;Spns2	2	179	32	14759	0.0572207
GO:0043153	entrainment of circadian clock by photoperiod	biological_process	8	Fbxl3;Pml	2	179	32	14759	0.0572207
GO:0007257	activation of JUN kinase activity	biological_process	14	Mdfi;Spag9	2	179	32	14759	0.0572207
GO:0043130	ubiquitin binding	molecular_function	6	Birc2;Ddi2;Top2a	3	179	73	14759	0.0589157
GO:0061144	alveolar secondary septum development	biological_process	8	Fgfr3	1	179	5	14759	0.0591956
GO:0030578	PML body organization	biological_process	8	Pml	1	179	5	14759	0.0591956
GO:0019048	modulation by virus of host process	biological_process	7	Dag1	1	179	5	14759	0.0591956
GO:0035666	TRIF-dependent toll-like receptor signaling pathway	biological_process	10	Tlr6	1	179	5	14759	0.0591956
GO:0071723	lipopeptide binding	molecular_function	5	Tlr6	1	179	5	14759	0.0591956
GO:1904579	cellular response to thapsigargin	biological_process	8	Dnm1l	1	179	5	14759	0.0591956
GO:0015697	quaternary ammonium group transport	biological_process	9	Slc22a5	1	179	5	14759	0.0591956
GO:0061821	telomeric D-loop binding	molecular_function	9	Blm	1	179	5	14759	0.0591956
GO:0070988	demethylation	biological_process	4	Cyp1a1	1	179	5	14759	0.0591956
GO:1905037	autophagosome organization	biological_process	7	Atp13a2	1	179	5	14759	0.0591956
GO:0070934	CRD-mediated mRNA stabilization	biological_process	12	Hnrnpu	1	179	5	14759	0.0591956
GO:0070358	actin polymerization-dependent cell motility	biological_process	6	Enah	1	179	5	14759	0.0591956
GO:0060544	regulation of necroptotic process	biological_process	9	Birc2	1	179	5	14759	0.0591956
GO:0060335	positive regulation of interferon-gamma-mediated signaling pathway	biological_process	10	Parp9	1	179	5	14759	0.0591956
GO:0050794	regulation of cellular process	biological_process	5	Wnk1	1	179	5	14759	0.0591956
GO:0016011	dystroglycan complex	cellular_component	6	Dag1	1	179	5	14759	0.0591956
GO:2001255	positive regulation of histone H3-K36 trimethylation	biological_process	13	Brd4	1	179	5	14759	0.0591956
GO:0003720	telomerase activity	molecular_function	9	Tep1	1	179	5	14759	0.0591956
GO:0032483	regulation of Rab protein signal transduction	biological_process	11	Dennd1a	1	179	5	14759	0.0591956
GO:0044571	[2Fe-2S] cluster assembly	biological_process	7	Nfs1	1	179	5	14759	0.0591956
GO:2000779	regulation of double-strand break repair	biological_process	10	Pml	1	179	5	14759	0.0591956
GO:0038116	chemokine (C-C motif) ligand 21 signaling pathway	biological_process	8	Wnk1	1	179	5	14759	0.0591956
GO:0016139	glycoside catabolic process	biological_process	8	Gba2	1	179	5	14759	0.0591956
GO:0072676	lymphocyte migration	biological_process	5	Spns2	1	179	5	14759	0.0591956
GO:0071955	recycling endosome to Golgi transport	biological_process	9	Tbc1d14	1	179	5	14759	0.0591956
GO:0030130	clathrin coat of trans-Golgi network vesicle	cellular_component	9	Cltb	1	179	5	14759	0.0591956
GO:0006778	porphyrin-containing compound metabolic process	biological_process	7	Cyp1a1	1	179	5	14759	0.0591956
GO:0035886	vascular smooth muscle cell differentiation	biological_process	8	Epc1	1	179	5	14759	0.0591956
GO:2001016	positive regulation of skeletal muscle cell differentiation	biological_process	8	Mef2c	1	179	5	14759	0.0591956
GO:0000322	storage vacuole	cellular_component	7	Arhgef7	1	179	5	14759	0.0591956
GO:0055069	zinc ion homeostasis	biological_process	11	Atp13a2	1	179	5	14759	0.0591956
GO:0097581	lamellipodium organization	biological_process	7	Cttn	1	179	5	14759	0.0591956
GO:0030947	regulation of vascular endothelial growth factor receptor signaling pathway	biological_process	8	Myof	1	179	5	14759	0.0591956
GO:0120199	cone photoreceptor outer segment	cellular_component	6	Tmem237	1	179	5	14759	0.0591956
GO:0015879	carnitine transport	biological_process	11	Slc22a5	1	179	5	14759	0.0591956
GO:0015651	quaternary ammonium group transmembrane transporter activity	molecular_function	8	Slc22a5	1	179	5	14759	0.0591956
GO:0000403	Y-form DNA binding	molecular_function	8	Blm	1	179	5	14759	0.0591956
GO:0046527	glucosyltransferase activity	molecular_function	7	Gba2	1	179	5	14759	0.0591956
GO:0046483	heterocycle metabolic process	biological_process	5	Cyp1a1	1	179	5	14759	0.0591956
GO:1902513	regulation of organelle transport along microtubule	biological_process	8	Hap1	1	179	5	14759	0.0591956
GO:0010387	COP9 signalosome assembly	biological_process	8	Cops7a	1	179	5	14759	0.0591956
GO:0031084	BLOC-2 complex	cellular_component	5	Hps5	1	179	5	14759	0.0591956
GO:0003138	primary heart field specification	biological_process	8	Mef2c	1	179	5	14759	0.0591956
GO:0002378	immunoglobulin biosynthetic process	biological_process	7	Ptprc	1	179	5	14759	0.0591956
GO:0010936	negative regulation of macrophage cytokine production	biological_process	9	Irak3	1	179	5	14759	0.0591956
GO:1990079	cartilage homeostasis	biological_process	8	Cytl1	1	179	5	14759	0.0591956
GO:0070977	bone maturation	biological_process	7	Fgfr3	1	179	5	14759	0.0591956
GO:0060025	regulation of synaptic activity	biological_process	9	Mef2c	1	179	5	14759	0.0591956
GO:0001515	opioid peptide activity	molecular_function	7	Penk	1	179	5	14759	0.0591956
GO:0070585	protein localization to mitochondrion	biological_process	8	Dnm1l	1	179	5	14759	0.0591956
GO:0090080	positive regulation of MAPKKK cascade by fibroblast growth factor receptor signaling pathway	biological_process	9	Fgfr3	1	179	5	14759	0.0591956
GO:0070445	regulation of oligodendrocyte progenitor proliferation	biological_process	10	Cdh2	1	179	5	14759	0.0591956
GO:0010712	regulation of collagen metabolic process	biological_process	6	Fgfr3	1	179	5	14759	0.0591956
GO:0035878	nail development	biological_process	5	Itgb4	1	179	5	14759	0.0591956
GO:0045200	establishment of neuroblast polarity	biological_process	6	Dock7	1	179	5	14759	0.0591956
GO:0009812	flavonoid metabolic process	biological_process	5	Cyp1a1	1	179	5	14759	0.0591956
GO:1990769	proximal neuron projection	cellular_component	6	Map2	1	179	5	14759	0.0591956
GO:0031587	positive regulation of inositol 1,4,5-trisphosphate-sensitive calcium-release channel activity	biological_process	11	Hap1	1	179	5	14759	0.0591956
GO:0055059	asymmetric neuroblast division	biological_process	6	Tead3	1	179	5	14759	0.0591956
GO:0045345	positive regulation of MHC class I biosynthetic process	biological_process	9	Pml	1	179	5	14759	0.0591956
GO:0035252	UDP-xylosyltransferase activity	molecular_function	7	Gxylt1	1	179	5	14759	0.0591956
GO:0003916	DNA topoisomerase activity	molecular_function	5	Top2a	1	179	5	14759	0.0591956
GO:0097411	hypoxia-inducible factor-1alpha signaling pathway	biological_process	5	Pdk3	1	179	5	14759	0.0591956
GO:2000002	negative regulation of DNA damage checkpoint	biological_process	9	Brd4	1	179	5	14759	0.0591956
GO:0090116	C-5 methylation of cytosine	biological_process	12	Dnmt3a	1	179	5	14759	0.0591956
GO:0045601	regulation of endothelial cell differentiation	biological_process	8	Apold1	1	179	5	14759	0.0591956
GO:1902527	positive regulation of protein monoubiquitination	biological_process	12	Birc2	1	179	5	14759	0.0591956
GO:0060019	radial glial cell differentiation	biological_process	7	Cdh2	1	179	5	14759	0.0591956
GO:0015936	coenzyme A metabolic process	biological_process	7	Crot	1	179	5	14759	0.0591956
GO:0023016	signal transduction by trans-phosphorylation	biological_process	11	Wnk1	1	179	5	14759	0.0591956
GO:0097677	STAT family protein binding	molecular_function	5	Parp9	1	179	5	14759	0.0591956
GO:0042904	9-cis-retinoic acid biosynthetic process	biological_process	12	Cyp1a1	1	179	5	14759	0.0591956
GO:0032777	Piccolo NuA4 histone acetyltransferase complex	cellular_component	10	Epc1	1	179	5	14759	0.0591956
GO:0048514	blood vessel morphogenesis	biological_process	6	Cdh2;Nedd4	2	179	33	14759	0.0604397
GO:0008180	COP9 signalosome	cellular_component	4	Cops7a;Dock7	2	179	33	14759	0.0604397
GO:0043001	Golgi to plasma membrane protein transport	biological_process	10	Golga4;Kif13a	2	179	33	14759	0.0604397
GO:0060612	adipose tissue development	biological_process	7	Dyrk1b;Slc25a25	2	179	33	14759	0.0604397
GO:0006493	protein O-linked glycosylation	biological_process	10	Ogt;Pomgnt2	2	179	33	14759	0.0604397
GO:0061025	membrane fusion	biological_process	6	Dnm1l;Myof	2	179	33	14759	0.0604397
GO:0043010	camera-type eye development	biological_process	8	Cyp1a1;Efemp1;Slc25a25	3	179	74	14759	0.0608787
GO:0042995	cell projection	cellular_component	4	Actn1;Arhgef7;Aspnl1;Cttn;Enah;Fgfr1op;Gtf2i;Mpp5;Ogt;Rab28;Tmem216;Tmem237	12	179	599	14759	0.0610524
GO:0045471	response to ethanol	biological_process	6	Adipoq;Atp5mc2;Birc2;Dnmt3a;Penk	5	179	175	14759	0.0620831
GO:0012505	endomembrane system	cellular_component	4	Dnm1l;Mpp5;Rab28;Rab5b	4	179	123	14759	0.0626803
GO:0032922	circadian regulation of gene expression	biological_process	5	Hnrnpu;Ogt;Pml	3	179	75	14759	0.062872
GO:0009611	response to wounding	biological_process	5	Cyp1a1;Itgb4;Ripor1	3	179	75	14759	0.062872
GO:0030672	synaptic vesicle membrane	cellular_component	4	Cltb;Dnm1l;Sema4c	3	179	75	14759	0.062872
GO:0048013	ephrin receptor signaling pathway	biological_process	8	Anks1a;Epha5	2	179	34	14759	0.0637193
GO:0033189	response to vitamin A	biological_process	9	Cyp1a1;Dnmt3a	2	179	34	14759	0.0637193
GO:0005777	peroxisome	cellular_component	7	Crot;Dnm1l;Mff;Slc22a5	4	179	125	14759	0.0657073
GO:0031252	cell leading edge	cellular_component	4	Actn1;Itgb4;Ripor1	3	179	77	14759	0.0669485
GO:0045165	cell fate commitment	biological_process	5	Mef2c;Pml;Ror2	3	179	77	14759	0.0669485
GO:0043123	positive regulation of I-kappaB kinase/NF-kappaB signaling	biological_process	10	Adipoq;Birc2;Brd4;Tlr6	4	179	126	14759	0.067249
GO:0018108	peptidyl-tyrosine phosphorylation	biological_process	10	Efemp1;Epha5;Fgfr3;Ror2	4	179	126	14759	0.067249
GO:0004197	cysteine-type endopeptidase activity	molecular_function	8	Usp24;Usp47	3	179	78	14759	0.0690312
GO:0042981	regulation of apoptotic process	biological_process	8	Bid;Birc2;Igf2r;Nlrp1a;Pea15	5	179	181	14759	0.0695914
GO:0016740	transferase activity	molecular_function	4	Atpsckmt;Birc2;Chpt1;Crot;Dnmt3a;Dyrk1b;Fgfr3;Gba2;Ggps1;Gxylt1;Marchf2;Mast3;Mpp5;Nedd4;Ogt;Parp9;Pdk3;Pigc;Pomgnt2;Rps6ka5;St6gal1;Uhrf2;Wnk1	23	179	1373	14759	0.0697453
GO:0017137	Rab GTPase binding	molecular_function	9	Dennd1a;Dnm1l;Kif16b;Tbc1d5	4	179	128	14759	0.0703885
GO:0008543	fibroblast growth factor receptor signaling pathway	biological_process	8	Fgfr3;Kif16b	2	179	36	14759	0.070453
GO:0010332	response to gamma radiation	biological_process	7	Pml;Ptprc	2	179	36	14759	0.070453
GO:0030100	regulation of endocytosis	biological_process	7	Arfgap1;Rab5b	2	179	36	14759	0.070453
GO:0072757	cellular response to camptothecin	biological_process	7	Blm	1	179	6	14759	0.0706097
GO:0090235	regulation of metaphase plate congression	biological_process	8	Dync1h1	1	179	6	14759	0.0706097
GO:1990752	microtubule end	cellular_component	6	Camsap2	1	179	6	14759	0.0706097
GO:0051791	medium-chain fatty acid metabolic process	biological_process	10	Crot	1	179	6	14759	0.0706097
GO:1904261	positive regulation of basement membrane assembly involved in embryonic body morphogenesis	biological_process	9	Dag1	1	179	6	14759	0.0706097
GO:1905242	response to 3,3',5-triiodo-L-thyronine	biological_process	7	Atp5mc2	1	179	6	14759	0.0706097
GO:2000373	positive regulation of DNA topoisomerase (ATP-hydrolyzing) activity	biological_process	8	Hnrnpu	1	179	6	14759	0.0706097
GO:1902523	positive regulation of protein K63-linked ubiquitination	biological_process	13	Birc2	1	179	6	14759	0.0706097
GO:0051098	regulation of binding	biological_process	5	Blm	1	179	6	14759	0.0706097
GO:0010694	positive regulation of alkaline phosphatase activity	biological_process	12	Mef2c	1	179	6	14759	0.0706097
GO:0034349	glial cell apoptotic process	biological_process	7	Bid	1	179	6	14759	0.0706097
GO:0071396	cellular response to lipid	biological_process	7	Dnm1l	1	179	6	14759	0.0706097
GO:0043045	DNA methylation involved in embryo development	biological_process	11	Dnmt3a	1	179	6	14759	0.0706097
GO:0016589	NURF complex	cellular_component	9	Smarca5	1	179	6	14759	0.0706097
GO:0050897	cobalt ion binding	molecular_function	8	Pml	1	179	6	14759	0.0706097
GO:0043987	histone H3-S10 phosphorylation	biological_process	12	Rps6ka5	1	179	6	14759	0.0706097
GO:2001013	epithelial cell proliferation involved in renal tubule morphogenesis	biological_process	5	Mef2c	1	179	6	14759	0.0706097
GO:1902857	positive regulation of non-motile cilium assembly	biological_process	11	Hap1	1	179	6	14759	0.0706097
GO:0033177	proton-transporting two-sector ATPase complex, proton-transporting domain	cellular_component	5	Atp5mc2	1	179	6	14759	0.0706097
GO:0097300	programmed necrotic cell death	biological_process	6	Nlrp1a	1	179	6	14759	0.0706097
GO:0006658	phosphatidylserine metabolic process	biological_process	6	Serinc5	1	179	6	14759	0.0706097
GO:0097035	regulation of membrane lipid distribution	biological_process	6	Gba2	1	179	6	14759	0.0706097
GO:0030204	chondroitin sulfate metabolic process	biological_process	6	Dse	1	179	6	14759	0.0706097
GO:1903223	positive regulation of oxidative stress-induced neuron death	biological_process	9	Tlr6	1	179	6	14759	0.0706097
GO:0071871	response to epinephrine	biological_process	8	Penk	1	179	6	14759	0.0706097
GO:0098835	presynaptic endocytic zone membrane	cellular_component	5	Dnm1l	1	179	6	14759	0.0706097
GO:1990414	replication-born double-strand break repair via sister chromatid exchange	biological_process	11	Blm	1	179	6	14759	0.0706097
GO:1990001	inhibition of cysteine-type endopeptidase activity involved in apoptotic process	biological_process	11	Birc2	1	179	6	14759	0.0706097
GO:0060297	regulation of sarcomere organization	biological_process	7	Mef2c	1	179	6	14759	0.0706097
GO:0140289	protein mono-ADP-ribosylation	biological_process	10	Parp9	1	179	6	14759	0.0706097
GO:0006933	negative regulation of cell adhesion involved in substrate-bound cell migration	biological_process	7	Ptprc	1	179	6	14759	0.0706097
GO:0031497	chromatin assembly	biological_process	7	Noc2l	1	179	6	14759	0.0706097
GO:0070937	CRD-mediated mRNA stability complex	cellular_component	4	Hnrnpu	1	179	6	14759	0.0706097
GO:0032651	regulation of interleukin-1 beta production	biological_process	8	S1pr3	1	179	6	14759	0.0706097
GO:0010041	response to iron(III) ion	biological_process	8	Cyp1a1	1	179	6	14759	0.0706097
GO:0003211	cardiac ventricle formation	biological_process	6	Mef2c	1	179	6	14759	0.0706097
GO:0032451	demethylase activity	molecular_function	4	Cyp1a1	1	179	6	14759	0.0706097
GO:0000792	heterochromatin	cellular_component	7	Dnmt3a;Pml	2	179	37	14759	0.0739033
GO:0043523	regulation of neuron apoptotic process	biological_process	9	Egln2;Mef2c	2	179	37	14759	0.0739033
GO:2001235	positive regulation of apoptotic signaling pathway	biological_process	9	Bid;Pml	2	179	37	14759	0.0739033
GO:0043154	negative regulation of cysteine-type endopeptidase activity involved in apoptotic process	biological_process	10	Birc2;Usp47	3	179	81	14759	0.075453
GO:0001725	stress fiber	cellular_component	7	AABR07007032;Actn1;Enah	3	179	81	14759	0.075453
GO:0005903	brush border	cellular_component	5	Actn1;Dnm1l;Flii	3	179	81	14759	0.075453
GO:0071944	cell periphery	cellular_component	4	Adipoq;Epha5;Ptprc	3	179	81	14759	0.075453
GO:0042752	regulation of circadian rhythm	biological_process	5	Fbxl3;Pml;Top2a	3	179	81	14759	0.075453
GO:0007015	actin filament organization	biological_process	6	Actn1;Coro6;Enah;Fhod3	4	179	132	14759	0.0768895
GO:0007173	epidermal growth factor receptor signaling pathway	biological_process	9	Efemp1;Kif16b	2	179	38	14759	0.0774069
GO:0048488	synaptic vesicle endocytosis	biological_process	9	Dennd1a;RGD1307100	2	179	38	14759	0.0774069
GO:0016579	protein deubiquitination	biological_process	9	Usp24;Usp47	3	179	83	14759	0.0798759
GO:0045071	negative regulation of viral genome replication	biological_process	10	Ilf3;Mx2	2	179	39	14759	0.0809618
GO:0046777	protein autophosphorylation	biological_process	10	Brd4;Dyrk1b;Fgfr3;Irak3;Wnk1	5	179	190	14759	0.0817529
GO:0032692	negative regulation of interleukin-1 production	biological_process	8	Pml	1	179	7	14759	0.0818861
GO:0016780	phosphotransferase activity, for other substituted phosphate groups	molecular_function	6	Chpt1	1	179	7	14759	0.0818861
GO:0000729	DNA double-strand break processing	biological_process	8	Blm	1	179	7	14759	0.0818861
GO:0006265	DNA topological change	biological_process	8	Top2a	1	179	7	14759	0.0818861
GO:0097442	CA3 pyramidal cell dendrite	cellular_component	7	Map2	1	179	7	14759	0.0818861
GO:0072669	tRNA-splicing ligase complex	cellular_component	4	Fam98a	1	179	7	14759	0.0818861
GO:0061087	positive regulation of histone H3-K27 methylation	biological_process	12	Ogt	1	179	7	14759	0.0818861
GO:2000467	positive regulation of glycogen (starch) synthase activity	biological_process	8	Adipoq	1	179	7	14759	0.0818861
GO:0016241	regulation of macroautophagy	biological_process	9	Atp13a2	1	179	7	14759	0.0818861
GO:0001915	negative regulation of T cell mediated cytotoxicity	biological_process	8	Ptprc	1	179	7	14759	0.0818861
GO:0015677	copper ion import	biological_process	11	Steap2	1	179	7	14759	0.0818861
GO:2000302	positive regulation of synaptic vesicle exocytosis	biological_process	8	Dnm1l	1	179	7	14759	0.0818861
GO:1905451	positive regulation of Fc-gamma receptor signaling pathway involved in phagocytosis	biological_process	8	Ptprc	1	179	7	14759	0.0818861
GO:0032388	positive regulation of intracellular transport	biological_process	8	Dync1h1	1	179	7	14759	0.0818861
GO:0061333	renal tubule morphogenesis	biological_process	8	Mef2c	1	179	7	14759	0.0818861
GO:0043237	laminin-1 binding	molecular_function	6	Dag1	1	179	7	14759	0.0818861
GO:0072102	glomerulus morphogenesis	biological_process	5	Mef2c	1	179	7	14759	0.0818861
GO:1905832	positive regulation of spindle assembly	biological_process	10	Dync1h1	1	179	7	14759	0.0818861
GO:1900020	positive regulation of protein kinase C activity	biological_process	13	Ror2	1	179	7	14759	0.0818861
GO:0048285	organelle fission	biological_process	6	Dnm1l	1	179	7	14759	0.0818861
GO:0017176	phosphatidylinositol N-acetylglucosaminyltransferase activity	molecular_function	8	Pigc	1	179	7	14759	0.0818861
GO:0070938	contractile ring	cellular_component	4	Dag1	1	179	7	14759	0.0818861
GO:0045294	alpha-catenin binding	molecular_function	5	Cdh2	1	179	7	14759	0.0818861
GO:0032050	clathrin heavy chain binding	molecular_function	6	Cltb	1	179	7	14759	0.0818861
GO:0005001	transmembrane receptor protein tyrosine phosphatase activity	molecular_function	10	Ptprc	1	179	7	14759	0.0818861
GO:0034136	negative regulation of toll-like receptor 2 signaling pathway	biological_process	8	Tlr6	1	179	7	14759	0.0818861
GO:0048227	plasma membrane to endosome transport	biological_process	7	Rab5b	1	179	7	14759	0.0818861
GO:0032280	symmetric synapse	cellular_component	5	Penk	1	179	7	14759	0.0818861
GO:0032237	activation of store-operated calcium channel activity	biological_process	10	Stim1	1	179	7	14759	0.0818861
GO:0001919	regulation of receptor recycling	biological_process	6	Kif16b	1	179	7	14759	0.0818861
GO:0032592	integral component of mitochondrial membrane	cellular_component	7	Bid	1	179	7	14759	0.0818861
GO:0043615	astrocyte cell migration	biological_process	8	Arhgef7	1	179	7	14759	0.0818861
GO:0051880	G-quadruplex DNA binding	molecular_function	7	Blm	1	179	7	14759	0.0818861
GO:0006657	CDP-choline pathway	biological_process	11	Chpt1	1	179	7	14759	0.0818861
GO:0010637	negative regulation of mitochondrial fusion	biological_process	10	Dnm1l	1	179	7	14759	0.0818861
GO:0043996	histone acetyltransferase activity (H4-K8 specific	molecular_function	13	Ogt	1	179	7	14759	0.0818861
GO:0000183	chromatin silencing at rDNA	biological_process	6	Smarca5	1	179	7	14759	0.0818861
GO:0060137	maternal process involved in parturition	biological_process	5	Cyp1a1	1	179	7	14759	0.0818861
GO:0000405	bubble DNA binding	molecular_function	8	Blm	1	179	7	14759	0.0818861
GO:0009609	response to symbiotic bacterium	biological_process	8	Slc22a5	1	179	7	14759	0.0818861
GO:0060385	axonogenesis involved in innervation	biological_process	10	Fgfr3	1	179	7	14759	0.0818861
GO:0032677	regulation of interleukin-8 production	biological_process	7	Ptprc	1	179	7	14759	0.0818861
GO:0008391	arachidonic acid monooxygenase activity	molecular_function	6	Cyp1a1	1	179	7	14759	0.0818861
GO:0009378	four-way junction helicase activity	molecular_function	11	Blm	1	179	7	14759	0.0818861
GO:0070212	protein poly-ADP-ribosylation	biological_process	10	Parp9	1	179	7	14759	0.0818861
GO:0002903	negative regulation of B cell apoptotic process	biological_process	12	Noc2l	1	179	7	14759	0.0818861
GO:0043995	histone acetyltransferase activity (H4-K5 specific	molecular_function	13	Ogt	1	179	7	14759	0.0818861
GO:0006919	activation of cysteine-type endopeptidase activity involved in apoptotic process	biological_process	11	Bid;Nlrp1a;Pml	3	179	84	14759	0.082129
GO:0031647	regulation of protein stability	biological_process	5	Ddi2;Usp47	3	179	84	14759	0.082129
GO:0043231	intracellular membrane-bounded organelle	cellular_component	5	Cltb;Crot;Cyp1a1;Dennd1a;Dnm1l;Mef2c;Myof;P4ha2;Rab5b;Serinc5;Sptan1;Tbc1d14;Tbc1d5;Vps37c	15	179	837	14759	0.0841018
GO:0006469	negative regulation of protein kinase activity	biological_process	11	Fgfr1op;Ptprc;Wnk1	3	179	85	14759	0.0844093
GO:0005201	extracellular matrix structural constituent	molecular_function	4	NEWGENE_621351;Prelp	2	179	40	14759	0.0845664
GO:0005547	phosphatidylinositol-3,4,5-trisphosphate binding	molecular_function	8	Kif16b;Ogt	2	179	40	14759	0.0845664
GO:2001244	positive regulation of intrinsic apoptotic signaling pathway	biological_process	10	Bid;Dnm1l	2	179	40	14759	0.0845664
GO:0030307	positive regulation of cell growth	biological_process	7	Fgfr1op;Usp47	3	179	86	14759	0.0867165
GO:0030890	positive regulation of B cell proliferation	biological_process	11	Mef2c;Ptprc	2	179	41	14759	0.088219
GO:0043507	positive regulation of JUN kinase activity	biological_process	13	Ror2;Tlr6	2	179	41	14759	0.088219
GO:0036459	thiol-dependent ubiquitinyl hydrolase activity	molecular_function	9	Usp24;Usp47	3	179	87	14759	0.0890504
GO:0030030	cell projection organization	biological_process	5	Fgfr1op;Tmem216;Tmem237	3	179	87	14759	0.0890504
GO:0001654	eye development	biological_process	7	Meis3;Sall2	2	179	42	14759	0.0919179
GO:0097191	extrinsic apoptotic signaling pathway	biological_process	6	Bid;Pml	2	179	42	14759	0.0919179
GO:0030122	AP-2 adaptor complex	cellular_component	8	Tbc1d5	1	179	8	14759	0.0930265
GO:0030427	site of polarized growth	cellular_component	4	Cttn	1	179	8	14759	0.0930265
GO:1990910	response to hypobaric hypoxia	biological_process	6	Dnm1l	1	179	8	14759	0.0930265
GO:1902617	response to fluoride	biological_process	6	Aspnl1	1	179	8	14759	0.0930265
GO:0010216	maintenance of DNA methylation	biological_process	8	Uhrf2	1	179	8	14759	0.0930265
GO:0060113	inner ear receptor cell differentiation	biological_process	8	Fgfr3	1	179	8	14759	0.0930265
GO:0006333	chromatin assembly or disassembly	biological_process	6	Smarca5	1	179	8	14759	0.0930265
GO:0040016	embryonic cleavage	biological_process	5	Top2a	1	179	8	14759	0.0930265
GO:0090188	negative regulation of pancreatic juice secretion	biological_process	9	Wnk1	1	179	8	14759	0.0930265
GO:0016266	O-glycan processing	biological_process	11	Gxylt1	1	179	8	14759	0.0930265
GO:0051271	negative regulation of cellular component movement	biological_process	7	Actn1	1	179	8	14759	0.0930265
GO:0046972	histone acetyltransferase activity (H4-K16 specific	molecular_function	13	Ogt	1	179	8	14759	0.0930265
GO:0032059	bleb	cellular_component	6	Ptprc	1	179	8	14759	0.0930265
GO:0008569	ATP-dependent microtubule motor activity, minus-end-directed	molecular_function	12	Dync1h1	1	179	8	14759	0.0930265
GO:0006266	DNA ligation	biological_process	8	Top2a	1	179	8	14759	0.0930265
GO:0030132	clathrin coat of coated pit	cellular_component	8	Cltb	1	179	8	14759	0.0930265
GO:0014037	Schwann cell differentiation	biological_process	7	Dag1	1	179	8	14759	0.0930265
GO:0055012	ventricular cardiac muscle cell differentiation	biological_process	8	Mef2c	1	179	8	14759	0.0930265
GO:0060055	angiogenesis involved in wound healing	biological_process	6	Dag1	1	179	8	14759	0.0930265
GO:0036310	annealing helicase activity	molecular_function	9	Blm	1	179	8	14759	0.0930265
GO:2000481	positive regulation of cAMP-dependent protein kinase activity	biological_process	13	Adipoq	1	179	8	14759	0.0930265
GO:0120200	rod photoreceptor outer segment	cellular_component	6	Tmem237	1	179	8	14759	0.0930265
GO:0009308	amine metabolic process	biological_process	6	Cyp1a1	1	179	8	14759	0.0930265
GO:0060536	cartilage morphogenesis	biological_process	6	Mef2c	1	179	8	14759	0.0930265
GO:1990845	adaptive thermogenesis	biological_process	4	Hnrnpu	1	179	8	14759	0.0930265
GO:0038066	p38MAPK cascade	biological_process	13	Fgfr3	1	179	8	14759	0.0930265
GO:0003374	dynamin family protein polymerization involved in mitochondrial fission	biological_process	10	Dnm1l	1	179	8	14759	0.0930265
GO:0097345	mitochondrial outer membrane permeabilization	biological_process	10	Bid	1	179	8	14759	0.0930265
GO:0035749	myelin sheath adaxonal region	cellular_component	4	Mpp5	1	179	8	14759	0.0930265
GO:0008432	JUN kinase binding	molecular_function	8	Spag9	1	179	8	14759	0.0930265
GO:0097062	dendritic spine maintenance	biological_process	6	Cttn	1	179	8	14759	0.0930265
GO:0035612	AP-2 adaptor complex binding	molecular_function	5	Tbc1d5	1	179	8	14759	0.0930265
GO:0061484	hematopoietic stem cell homeostasis	biological_process	7	Ubap2l	1	179	8	14759	0.0930265
GO:0018023	peptidyl-lysine trimethylation	biological_process	12	Atpsckmt	1	179	8	14759	0.0930265
GO:0072542	protein phosphatase activator activity	molecular_function	7	Phactr4	1	179	8	14759	0.0930265
GO:1902459	positive regulation of stem cell population maintenance	biological_process	7	Tead3	1	179	8	14759	0.0930265
GO:1902108	regulation of mitochondrial membrane permeability involved in apoptotic process	biological_process	8	Bid	1	179	8	14759	0.0930265
GO:0048273	mitogen-activated protein kinase p38 binding	molecular_function	9	Spag9	1	179	8	14759	0.0930265
GO:0044331	cell-cell adhesion mediated by cadherin	biological_process	6	Cdh2	1	179	8	14759	0.0930265
GO:0008091	spectrin	cellular_component	6	Sptan1	1	179	8	14759	0.0930265
GO:0006930	substrate-dependent cell migration, cell extension	biological_process	8	Cttn	1	179	8	14759	0.0930265
GO:0005007	fibroblast growth factor-activated receptor activity	molecular_function	10	Fgfr3	1	179	8	14759	0.0930265
GO:0030125	clathrin vesicle coat	cellular_component	8	Cltb	1	179	8	14759	0.0930265
GO:0051782	negative regulation of cell division	biological_process	7	Blm	1	179	8	14759	0.0930265
GO:0010518	positive regulation of phospholipase activity	biological_process	9	Fgfr3	1	179	8	14759	0.0930265
GO:0032287	peripheral nervous system myelin maintenance	biological_process	8	Mpp5	1	179	8	14759	0.0930265
GO:0140052	cellular response to oxidised low-density lipoprotein particle stimulus	biological_process	6	Tlr6	1	179	8	14759	0.0930265
GO:0006346	methylation-dependent chromatin silencing	biological_process	6	Dnmt3a	1	179	8	14759	0.0930265
GO:0045652	regulation of megakaryocyte differentiation	biological_process	8	Mef2c	1	179	8	14759	0.0930265
GO:0045650	negative regulation of macrophage differentiation	biological_process	10	Adipoq	1	179	8	14759	0.0930265
GO:0005004	GPI-linked ephrin receptor activity	molecular_function	11	Epha5	1	179	8	14759	0.0930265
GO:0043279	response to alkaloid	biological_process	7	Dhx15	1	179	8	14759	0.0930265
GO:0007182	common-partner SMAD protein phosphorylation	biological_process	10	Pml	1	179	8	14759	0.0930265
GO:0071546	pi-body	cellular_component	9	Tdrkh	1	179	8	14759	0.0930265
GO:0043025	neuronal cell body	cellular_component	5	Arhgef7;Atp13a2;Dennd1a;Gtf2i;Kif5a;Map2;Nlrp1a;Penk;Ror2;Zfp385a	10	179	513	14759	0.0949744
GO:0030032	lamellipodium assembly	biological_process	8	AABR07007032;Arhgef7	2	179	43	14759	0.0956615
GO:0035869	ciliary transition zone	cellular_component	5	Tmem216;Tmem237	2	179	43	14759	0.0956615
GO:0045893	positive regulation of transcription, DNA-templated	biological_process	9	Bicral;Blm;Brd4;Dyrk1b;Ilf3;Med13;Mef2c;Parp9;Pml;Ror2;Smarca5;Zfp496	12	179	650	14759	0.0975213
GO:0004843	thiol-dependent ubiquitin-specific protease activity	molecular_function	10	Usp24;Usp47	3	179	91	14759	0.0986449
GO:0065003	protein-containing complex assembly	biological_process	6	Bid;Dnm1l;Pml	3	179	91	14759	0.0986449
GO:0046034	ATP metabolic process	biological_process	4	Atp6v1a;Slc25a25	2	179	44	14759	0.099448
GO:0045214	sarcomere organization	biological_process	9	Actn1;Fhod3	2	179	44	14759	0.099448
GO:0042393	histone binding	molecular_function	5	Noc2l;Parp9;Smarca5;Uhrf2	4	179	145	14759	0.0999943
GO:0043278	response to morphine	biological_process	6	Pea15;Penk	2	179	45	14759	0.103276
GO:0032266	phosphatidylinositol-3-phosphate binding	molecular_function	8	Dennd1a;Kif16b	2	179	45	14759	0.103276
GO:0030501	positive regulation of bone mineralization	biological_process	8	Fgfr3;Mef2c	2	179	45	14759	0.103276
GO:0001726	ruffle	cellular_component	6	Actn1;Arhgef7;Cttn	3	179	93	14759	0.103593
GO:0001960	negative regulation of cytokine-mediated signaling pathway	biological_process	9	Ptprc	1	179	9	14759	0.104032
GO:2000271	positive regulation of fibroblast apoptotic process	biological_process	10	Bid	1	179	9	14759	0.104032
GO:0032288	myelin assembly	biological_process	7	Mpp5	1	179	9	14759	0.104032
GO:0003680	AT DNA binding	molecular_function	9	Mef2c	1	179	9	14759	0.104032
GO:0098871	postsynaptic actin cytoskeleton	cellular_component	8	Cttn	1	179	9	14759	0.104032
GO:0002115	store-operated calcium entry	biological_process	11	Stim1	1	179	9	14759	0.104032
GO:0035984	cellular response to trichostatin A	biological_process	8	Mef2c	1	179	9	14759	0.104032
GO:0036295	cellular response to increased oxygen levels	biological_process	7	Atp6v1a	1	179	9	14759	0.104032
GO:0044770	cell cycle phase transition	biological_process	5	Ptprc	1	179	9	14759	0.104032
GO:0000722	telomere maintenance via recombination	biological_process	9	Tep1	1	179	9	14759	0.104032
GO:0006929	substrate-dependent cell migration	biological_process	7	Anks1a	1	179	9	14759	0.104032
GO:0043983	histone H4-K12 acetylation	biological_process	12	Brd4	1	179	9	14759	0.104032
GO:1905563	negative regulation of vascular endothelial cell proliferation	biological_process	10	Mef2c	1	179	9	14759	0.104032
GO:0052548	regulation of endopeptidase activity	biological_process	10	Atp13a2	1	179	9	14759	0.104032
GO:1990316	Atg1/ULK1 kinase complex	cellular_component	6	Tbc1d5	1	179	9	14759	0.104032
GO:0061820	telomeric D-loop disassembly	biological_process	10	Blm	1	179	9	14759	0.104032
GO:0016559	peroxisome fission	biological_process	7	Dnm1l	1	179	9	14759	0.104032
GO:1903038	negative regulation of leukocyte cell-cell adhesion	biological_process	8	Wnk1	1	179	9	14759	0.104032
GO:0045923	positive regulation of fatty acid metabolic process	biological_process	9	Adipoq	1	179	9	14759	0.104032
GO:0014009	glial cell proliferation	biological_process	4	Penk	1	179	9	14759	0.104032
GO:0006596	polyamine biosynthetic process	biological_process	10	Azin1	1	179	9	14759	0.104032
GO:0000506	glycosylphosphatidylinositol-N-acetylglucosaminyltransferase (GPI-GnT) complex	cellular_component	7	Pigc	1	179	9	14759	0.104032
GO:2000809	positive regulation of synaptic vesicle clustering	biological_process	7	Cdh2	1	179	9	14759	0.104032
GO:0050665	hydrogen peroxide biosynthetic process	biological_process	8	Cyp1a1	1	179	9	14759	0.104032
GO:0016584	nucleosome positioning	biological_process	8	Smarca5	1	179	9	14759	0.104032
GO:0005677	chromatin silencing complex	cellular_component	6	Smarca5	1	179	9	14759	0.104032
GO:0060290	transdifferentiation	biological_process	6	Mef2c	1	179	9	14759	0.104032
GO:0009744	response to sucrose	biological_process	8	Adipoq	1	179	9	14759	0.104032
GO:0014033	neural crest cell differentiation	biological_process	7	Mef2c	1	179	9	14759	0.104032
GO:0009635	response to herbicide	biological_process	5	Cyp1a1	1	179	9	14759	0.104032
GO:0070307	lens fiber cell development	biological_process	7	Fgfr3	1	179	9	14759	0.104032
GO:0033292	T-tubule organization	biological_process	6	Myof	1	179	9	14759	0.104032
GO:0009950	dorsal/ventral axis specification	biological_process	6	Mdfi	1	179	9	14759	0.104032
GO:0050650	chondroitin sulfate proteoglycan biosynthetic process	biological_process	10	Cytl1	1	179	9	14759	0.104032
GO:0019871	sodium channel inhibitor activity	molecular_function	7	Nedd4	1	179	9	14759	0.104032
GO:0031581	hemidesmosome assembly	biological_process	8	Itgb4	1	179	9	14759	0.104032
GO:2001236	regulation of extrinsic apoptotic signaling pathway	biological_process	9	Ptprc	1	179	9	14759	0.104032
GO:0031995	insulin-like growth factor II binding	molecular_function	7	Igf2r	1	179	9	14759	0.104032
GO:0051683	establishment of Golgi localization	biological_process	7	Ripor1	1	179	9	14759	0.104032
GO:0002467	germinal center formation	biological_process	7	Mef2c	1	179	9	14759	0.104032
GO:0005737	cytoplasm	cellular_component	5	AABR07007032;Abcf1;Actn1;Anks1a;Arfgap1;Arhgef7;Bid;Birc2;Blm;Btbd10;C12H7orf61;Calb2;Camsap2;Cdh2;Cops7a;Cttn;Cyp1a1;Dag1;Dcaf8;Dnm1l;Dnmt3a;Dync1h1;Dync1li2;Egln2;Eif3j;Eif4ebp3;Enah;Fam20b;Fgfr1op;Fgfr3;Fhod3;Flii;Ggps1;Golga4;Gtf2i;Hnrnpu;Hps5;Ilf3;Irak3;Kif5a;Klc2;Klhl25;Map2;Mef2c;Mpp5;Msi1;Mycbp;Nedd4;Nlrp1a;Parp9;Pea15;Phactr4;Pml;Rab28;Rgs3;Ripor1;Ror2;Rps6ka5;S1pr3;Shq1;Slc22a5;Spag9;Sp…	74	179	5396	14759	0.104834
GO:0006635	fatty acid beta-oxidation	biological_process	11	Adipoq;Crot	2	179	46	14759	0.107144
GO:0030833	regulation of actin filament polymerization	biological_process	8	Cttn;Gba2	2	179	46	14759	0.107144
GO:0032456	endocytic recycling	biological_process	8	Dennd1a;RGD1307100	2	179	46	14759	0.107144
GO:0050853	B cell receptor signaling pathway	biological_process	8	Mef2c;Ptprc	2	179	46	14759	0.107144
GO:0050714	positive regulation of protein secretion	biological_process	10	Atp13a2;Dnm1l	2	179	46	14759	0.107144
GO:0035690	cellular response to drug	biological_process	6	Adipoq;Blm;Mef2c	3	179	95	14759	0.108637
GO:0010467	gene expression	biological_process	6	Adipoq;Mpp5	2	179	47	14759	0.11105
GO:0043407	negative regulation of MAP kinase activity	biological_process	12	Adipoq;Irak3	2	179	47	14759	0.11105
GO:0019899	enzyme binding	molecular_function	5	Brd4;Cdh2;Cyp1a1;Igf2r;Nlrp1a;Parp9;Tep1;Top2a	8	179	399	14759	0.112922
GO:0000226	microtubule cytoskeleton organization	biological_process	7	Camsap2;Dock7;Dync1li2;Map2	4	179	152	14759	0.113623
GO:0000775	chromosome, centromeric region	cellular_component	7	Dnmt3a;Hnrnpu;Top2a	3	179	97	14759	0.113775
GO:0045120	pronucleus	cellular_component	7	Blm	1	179	10	14759	0.114905
GO:0009967	positive regulation of signal transduction	biological_process	8	Adipoq	1	179	10	14759	0.114905
GO:1902916	positive regulation of protein polyubiquitination	biological_process	12	Birc2	1	179	10	14759	0.114905
GO:0071374	cellular response to parathyroid hormone stimulus	biological_process	7	Mef2c	1	179	10	14759	0.114905
GO:0000791	euchromatin	cellular_component	7	Dnmt3a	1	179	10	14759	0.114905
GO:1900227	positive regulation of NLRP3 inflammasome complex assembly	biological_process	8	Tlr6	1	179	10	14759	0.114905
GO:0048643	positive regulation of skeletal muscle tissue development	biological_process	10	Mef2c	1	179	10	14759	0.114905
GO:0032494	response to peptidoglycan	biological_process	7	Irak3	1	179	10	14759	0.114905
GO:0071474	cellular hyperosmotic response	biological_process	7	Rcsd1	1	179	10	14759	0.114905
GO:1990404	protein ADP-ribosylase activity	molecular_function	7	Parp9	1	179	10	14759	0.114905
GO:0033129	positive regulation of histone phosphorylation	biological_process	11	Rps6ka5	1	179	10	14759	0.114905
GO:0045762	positive regulation of adenylate cyclase activity	biological_process	8	Stim1	1	179	10	14759	0.114905
GO:1903288	positive regulation of potassium ion import across plasma membrane	biological_process	12	Wnk1	1	179	10	14759	0.114905
GO:0010745	negative regulation of macrophage derived foam cell differentiation	biological_process	8	Adipoq	1	179	10	14759	0.114905
GO:0034046	poly(G) binding	molecular_function	9	Hnrnpu	1	179	10	14759	0.114905
GO:0018022	peptidyl-lysine methylation	biological_process	11	Atpsckmt	1	179	10	14759	0.114905
GO:0035631	CD40 receptor complex	cellular_component	6	Birc2	1	179	10	14759	0.114905
GO:0010642	negative regulation of platelet-derived growth factor receptor signaling pathway	biological_process	9	Adipoq	1	179	10	14759	0.114905
GO:0048703	embryonic viscerocranium morphogenesis	biological_process	6	Mef2c	1	179	10	14759	0.114905
GO:0008024	cyclin/CDK positive transcription elongation factor complex	cellular_component	5	Brd4	1	179	10	14759	0.114905
GO:1902275	regulation of chromatin organization	biological_process	9	Hnrnpu	1	179	10	14759	0.114905
GO:0036449	microtubule minus-end	cellular_component	7	Camsap2	1	179	10	14759	0.114905
GO:0048539	bone marrow development	biological_process	6	Ptprc	1	179	10	14759	0.114905
GO:0098885	modification of postsynaptic actin cytoskeleton	biological_process	8	Cttn	1	179	10	14759	0.114905
GO:0034383	low-density lipoprotein particle clearance	biological_process	5	Adipoq	1	179	10	14759	0.114905
GO:0048048	embryonic eye morphogenesis	biological_process	7	Efemp1	1	179	10	14759	0.114905
GO:0050707	regulation of cytokine secretion	biological_process	7	Tlr6	1	179	10	14759	0.114905
GO:0043219	lateral loop	cellular_component	4	Mpp5	1	179	10	14759	0.114905
GO:0000733	DNA strand renaturation	biological_process	8	Blm	1	179	10	14759	0.114905
GO:0097433	dense body	cellular_component	6	Actn1	1	179	10	14759	0.114905
GO:0060563	neuroepithelial cell differentiation	biological_process	8	Cdh2	1	179	10	14759	0.114905
GO:0042118	endothelial cell activation	biological_process	5	Apold1	1	179	10	14759	0.114905
GO:0000083	regulation of transcription involved in G1/S transition of mitotic cell cycle	biological_process	9	Brd4	1	179	10	14759	0.114905
GO:0070244	negative regulation of thymocyte apoptotic process	biological_process	13	Blm	1	179	10	14759	0.114905
GO:0035357	peroxisome proliferator activated receptor signaling pathway	biological_process	6	Pdk3	1	179	10	14759	0.114905
GO:0048864	stem cell development	biological_process	6	Ptprc	1	179	10	14759	0.114905
GO:0090150	establishment of protein localization to membrane	biological_process	7	Bid	1	179	10	14759	0.114905
GO:0032206	positive regulation of telomere maintenance	biological_process	10	Pml	1	179	10	14759	0.114905
GO:0060998	regulation of dendritic spine development	biological_process	12	Mef2c	1	179	10	14759	0.114905
GO:0001755	neural crest cell migration	biological_process	8	Phactr4;Sema4c	2	179	48	14759	0.114993
GO:0003151	outflow tract morphogenesis	biological_process	5	Mef2c;Nedd4	2	179	48	14759	0.114993
GO:0048704	embryonic skeletal system morphogenesis	biological_process	7	Mdfi;Mef2c	2	179	48	14759	0.114993
GO:0030133	transport vesicle	cellular_component	7	Atp13a2;Fgfr3	2	179	48	14759	0.114993
GO:0006511	ubiquitin-dependent protein catabolic process	biological_process	10	Cul1;Klhl25;Nedd4;Usp24;Usp47	6	179	274	14759	0.116743
GO:0120163	negative regulation of cold-induced thermogenesis	biological_process	7	Adipoq;Dock7	2	179	49	14759	0.118972
GO:0031146	SCF-dependent proteasomal ubiquitin-dependent protein catabolic process	biological_process	12	Cul1;Fbxl3	2	179	49	14759	0.118972
GO:0007626	locomotory behavior	biological_process	4	Penk;Slc22a5;Zfp385a	3	179	99	14759	0.119004
GO:0005506	iron ion binding	molecular_function	8	Cyp1a1;Egln2;P4ha2	4	179	155	14759	0.119704
GO:0006915	apoptotic process	biological_process	6	Bid;Birc2;Cul1;Mef2c;Ogt;Pea15;Pml;Zfp385a	8	179	405	14759	0.120099
GO:0005794	Golgi apparatus	cellular_component	6	Arfgap1;Camsap2;Chpt1;Dnm1l;Dse;Fam20b;Fgfr3;Gba2;Golga4;Igf2r;Kif1c;Mpp5;Ripor1;Serinc5;St6gal1;Tbc1d14;Tbc1d5;Tlr6	18	179	1105	14759	0.122909
GO:0042531	positive regulation of tyrosine phosphorylation of STAT protein	biological_process	11	Fgfr3;Parp9	2	179	50	14759	0.122985
GO:0007266	Rho protein signal transduction	biological_process	8	Phactr4;Ripor1	2	179	50	14759	0.122985
GO:0006895	Golgi to endosome transport	biological_process	9	Kif16b	1	179	11	14759	0.125647
GO:0017069	snRNA binding	molecular_function	7	Hnrnpu	1	179	11	14759	0.125647
GO:0000338	protein deneddylation	biological_process	9	Cops7a	1	179	11	14759	0.125647
GO:0038036	sphingosine-1-phosphate receptor activity	molecular_function	8	S1pr3	1	179	11	14759	0.125647
GO:0098696	regulation of neurotransmitter receptor localization to postsynaptic specialization membrane	biological_process	5	Dag1	1	179	11	14759	0.125647
GO:0010739	positive regulation of protein kinase A signaling	biological_process	10	Adipoq	1	179	11	14759	0.125647
GO:0004659	prenyltransferase activity	molecular_function	6	Ggps1	1	179	11	14759	0.125647
GO:0000276	mitochondrial proton-transporting ATP synthase complex, coupling factor F(o	cellular_component	7	Atp5mc2	1	179	11	14759	0.125647
GO:2000651	positive regulation of sodium ion transmembrane transporter activity	biological_process	8	Wnk1	1	179	11	14759	0.125647
GO:0048312	intracellular distribution of mitochondria	biological_process	8	Dnm1l	1	179	11	14759	0.125647
GO:0045839	negative regulation of mitotic nuclear division	biological_process	9	Fgfr3	1	179	11	14759	0.125647
GO:0034703	cation channel complex	cellular_component	7	Atp5mc2	1	179	11	14759	0.125647
GO:1990357	terminal web	cellular_component	9	Actn1	1	179	11	14759	0.125647
GO:0035563	positive regulation of chromatin binding	biological_process	7	Parp9	1	179	11	14759	0.125647
GO:0055003	cardiac myofibril assembly	biological_process	8	Fhod3	1	179	11	14759	0.125647
GO:0016528	sarcoplasm	cellular_component	6	Mef2c	1	179	11	14759	0.125647
GO:0015279	store-operated calcium channel activity	molecular_function	9	Stim1	1	179	11	14759	0.125647
GO:0042775	mitochondrial ATP synthesis coupled electron transport	biological_process	9	Bid	1	179	11	14759	0.125647
GO:0019870	potassium channel inhibitor activity	molecular_function	7	Wnk1	1	179	11	14759	0.125647
GO:0000813	ESCRT I complex	cellular_component	5	Vps37c	1	179	11	14759	0.125647
GO:0071933	Arp2/3 complex binding	molecular_function	5	Cttn	1	179	11	14759	0.125647
GO:0008206	bile acid metabolic process	biological_process	7	Gba2	1	179	11	14759	0.125647
GO:0070852	cell body fiber	cellular_component	6	Penk	1	179	11	14759	0.125647
GO:0010820	positive regulation of T cell chemotaxis	biological_process	10	Wnk1	1	179	11	14759	0.125647
GO:0005641	nuclear envelope lumen	cellular_component	6	Igf2r	1	179	11	14759	0.125647
GO:0008190	eukaryotic initiation factor 4E binding	molecular_function	6	Eif4ebp3	1	179	11	14759	0.125647
GO:0045295	gamma-catenin binding	molecular_function	5	Cdh2	1	179	11	14759	0.125647
GO:1904468	negative regulation of tumor necrosis factor secretion	biological_process	10	Tlr6	1	179	11	14759	0.125647
GO:1900244	positive regulation of synaptic vesicle endocytosis	biological_process	9	Dnm1l	1	179	11	14759	0.125647
GO:0071679	commissural neuron axon guidance	biological_process	7	Dag1	1	179	11	14759	0.125647
GO:0030056	hemidesmosome	cellular_component	5	Itgb4	1	179	11	14759	0.125647
GO:0030291	protein serine/threonine kinase inhibitor activity	molecular_function	8	Wnk1	1	179	11	14759	0.125647
GO:0005078	MAP-kinase scaffold activity	molecular_function	7	Spag9	1	179	11	14759	0.125647
GO:0008088	axo-dendritic transport	biological_process	9	Klc2	1	179	11	14759	0.125647
GO:0033180	proton-transporting V-type ATPase, V1 domain	cellular_component	6	Atp6v1a	1	179	11	14759	0.125647
GO:0034340	response to type I interferon	biological_process	7	Mx2	1	179	11	14759	0.125647
GO:0001843	neural tube closure	biological_process	7	Enah;Phactr4;Sema4c	3	179	102	14759	0.127012
GO:0120162	positive regulation of cold-induced thermogenesis	biological_process	7	Adipoq;Dync1h1;Ogt	3	179	102	14759	0.127012
GO:0002062	chondrocyte differentiation	biological_process	6	Cytl1;Mef2c	2	179	51	14759	0.12703
GO:0043473	pigmentation	biological_process	3	Dock7;Hps5	2	179	51	14759	0.12703
GO:0003727	single-stranded RNA binding	molecular_function	7	Hnrnpu;Msi1	2	179	51	14759	0.12703
GO:0032720	negative regulation of tumor necrosis factor production	biological_process	9	Adipoq;Irak3	2	179	52	14759	0.131107
GO:0050731	positive regulation of peptidyl-tyrosine phosphorylation	biological_process	11	Adipoq;Fgfr3;Ptprc	3	179	104	14759	0.132455
GO:0007169	transmembrane receptor protein tyrosine kinase signaling pathway	biological_process	7	Epha5;Fgfr3;Ror2	3	179	104	14759	0.132455
GO:0042383	sarcolemma	cellular_component	5	Actn1;Cdh2;Dag1	3	179	104	14759	0.132455
GO:0033674	positive regulation of kinase activity	biological_process	11	Fgfr3;Ror2	2	179	53	14759	0.135213
GO:0045263	proton-transporting ATP synthase complex, coupling factor F(o	cellular_component	6	Atp5mc2	1	179	12	14759	0.13626
GO:1900180	regulation of protein localization to nucleus	biological_process	8	Atp13a2	1	179	12	14759	0.13626
GO:0045651	positive regulation of macrophage differentiation	biological_process	10	Ror2	1	179	12	14759	0.13626
GO:0035020	regulation of Rac protein signal transduction	biological_process	11	Ogt	1	179	12	14759	0.13626
GO:0050764	regulation of phagocytosis	biological_process	7	Ptprc	1	179	12	14759	0.13626
GO:0032183	SUMO binding	molecular_function	6	Pml	1	179	12	14759	0.13626
GO:0055013	cardiac muscle cell development	biological_process	8	Hnrnpu	1	179	12	14759	0.13626
GO:0046850	regulation of bone remodeling	biological_process	7	Fgfr3	1	179	12	14759	0.13626
GO:0030259	lipid glycosylation	biological_process	8	Gba2	1	179	12	14759	0.13626
GO:0033290	eukaryotic 48S preinitiation complex	cellular_component	7	Eif3j	1	179	12	14759	0.13626
GO:0016322	neuron remodeling	biological_process	7	Anks1a	1	179	12	14759	0.13626
GO:0033962	cytoplasmic mRNA processing body assembly	biological_process	9	Dync1h1	1	179	12	14759	0.13626
GO:0002260	lymphocyte homeostasis	biological_process	5	Spns2	1	179	12	14759	0.13626
GO:0008494	translation activator activity	molecular_function	7	Abcf1	1	179	12	14759	0.13626
GO:0031994	insulin-like growth factor I binding	molecular_function	7	Itgb4	1	179	12	14759	0.13626
GO:0050801	ion homeostasis	biological_process	7	Wnk1	1	179	12	14759	0.13626
GO:0043203	axon hillock	cellular_component	6	Map2	1	179	12	14759	0.13626
GO:0048009	insulin-like growth factor receptor signaling pathway	biological_process	8	Igf2r	1	179	12	14759	0.13626
GO:0043984	histone H4-K16 acetylation	biological_process	12	Ogt	1	179	12	14759	0.13626
GO:0030061	mitochondrial crista	cellular_component	5	Atpsckmt	1	179	12	14759	0.13626
GO:0032414	positive regulation of ion transmembrane transporter activity	biological_process	7	Wnk1	1	179	12	14759	0.13626
GO:0046425	regulation of receptor signaling pathway via JAK-STAT	biological_process	9	Ptprc	1	179	12	14759	0.13626
GO:0032495	response to muramyl dipeptide	biological_process	6	Nlrp1a	1	179	12	14759	0.13626
GO:0006091	generation of precursor metabolites and energy	biological_process	5	Crot	1	179	12	14759	0.13626
GO:0044154	histone H3-K14 acetylation	biological_process	12	Brd4	1	179	12	14759	0.13626
GO:0034587	piRNA metabolic process	biological_process	10	Tdrkh	1	179	12	14759	0.13626
GO:0090162	establishment of epithelial cell polarity	biological_process	6	Mpp5	1	179	12	14759	0.13626
GO:0044342	type B pancreatic cell proliferation	biological_process	5	Btbd10	1	179	12	14759	0.13626
GO:0035770	ribonucleoprotein granule	cellular_component	6	Grsf1	1	179	12	14759	0.13626
GO:1904058	positive regulation of sensory perception of pain	biological_process	9	Atpsckmt	1	179	12	14759	0.13626
GO:0010717	regulation of epithelial to mesenchymal transition	biological_process	7	Dag1	1	179	12	14759	0.13626
GO:0044754	autolysosome	cellular_component	10	Ncoa4	1	179	12	14759	0.13626
GO:0071872	cellular response to epinephrine stimulus	biological_process	9	Adipoq	1	179	12	14759	0.13626
GO:0009048	dosage compensation by inactivation of X chromosome	biological_process	10	Hnrnpu	1	179	12	14759	0.13626
GO:0045824	negative regulation of innate immune response	biological_process	8	Irak3	1	179	12	14759	0.13626
GO:0006656	phosphatidylcholine biosynthetic process	biological_process	10	Chpt1	1	179	12	14759	0.13626
GO:0044237	cellular metabolic process	biological_process	4	Blm	1	179	12	14759	0.13626
GO:0030948	negative regulation of vascular endothelial growth factor receptor signaling pathway	biological_process	9	Nedd4	1	179	12	14759	0.13626
GO:0010470	regulation of gastrulation	biological_process	7	Dag1	1	179	12	14759	0.13626
GO:0043653	mitochondrial fragmentation involved in apoptotic process	biological_process	8	Dnm1l	1	179	12	14759	0.13626
GO:0046632	alpha-beta T cell differentiation	biological_process	9	Blm	1	179	12	14759	0.13626
GO:0009404	toxin metabolic process	biological_process	5	Cyp1a1	1	179	12	14759	0.13626
GO:0008276	protein methyltransferase activity	molecular_function	7	Fam98a	1	179	12	14759	0.13626
GO:0016331	morphogenesis of embryonic epithelium	biological_process	7	Grsf1	1	179	12	14759	0.13626
GO:0000287	magnesium ion binding	molecular_function	7	Irak3;Mast3;Rps6ka5;Top2a;Wnk1	5	179	226	14759	0.140584
GO:1990904	ribonucleoprotein complex	cellular_component	4	Grsf1;Hnrnpu;Ilf3;Top2a	4	179	165	14759	0.140948
GO:0004386	helicase activity	molecular_function	9	Blm;Dhx15;Smarca5	3	179	108	14759	0.143579
GO:0004672	protein kinase activity	molecular_function	7	Cask;Dyrk1b;Epha5;Fgfr3;Irak3;Mast3;Pdk3;Ror2;Rps6ka5;Wnk1	10	179	560	14759	0.143633
GO:0007411	axon guidance	biological_process	6	Dag1;Enah;Epha5;Sema4c	4	179	167	14759	0.145367
GO:0006268	DNA unwinding involved in DNA replication	biological_process	10	Blm	1	179	13	14759	0.146744
GO:1903543	positive regulation of exosomal secretion	biological_process	7	Atp13a2	1	179	13	14759	0.146744
GO:1902043	positive regulation of extrinsic apoptotic signaling pathway via death domain receptors	biological_process	11	Pea15	1	179	13	14759	0.146744
GO:0006110	regulation of glycolytic process	biological_process	10	Ogt	1	179	13	14759	0.146744
GO:0006623	protein targeting to vacuole	biological_process	12	Vps37c	1	179	13	14759	0.146744
GO:0022027	interkinetic nuclear migration	biological_process	8	Dock7	1	179	13	14759	0.146744
GO:0045060	negative thymic T cell selection	biological_process	6	Ptprc	1	179	13	14759	0.146744
GO:0061462	protein localization to lysosome	biological_process	9	Atp13a2	1	179	13	14759	0.146744
GO:0010918	positive regulation of mitochondrial membrane potential	biological_process	7	Bid	1	179	13	14759	0.146744
GO:0060445	branching involved in salivary gland morphogenesis	biological_process	7	Dag1	1	179	13	14759	0.146744
GO:0006977	DNA damage response, signal transduction by p53 class mediator resulting in cell cycle arrest	biological_process	9	Pml	1	179	13	14759	0.146744
GO:0019869	chloride channel inhibitor activity	molecular_function	7	Wnk1	1	179	13	14759	0.146744
GO:0048333	mesodermal cell differentiation	biological_process	6	Itgb4	1	179	13	14759	0.146744
GO:0045333	cellular respiration	biological_process	7	Slc25a25	1	179	13	14759	0.146744
GO:0070365	hepatocyte differentiation	biological_process	7	Cyp1a1	1	179	13	14759	0.146744
GO:0048608	reproductive structure development	biological_process	5	Slc22a5	1	179	13	14759	0.146744
GO:2000785	regulation of autophagosome assembly	biological_process	10	Tbc1d14	1	179	13	14759	0.146744
GO:0014044	Schwann cell development	biological_process	7	Dag1	1	179	13	14759	0.146744
GO:0044794	positive regulation by host of viral process	biological_process	8	Igf2r	1	179	13	14759	0.146744
GO:0032541	cortical endoplasmic reticulum	cellular_component	7	Stim1	1	179	13	14759	0.146744
GO:0098974	postsynaptic actin cytoskeleton organization	biological_process	8	Arhgef7	1	179	13	14759	0.146744
GO:0005915	zonula adherens	cellular_component	6	Actn1	1	179	13	14759	0.146744
GO:0046888	negative regulation of hormone secretion	biological_process	8	Adipoq	1	179	13	14759	0.146744
GO:0051014	actin filament severing	biological_process	5	Flii	1	179	13	14759	0.146744
GO:2001034	positive regulation of double-strand break repair via nonhomologous end joining	biological_process	12	Parp9	1	179	13	14759	0.146744
GO:0043596	nuclear replication fork	cellular_component	7	Smarca5	1	179	13	14759	0.146744
GO:0001732	formation of cytoplasmic translation initiation complex	biological_process	9	Eif3j	1	179	13	14759	0.146744
GO:0048484	enteric nervous system development	biological_process	6	Phactr4	1	179	13	14759	0.146744
GO:0030665	clathrin-coated vesicle membrane	cellular_component	8	Dennd1a	1	179	13	14759	0.146744
GO:0005513	detection of calcium ion	biological_process	6	Stim1	1	179	13	14759	0.146744
GO:2000727	positive regulation of cardiac muscle cell differentiation	biological_process	10	Mef2c	1	179	13	14759	0.146744
GO:0090650	cellular response to oxygen-glucose deprivation	biological_process	8	Dnm1l	1	179	13	14759	0.146744
GO:0048304	positive regulation of isotype switching to IgG isotypes	biological_process	11	Ptprc	1	179	13	14759	0.146744
GO:1902166	negative regulation of intrinsic apoptotic signaling pathway in response to DNA damage by p53 class mediator	biological_process	10	Zfp385a	1	179	13	14759	0.146744
GO:0043589	skin morphogenesis	biological_process	6	Itgb4	1	179	13	14759	0.146744
GO:0035067	negative regulation of histone acetylation	biological_process	11	Noc2l	1	179	13	14759	0.146744
GO:0001775	cell activation	biological_process	4	Tlr6	1	179	13	14759	0.146744
GO:0034244	negative regulation of transcription elongation from RNA polymerase II promoter	biological_process	11	Hnrnpu	1	179	13	14759	0.146744
GO:0006071	glycerol metabolic process	biological_process	8	Myof	1	179	13	14759	0.146744
GO:0006886	intracellular protein transport	biological_process	10	Cltb;Cttn;Kif13a;Rab28;Rab5b;Tbc1d5	6	179	295	14759	0.149664
GO:0006468	protein phosphorylation	biological_process	9	Brd4;Cask;Dyrk1b;Epha5;Fgfr3;Ilf3;Irak3;Mast3;Ror2;Rps6ka5;Wnk1	11	179	637	14759	0.151879
GO:0043161	proteasome-mediated ubiquitin-dependent protein catabolic process	biological_process	11	Birc2;Cul1;Fbxl3;Pml	4	179	171	14759	0.154367
GO:0031532	actin cytoskeleton reorganization	biological_process	8	Cttn;Sptan1	2	179	58	14759	0.156149
GO:0018105	peptidyl-serine phosphorylation	biological_process	10	Dyrk1b;Mast3;Pdk3;Wnk1	4	179	172	14759	0.156649
GO:0043981	histone H4-K5 acetylation	biological_process	12	Ogt	1	179	14	14759	0.157101
GO:0060124	positive regulation of growth hormone secretion	biological_process	11	Arhgef7	1	179	14	14759	0.157101
GO:0045670	regulation of osteoclast differentiation	biological_process	9	Fgfr3	1	179	14	14759	0.157101
GO:0005865	striated muscle thin filament	cellular_component	6	Fhod3	1	179	14	14759	0.157101
GO:0043982	histone H4-K8 acetylation	biological_process	12	Ogt	1	179	14	14759	0.157101
GO:0045059	positive thymic T cell selection	biological_process	6	Ptprc	1	179	14	14759	0.157101
GO:0045588	positive regulation of gamma-delta T cell differentiation	biological_process	11	Ptprc	1	179	14	14759	0.157101
GO:0048011	neurotrophin TRK receptor signaling pathway	biological_process	8	Hap1	1	179	14	14759	0.157101
GO:0050805	negative regulation of synaptic transmission	biological_process	8	Adipoq	1	179	14	14759	0.157101
GO:0051974	negative regulation of telomerase activity	biological_process	8	Pml	1	179	14	14759	0.157101
GO:0032801	receptor catabolic process	biological_process	7	Kif16b	1	179	14	14759	0.157101
GO:0016282	eukaryotic 43S preinitiation complex	cellular_component	7	Eif3j	1	179	14	14759	0.157101
GO:0098993	anchored component of synaptic vesicle membrane	cellular_component	6	Rab5b	1	179	14	14759	0.157101
GO:0005003	ephrin receptor activity	molecular_function	10	Epha5	1	179	14	14759	0.157101
GO:0005852	eukaryotic translation initiation factor 3 complex	cellular_component	4	Eif3j	1	179	14	14759	0.157101
GO:0003139	secondary heart field specification	biological_process	8	Mef2c	1	179	14	14759	0.157101
GO:0032438	melanosome organization	biological_process	8	Kif13a	1	179	14	14759	0.157101
GO:1904322	cellular response to forskolin	biological_process	7	Epha5	1	179	14	14759	0.157101
GO:0031065	positive regulation of histone deacetylation	biological_process	11	Pml	1	179	14	14759	0.157101
GO:0033268	node of Ranvier	cellular_component	6	Dag1	1	179	14	14759	0.157101
GO:0008574	ATP-dependent microtubule motor activity, plus-end-directed	molecular_function	12	Kif16b	1	179	14	14759	0.157101
GO:1900121	negative regulation of receptor binding	biological_process	8	Adipoq	1	179	14	14759	0.157101
GO:0002925	positive regulation of humoral immune response mediated by circulating immunoglobulin	biological_process	12	Ptprc	1	179	14	14759	0.157101
GO:0006996	organelle organization	biological_process	5	Hps5	1	179	14	14759	0.157101
GO:0071305	cellular response to vitamin D	biological_process	8	Penk	1	179	14	14759	0.157101
GO:0030224	monocyte differentiation	biological_process	8	Mef2c	1	179	14	14759	0.157101
GO:0008631	intrinsic apoptotic signaling pathway in response to oxidative stress	biological_process	7	Pml	1	179	14	14759	0.157101
GO:1901222	regulation of NIK/NF-kappaB signaling	biological_process	9	Birc2	1	179	14	14759	0.157101
GO:0001889	liver development	biological_process	7	Cyp1a1;Igf2r;Slco2b1	3	179	114	14759	0.160817
GO:0071320	cellular response to cAMP	biological_process	9	Adipoq;Penk	2	179	60	14759	0.164689
GO:0006413	translational initiation	biological_process	5	Abcf1;Eif3j	2	179	60	14759	0.164689
GO:1905168	positive regulation of double-strand break repair via homologous recombination	biological_process	11	Blm	1	179	15	14759	0.167334
GO:0010804	negative regulation of tumor necrosis factor-mediated signaling pathway	biological_process	10	Adipoq	1	179	15	14759	0.167334
GO:0046931	pore complex assembly	biological_process	7	Atp5mc2	1	179	15	14759	0.167334
GO:0043162	ubiquitin-dependent protein catabolic process via the multivesicular body sorting pathway	biological_process	11	Vps37c	1	179	15	14759	0.167334
GO:0002021	response to dietary excess	biological_process	7	Slc25a25	1	179	15	14759	0.167334
GO:0001778	plasma membrane repair	biological_process	7	Myof	1	179	15	14759	0.167334
GO:0001972	retinoic acid binding	molecular_function	7	Igf2r	1	179	15	14759	0.167334
GO:0045504	dynein heavy chain binding	molecular_function	5	Dync1li2	1	179	15	14759	0.167334
GO:0016010	dystrophin-associated glycoprotein complex	cellular_component	5	Dag1	1	179	15	14759	0.167334
GO:0045910	negative regulation of DNA recombination	biological_process	10	Blm	1	179	15	14759	0.167334
GO:0007512	adult heart development	biological_process	7	Slc22a5	1	179	15	14759	0.167334
GO:0051959	dynein light intermediate chain binding	molecular_function	5	Dync1h1	1	179	15	14759	0.167334
GO:0071639	positive regulation of monocyte chemotactic protein-1 production	biological_process	9	Adipoq	1	179	15	14759	0.167334
GO:0002089	lens morphogenesis in camera-type eye	biological_process	5	Fgfr3	1	179	15	14759	0.167334
GO:0006626	protein targeting to mitochondrion	biological_process	12	Bid	1	179	15	14759	0.167334
GO:0032270	positive regulation of cellular protein metabolic process	biological_process	8	Adipoq	1	179	15	14759	0.167334
GO:1901981	phosphatidylinositol phosphate binding	molecular_function	7	Dennd1a	1	179	15	14759	0.167334
GO:1903428	positive regulation of reactive oxygen species biosynthetic process	biological_process	8	Tlr6	1	179	15	14759	0.167334
GO:1903358	regulation of Golgi organization	biological_process	8	Camsap2	1	179	15	14759	0.167334
GO:0099509	regulation of presynaptic cytosolic calcium ion concentration	biological_process	13	Calb2	1	179	15	14759	0.167334
GO:0061052	negative regulation of cell growth involved in cardiac muscle cell development	biological_process	11	Pi16	1	179	15	14759	0.167334
GO:0048268	clathrin coat assembly	biological_process	8	Cltb	1	179	15	14759	0.167334
GO:0003197	endocardial cushion development	biological_process	7	Nedd4	1	179	15	14759	0.167334
GO:0051481	negative regulation of cytosolic calcium ion concentration	biological_process	13	Gtf2i	1	179	15	14759	0.167334
GO:0043138	3'-5' DNA helicase activity	molecular_function	11	Blm	1	179	15	14759	0.167334
GO:0071287	cellular response to manganese ion	biological_process	8	Atp13a2	1	179	15	14759	0.167334
GO:0006349	regulation of gene expression by genetic imprinting	biological_process	9	Dnmt3a	1	179	15	14759	0.167334
GO:0032331	negative regulation of chondrocyte differentiation	biological_process	8	Efemp1	1	179	15	14759	0.167334
GO:0031461	cullin-RING ubiquitin ligase complex	cellular_component	6	Cul1	1	179	15	14759	0.167334
GO:0043968	histone H2A acetylation	biological_process	11	Epc1	1	179	15	14759	0.167334
GO:0002183	cytoplasmic translational initiation	biological_process	6	Eif3j	1	179	15	14759	0.167334
GO:0046685	response to arsenic-containing substance	biological_process	5	Cyp1a1	1	179	15	14759	0.167334
GO:0033691	sialic acid binding	molecular_function	7	Adipoq	1	179	15	14759	0.167334
GO:0046325	negative regulation of glucose import	biological_process	10	Pea15	1	179	15	14759	0.167334
GO:0099173	postsynapse organization	biological_process	5	Actn1	1	179	15	14759	0.167334
GO:0060707	trophoblast giant cell differentiation	biological_process	6	Mdfi	1	179	15	14759	0.167334
GO:1901673	regulation of mitotic spindle assembly	biological_process	9	Hnrnpu	1	179	16	14759	0.177443
GO:0036002	pre-mRNA binding	molecular_function	7	Hnrnpu	1	179	16	14759	0.177443
GO:0006622	protein targeting to lysosome	biological_process	13	Ncoa4	1	179	16	14759	0.177443
GO:0030166	proteoglycan biosynthetic process	biological_process	9	Fam20b	1	179	16	14759	0.177443
GO:0010761	fibroblast migration	biological_process	8	Pml	1	179	16	14759	0.177443
GO:0036038	MKS complex	cellular_component	4	Tmem216	1	179	16	14759	0.177443
GO:0071711	basement membrane organization	biological_process	7	Dag1	1	179	16	14759	0.177443
GO:0048712	negative regulation of astrocyte differentiation	biological_process	12	Fgfr3	1	179	16	14759	0.177443
GO:0008299	isoprenoid biosynthetic process	biological_process	8	Ggps1	1	179	16	14759	0.177443
GO:0030239	myofibril assembly	biological_process	7	Flii	1	179	16	14759	0.177443
GO:0060071	Wnt signaling pathway, planar cell polarity pathway	biological_process	9	Ror2	1	179	16	14759	0.177443
GO:0030853	negative regulation of granulocyte differentiation	biological_process	10	Adipoq	1	179	16	14759	0.177443
GO:0014894	response to denervation involved in regulation of muscle adaptation	biological_process	7	Dag1	1	179	16	14759	0.177443
GO:0006111	regulation of gluconeogenesis	biological_process	10	Ogt	1	179	16	14759	0.177443
GO:0048667	cell morphogenesis involved in neuron differentiation	biological_process	8	Mef2c	1	179	16	14759	0.177443
GO:0015908	fatty acid transport	biological_process	8	Crot	1	179	16	14759	0.177443
GO:0030539	male genitalia development	biological_process	7	Ror2	1	179	16	14759	0.177443
GO:0033197	response to vitamin E	biological_process	7	Mef2c	1	179	16	14759	0.177443
GO:0032509	endosome transport via multivesicular body sorting pathway	biological_process	8	Vps37c	1	179	16	14759	0.177443
GO:0060444	branching involved in mammary gland duct morphogenesis	biological_process	7	Pml	1	179	16	14759	0.177443
GO:0016485	protein processing	biological_process	8	Ddi2;Ogt	2	179	63	14759	0.177647
GO:0048365	Rac GTPase binding	molecular_function	10	Arhgef7;Dock7	2	179	63	14759	0.177647
GO:0005813	centrosome	cellular_component	7	Camsap2;Dync1h1;Dync1i2;Dync1li2;Fgfr1op;Hap1;Hnrnpu;Kif13a;Serinc5	9	179	520	14759	0.18131
GO:0030139	endocytic vesicle	cellular_component	7	Igf2r;Rab5b	2	179	64	14759	0.182001
GO:0009725	response to hormone	biological_process	5	Ncoa4;Steap2	2	179	64	14759	0.182001
GO:0006914	autophagy	biological_process	6	Atp13a2;Itgb4;Tbc1d5	3	179	122	14759	0.184707
GO:0021549	cerebellum development	biological_process	5	Hap1;Sema4c	2	179	65	14759	0.186372
GO:0003084	positive regulation of systemic arterial blood pressure	biological_process	7	Wnk1	1	179	17	14759	0.18743
GO:2001256	regulation of store-operated calcium entry	biological_process	10	Stim1	1	179	17	14759	0.18743
GO:0008301	DNA binding, bending	molecular_function	7	Top2a	1	179	17	14759	0.18743
GO:0061178	regulation of insulin secretion involved in cellular response to glucose stimulus	biological_process	6	Epha5	1	179	17	14759	0.18743
GO:0070166	enamel mineralization	biological_process	8	Stim1	1	179	17	14759	0.18743
GO:0060546	negative regulation of necroptotic process	biological_process	10	Birc2	1	179	17	14759	0.18743
GO:0043194	axon initial segment	cellular_component	6	Map2	1	179	17	14759	0.18743
GO:0015347	sodium-independent organic anion transmembrane transporter activity	molecular_function	8	Slco2b1	1	179	17	14759	0.18743
GO:0007143	female meiotic nuclear division	biological_process	5	Top2a	1	179	17	14759	0.18743
GO:0051963	regulation of synapse assembly	biological_process	6	Mef2c	1	179	17	14759	0.18743
GO:0000400	four-way junction DNA binding	molecular_function	8	Blm	1	179	17	14759	0.18743
GO:0051016	barbed-end actin filament capping	biological_process	11	Flii	1	179	17	14759	0.18743
GO:0045987	positive regulation of smooth muscle contraction	biological_process	10	Cttn	1	179	17	14759	0.18743
GO:0000800	lateral element	cellular_component	7	Blm	1	179	17	14759	0.18743
GO:0015125	bile acid transmembrane transporter activity	molecular_function	5	Slco2b1	1	179	17	14759	0.18743
GO:0071498	cellular response to fluid shear stress	biological_process	6	Mef2c	1	179	17	14759	0.18743
GO:0016572	histone phosphorylation	biological_process	10	Rps6ka5	1	179	17	14759	0.18743
GO:0080182	histone H3-K4 trimethylation	biological_process	13	Ogt	1	179	17	14759	0.18743
GO:0031103	axon regeneration	biological_process	7	Dag1	1	179	17	14759	0.18743
GO:0016706	2-oxoglutarate-dependent dioxygenase activity	molecular_function	6	Egln2	1	179	17	14759	0.18743
GO:0014002	astrocyte development	biological_process	7	Ror2	1	179	17	14759	0.18743
GO:0008210	estrogen metabolic process	biological_process	7	Cyp1a1	1	179	17	14759	0.18743
GO:0031667	response to nutrient levels	biological_process	6	Adipoq;Dnmt3a;Mef2c	3	179	123	14759	0.187757
GO:0016567	protein ubiquitination	biological_process	11	Cul1;Dcaf8;Fbxl3;Klhl25;Marchf2;Nedd4;Pml;Uhrf2	8	179	455	14759	0.188722
GO:0030335	positive regulation of cell migration	biological_process	8	Fgfr1op;Ripor1;Ror2;Sema4c;Spag9	5	179	253	14759	0.193968
GO:0051693	actin filament capping	biological_process	10	Sptan1	1	179	18	14759	0.197296
GO:0045055	regulated exocytosis	biological_process	8	Steap2	1	179	18	14759	0.197296
GO:0019887	protein kinase regulator activity	molecular_function	6	Ptprc	1	179	18	14759	0.197296
GO:0071004	U2-type prespliceosome	cellular_component	8	Luc7l3	1	179	18	14759	0.197296
GO:0060047	heart contraction	biological_process	7	Dnm1l	1	179	18	14759	0.197296
GO:0051764	actin crosslink formation	biological_process	7	Actn1	1	179	18	14759	0.197296
GO:1903827	regulation of cellular protein localization	biological_process	7	Map2	1	179	18	14759	0.197296
GO:0017144	drug metabolic process	biological_process	5	Cyp1a1	1	179	18	14759	0.197296
GO:0001833	inner cell mass cell proliferation	biological_process	4	Brd4	1	179	18	14759	0.197296
GO:0046626	regulation of insulin receptor signaling pathway	biological_process	8	Ogt	1	179	18	14759	0.197296
GO:0071372	cellular response to follicle-stimulating hormone stimulus	biological_process	8	Epha5	1	179	18	14759	0.197296
GO:0030261	chromosome condensation	biological_process	9	Top2a	1	179	18	14759	0.197296
GO:2000310	regulation of NMDA receptor activity	biological_process	10	Mef2c	1	179	18	14759	0.197296
GO:1902187	negative regulation of viral release from host cell	biological_process	7	Pml	1	179	18	14759	0.197296
GO:0045947	negative regulation of translational initiation	biological_process	11	Eif4ebp3	1	179	18	14759	0.197296
GO:0060236	regulation of mitotic spindle organization	biological_process	8	Dync1h1	1	179	18	14759	0.197296
GO:0015288	porin activity	molecular_function	8	Aspnl1	1	179	18	14759	0.197296
GO:2000045	regulation of G1/S transition of mitotic cell cycle	biological_process	9	Bid	1	179	18	14759	0.197296
GO:0051011	microtubule minus-end binding	molecular_function	8	Camsap2	1	179	18	14759	0.197296
GO:1900029	positive regulation of ruffle assembly	biological_process	10	Fam98a	1	179	18	14759	0.197296
GO:0043034	costamere	cellular_component	5	Dag1	1	179	18	14759	0.197296
GO:0005326	neurotransmitter transmembrane transporter activity	molecular_function	4	Cltb	1	179	18	14759	0.197296
GO:0034122	negative regulation of toll-like receptor signaling pathway	biological_process	7	Irak3	1	179	18	14759	0.197296
GO:0043252	sodium-independent organic anion transport	biological_process	9	Slco2b1	1	179	18	14759	0.197296
GO:0043395	heparan sulfate proteoglycan binding	molecular_function	6	Ptprc	1	179	18	14759	0.197296
GO:0050732	negative regulation of peptidyl-tyrosine phosphorylation	biological_process	11	Ptprc	1	179	18	14759	0.197296
GO:0006376	mRNA splice site selection	biological_process	9	Luc7l3	1	179	18	14759	0.197296
GO:0045814	negative regulation of gene expression, epigenetic	biological_process	9	Epc1	1	179	18	14759	0.197296
GO:0000145	exocyst	cellular_component	7	Exoc2	1	179	18	14759	0.197296
GO:0048839	inner ear development	biological_process	5	Cytl1;Fgfr3	2	179	68	14759	0.199567
GO:0015631	tubulin binding	molecular_function	6	Dag1;Map2	2	179	68	14759	0.199567
GO:0018107	peptidyl-threonine phosphorylation	biological_process	10	Dyrk1b;Wnk1	2	179	68	14759	0.199567
GO:0043235	receptor complex	cellular_component	4	Fgfr3;Itgb4;Ror2;Tlr6	4	179	190	14759	0.199727
GO:0045087	innate immune response	biological_process	5	Eif4ebp3;Nlrp1a;Pml;Serinc5;Tlr6	5	179	257	14759	0.202427
GO:0008234	cysteine-type peptidase activity	molecular_function	7	Usp24;Usp47	3	179	129	14759	0.206325
GO:0014898	cardiac muscle hypertrophy in response to stress	biological_process	6	Mef2c	1	179	19	14759	0.207043
GO:0008514	organic anion transmembrane transporter activity	molecular_function	7	Slco2b1	1	179	19	14759	0.207043
GO:0090336	positive regulation of brown fat cell differentiation	biological_process	9	Hnrnpu	1	179	19	14759	0.207043
GO:0045721	negative regulation of gluconeogenesis	biological_process	11	Adipoq	1	179	19	14759	0.207043
GO:0070577	lysine-acetylated histone binding	molecular_function	6	Brd4	1	179	19	14759	0.207043
GO:0071361	cellular response to ethanol	biological_process	7	Dnmt3a	1	179	19	14759	0.207043
GO:0047496	vesicle transport along microtubule	biological_process	10	Hap1	1	179	19	14759	0.207043
GO:0032695	negative regulation of interleukin-12 production	biological_process	8	Irak3	1	179	19	14759	0.207043
GO:0045663	positive regulation of myoblast differentiation	biological_process	8	Mef2c	1	179	19	14759	0.207043
GO:0043330	response to exogenous dsRNA	biological_process	8	Irak3	1	179	19	14759	0.207043
GO:0001779	natural killer cell differentiation	biological_process	8	Ptprc	1	179	19	14759	0.207043
GO:0097503	sialylation	biological_process	7	St6gal1	1	179	19	14759	0.207043
GO:0019395	fatty acid oxidation	biological_process	10	Adipoq	1	179	19	14759	0.207043
GO:0010875	positive regulation of cholesterol efflux	biological_process	11	Adipoq	1	179	19	14759	0.207043
GO:0098688	parallel fiber to Purkinje cell synapse	cellular_component	5	Calb2	1	179	19	14759	0.207043
GO:0016973	poly(A)+ mRNA export from nucleus	biological_process	12	Poldip3	1	179	19	14759	0.207043
GO:0090141	positive regulation of mitochondrial fission	biological_process	10	Dnm1l	1	179	19	14759	0.207043
GO:2000737	negative regulation of stem cell differentiation	biological_process	8	Hnrnpu	1	179	19	14759	0.207043
GO:0018279	protein N-linked glycosylation via asparagine	biological_process	11	St6gal1	1	179	19	14759	0.207043
GO:1900271	regulation of long-term synaptic potentiation	biological_process	10	Calb2	1	179	19	14759	0.207043
GO:0008353	RNA polymerase II CTD heptapeptide repeat kinase activity	molecular_function	9	Brd4	1	179	19	14759	0.207043
GO:0006446	regulation of translational initiation	biological_process	10	Klhl25	1	179	19	14759	0.207043
GO:0021542	dentate gyrus development	biological_process	5	Mef2c	1	179	19	14759	0.207043
GO:0001046	core promoter sequence-specific DNA binding	molecular_function	9	Nrf1	1	179	19	14759	0.207043
GO:0001916	positive regulation of T cell mediated cytotoxicity	biological_process	8	Ptprc	1	179	19	14759	0.207043
GO:0035269	protein O-linked mannosylation	biological_process	11	Pomgnt2	1	179	19	14759	0.207043
GO:0045860	positive regulation of protein kinase activity	biological_process	11	Adipoq;Dag1	2	179	70	14759	0.208426
GO:0005814	centriole	cellular_component	6	Fgfr1op;Hap1;Top2a	3	179	130	14759	0.20946
GO:0036464	cytoplasmic ribonucleoprotein granule	cellular_component	7	Hnrnpu;Poldip3	2	179	71	14759	0.212871
GO:0045732	positive regulation of protein catabolic process	biological_process	8	Egln2;Nedd4	2	179	71	14759	0.212871
GO:0098982	GABA-ergic synapse	cellular_component	4	Arhgef7;Dag1	2	179	71	14759	0.212871
GO:0061630	ubiquitin protein ligase activity	molecular_function	7	Birc2;Marchf2;Nedd4;Ube2o;Uhrf2	5	179	263	14759	0.215346
GO:0055093	response to hyperoxia	biological_process	5	Cyp1a1	1	179	20	14759	0.216673
GO:0042692	muscle cell differentiation	biological_process	6	Sema4c	1	179	20	14759	0.216673
GO:0048546	digestive tract morphogenesis	biological_process	6	Fgfr3	1	179	20	14759	0.216673
GO:0030516	regulation of axon extension	biological_process	7	Cttn	1	179	20	14759	0.216673
GO:0033270	paranode region of axon	cellular_component	6	Sptan1	1	179	20	14759	0.216673
GO:0001502	cartilage condensation	biological_process	4	Ror2	1	179	20	14759	0.216673
GO:0050765	negative regulation of phagocytosis	biological_process	8	Adipoq	1	179	20	14759	0.216673
GO:0000266	mitochondrial fission	biological_process	7	Dnm1l	1	179	20	14759	0.216673
GO:0070330	aromatase activity	molecular_function	7	Cyp1a1	1	179	20	14759	0.216673
GO:0021675	nerve development	biological_process	5	Dag1	1	179	20	14759	0.216673
GO:0032012	regulation of ARF protein signal transduction	biological_process	11	Arfgap1	1	179	20	14759	0.216673
GO:0048814	regulation of dendrite morphogenesis	biological_process	9	Nedd4	1	179	20	14759	0.216673
GO:0035855	megakaryocyte development	biological_process	7	Zfp385a	1	179	20	14759	0.216673
GO:0032469	endoplasmic reticulum calcium ion homeostasis	biological_process	12	Pml	1	179	20	14759	0.216673
GO:0043220	Schmidt-Lanterman incisure	cellular_component	4	Mpp5	1	179	20	14759	0.216673
GO:2000279	negative regulation of DNA biosynthetic process	biological_process	9	Adipoq	1	179	20	14759	0.216673
GO:0005685	U1 snRNP	cellular_component	8	Luc7l3	1	179	20	14759	0.216673
GO:0016279	protein-lysine N-methyltransferase activity	molecular_function	8	Atpsckmt	1	179	20	14759	0.216673
GO:0035641	locomotory exploration behavior	biological_process	5	Penk	1	179	20	14759	0.216673
GO:0032717	negative regulation of interleukin-8 production	biological_process	8	Tlr6	1	179	20	14759	0.216673
GO:0046982	protein heterodimerization activity	molecular_function	6	Irak3;Mef2c;Pml;Tlr6;Top2a	5	179	264	14759	0.217525
GO:0043065	positive regulation of apoptotic process	biological_process	9	Arhgef7;Bid;Dnm1l;Igf2r;Shq1;Top2a	6	179	334	14759	0.220177
GO:0045944	positive regulation of transcription by RNA polymerase II	biological_process	10	Brd4;Cytl1;Epc1;Hnrnpu;Med13;Mef2c;Meis3;Nrf1;Ogt;Pml;Rps6ka5;Sall2;Smarca5;Tead3;Top2a;Zbtb49;Zfp382	17	179	1141	14759	0.221563
GO:0060348	bone development	biological_process	6	Fgfr3;Spns2	2	179	73	14759	0.221787
GO:0019003	GDP binding	molecular_function	8	Rab28;Rab5b	2	179	73	14759	0.221787
GO:0045892	negative regulation of transcription, DNA-templated	biological_process	9	Adipoq;Epc1;Ilf3;Pml;Rps6ka5;Sall2;Usp47;Zfp382	9	179	550	14759	0.224876
GO:0008266	poly(U) RNA binding	molecular_function	9	Msi1	1	179	21	14759	0.226186
GO:1904754	positive regulation of vascular associated smooth muscle cell migration	biological_process	10	Dock7	1	179	21	14759	0.226186
GO:0031643	positive regulation of myelination	biological_process	7	Dag1	1	179	21	14759	0.226186
GO:0005774	vacuolar membrane	cellular_component	7	Atp6v1a	1	179	21	14759	0.226186
GO:0060441	epithelial tube branching involved in lung morphogenesis	biological_process	7	Dag1	1	179	21	14759	0.226186
GO:0017134	fibroblast growth factor binding	molecular_function	6	Fgfr3	1	179	21	14759	0.226186
GO:0071901	negative regulation of protein serine/threonine kinase activity	biological_process	12	Wnk1	1	179	21	14759	0.226186
GO:0031435	mitogen-activated protein kinase kinase kinase binding	molecular_function	8	Ror2	1	179	21	14759	0.226186
GO:0006306	DNA methylation	biological_process	10	Dnmt3a	1	179	21	14759	0.226186
GO:0043032	positive regulation of macrophage activation	biological_process	8	Tlr6	1	179	21	14759	0.226186
GO:0008307	structural constituent of muscle	molecular_function	4	Dag1	1	179	21	14759	0.226186
GO:0048535	lymph node development	biological_process	7	Spns2	1	179	21	14759	0.226186
GO:0010001	glial cell differentiation	biological_process	6	Cdh2	1	179	21	14759	0.226186
GO:0005537	mannose binding	molecular_function	6	Igf2r	1	179	21	14759	0.226186
GO:0030278	regulation of ossification	biological_process	6	Fgfr3	1	179	21	14759	0.226186
GO:0008143	poly(A) binding	molecular_function	9	Hnrnpu	1	179	21	14759	0.226186
GO:0097150	neuronal stem cell population maintenance	biological_process	5	Cdh2	1	179	21	14759	0.226186
GO:0050773	regulation of dendrite development	biological_process	11	Camsap2	1	179	21	14759	0.226186
GO:0016514	SWI/SNF complex	cellular_component	8	Bicral	1	179	21	14759	0.226186
GO:0007611	learning or memory	biological_process	4	Mef2c;Zfp385a	2	179	74	14759	0.226256
GO:0043085	positive regulation of catalytic activity	biological_process	6	Azin1;Phactr4	2	179	74	14759	0.226256
GO:0016328	lateral plasma membrane	cellular_component	5	Actn1;Sptan1	2	179	75	14759	0.230733
GO:0007050	cell cycle arrest	biological_process	5	Pml;Zbtb49	2	179	76	14759	0.235215
GO:0033017	sarcoplasmic reticulum membrane	cellular_component	6	Stim1	1	179	22	14759	0.235585
GO:0061564	axon development	biological_process	8	Camsap2	1	179	22	14759	0.235585
GO:0006509	membrane protein ectodomain proteolysis	biological_process	9	Dag1	1	179	22	14759	0.235585
GO:0071397	cellular response to cholesterol	biological_process	9	Dag1	1	179	22	14759	0.235585
GO:0022010	central nervous system myelination	biological_process	7	Fgfr3	1	179	22	14759	0.235585
GO:0008373	sialyltransferase activity	molecular_function	6	St6gal1	1	179	22	14759	0.235585
GO:0035584	calcium-mediated signaling using intracellular calcium source	biological_process	8	Ptprc	1	179	22	14759	0.235585
GO:0072583	clathrin-dependent endocytosis	biological_process	9	Cltb	1	179	22	14759	0.235585
GO:0045022	early endosome to late endosome transport	biological_process	8	Kif16b	1	179	22	14759	0.235585
GO:0043409	negative regulation of MAPK cascade	biological_process	11	Dag1	1	179	22	14759	0.235585
GO:0051642	centrosome localization	biological_process	6	Dync1li2	1	179	22	14759	0.235585
GO:0032968	positive regulation of transcription elongation from RNA polymerase II promoter	biological_process	11	Brd4	1	179	22	14759	0.235585
GO:0071280	cellular response to copper ion	biological_process	8	Cyp1a1	1	179	22	14759	0.235585
GO:0090398	cellular senescence	biological_process	6	Pml	1	179	22	14759	0.235585
GO:0031297	replication fork processing	biological_process	9	Blm	1	179	22	14759	0.235585
GO:0035267	NuA4 histone acetyltransferase complex	cellular_component	9	Epc1	1	179	22	14759	0.235585
GO:0070300	phosphatidic acid binding	molecular_function	6	Atp13a2	1	179	22	14759	0.235585
GO:0001964	startle response	biological_process	5	Penk	1	179	22	14759	0.235585
GO:0071837	HMG box domain binding	molecular_function	6	Mef2c	1	179	22	14759	0.235585
GO:0035329	hippo signaling	biological_process	6	Tead3	1	179	22	14759	0.235585
GO:0006959	humoral immune response	biological_process	5	Mef2c	1	179	22	14759	0.235585
GO:0032691	negative regulation of interleukin-1 beta production	biological_process	9	Pml	1	179	22	14759	0.235585
GO:0005520	insulin-like growth factor binding	molecular_function	6	Igf2r	1	179	22	14759	0.235585
GO:0032874	positive regulation of stress-activated MAPK cascade	biological_process	12	Sema4c	1	179	22	14759	0.235585
GO:0014823	response to activity	biological_process	4	Adipoq;Slc25a25	2	179	77	14759	0.239702
GO:0006812	cation transport	biological_process	7	Atp13a2;Stim1	2	179	77	14759	0.239702
GO:0031398	positive regulation of protein ubiquitination	biological_process	11	Birc2;Fgfr3	2	179	77	14759	0.239702
GO:0003730	mRNA 3'-UTR binding	molecular_function	8	Hnrnpu;Zfp385a	2	179	77	14759	0.239702
GO:0050680	negative regulation of epithelial cell proliferation	biological_process	8	Fgfr3;Mef2c	2	179	77	14759	0.239702
GO:0071560	cellular response to transforming growth factor beta stimulus	biological_process	8	Mef2c;Penk	2	179	78	14759	0.244193
GO:0071333	cellular response to glucose stimulus	biological_process	10	Mef2c;Pdk3	2	179	78	14759	0.244193
GO:0008202	steroid metabolic process	biological_process	6	Cyp1a1;Gba2	2	179	78	14759	0.244193
GO:0015711	organic anion transport	biological_process	8	Slco2b1	1	179	23	14759	0.244869
GO:0005921	gap junction	cellular_component	5	Calb2	1	179	23	14759	0.244869
GO:0090316	positive regulation of intracellular protein transport	biological_process	9	Ripor1	1	179	23	14759	0.244869
GO:0061003	positive regulation of dendritic spine morphogenesis	biological_process	11	Dnm1l	1	179	23	14759	0.244869
GO:0005671	Ada2/Gcn5/Ada3 transcription activator complex	cellular_component	8	Ubap2l	1	179	23	14759	0.244869
GO:0048384	retinoic acid receptor signaling pathway	biological_process	6	Pml	1	179	23	14759	0.244869
GO:2000311	regulation of AMPA receptor activity	biological_process	10	Mef2c	1	179	23	14759	0.244869
GO:0030159	receptor signaling complex adaptor activity	molecular_function	7	Spag9	1	179	23	14759	0.244869
GO:0016234	inclusion body	cellular_component	5	Hap1	1	179	23	14759	0.244869
GO:0004190	aspartic-type endopeptidase activity	molecular_function	8	Ddi2	1	179	23	14759	0.244869
GO:0030215	semaphorin receptor binding	molecular_function	6	Sema4c	1	179	23	14759	0.244869
GO:0001673	male germ cell nucleus	cellular_component	8	Blm	1	179	23	14759	0.244869
GO:0009617	response to bacterium	biological_process	7	Adipoq;Penk;Slfn4	3	179	143	14759	0.251066
GO:0045727	positive regulation of translation	biological_process	10	Abcf1;Poldip3	2	179	80	14759	0.253186
GO:0007059	chromosome segregation	biological_process	4	Brd4;Top2a	2	179	80	14759	0.253186
GO:0016327	apicolateral plasma membrane	cellular_component	5	Cdh2	1	179	24	14759	0.254042
GO:0002224	toll-like receptor signaling pathway	biological_process	8	Tlr6	1	179	24	14759	0.254042
GO:0006259	DNA metabolic process	biological_process	7	Top2a	1	179	24	14759	0.254042
GO:0008198	ferrous iron binding	molecular_function	9	Egln2	1	179	24	14759	0.254042
GO:0010608	posttranscriptional regulation of gene expression	biological_process	8	Parp9	1	179	24	14759	0.254042
GO:0070584	mitochondrion morphogenesis	biological_process	7	Dnm1l	1	179	24	14759	0.254042
GO:0051145	smooth muscle cell differentiation	biological_process	7	Mef2c	1	179	24	14759	0.254042
GO:0034364	high-density lipoprotein particle	cellular_component	5	Hps5	1	179	24	14759	0.254042
GO:0000993	RNA polymerase II complex binding	molecular_function	7	Hnrnpu	1	179	24	14759	0.254042
GO:0008157	protein phosphatase 1 binding	molecular_function	8	Phactr4	1	179	24	14759	0.254042
GO:0006471	protein ADP-ribosylation	biological_process	9	Parp9	1	179	24	14759	0.254042
GO:0044389	ubiquitin-like protein ligase binding	molecular_function	6	Parp9	1	179	24	14759	0.254042
GO:0016342	catenin complex	cellular_component	6	Cdh2	1	179	24	14759	0.254042
GO:0060828	regulation of canonical Wnt signaling pathway	biological_process	9	Ror2	1	179	24	14759	0.254042
GO:0090734	site of DNA damage	cellular_component	6	Parp9	1	179	24	14759	0.254042
GO:0035066	positive regulation of histone acetylation	biological_process	11	Rps6ka5	1	179	24	14759	0.254042
GO:0030279	negative regulation of ossification	biological_process	7	Mef2c	1	179	24	14759	0.254042
GO:0046961	proton-transporting ATPase activity, rotational mechanism	molecular_function	10	Atp6v1a	1	179	24	14759	0.254042
GO:0045582	positive regulation of T cell differentiation	biological_process	10	Ptprc	1	179	24	14759	0.254042
GO:0034067	protein localization to Golgi apparatus	biological_process	8	Ripor1	1	179	24	14759	0.254042
GO:0030837	negative regulation of actin filament polymerization	biological_process	9	Fhod3	1	179	24	14759	0.254042
GO:0008305	integrin complex	cellular_component	5	Itgb4	1	179	24	14759	0.254042
GO:0016607	nuclear speck	cellular_component	8	Dhx15;Hnrnpu;Luc7l3;Mef2c;Poldip3;Ylpm1	6	179	353	14759	0.258005
GO:0034599	cellular response to oxidative stress	biological_process	6	Atp13a2;Penk	2	179	82	14759	0.262186
GO:0070373	negative regulation of ERK1 and ERK2 cascade	biological_process	12	Adipoq;Ptprc	2	179	82	14759	0.262186
GO:0010165	response to X-ray	biological_process	7	Blm	1	179	25	14759	0.263104
GO:0010971	positive regulation of G2/M transition of mitotic cell cycle	biological_process	10	Brd4	1	179	25	14759	0.263104
GO:0030904	retromer complex	cellular_component	4	Tbc1d5	1	179	25	14759	0.263104
GO:0031668	cellular response to extracellular stimulus	biological_process	5	Ptprc	1	179	25	14759	0.263104
GO:0003950	NAD+ ADP-ribosyltransferase activity	molecular_function	7	Parp9	1	179	25	14759	0.263104
GO:0071353	cellular response to interleukin-4	biological_process	8	Pml	1	179	25	14759	0.263104
GO:0042273	ribosomal large subunit biogenesis	biological_process	6	Noc2l	1	179	25	14759	0.263104
GO:0032502	developmental process	biological_process	3	Cyp1a1	1	179	25	14759	0.263104
GO:0048747	muscle fiber development	biological_process	8	Myof	1	179	25	14759	0.263104
GO:0048714	positive regulation of oligodendrocyte differentiation	biological_process	12	Dag1	1	179	25	14759	0.263104
GO:0001223	transcription coactivator binding	molecular_function	7	Zbtb49	1	179	25	14759	0.263104
GO:0016773	phosphotransferase activity, alcohol group as acceptor	molecular_function	6	Fam20b	1	179	25	14759	0.263104
GO:0012501	programmed cell death	biological_process	5	Dnm1l	1	179	25	14759	0.263104
GO:0006882	cellular zinc ion homeostasis	biological_process	12	Atp13a2	1	179	25	14759	0.263104
GO:0010613	positive regulation of cardiac muscle hypertrophy	biological_process	10	Mef2c	1	179	25	14759	0.263104
GO:0008643	carbohydrate transport	biological_process	7	Pea15	1	179	25	14759	0.263104
GO:0016339	calcium-dependent cell-cell adhesion via plasma membrane cell adhesion molecules	biological_process	7	Cdh2	1	179	25	14759	0.263104
GO:0072332	intrinsic apoptotic signaling pathway by p53 class mediator	biological_process	7	Pml	1	179	25	14759	0.263104
GO:0019222	regulation of metabolic process	biological_process	5	S1pr3	1	179	25	14759	0.263104
GO:0006869	lipid transport	biological_process	7	Apold1;Spns2	2	179	83	14759	0.266688
GO:0007005	mitochondrion organization	biological_process	6	Dnm1l;Slc22a5	2	179	83	14759	0.266688
GO:0032355	response to estradiol	biological_process	6	Bid;Dnmt3a;Penk	3	179	148	14759	0.267396
GO:0051607	defense response to virus	biological_process	5	Ilf3;Ptprc;Serinc5	3	179	148	14759	0.267396
GO:0005770	late endosome	cellular_component	8	Atp13a2;Dync1li2;Igf2r	3	179	149	14759	0.270678
GO:0016605	PML body	cellular_component	8	Blm;Pml	2	179	84	14759	0.271189
GO:0002028	regulation of sodium ion transport	biological_process	9	Wnk1	1	179	26	14759	0.272056
GO:0000979	RNA polymerase II core promoter sequence-specific DNA binding	molecular_function	10	Nrf1	1	179	26	14759	0.272056
GO:0043044	ATP-dependent chromatin remodeling	biological_process	7	Smarca5	1	179	26	14759	0.272056
GO:1900017	positive regulation of cytokine production involved in inflammatory response	biological_process	8	Tlr6	1	179	26	14759	0.272056
GO:0005657	replication fork	cellular_component	6	Blm	1	179	26	14759	0.272056
GO:0043027	cysteine-type endopeptidase inhibitor activity involved in apoptotic process	molecular_function	9	Birc2	1	179	26	14759	0.272056
GO:0080008	Cul4-RING E3 ubiquitin ligase complex	cellular_component	7	Dcaf8	1	179	26	14759	0.272056
GO:0042157	lipoprotein metabolic process	biological_process	7	Apold1	1	179	26	14759	0.272056
GO:0043403	skeletal muscle tissue regeneration	biological_process	7	Dag1	1	179	26	14759	0.272056
GO:0098586	cellular response to virus	biological_process	8	Penk	1	179	26	14759	0.272056
GO:0060261	positive regulation of transcription initiation from RNA polymerase II promoter	biological_process	11	Med13	1	179	26	14759	0.272056
GO:0006479	protein methylation	biological_process	10	Fam98a	1	179	26	14759	0.272056
GO:0015721	bile acid and bile salt transport	biological_process	8	Slco2b1	1	179	26	14759	0.272056
GO:0004712	protein serine/threonine/tyrosine kinase activity	molecular_function	8	Dyrk1b	1	179	26	14759	0.272056
GO:0036342	post-anal tail morphogenesis	biological_process	5	Fgfr3	1	179	26	14759	0.272056
GO:0009880	embryonic pattern specification	biological_process	5	Meis3	1	179	26	14759	0.272056
GO:0071158	positive regulation of cell cycle arrest	biological_process	9	Uhrf2	1	179	26	14759	0.272056
GO:1900182	positive regulation of protein localization to nucleus	biological_process	9	Parp9	1	179	27	14759	0.2809
GO:0045499	chemorepellent activity	molecular_function	7	Sema4c	1	179	27	14759	0.2809
GO:0071398	cellular response to fatty acid	biological_process	7	Pdk3	1	179	27	14759	0.2809
GO:0022011	myelination in peripheral nervous system	biological_process	7	Dag1	1	179	27	14759	0.2809
GO:0001671	ATPase activator activity	molecular_function	6	Dnajb4	1	179	27	14759	0.2809
GO:0006970	response to osmotic stress	biological_process	5	C12H7orf61	1	179	27	14759	0.2809
GO:0043236	laminin binding	molecular_function	5	Dag1	1	179	27	14759	0.2809
GO:0006352	DNA-templated transcription, initiation	biological_process	8	Smarca5	1	179	27	14759	0.2809
GO:0021537	telencephalon development	biological_process	5	Cdh2	1	179	27	14759	0.2809
GO:0030318	melanocyte differentiation	biological_process	7	Mef2c	1	179	27	14759	0.2809
GO:0045862	positive regulation of proteolysis	biological_process	9	Ogt	1	179	27	14759	0.2809
GO:0046928	regulation of neurotransmitter secretion	biological_process	6	Mef2c	1	179	27	14759	0.2809
GO:0035925	mRNA 3'-UTR AU-rich region binding	molecular_function	9	Ilf3	1	179	27	14759	0.2809
GO:0043537	negative regulation of blood vessel endothelial cell migration	biological_process	11	Mef2c	1	179	27	14759	0.2809
GO:0046966	thyroid hormone receptor binding	molecular_function	8	Med13	1	179	27	14759	0.2809
GO:0017148	negative regulation of translation	biological_process	10	Eif4ebp3;Ilf3	2	179	87	14759	0.284686
GO:0090630	activation of GTPase activity	biological_process	9	Dock7;Tbc1d5	2	179	88	14759	0.289181
GO:0016310	phosphorylation	biological_process	7	Dyrk1b;Fam20b;Fgfr3;Irak3;Mast3;Mpp5;Pdk3;Ror2;Rps6ka5;Wnk1	10	179	666	14759	0.289544
GO:0004864	protein phosphatase inhibitor activity	molecular_function	7	Phactr4	1	179	28	14759	0.289638
GO:0030506	ankyrin binding	molecular_function	6	Ptprc	1	179	28	14759	0.289638
GO:0000123	histone acetyltransferase complex	cellular_component	6	Ogt	1	179	28	14759	0.289638
GO:0051966	regulation of synaptic transmission, glutamatergic	biological_process	9	Mef2c	1	179	28	14759	0.289638
GO:0035024	negative regulation of Rho protein signal transduction	biological_process	12	Ripor1	1	179	28	14759	0.289638
GO:0045879	negative regulation of smoothened signaling pathway	biological_process	9	Fgfr3	1	179	28	14759	0.289638
GO:0043325	phosphatidylinositol-3,4-bisphosphate binding	molecular_function	9	Kif16b	1	179	28	14759	0.289638
GO:0051010	microtubule plus-end binding	molecular_function	8	Stim1	1	179	28	14759	0.289638
GO:0034113	heterotypic cell-cell adhesion	biological_process	6	Ptprc	1	179	28	14759	0.289638
GO:0046930	pore complex	cellular_component	5	Aspnl1	1	179	28	14759	0.289638
GO:0017025	TBP-class protein binding	molecular_function	7	Cand2	1	179	28	14759	0.289638
GO:0071385	cellular response to glucocorticoid stimulus	biological_process	9	Hnrnpu	1	179	28	14759	0.289638
GO:0008395	steroid hydroxylase activity	molecular_function	6	Cyp1a1	1	179	28	14759	0.289638
GO:0032588	trans-Golgi network membrane	cellular_component	8	Kif13a	1	179	28	14759	0.289638
GO:0016525	negative regulation of angiogenesis	biological_process	8	Gtf2i;Pml	2	179	89	14759	0.293673
GO:0007409	axonogenesis	biological_process	9	Dock7;Map2	2	179	89	14759	0.293673
GO:0051092	positive regulation of NF-kappaB transcription factor activity	biological_process	7	Irak3;Rps6ka5;Tlr6	3	179	156	14759	0.293762
GO:0006486	protein glycosylation	biological_process	9	Ogt;Pomgnt2;St6gal1	3	179	156	14759	0.293762
GO:0042803	protein homodimerization activity	molecular_function	6	Actn1;Adipoq;Blm;Dnm1l;Fgfr1op;Irak3;Nrf1;Pml;St6gal1;Top2a	10	179	669	14759	0.294218
GO:0000122	negative regulation of transcription by RNA polymerase II	biological_process	10	Dnmt3a;Epc1;Fgfr3;Hnrnpu;Mdfi;Mef2c;Nedd4;Noc2l;Parp9;Sall2;Zfp382;Zfp496	12	179	822	14759	0.295547
GO:0031175	neuron projection development	biological_process	7	Camsap2;Dock7;Map2	3	179	157	14759	0.297072
GO:0050852	T cell receptor signaling pathway	biological_process	8	Ptprc;Wnk1	2	179	90	14759	0.298161
GO:0051209	release of sequestered calcium ion into cytosol	biological_process	8	Ptprc	1	179	29	14759	0.29827
GO:0048741	skeletal muscle fiber development	biological_process	9	Actn1	1	179	29	14759	0.29827
GO:0048843	negative regulation of axon extension involved in axon guidance	biological_process	9	Sema4c	1	179	29	14759	0.29827
GO:0048255	mRNA stabilization	biological_process	11	Hnrnpu	1	179	29	14759	0.29827
GO:0070371	ERK1 and ERK2 cascade	biological_process	12	Fgfr3	1	179	29	14759	0.29827
GO:0031519	PcG protein complex	cellular_component	4	Ubap2l	1	179	29	14759	0.29827
GO:0090023	positive regulation of neutrophil chemotaxis	biological_process	10	Dnm1l	1	179	29	14759	0.29827
GO:0005347	ATP transmembrane transporter activity	molecular_function	9	Slc25a25	1	179	29	14759	0.29827
GO:0007269	neurotransmitter secretion	biological_process	6	Cltb	1	179	29	14759	0.29827
GO:0030099	myeloid cell differentiation	biological_process	6	Pml	1	179	29	14759	0.29827
GO:0003676	nucleic acid binding	molecular_function	5	Blm;Dhx15;Eif4ebp3;Grsf1;Msi1;Poldip3;Sall2;Sf3b3;Smarca5;Tdrkh;Zbtb49;Zfp382;Zfp385a;Zfp496;Zfp691	15	179	1055	14759	0.298725
GO:0005938	cell cortex	cellular_component	7	Arhgef7;Cttn;Sptan1	3	179	158	14759	0.300384
GO:0051082	unfolded protein binding	molecular_function	5	Dnajb4;Shq1	2	179	91	14759	0.302644
GO:0001649	osteoblast differentiation	biological_process	6	Mef2c;Penk	2	179	91	14759	0.302644
GO:0071277	cellular response to calcium ion	biological_process	8	Mef2c;Wnk1	2	179	91	14759	0.302644
GO:0005509	calcium ion binding	molecular_function	7	Actn1;Aspnl1;Calb2;Cdh2;Dag1;Efemp1;Slc25a25;Sptan1;Stim1	9	179	599	14759	0.303282
GO:0007399	nervous system development	biological_process	6	Arhgef7;Cables1;Mef2c;Ror2;Sema4c	5	179	302	14759	0.304484
GO:0042771	intrinsic apoptotic signaling pathway in response to DNA damage by p53 class mediator	biological_process	8	Pml	1	179	30	14759	0.306797
GO:0015867	ATP transport	biological_process	9	Slc25a25	1	179	30	14759	0.306797
GO:0046875	ephrin receptor binding	molecular_function	6	Anks1a	1	179	30	14759	0.306797
GO:0007254	JNK cascade	biological_process	13	Ror2	1	179	30	14759	0.306797
GO:0007154	cell communication	biological_process	4	Itgb4	1	179	30	14759	0.306797
GO:0010498	proteasomal protein catabolic process	biological_process	8	Ddi2	1	179	30	14759	0.306797
GO:0012506	vesicle membrane	cellular_component	5	Atp13a2	1	179	30	14759	0.306797
GO:0032435	negative regulation of proteasomal ubiquitin-dependent protein catabolic process	biological_process	12	Ogt	1	179	30	14759	0.306797
GO:0001954	positive regulation of cell-matrix adhesion	biological_process	8	Dag1	1	179	30	14759	0.306797
GO:0005246	calcium channel regulator activity	molecular_function	6	Stim1	1	179	30	14759	0.306797
GO:0009615	response to virus	biological_process	7	Cyp1a1;Mx2	2	179	92	14759	0.307123
GO:0071013	catalytic step 2 spliceosome	cellular_component	7	Hnrnpu;Sf3b3	2	179	92	14759	0.307123
GO:0043005	neuron projection	cellular_component	5	Anks1a;Arhgef7;Atp13a2;Calb2;Kif5a;Klc2;Map2	7	179	451	14759	0.307369
GO:0072659	protein localization to plasma membrane	biological_process	8	Adipoq;Cdh2;Mpp5	3	179	161	14759	0.310333
GO:0048511	rhythmic process	biological_process	3	Dnm1l;Ogt	2	179	93	14759	0.311596
GO:0015630	microtubule cytoskeleton	cellular_component	7	Dnm1l;Sptan1;Zbtb49	3	179	162	14759	0.313652
GO:0044877	protein-containing complex binding	molecular_function	4	Birc2;Dnm1l;Hnrnpu;Poldip3;Sall2;Sf3b3;Sptan1;Tbc1d5	8	179	530	14759	0.314633
GO:0030295	protein kinase activator activity	molecular_function	7	Wnk1	1	179	31	14759	0.315222
GO:0035902	response to immobilization stress	biological_process	5	Cyp1a1	1	179	31	14759	0.315222
GO:0048854	brain morphogenesis	biological_process	6	Cdh2	1	179	31	14759	0.315222
GO:0002092	positive regulation of receptor internalization	biological_process	8	Tbc1d5	1	179	31	14759	0.315222
GO:0010288	response to lead ion	biological_process	7	Dnmt3a	1	179	31	14759	0.315222
GO:0007095	mitotic G2 DNA damage checkpoint	biological_process	9	Blm	1	179	31	14759	0.315222
GO:0043392	negative regulation of DNA binding	biological_process	7	Mdfi	1	179	31	14759	0.315222
GO:0001774	microglial cell activation	biological_process	7	Tlr6	1	179	31	14759	0.315222
GO:1900087	positive regulation of G1/S transition of mitotic cell cycle	biological_process	10	Cyp1a1	1	179	31	14759	0.315222
GO:0017147	Wnt-protein binding	molecular_function	5	Ror2	1	179	31	14759	0.315222
GO:1902042	negative regulation of extrinsic apoptotic signaling pathway via death domain receptors	biological_process	11	Pea15	1	179	31	14759	0.315222
GO:0042788	polysomal ribosome	cellular_component	7	Abcf1	1	179	31	14759	0.315222
GO:0004553	hydrolase activity, hydrolyzing O-glycosyl compounds	molecular_function	6	Gba2	1	179	31	14759	0.315222
GO:0042327	positive regulation of phosphorylation	biological_process	10	Btbd10	1	179	31	14759	0.315222
GO:0051019	mitogen-activated protein kinase binding	molecular_function	8	Gtf2i	1	179	31	14759	0.315222
GO:0030517	negative regulation of axon extension	biological_process	8	Map2	1	179	31	14759	0.315222
GO:0060045	positive regulation of cardiac muscle cell proliferation	biological_process	8	Mef2c	1	179	31	14759	0.315222
GO:0006506	GPI anchor biosynthetic process	biological_process	10	Pigc	1	179	31	14759	0.315222
GO:0004860	protein kinase inhibitor activity	molecular_function	7	Wnk1	1	179	31	14759	0.315222
GO:0016192	vesicle-mediated transport	biological_process	6	Arfgap1;Cltb;Kif5a;Spag9	4	179	234	14759	0.315985
GO:0003697	single-stranded DNA binding	molecular_function	7	Blm;Hnrnpu	2	179	94	14759	0.316063
GO:0055007	cardiac muscle cell differentiation	biological_process	7	Mef2c	1	179	32	14759	0.323544
GO:0014003	oligodendrocyte development	biological_process	7	Fgfr3	1	179	32	14759	0.323544
GO:0071889	14-3-3 protein binding	molecular_function	5	Ripor1	1	179	32	14759	0.323544
GO:0001958	endochondral ossification	biological_process	6	Mef2c	1	179	32	14759	0.323544
GO:0043552	positive regulation of phosphatidylinositol 3-kinase activity	biological_process	10	Fgfr3	1	179	32	14759	0.323544
GO:0003009	skeletal muscle contraction	biological_process	8	Rcsd1	1	179	32	14759	0.323544
GO:0006338	chromatin remodeling	biological_process	6	Brd4;Smarca5	2	179	96	14759	0.324978
GO:0004674	protein serine/threonine kinase activity	molecular_function	8	Dyrk1b;Irak3;Mast3;Pdk3;Rps6ka5;Wnk1	6	179	386	14759	0.327223
GO:0000187	activation of MAPK activity	biological_process	13	Ptprc;Spag9	2	179	97	14759	0.329424
GO:0000139	Golgi membrane	cellular_component	7	Arfgap1;Chpt1;Dnm1l;Gba2;Golga4;St6gal1	6	179	388	14759	0.331515
GO:0007159	leukocyte cell-cell adhesion	biological_process	6	Ptprc	1	179	33	14759	0.331766
GO:0008089	anterograde axonal transport	biological_process	11	Hap1	1	179	33	14759	0.331766
GO:2001243	negative regulation of intrinsic apoptotic signaling pathway	biological_process	10	Noc2l	1	179	33	14759	0.331766
GO:0001965	G-protein alpha-subunit binding	molecular_function	5	Igf2r	1	179	33	14759	0.331766
GO:0016712	oxidoreductase activity, acting on paired donors, with incorporation or reduction of molecular oxygen, reduced flavin or flavoprotein as one donor, and incorporation of one atom of oxygen	molecular_function	6	Cyp1a1	1	179	33	14759	0.331766
GO:0050699	WW domain binding	molecular_function	6	Enah	1	179	33	14759	0.331766
GO:0048872	homeostasis of number of cells	biological_process	6	Cdh2	1	179	33	14759	0.331766
GO:0017157	regulation of exocytosis	biological_process	7	Hap1	1	179	33	14759	0.331766
GO:0007492	endoderm development	biological_process	6	Kif16b	1	179	33	14759	0.331766
GO:0015078	proton transmembrane transporter activity	molecular_function	9	Atp5mc2	1	179	33	14759	0.331766
GO:0045776	negative regulation of blood pressure	biological_process	6	Adipoq	1	179	33	14759	0.331766
GO:0004869	cysteine-type endopeptidase inhibitor activity	molecular_function	8	Ube2o	1	179	33	14759	0.331766
GO:0008375	acetylglucosaminyltransferase activity	molecular_function	7	Pomgnt2	1	179	33	14759	0.331766
GO:0042098	T cell proliferation	biological_process	8	Ptprc	1	179	33	14759	0.331766
GO:0030426	growth cone	cellular_component	5	Arhgef7;Cttn;Stim1	3	179	168	14759	0.333578
GO:0030036	actin cytoskeleton organization	biological_process	7	Enah;Flii;Phactr4	3	179	168	14759	0.333578
GO:0071407	cellular response to organic cyclic compound	biological_process	7	Cyp1a1;Mef2c	2	179	98	14759	0.333863
GO:0051087	chaperone binding	molecular_function	5	Birc2;Dnajb4	2	179	98	14759	0.333863
GO:0034451	centriolar satellite	cellular_component	7	Flii;Spag9	2	179	99	14759	0.338293
GO:0035255	ionotropic glutamate receptor binding	molecular_function	7	Nedd4	1	179	34	14759	0.339889
GO:0007140	male meiotic nuclear division	biological_process	5	Tdrkh	1	179	34	14759	0.339889
GO:0002102	podosome	cellular_component	4	Cttn	1	179	34	14759	0.339889
GO:0051085	chaperone cofactor-dependent protein refolding	biological_process	7	Dnajb4	1	179	34	14759	0.339889
GO:0030041	actin filament polymerization	biological_process	8	Cttn	1	179	34	14759	0.339889
GO:0051924	regulation of calcium ion transport	biological_process	9	Stim1	1	179	34	14759	0.339889
GO:0042572	retinol metabolic process	biological_process	11	Cyp1a1	1	179	34	14759	0.339889
GO:0043029	T cell homeostasis	biological_process	6	Spns2	1	179	34	14759	0.339889
GO:0030866	cortical actin cytoskeleton organization	biological_process	8	Fhod3	1	179	34	14759	0.339889
GO:0004857	enzyme inhibitor activity	molecular_function	5	Parp9	1	179	34	14759	0.339889
GO:0043388	positive regulation of DNA binding	biological_process	7	Brd4	1	179	34	14759	0.339889
GO:0005769	early endosome	cellular_component	8	Igf2r;Kif16b;Rab5b;Steap2	4	179	244	14759	0.343482
GO:0006974	cellular response to DNA damage stimulus	biological_process	6	Blm;Brd4;Top2a;Usp47;Zfp385a	6	179	395	14759	0.346589
GO:0006417	regulation of translation	biological_process	9	Eif4ebp3;Klhl25	2	179	101	14759	0.347126
GO:0005154	epidermal growth factor receptor binding	molecular_function	7	Efemp1	1	179	35	14759	0.347913
GO:0043967	histone H4 acetylation	biological_process	11	Epc1	1	179	35	14759	0.347913
GO:0051480	regulation of cytosolic calcium ion concentration	biological_process	12	Calb2	1	179	35	14759	0.347913
GO:0060349	bone morphogenesis	biological_process	6	Fgfr3	1	179	35	14759	0.347913
GO:0071479	cellular response to ionizing radiation	biological_process	7	Blm	1	179	35	14759	0.347913
GO:0042110	T cell activation	biological_process	7	Nedd4	1	179	35	14759	0.347913
GO:0030425	dendrite	cellular_component	6	Calb2;Cttn;Dennd1a;Map2;Penk;Ror2;Zfp385a	7	179	474	14759	0.352456
GO:0006367	transcription initiation from RNA polymerase II promoter	biological_process	9	Med13	1	179	36	14759	0.355841
GO:0070328	triglyceride homeostasis	biological_process	9	Med13	1	179	36	14759	0.355841
GO:0051968	positive regulation of synaptic transmission, glutamatergic	biological_process	9	Ror2	1	179	36	14759	0.355841
GO:0042169	SH2 domain binding	molecular_function	6	Dag1	1	179	36	14759	0.355841
GO:0070059	intrinsic apoptotic signaling pathway in response to endoplasmic reticulum stress	biological_process	7	Pml	1	179	36	14759	0.355841
GO:0007032	endosome organization	biological_process	7	Rab5b	1	179	36	14759	0.355841
GO:0006953	acute-phase response	biological_process	8	Hps5	1	179	36	14759	0.355841
GO:0019888	protein phosphatase regulator activity	molecular_function	6	Phactr4	1	179	36	14759	0.355841
GO:0004402	histone acetyltransferase activity	molecular_function	11	Epc1	1	179	36	14759	0.355841
GO:0001578	microtubule bundle formation	biological_process	8	Map2	1	179	36	14759	0.355841
GO:0043408	regulation of MAPK cascade	biological_process	10	Ror2	1	179	36	14759	0.355841
GO:0005884	actin filament	cellular_component	7	Actn1;Cttn	2	179	103	14759	0.35592
GO:0035335	peptidyl-tyrosine dephosphorylation	biological_process	10	Ptpmt1;Ptprc	2	179	103	14759	0.35592
GO:0007568	aging	biological_process	4	Cyp1a1;Dag1;Dnmt3a;Penk	4	179	250	14759	0.360022
GO:1902600	proton transmembrane transport	biological_process	9	Atp5mc2;Atp6v1a	2	179	104	14759	0.360302
GO:0051276	chromosome organization	biological_process	6	Blm	1	179	37	14759	0.363672
GO:0007157	heterophilic cell-cell adhesion via plasma membrane cell adhesion molecules	biological_process	7	Cdh2	1	179	37	14759	0.363672
GO:0051017	actin filament bundle assembly	biological_process	6	Actn1	1	179	37	14759	0.363672
GO:0007026	negative regulation of microtubule depolymerization	biological_process	10	Camsap2	1	179	37	14759	0.363672
GO:0000077	DNA damage checkpoint	biological_process	7	Pea15	1	179	37	14759	0.363672
GO:0001816	cytokine production	biological_process	4	S1pr3	1	179	37	14759	0.363672
GO:0043209	myelin sheath	cellular_component	4	Serinc5	1	179	37	14759	0.363672
GO:0016236	macroautophagy	biological_process	7	Tbc1d5	1	179	37	14759	0.363672
GO:0017124	SH3 domain binding	molecular_function	6	Dennd1a;Enah	2	179	105	14759	0.364673
GO:0004725	protein tyrosine phosphatase activity	molecular_function	9	Ptpmt1;Ptprc	2	179	105	14759	0.364673
GO:0009887	animal organ morphogenesis	biological_process	5	Cul1;Meis3	2	179	105	14759	0.364673
GO:0043197	dendritic spine	cellular_component	7	Actn1;Cttn;Nedd4	3	179	178	14759	0.366721
GO:0006874	cellular calcium ion homeostasis	biological_process	11	Atp13a2;Stim1	2	179	106	14759	0.369032
GO:0007528	neuromuscular junction development	biological_process	6	Nedd4	1	179	38	14759	0.371409
GO:0007339	binding of sperm to zona pellucida	biological_process	7	Ubap2l	1	179	38	14759	0.371409
GO:0051219	phosphoprotein binding	molecular_function	5	Igf2r	1	179	38	14759	0.371409
GO:0030155	regulation of cell adhesion	biological_process	5	Pml	1	179	38	14759	0.371409
GO:0001662	behavioral fear response	biological_process	7	Penk	1	179	38	14759	0.371409
GO:0032420	stereocilium	cellular_component	6	Calb2	1	179	38	14759	0.371409
GO:0000723	telomere maintenance	biological_process	8	Blm	1	179	38	14759	0.371409
GO:0070555	response to interleukin-1	biological_process	7	Irak3	1	179	38	14759	0.371409
GO:0050873	brown fat cell differentiation	biological_process	7	Adipoq	1	179	38	14759	0.371409
GO:0061631	ubiquitin conjugating enzyme activity	molecular_function	7	Ube2o	1	179	38	14759	0.371409
GO:0030513	positive regulation of BMP signaling pathway	biological_process	11	Ube2o	1	179	38	14759	0.371409
GO:0055072	iron ion homeostasis	biological_process	11	Steap2	1	179	38	14759	0.371409
GO:0006605	protein targeting	biological_process	11	Pml	1	179	38	14759	0.371409
GO:0016592	mediator complex	cellular_component	4	Med13	1	179	38	14759	0.371409
GO:0070534	protein K63-linked ubiquitination	biological_process	13	Ube2o	1	179	38	14759	0.371409
GO:0030659	cytoplasmic vesicle membrane	cellular_component	6	Cltb;Myof	2	179	107	14759	0.37338
GO:0016324	apical plasma membrane	cellular_component	5	Atp6v1a;Cdh2;Mpp5;Slc22a5;Slco2b1	5	179	332	14759	0.376405
GO:0045121	membrane raft	cellular_component	6	Birc2;Dag1;Ptprc;Tlr6	4	179	256	14759	0.376556
GO:0003714	transcription corepressor activity	molecular_function	5	Hnrnpu;Noc2l;Parp9	3	179	181	14759	0.37662
GO:0070588	calcium ion transmembrane transport	biological_process	11	Slc25a25;Stim1	2	179	108	14759	0.377716
GO:0003712	transcription coregulator activity	molecular_function	4	Brd4;Med13	2	179	108	14759	0.377716
GO:0048565	digestive tract development	biological_process	6	Cyp1a1	1	179	39	14759	0.379052
GO:0005844	polysome	cellular_component	5	Msi1	1	179	39	14759	0.379052
GO:0050919	negative chemotaxis	biological_process	6	Sema4c	1	179	39	14759	0.379052
GO:0030010	establishment of cell polarity	biological_process	5	Map2	1	179	39	14759	0.379052
GO:0005771	multivesicular body	cellular_component	9	Atp13a2	1	179	39	14759	0.379052
GO:0060170	ciliary membrane	cellular_component	6	Cltb	1	179	39	14759	0.379052
GO:0034612	response to tumor necrosis factor	biological_process	7	Adipoq	1	179	39	14759	0.379052
GO:0031463	Cul3-RING ubiquitin ligase complex	cellular_component	7	Klhl25	1	179	39	14759	0.379052
GO:0007010	cytoskeleton organization	biological_process	6	AABR07007032;Mast3	2	179	110	14759	0.38635
GO:0032515	negative regulation of phosphoprotein phosphatase activity	biological_process	12	Phactr4	1	179	40	14759	0.386603
GO:0045930	negative regulation of mitotic cell cycle	biological_process	8	Pml	1	179	40	14759	0.386603
GO:0071526	semaphorin-plexin signaling pathway	biological_process	6	Sema4c	1	179	40	14759	0.386603
GO:0032731	positive regulation of interleukin-1 beta production	biological_process	9	Nlrp1a	1	179	40	14759	0.386603
GO:0034260	negative regulation of GTPase activity	biological_process	8	Wnk1	1	179	40	14759	0.386603
GO:0005765	lysosomal membrane	cellular_component	9	Atp13a2;Marchf2;Spag9	3	179	186	14759	0.393047
GO:0006325	chromatin organization	biological_process	5	Brd4;Dnmt3a;Hnrnpu	3	179	186	14759	0.393047
GO:0050769	positive regulation of neurogenesis	biological_process	9	Hap1	1	179	41	14759	0.394063
GO:0043198	dendritic shaft	cellular_component	5	Map2	1	179	41	14759	0.394063
GO:0000794	condensed nuclear chromosome	cellular_component	8	Brd4	1	179	41	14759	0.394063
GO:0005109	frizzled binding	molecular_function	7	Ror2	1	179	41	14759	0.394063
GO:0007599	hemostasis	biological_process	6	Zfp385a	1	179	41	14759	0.394063
GO:0001974	blood vessel remodeling	biological_process	5	Mef2c	1	179	41	14759	0.394063
GO:0048015	phosphatidylinositol-mediated signaling	biological_process	7	Ogt	1	179	41	14759	0.394063
GO:1904646	cellular response to amyloid-beta	biological_process	9	Tlr6	1	179	41	14759	0.394063
GO:0004713	protein tyrosine kinase activity	molecular_function	8	Epha5;Fgfr3	2	179	112	14759	0.394933
GO:0016301	kinase activity	molecular_function	6	Dyrk1b;Fgfr3;Irak3;Mast3;Mpp5;Pdk3;Ror2;Rps6ka5;Wnk1	9	179	654	14759	0.397597
GO:0048856	anatomical structure development	biological_process	4	Ror2	1	179	42	14759	0.401432
GO:0010507	negative regulation of autophagy	biological_process	9	Tbc1d14	1	179	42	14759	0.401432
GO:0043021	ribonucleoprotein complex binding	molecular_function	5	Hnrnpu	1	179	42	14759	0.401432
GO:0006890	retrograde vesicle-mediated transport, Golgi to endoplasmic reticulum	biological_process	8	Kif1c	1	179	42	14759	0.401432
GO:0033613	activating transcription factor binding	molecular_function	7	Mef2c	1	179	42	14759	0.401432
GO:0016459	myosin complex	cellular_component	4	Myh9l1	1	179	42	14759	0.401432
GO:0046326	positive regulation of glucose import	biological_process	10	Adipoq	1	179	42	14759	0.401432
GO:0030054	cell junction	cellular_component	3	Actn1;Arhgef7;Cdh2;Cttn;Dag1;Dnm1l;Enah;Itgb4;Mpp5	9	179	657	14759	0.402822
GO:0009968	negative regulation of signal transduction	biological_process	8	Rgs3	1	179	43	14759	0.408713
GO:0035019	somatic stem cell population maintenance	biological_process	5	Fgfr3	1	179	43	14759	0.408713
GO:0009925	basal plasma membrane	cellular_component	5	Dag1	1	179	43	14759	0.408713
GO:0007346	regulation of mitotic cell cycle	biological_process	7	Hnrnpu	1	179	43	14759	0.408713
GO:0009314	response to radiation	biological_process	5	Penk	1	179	43	14759	0.408713
GO:0032465	regulation of cytokinesis	biological_process	8	Kif13a	1	179	43	14759	0.408713
GO:0006694	steroid biosynthetic process	biological_process	7	Cyp1a1	1	179	43	14759	0.408713
GO:0045666	positive regulation of neuron differentiation	biological_process	10	Mef2c;Spag9	2	179	116	14759	0.411931
GO:0000776	kinetochore	cellular_component	4	Dync1li2;Hnrnpu	2	179	116	14759	0.411931
GO:0030018	Z disc	cellular_component	5	Actn1;Sptan1	2	179	116	14759	0.411931
GO:0051898	negative regulation of protein kinase B signaling	biological_process	10	Dag1	1	179	44	14759	0.415905
GO:0008333	endosome to lysosome transport	biological_process	8	Kif13a	1	179	44	14759	0.415905
GO:0048678	response to axon injury	biological_process	6	Fgfr3	1	179	44	14759	0.415905
GO:0030276	clathrin binding	molecular_function	5	Dnm1l	1	179	44	14759	0.415905
GO:0042645	mitochondrial nucleoid	cellular_component	4	Grsf1	1	179	44	14759	0.415905
GO:0030136	clathrin-coated vesicle	cellular_component	8	Dennd1a	1	179	44	14759	0.415905
GO:0003682	chromatin binding	molecular_function	4	Brd4;Dnmt3a;Hnrnpu;Mef2c;Meis3;Noc2l;Top2a	7	179	508	14759	0.420124
GO:0050767	regulation of neurogenesis	biological_process	8	Dock7	1	179	45	14759	0.42301
GO:0046677	response to antibiotic	biological_process	5	Cyp1a1	1	179	45	14759	0.42301
GO:0000079	regulation of cyclin-dependent protein serine/threonine kinase activity	biological_process	12	Blm	1	179	45	14759	0.42301
GO:0032391	photoreceptor connecting cilium	cellular_component	6	Tmem237	1	179	45	14759	0.42301
GO:0032781	positive regulation of ATPase activity	biological_process	8	Dnajb4	1	179	45	14759	0.42301
GO:0005730	nucleolus	cellular_component	6	Blm;Hap1;Ilf3;Itgb4;Noc2l;Pdk3;Pml;Sf3b3;Top2a	9	179	670	14759	0.425476
GO:0060271	cilium assembly	biological_process	7	AABR07007032;Tmem216;Tmem237	3	179	196	14759	0.425549
GO:0031965	nuclear membrane	cellular_component	5	Epc1;Itgb4;Pml	3	179	197	14759	0.428768
GO:0032715	negative regulation of interleukin-6 production	biological_process	8	Irak3	1	179	46	14759	0.430029
GO:0008654	phospholipid biosynthetic process	biological_process	8	Chpt1	1	179	46	14759	0.430029
GO:0048813	dendrite morphogenesis	biological_process	9	Map2	1	179	46	14759	0.430029
GO:0030217	T cell differentiation	biological_process	8	Ptprc	1	179	46	14759	0.430029
GO:0009986	cell surface	cellular_component	4	Adipoq;Cdh2;Fgfr3;Hnrnpu;Igf2r;Itgb4;Ptprc;Ror2	8	179	594	14759	0.432434
GO:0090090	negative regulation of canonical Wnt signaling pathway	biological_process	10	Cdh2;Ror2	2	179	121	14759	0.432845
GO:0006816	calcium ion transport	biological_process	10	Dnm1l;Stim1	2	179	121	14759	0.432845
GO:0090102	cochlea development	biological_process	5	Fgfr3	1	179	47	14759	0.436964
GO:0006612	protein targeting to membrane	biological_process	12	Vps37c	1	179	47	14759	0.436964
GO:0071310	cellular response to organic substance	biological_process	6	Map2	1	179	47	14759	0.436964
GO:0007193	adenylate cyclase-inhibiting G protein-coupled receptor signaling pathway	biological_process	8	S1pr3	1	179	47	14759	0.436964
GO:0051020	GTPase binding	molecular_function	6	Golga4	1	179	47	14759	0.436964
GO:0051879	Hsp90 protein binding	molecular_function	6	Cyp1a1	1	179	47	14759	0.436964
GO:0030173	integral component of Golgi membrane	cellular_component	7	Steap2	1	179	47	14759	0.436964
GO:0045596	negative regulation of cell differentiation	biological_process	7	Fgfr3	1	179	47	14759	0.436964
GO:0008138	protein tyrosine/serine/threonine phosphatase activity	molecular_function	9	Ptpmt1	1	179	47	14759	0.436964
GO:0014704	intercalated disc	cellular_component	6	Cdh2	1	179	47	14759	0.436964
GO:0010243	response to organonitrogen compound	biological_process	6	Birc2	1	179	47	14759	0.436964
GO:0030336	negative regulation of cell migration	biological_process	8	Adipoq;Dag1	2	179	122	14759	0.436981
GO:0016604	nuclear body	cellular_component	7	Epc1;Fbxl3;Ube2o;Zfp496	4	179	279	14759	0.439382
GO:0062023	collagen-containing extracellular matrix	cellular_component	5	Efemp1;Prelp	2	179	123	14759	0.4411
GO:0042826	histone deacetylase binding	molecular_function	6	Mef2c;Top2a	2	179	123	14759	0.4411
GO:0042594	response to starvation	biological_process	5	Tbc1d5	1	179	48	14759	0.443814
GO:0016529	sarcoplasmic reticulum	cellular_component	7	Stim1	1	179	48	14759	0.443814
GO:0030544	Hsp70 protein binding	molecular_function	6	Cyp1a1	1	179	48	14759	0.443814
GO:2001234	negative regulation of apoptotic signaling pathway	biological_process	9	Meis3	1	179	48	14759	0.443814
GO:0030178	negative regulation of Wnt signaling pathway	biological_process	9	Mdfi	1	179	48	14759	0.443814
GO:0009966	regulation of signal transduction	biological_process	7	Cdh2	1	179	48	14759	0.443814
GO:0045429	positive regulation of nitric oxide biosynthetic process	biological_process	9	Tlr6	1	179	48	14759	0.443814
GO:0006836	neurotransmitter transport	biological_process	6	Cltb	1	179	48	14759	0.443814
GO:0070491	repressing transcription factor binding	molecular_function	7	Noc2l	1	179	48	14759	0.443814
GO:0004721	phosphoprotein phosphatase activity	molecular_function	8	Ptpmt1;Ptprc	2	179	124	14759	0.445203
GO:0005923	bicellular tight junction	cellular_component	6	Actn1;Mpp5	2	179	124	14759	0.445203
GO:0019882	antigen processing and presentation	biological_process	4	Rab5b	1	179	49	14759	0.450582
GO:0043484	regulation of RNA splicing	biological_process	8	Grsf1	1	179	49	14759	0.450582
GO:0021915	neural tube development	biological_process	6	Sall2	1	179	49	14759	0.450582
GO:0048286	lung alveolus development	biological_process	5	Slfn4	1	179	49	14759	0.450582
GO:0045773	positive regulation of axon extension	biological_process	8	Golga4	1	179	49	14759	0.450582
GO:2001237	negative regulation of extrinsic apoptotic signaling pathway	biological_process	10	Cttn	1	179	49	14759	0.450582
GO:0097060	synaptic membrane	cellular_component	4	Calb2	1	179	49	14759	0.450582
GO:0046332	SMAD binding	molecular_function	5	Pml	1	179	49	14759	0.450582
GO:0043124	negative regulation of I-kappaB kinase/NF-kappaB signaling	biological_process	10	Adipoq	1	179	49	14759	0.450582
GO:0005080	protein kinase C binding	molecular_function	8	Top2a	1	179	50	14759	0.457267
GO:0045599	negative regulation of fat cell differentiation	biological_process	8	Adipoq	1	179	50	14759	0.457267
GO:0035914	skeletal muscle cell differentiation	biological_process	6	Mef2c	1	179	50	14759	0.457267
GO:0043666	regulation of phosphoprotein phosphatase activity	biological_process	11	Phactr4	1	179	50	14759	0.457267
GO:0043086	negative regulation of catalytic activity	biological_process	6	Parp9	1	179	50	14759	0.457267
GO:0016197	endosomal transport	biological_process	7	RGD1307100	1	179	50	14759	0.457267
GO:0045600	positive regulation of fat cell differentiation	biological_process	8	Zfp385a	1	179	50	14759	0.457267
GO:0031122	cytoplasmic microtubule organization	biological_process	8	Camsap2	1	179	50	14759	0.457267
GO:0055088	lipid homeostasis	biological_process	7	Atp13a2	1	179	51	14759	0.463872
GO:0006334	nucleosome assembly	biological_process	7	Smarca5	1	179	51	14759	0.463872
GO:0000086	G2/M transition of mitotic cell cycle	biological_process	7	Fbxl3	1	179	51	14759	0.463872
GO:0000781	chromosome, telomeric region	cellular_component	7	Blm	1	179	51	14759	0.463872
GO:0032757	positive regulation of interleukin-8 production	biological_process	8	Adipoq	1	179	51	14759	0.463872
GO:1901998	toxin transport	biological_process	6	Rab28	1	179	51	14759	0.463872
GO:0005681	spliceosomal complex	cellular_component	6	Dhx15;Hnrnpu	2	179	129	14759	0.465464
GO:0048568	embryonic organ development	biological_process	6	Tead3	1	179	52	14759	0.470397
GO:0006310	DNA recombination	biological_process	8	Blm	1	179	52	14759	0.470397
GO:0070936	protein K48-linked ubiquitination	biological_process	13	Cul1	1	179	52	14759	0.470397
GO:0003678	DNA helicase activity	molecular_function	10	Blm	1	179	52	14759	0.470397
GO:0014069	postsynaptic density	cellular_component	5	Arfgap1;Cdh2;Map2;Sema4c	4	179	291	14759	0.471483
GO:0032496	response to lipopolysaccharide	biological_process	7	Cyp1a1;Irak3;Penk	3	179	212	14759	0.476219
GO:0010923	negative regulation of phosphatase activity	biological_process	11	Wnk1	1	179	53	14759	0.476843
GO:0042220	response to cocaine	biological_process	6	Dnmt3a	1	179	53	14759	0.476843
GO:0001756	somitogenesis	biological_process	7	Ror2	1	179	53	14759	0.476843
GO:0003743	translation initiation factor activity	molecular_function	8	Eif3j	1	179	53	14759	0.476843
GO:0030183	B cell differentiation	biological_process	8	Ptprc	1	179	53	14759	0.476843
GO:0006898	receptor-mediated endocytosis	biological_process	8	Cttn	1	179	53	14759	0.476843
GO:0001890	placenta development	biological_process	6	Birc2	1	179	53	14759	0.476843
GO:0071549	cellular response to dexamethasone stimulus	biological_process	7	Hnrnpu	1	179	53	14759	0.476843
GO:0005525	GTP binding	molecular_function	8	Dnm1l;Mx2;Rab28;Rab5b;Urgcp	5	179	375	14759	0.478935
GO:0016791	phosphatase activity	molecular_function	7	Ptpmt1;Ptprc	2	179	133	14759	0.481357
GO:0007275	multicellular organism development	biological_process	4	Apold1;Fgfr3;Flii;Hnrnpu;Mef2c;Ror2;Sema4c	7	179	539	14759	0.481364
GO:0001228	DNA-binding transcription activator activity, RNA polymerase II-specific	molecular_function	6	Gtf2i;Mef2c;Meis3;Nrf1;Sall2;Tead3	6	179	458	14759	0.482477
GO:1904115	axon cytoplasm	cellular_component	6	Hap1	1	179	54	14759	0.48321
GO:0051402	neuron apoptotic process	biological_process	7	Nlrp1a	1	179	54	14759	0.48321
GO:1905515	non-motile cilium assembly	biological_process	8	Tmem216	1	179	54	14759	0.48321
GO:0009411	response to UV	biological_process	7	Pml	1	179	54	14759	0.48321
GO:0003924	GTPase activity	molecular_function	9	Dnm1l;Mx2;Rab28;Rab5b	4	179	296	14759	0.484665
GO:0031982	vesicle	cellular_component	5	Atp13a2;Dync1i2	2	179	134	14759	0.485285
GO:0031012	extracellular matrix	cellular_component	4	Aspnl1;Mmp3;Prelp	3	179	216	14759	0.488573
GO:0001764	neuron migration	biological_process	7	Mef2c;Pomgnt2	2	179	135	14759	0.489195
GO:1990090	cellular response to nerve growth factor stimulus	biological_process	8	Dync1li2	1	179	55	14759	0.489501
GO:0019905	syntaxin binding	molecular_function	6	Sptan1	1	179	55	14759	0.489501
GO:0001558	regulation of cell growth	biological_process	6	Zfp382	1	179	55	14759	0.489501
GO:0030374	nuclear receptor transcription coactivator activity	molecular_function	6	Actn1	1	179	55	14759	0.489501
GO:0043280	positive regulation of cysteine-type endopeptidase activity involved in apoptotic process	biological_process	10	Nlrp1a	1	179	55	14759	0.489501
GO:0016358	dendrite development	biological_process	8	Map2	1	179	55	14759	0.489501
GO:0009566	fertilization	biological_process	4	Tdrkh	1	179	55	14759	0.489501
GO:0030154	cell differentiation	biological_process	5	Apold1;Fgfr3;Hnrnpu;Mef2c;Ror2;Sema4c;Uhrf2	7	179	545	14759	0.493045
GO:0043621	protein self-association	molecular_function	5	Zfp496	1	179	56	14759	0.495716
GO:0035094	response to nicotine	biological_process	6	Penk	1	179	56	14759	0.495716
GO:0001102	RNA polymerase II activating transcription factor binding	molecular_function	8	Gtf2i	1	179	56	14759	0.495716
GO:0048167	regulation of synaptic plasticity	biological_process	9	Mef2c	1	179	56	14759	0.495716
GO:0030838	positive regulation of actin filament polymerization	biological_process	9	Cttn	1	179	56	14759	0.495716
GO:0005178	integrin binding	molecular_function	6	Actn1;S1pr3	2	179	138	14759	0.500812
GO:0000777	condensed chromosome kinetochore	cellular_component	5	Hnrnpu	1	179	57	14759	0.501855
GO:0010942	positive regulation of cell death	biological_process	7	Dnmt3a	1	179	57	14759	0.501855
GO:0031490	chromatin DNA binding	molecular_function	7	Hnrnpu	1	179	57	14759	0.501855
GO:0051591	response to cAMP	biological_process	8	Birc2	1	179	57	14759	0.501855
GO:0071456	cellular response to hypoxia	biological_process	6	Dnmt3a;Egln2	2	179	139	14759	0.504647
GO:0016323	basolateral plasma membrane	cellular_component	5	Cdh2;Dag1;Slc22a5	3	179	222	14759	0.506837
GO:0000790	nuclear chromatin	cellular_component	7	Brd4;Mef2c;Zfp385a	3	179	222	14759	0.506837
GO:0042552	myelination	biological_process	6	Serinc5	1	179	58	14759	0.50792
GO:0031397	negative regulation of protein ubiquitination	biological_process	11	Ogt	1	179	58	14759	0.50792
GO:0071005	U2-type precatalytic spliceosome	cellular_component	8	Sf3b3	1	179	58	14759	0.50792
GO:0032760	positive regulation of tumor necrosis factor production	biological_process	9	Ptprc	1	179	58	14759	0.50792
GO:0001085	RNA polymerase II transcription factor binding	molecular_function	6	Tead3	1	179	58	14759	0.50792
GO:0007267	cell-cell signaling	biological_process	5	Fgfr3	1	179	58	14759	0.50792
GO:0031648	protein destabilization	biological_process	6	Fbxl3	1	179	58	14759	0.50792
GO:0031334	positive regulation of protein-containing complex assembly	biological_process	7	Bid	1	179	58	14759	0.50792
GO:0005741	mitochondrial outer membrane	cellular_component	6	Bid;Dnm1l	2	179	140	14759	0.508463
GO:0042493	response to drug	biological_process	5	Adipoq;Cyp1a1;Dnmt3a;Usp47	5	179	389	14759	0.511249
GO:0006909	phagocytosis	biological_process	7	RGD1307100	1	179	59	14759	0.513912
GO:0043022	ribosome binding	molecular_function	6	Abcf1	1	179	59	14759	0.513912
GO:0008289	lipid binding	molecular_function	4	Apold1;Atp5mc2;Dnm1l	3	179	225	14759	0.515843
GO:0042593	glucose homeostasis	biological_process	8	Adipoq;Pdk3	2	179	142	14759	0.516038
GO:0031625	ubiquitin protein ligase binding	molecular_function	7	Bid;Cul1;Dnm1l;Pml	4	179	309	14759	0.518302
GO:0008630	intrinsic apoptotic signaling pathway in response to DNA damage	biological_process	7	Pml	1	179	60	14759	0.519831
GO:0010212	response to ionizing radiation	biological_process	6	Dnmt3a	1	179	60	14759	0.519831
GO:0019902	phosphatase binding	molecular_function	6	Wnk1	1	179	60	14759	0.519831
GO:0060395	SMAD protein signal transduction	biological_process	5	Ror2	1	179	60	14759	0.519831
GO:0005911	cell-cell junction	cellular_component	4	Actn1;Cdh2;Dag1	3	179	228	14759	0.524762
GO:0005518	collagen binding	molecular_function	5	Aspnl1	1	179	61	14759	0.525678
GO:0051536	iron-sulfur cluster binding	molecular_function	5	Nfs1	1	179	61	14759	0.525678
GO:0042472	inner ear morphogenesis	biological_process	6	Ror2	1	179	61	14759	0.525678
GO:0007519	skeletal muscle tissue development	biological_process	8	Mef2c	1	179	61	14759	0.525678
GO:0008201	heparin binding	molecular_function	6	Prelp;Ptprc	2	179	145	14759	0.527255
GO:0006396	RNA processing	biological_process	9	Grsf1	1	179	62	14759	0.531455
GO:0006302	double-strand break repair	biological_process	9	Parp9	1	179	63	14759	0.537161
GO:0001947	heart looping	biological_process	7	Mef2c	1	179	63	14759	0.537161
GO:0019898	extrinsic component of membrane	cellular_component	4	Gba2	1	179	63	14759	0.537161
GO:0030512	negative regulation of transforming growth factor beta receptor signaling pathway	biological_process	10	Aspnl1	1	179	63	14759	0.537161
GO:0030170	pyridoxal phosphate binding	molecular_function	6	Nfs1	1	179	63	14759	0.537161
GO:0005516	calmodulin binding	molecular_function	5	Camsap2;Sptan1	2	179	148	14759	0.538296
GO:0030496	midbody	cellular_component	4	Hnrnpu;Kif13a	2	179	149	14759	0.541938
GO:0022008	neurogenesis	biological_process	6	Hap1	1	179	64	14759	0.542799
GO:0048306	calcium-dependent protein binding	molecular_function	5	Vps37c	1	179	64	14759	0.542799
GO:0031100	animal organ regeneration	biological_process	6	Igf2r	1	179	64	14759	0.542799
GO:0001664	G protein-coupled receptor binding	molecular_function	6	Itgb4	1	179	64	14759	0.542799
GO:0071230	cellular response to amino acid stimulus	biological_process	7	Dnmt3a	1	179	64	14759	0.542799
GO:0034605	cellular response to heat	biological_process	6	Myof	1	179	64	14759	0.542799
GO:0006631	fatty acid metabolic process	biological_process	9	Crot;Cyp1a1	2	179	150	14759	0.545559
GO:0045669	positive regulation of osteoblast differentiation	biological_process	8	Mef2c	1	179	65	14759	0.548368
GO:0003724	RNA helicase activity	molecular_function	10	Dhx15	1	179	65	14759	0.548368
GO:0002931	response to ischemia	biological_process	5	Bid	1	179	65	14759	0.548368
GO:0042277	peptide binding	molecular_function	5	Cltb	1	179	65	14759	0.548368
GO:0005902	microvillus	cellular_component	7	Atp6v1a	1	179	65	14759	0.548368
GO:0070830	bicellular tight junction assembly	biological_process	9	Mpp5	1	179	65	14759	0.548368
GO:0042733	embryonic digit morphogenesis	biological_process	6	Ror2	1	179	65	14759	0.548368
GO:0051865	protein autoubiquitination	biological_process	12	Uhrf2	1	179	65	14759	0.548368
GO:0048146	positive regulation of fibroblast proliferation	biological_process	8	Pml	1	179	65	14759	0.548368
GO:0051592	response to calcium ion	biological_process	7	Penk	1	179	66	14759	0.55387
GO:1990841	promoter-specific chromatin binding	molecular_function	5	Hnrnpu	1	179	66	14759	0.55387
GO:0005768	endosome	cellular_component	7	Igf2r;Kif16b;Marchf2;Rab5b;Steap2;Vps37c	6	179	493	14759	0.554606
GO:0001938	positive regulation of endothelial cell proliferation	biological_process	9	Fgfr3	1	179	67	14759	0.559305
GO:0005546	phosphatidylinositol-4,5-bisphosphate binding	molecular_function	9	Flii	1	179	67	14759	0.559305
GO:0042102	positive regulation of T cell proliferation	biological_process	11	Ptprc	1	179	67	14759	0.559305
GO:0048666	neuron development	biological_process	6	Mef2c	1	179	67	14759	0.559305
GO:0006006	glucose metabolic process	biological_process	8	Adipoq	1	179	67	14759	0.559305
GO:0005694	chromosome	cellular_component	6	Blm;Brd4;Hnrnpu	3	179	241	14759	0.562343
GO:0019901	protein kinase binding	molecular_function	7	Arhgef7;Cdh2;Fgfr1op;Ptprc;Tbc1d14;Wnk1	6	179	497	14759	0.562568
GO:0000784	nuclear chromosome, telomeric region	cellular_component	8	Pml	1	179	68	14759	0.564674
GO:1901215	negative regulation of neuron death	biological_process	8	Btbd10	1	179	68	14759	0.564674
GO:0032259	methylation	biological_process	4	Atpsckmt;Dnmt3a	2	179	156	14759	0.566867
GO:0032508	DNA duplex unwinding	biological_process	9	Blm	1	179	69	14759	0.569978
GO:0007160	cell-matrix adhesion	biological_process	6	Itgb4	1	179	69	14759	0.569978
GO:0030509	BMP signaling pathway	biological_process	10	Ror2	1	179	69	14759	0.569978
GO:0045454	cell redox homeostasis	biological_process	5	Egln2	1	179	69	14759	0.569978
GO:0034613	cellular protein localization	biological_process	6	Mpp5	1	179	69	14759	0.569978
GO:0032526	response to retinoic acid	biological_process	6	Igf2r	1	179	69	14759	0.569978
GO:0098793	presynapse	cellular_component	4	Dennd1a;RGD1307100	2	179	158	14759	0.57381
GO:0043525	positive regulation of neuron apoptotic process	biological_process	10	Fgfr3	1	179	70	14759	0.575218
GO:0000724	double-strand break repair via homologous recombination	biological_process	10	Blm	1	179	70	14759	0.575218
GO:0000381	regulation of alternative mRNA splicing, via spliceosome	biological_process	10	Hnrnpu	1	179	70	14759	0.575218
GO:0016798	hydrolase activity, acting on glycosyl bonds	molecular_function	5	Gba2	1	179	70	14759	0.575218
GO:0060079	excitatory postsynaptic potential	biological_process	7	Mef2c	1	179	70	14759	0.575218
GO:0048812	neuron projection morphogenesis	biological_process	8	Cttn	1	179	71	14759	0.580394
GO:0001568	blood vessel development	biological_process	5	Mef2c	1	179	71	14759	0.580394
GO:0019233	sensory perception of pain	biological_process	7	Penk	1	179	71	14759	0.580394
GO:0043204	perikaryon	cellular_component	5	Mpp5;Penk	2	179	160	14759	0.580671
GO:0005764	lysosome	cellular_component	8	Atp13a2;Dync1li2;Fgfr3;Marchf2	4	179	335	14759	0.582312
GO:0043434	response to peptide hormone	biological_process	6	Dag1	1	179	72	14759	0.585508
GO:0071300	cellular response to retinoic acid	biological_process	7	Mef2c	1	179	72	14759	0.585508
GO:0051216	cartilage development	biological_process	6	Fgfr3	1	179	72	14759	0.585508
GO:0008168	methyltransferase activity	molecular_function	6	Atpsckmt;Dnmt3a	2	179	162	14759	0.587452
GO:0034097	response to cytokine	biological_process	6	Pml	1	179	73	14759	0.59056
GO:0030182	neuron differentiation	biological_process	6	Dnmt3a;Mef2c	2	179	164	14759	0.594152
GO:0008076	voltage-gated potassium channel complex	cellular_component	9	Cttn	1	179	74	14759	0.59555
GO:0097110	scaffold protein binding	molecular_function	5	Nlrp1a	1	179	74	14759	0.59555
GO:0005759	mitochondrial matrix	cellular_component	7	Crot;Pdk3	2	179	165	14759	0.597471
GO:0038023	signaling receptor activity	molecular_function	4	Igf2r;Tlr6	2	179	165	14759	0.597471
GO:0031526	brush border membrane	cellular_component	6	Slc22a5	1	179	75	14759	0.60048
GO:0050729	positive regulation of inflammatory response	biological_process	9	Tlr6	1	179	75	14759	0.60048
GO:0032147	activation of protein kinase activity	biological_process	12	Wnk1	1	179	75	14759	0.60048
GO:0007224	smoothened signaling pathway	biological_process	6	Ror2	1	179	75	14759	0.60048
GO:0003677	DNA binding	molecular_function	6	Blm;Brd4;Dnmt3a;Gtf2i;Hnrnpu;Ilf3;Mef2c;Meis3;Nrf1;Smarca5;Tead3;Top2a;Uhrf2;Zfp382;Zfp496	15	179	1287	14759	0.603405
GO:0007596	blood coagulation	biological_process	7	Hps5	1	179	76	14759	0.60535
GO:0001932	regulation of protein phosphorylation	biological_process	9	Pml	1	179	76	14759	0.60535
GO:0003723	RNA binding	molecular_function	6	Dhx15;Eif4ebp3;Grsf1;Hnrnpu;Ilf3;Msi1;Poldip3;Tdrkh;Tep1	9	179	778	14759	0.606157
GO:0007179	transforming growth factor beta receptor signaling pathway	biological_process	8	Pml	1	179	77	14759	0.610161
GO:0071260	cellular response to mechanical stimulus	biological_process	6	Dag1	1	179	77	14759	0.610161
GO:0043433	negative regulation of DNA-binding transcription factor activity	biological_process	6	Med13	1	179	77	14759	0.610161
GO:0035556	intracellular signal transduction	biological_process	5	Arhgef7;Irak3;Mast3;Rps6ka5;Wnk1	5	179	436	14759	0.612957
GO:0008203	cholesterol metabolic process	biological_process	8	Gba2	1	179	78	14759	0.614914
GO:0004518	nuclease activity	molecular_function	6	Aste1	1	179	78	14759	0.614914
GO:0014068	positive regulation of phosphatidylinositol 3-kinase signaling	biological_process	10	Ror2	1	179	78	14759	0.614914
GO:0007218	neuropeptide signaling pathway	biological_process	6	Penk	1	179	78	14759	0.614914
GO:0015031	protein transport	biological_process	9	Arfgap1;Exoc2;Igf2r;Sil1;Vps37c	5	179	437	14759	0.614987
GO:0008013	beta-catenin binding	molecular_function	5	Cdh2	1	179	79	14759	0.619609
GO:0008283	cell population proliferation	biological_process	3	Cul1;Cyp1a1	2	179	172	14759	0.620141
GO:0006954	inflammatory response	biological_process	6	Nlrp1a;S1pr3;Tlr6	3	179	263	14759	0.621698
GO:0032956	regulation of actin cytoskeleton organization	biological_process	7	Epha5	1	179	80	14759	0.624248
GO:0000987	cis-regulatory region sequence-specific DNA binding	molecular_function	9	Mef2c	1	179	80	14759	0.624248
GO:0032088	negative regulation of NF-kappaB transcription factor activity	biological_process	7	Irak3	1	179	80	14759	0.624248
GO:0060021	roof of mouth development	biological_process	5	Mef2c	1	179	80	14759	0.624248
GO:0005887	integral component of plasma membrane	cellular_component	6	Cdh2;Epha5;Fgfr3;Ptprc;Ror2;Sema4c;Slco2b1;Stim1;Tlr6	9	179	792	14759	0.627625
GO:0090575	RNA polymerase II transcription factor complex	cellular_component	6	Hnrnpu	1	179	81	14759	0.62883
GO:0009749	response to glucose	biological_process	9	Adipoq	1	179	81	14759	0.62883
GO:0043679	axon terminus	cellular_component	6	Penk	1	179	81	14759	0.62883
GO:0008134	transcription factor binding	molecular_function	5	Dnmt3a;Mdfi;Mef2c;Zbtb49	4	179	357	14759	0.632513
GO:0032092	positive regulation of protein binding	biological_process	7	Arhgef7	1	179	82	14759	0.633356
GO:0009267	cellular response to starvation	biological_process	8	Ripor1	1	179	82	14759	0.633356
GO:0008233	peptidase activity	molecular_function	5	Ddi2;Mmp3;Usp24;Usp47	5	179	447	14759	0.634942
GO:0002250	adaptive immune response	biological_process	5	Nedd4	1	179	83	14759	0.637828
GO:0070062	extracellular exosome	cellular_component	7	Rab5b	1	179	83	14759	0.637828
GO:0071363	cellular response to growth factor stimulus	biological_process	7	Mef2c	1	179	83	14759	0.637828
GO:0006470	protein dephosphorylation	biological_process	9	Ptpmt1;Ptprc	2	179	178	14759	0.638784
GO:0042632	cholesterol homeostasis	biological_process	9	Med13	1	179	84	14759	0.642245
GO:0032868	response to insulin	biological_process	7	Ogt	1	179	84	14759	0.642245
GO:0043087	regulation of GTPase activity	biological_process	7	Epha5	1	179	84	14759	0.642245
GO:0031090	organelle membrane	cellular_component	4	Cyp1a1	1	179	84	14759	0.642245
GO:0005901	caveola	cellular_component	8	Myof	1	179	85	14759	0.646609
GO:0043547	positive regulation of GTPase activity	biological_process	8	Arfgap1;Arhgef7;Dennd1a	3	179	273	14759	0.646815
GO:0090305	nucleic acid phosphodiester bond hydrolysis	biological_process	8	Aste1	1	179	86	14759	0.65092
GO:0008104	protein localization	biological_process	5	Hap1	1	179	86	14759	0.65092
GO:0005802	trans-Golgi network	cellular_component	7	Cltb;Igf2r	2	179	183	14759	0.653768
GO:0021766	hippocampus development	biological_process	5	Epha5	1	179	87	14759	0.655178
GO:0045335	phagocytic vesicle	cellular_component	8	Kif16b	1	179	87	14759	0.655178
GO:0021987	cerebral cortex development	biological_process	5	Cdh2	1	179	87	14759	0.655178
GO:0005575	cellular_component	cellular_component	2	Atp13a2;Blm;Cul1;Dhx15;Eif3j;Epc1;Gtf2i;Irak3;Kif16b;Ncoa4;Parp9;Pdk3;Pea15;Pml;Sall2;Sf3b3;Smarca5;Spag9;Tmem216;Uhrf2;Zfp385a	21	179	1847	14759	0.658699
GO:0050727	regulation of inflammatory response	biological_process	8	Brd4	1	179	88	14759	0.659385
GO:0008144	drug binding	molecular_function	4	Top2a	1	179	88	14759	0.659385
GO:0008380	RNA splicing	biological_process	10	Hnrnpu;Luc7l3	2	179	185	14759	0.659622
GO:0007156	homophilic cell adhesion via plasma membrane adhesion molecules	biological_process	7	Cdh2	1	179	89	14759	0.663541
GO:0006606	protein import into nucleus	biological_process	11	Pml	1	179	89	14759	0.663541
GO:0016311	dephosphorylation	biological_process	7	Ptpmt1;Ptprc	2	179	187	14759	0.665398
GO:0031410	cytoplasmic vesicle	cellular_component	6	Cltb;Dennd1a;Dnm1l;Hap1;Marchf2;Myof	6	179	556	14759	0.671351
GO:0043195	terminal bouton	cellular_component	6	Calb2	1	179	92	14759	0.675708
GO:0005604	basement membrane	cellular_component	6	Dag1	1	179	93	14759	0.679666
GO:0033138	positive regulation of peptidyl-serine phosphorylation	biological_process	11	Dock7	1	179	93	14759	0.679666
GO:0030900	forebrain development	biological_process	5	Fgfr3	1	179	93	14759	0.679666
GO:0005543	phospholipid binding	molecular_function	5	Myof	1	179	93	14759	0.679666
GO:0010629	negative regulation of gene expression	biological_process	8	Fgfr3;Mef2c;Parp9	3	179	287	14759	0.679972
GO:0098978	glutamatergic synapse	cellular_component	4	Actn1;Cttn;Dag1;Nedd4	4	179	381	14759	0.682704
GO:0007283	spermatogenesis	biological_process	7	Dnmt3a;Igf2r;Mycbp;Tdrkh	4	179	381	14759	0.682704
GO:0006811	ion transport	biological_process	6	Atp5mc2;Atp6v1a;Slc22a5;Slco2b1;Stim1;Wnk1	6	179	563	14759	0.683065
GO:0031902	late endosome membrane	cellular_component	9	Vps37c	1	179	94	14759	0.683576
GO:0051260	protein homooligomerization	biological_process	8	Blm	1	179	94	14759	0.683576
GO:0000151	ubiquitin ligase complex	cellular_component	5	Nedd4	1	179	94	14759	0.683576
GO:0007584	response to nutrient	biological_process	7	Adipoq	1	179	94	14759	0.683576
GO:0007229	integrin-mediated signaling pathway	biological_process	6	Itgb4	1	179	94	14759	0.683576
GO:0003674	molecular_function	molecular_function	2	Aspnl1;Atp13a2;Blm;Cul1;Dhx15;Eif3j;Gtf2i;Irak3;Kif16b;Med13;Ncoa4;Parp9;Pdk3;Pea15;Penk;Pml;Ror2;Sall2;Sf3b3;Smarca5;Spag9;Tmem216;Uhrf2;Zfp385a	24	179	2131	14759	0.68538
GO:0030165	PDZ domain binding	molecular_function	6	Slc22a5	1	179	95	14759	0.687438
GO:0071346	cellular response to interferon-gamma	biological_process	8	Kif16b	1	179	95	14759	0.687438
GO:0005783	endoplasmic reticulum	cellular_component	6	Adipoq;Cyp1a1;Dnm1l;Dse;Fgfr3;Gba2;Marchf2;P4ha2;Pigc;Pomgnt2;Sil1;Stim1	13	179	1185	14759	0.687769
GO:0000165	MAPK cascade	biological_process	11	Mef2c	1	179	96	14759	0.691253
GO:0007219	Notch signaling pathway	biological_process	6	S1pr3	1	179	96	14759	0.691253
GO:0051384	response to glucocorticoid	biological_process	8	Adipoq	1	179	97	14759	0.695022
GO:0006887	exocytosis	biological_process	7	Exoc2	1	179	97	14759	0.695022
GO:0007189	adenylate cyclase-activating G protein-coupled receptor signaling pathway	biological_process	8	S1pr3	1	179	97	14759	0.695022
GO:0015293	symporter activity	molecular_function	7	Slc22a5	1	179	97	14759	0.695022
GO:0007420	brain development	biological_process	6	Bid;Cttn;Meis3	3	179	295	14759	0.697865
GO:0008285	negative regulation of cell population proliferation	biological_process	7	Fgfr3;Pml;Ror2;Zbtb49	4	179	389	14759	0.698337
GO:0005840	ribosome	cellular_component	6	Abcf1;Rps6ka5	2	179	199	14759	0.698413
GO:0003824	catalytic activity	molecular_function	3	Azin1;Blm;Cyp1a1;Gba2;Nfs1	5	179	482	14759	0.699662
GO:0010628	positive regulation of gene expression	biological_process	8	Atp13a2;Fam98a;Hnrnpu;Mef2c;Tlr6	5	179	482	14759	0.699662
GO:0042802	identical protein binding	molecular_function	5	Adipoq;Birc2;Blm;Cdh2;Ddi2;Dnm1l;Dnmt3a;Dync1li2;Eif3j;Fgfr3;Ggps1;Hnrnpu;Igf2r;Mdfi;Msi1;Spag9;Stim1;Tlr6	18	179	1633	14759	0.702297
GO:0007030	Golgi organization	biological_process	6	Arhgef7	1	179	99	14759	0.702424
GO:0005634	nucleus	cellular_component	6	Abcf1;Actn1;Azin1;Birc2;Blm;Brd4;C12H7orf61;Calb2;Cand2;Cops7a;Dag1;Dcaf8;Dnmt3a;Dyrk1b;Egln2;Epc1;Fbxl3;Fgfr1op;Fgfr3;Flii;Gtf2i;Hnrnpu;Igf2r;Ilf3;Irak3;Luc7l3;Mdfi;Med13;Mef2c;Meis3;Msi1;Mycbp;Nlrp1a;Noc2l;Nrf1;Ogt;Parp9;Pml;Rgs3;Rps6ka5;Sall2;Sf3b3;Smarca5;Tead3;Top2a;Ubap2l;Ube2o;Uhrf2;Urgcp;Usp24;Usp47;Ylpm1;Zbtb49;Zfp382;Zfp385a;Zfp496	57	179	4937	14759	0.702609
GO:0005789	endoplasmic reticulum membrane	cellular_component	5	Chpt1;Cyp1a1;Gba2;Marchf2;Pigc;Pomgnt2;Stim1	7	179	666	14759	0.703248
GO:0005815	microtubule organizing center	cellular_component	6	Fgfr1op;Hnrnpu	2	179	203	14759	0.708806
GO:0007417	central nervous system development	biological_process	6	Gba2	1	179	101	14759	0.709647
GO:0004497	monooxygenase activity	molecular_function	5	Cyp1a1	1	179	101	14759	0.709647
GO:0001501	skeletal system development	biological_process	6	Ror2	1	179	101	14759	0.709647
GO:0035091	phosphatidylinositol binding	molecular_function	6	Kif16b	1	179	101	14759	0.709647
GO:0006457	protein folding	biological_process	4	Dnajb4	1	179	101	14759	0.709647
GO:0000978	RNA polymerase II cis-regulatory region sequence-specific DNA binding	molecular_function	10	Dnmt3a;Hnrnpu;Mef2c;Nrf1;Tead3;Zbtb49	6	179	580	14759	0.71038
GO:0070374	positive regulation of ERK1 and ERK2 cascade	biological_process	12	Fgfr3;Ptprc	2	179	204	14759	0.711358
GO:0030176	integral component of endoplasmic reticulum membrane	cellular_component	7	Stim1	1	179	102	14759	0.713192
GO:0007623	circadian rhythm	biological_process	4	Adipoq	1	179	103	14759	0.716695
GO:0050728	negative regulation of inflammatory response	biological_process	9	Adipoq	1	179	103	14759	0.716695
GO:0042742	defense response to bacterium	biological_process	8	Nlrp1a	1	179	104	14759	0.720155
GO:0005198	structural molecule activity	molecular_function	3	Cltb	1	179	105	14759	0.723573
GO:0006366	transcription by RNA polymerase II	biological_process	9	Gtf2i	1	179	105	14759	0.723573
GO:0019904	protein domain specific binding	molecular_function	5	Actn1;Mpp5;Nlrp1a	3	179	308	14759	0.72532
GO:0014070	response to organic cyclic compound	biological_process	6	Birc2;Cyp1a1	2	179	210	14759	0.726278
GO:0051897	positive regulation of protein kinase B signaling	biological_process	10	Meis3	1	179	106	14759	0.72695
GO:0019221	cytokine-mediated signaling pathway	biological_process	6	Irak3	1	179	106	14759	0.72695
GO:0045202	synapse	cellular_component	3	Arfgap1;Calb2;Cdh2;Cttn;Dag1;Dennd1a;Dnm1l	7	179	683	14759	0.727728
GO:0046872	metal ion binding	molecular_function	6	AABR07007032;Actn1;Arfgap1;Atp13a2;Birc2;Blm;Calb2;Chpt1;Cyp1a1;Dnmt3a;Egln2;Ggps1;Marchf2;Mmp3;Myof;Nfs1;P4ha2;Pml;Slc25a25;Sptan1;Stim1;Top2a;Uhrf2;Zfp382;Zfp496	26	179	2353	14759	0.729001
GO:0009791	post-embryonic development	biological_process	4	Igf2r	1	179	107	14759	0.730285
GO:0009952	anterior/posterior pattern specification	biological_process	6	Grsf1	1	179	108	14759	0.73358
GO:0004222	metalloendopeptidase activity	molecular_function	8	Mmp3	1	179	108	14759	0.73358
GO:0045177	apical part of cell	cellular_component	4	Mpp5	1	179	109	14759	0.736835
GO:0006260	DNA replication	biological_process	8	Blm	1	179	109	14759	0.736835
GO:0019903	protein phosphatase binding	molecular_function	7	Cdh2	1	179	109	14759	0.736835
GO:0022857	transmembrane transporter activity	molecular_function	4	Slc22a5;Spns2	2	179	215	14759	0.738211
GO:0005179	hormone activity	molecular_function	7	Adipoq	1	179	110	14759	0.740051
GO:0003700	DNA-binding transcription factor activity	molecular_function	4	C12H7orf61;Mef2c;Nrf1;Sall2;Tead3;Zfp382;Zfp496	7	179	692	14759	0.740121
GO:0035264	multicellular organism growth	biological_process	4	Slc25a25	1	179	111	14759	0.743227
GO:0072686	mitotic spindle	cellular_component	7	Hnrnpu	1	179	112	14759	0.746365
GO:0006355	regulation of transcription, DNA-templated	biological_process	8	C12H7orf61;Efemp1;Mef2c;Meis3;Mycbp;Pml;Rps6ka5;Sall2;Tead3;Zfp382;Zfp496	11	179	1060	14759	0.746737
GO:0003690	double-stranded DNA binding	molecular_function	7	Hnrnpu	1	179	113	14759	0.749465
GO:0016853	isomerase activity	molecular_function	4	Top2a	1	179	113	14759	0.749465
GO:0015629	actin cytoskeleton	cellular_component	7	AABR07007032;Flii	2	179	221	14759	0.751946
GO:0044297	cell body	cellular_component	4	Map2	1	179	114	14759	0.752527
GO:0000278	mitotic cell cycle	biological_process	5	Dnmt3a	1	179	115	14759	0.755551
GO:0005096	GTPase activator activity	molecular_function	6	Arfgap1;Tbc1d5	2	179	223	14759	0.756385
GO:0000922	spindle pole	cellular_component	6	Hnrnpu	1	179	116	14759	0.758539
GO:0006814	sodium ion transport	biological_process	9	Slc22a5	1	179	119	14759	0.767287
GO:0047485	protein N-terminus binding	molecular_function	5	Birc2	1	179	119	14759	0.767287
GO:0030308	negative regulation of cell growth	biological_process	7	Pml	1	179	120	14759	0.770133
GO:0051091	positive regulation of DNA-binding transcription factor activity	biological_process	6	Cytl1	1	179	121	14759	0.772943
GO:0002020	protease binding	molecular_function	6	Stim1	1	179	121	14759	0.772943
GO:0001650	fibrillar center	cellular_component	7	Btbd10	1	179	121	14759	0.772943
GO:0055037	recycling endosome	cellular_component	8	Tbc1d14	1	179	121	14759	0.772943
GO:0005102	signaling receptor binding	molecular_function	5	Adipoq;Ptprc;Tlr6	3	179	334	14759	0.774368
GO:0032869	cellular response to insulin stimulus	biological_process	8	Adipoq	1	179	124	14759	0.781172
GO:0010033	response to organic substance	biological_process	5	Cyp1a1	1	179	125	14759	0.783849
GO:0008083	growth factor activity	molecular_function	7	Fgfr3	1	179	127	14759	0.789104
GO:0071356	cellular response to tumor necrosis factor	biological_process	8	Birc2	1	179	131	14759	0.799237
GO:0098794	postsynapse	cellular_component	4	Mef2c	1	179	134	14759	0.806518
GO:0098609	cell-cell adhesion	biological_process	5	Cdh2	1	179	135	14759	0.808886
GO:0016746	transferase activity, transferring acyl groups	molecular_function	5	Crot	1	179	135	14759	0.808886
GO:0006281	DNA repair	biological_process	8	Aste1;Blm	2	179	250	14759	0.809916
GO:0010951	negative regulation of endopeptidase activity	biological_process	11	Ube2o	1	179	136	14759	0.811225
GO:0016477	cell migration	biological_process	6	Cdh2;Coro6	2	179	251	14759	0.811682
GO:0000398	mRNA splicing, via spliceosome	biological_process	13	Sf3b3	1	179	139	14759	0.818074
GO:0007268	chemical synaptic transmission	biological_process	9	Penk	1	179	139	14759	0.818074
GO:0008150	biological_process	biological_process	2	Blm;Calb2;Cul1;Eif3j;Irak3;Kif16b;Med13;Parp9;Pdk3;Pml;Sall2;Sf3b3;Smarca5;Spag9;Tmem216;Uhrf2;Zfp385a	17	179	1681	14759	0.820272
GO:0006357	regulation of transcription by RNA polymerase II	biological_process	9	Epc1;Med13;Nrf1;Ogt;Zbtb49	5	179	566	14759	0.821346
GO:0045766	positive regulation of angiogenesis	biological_process	8	Stim1	1	179	141	14759	0.822501
GO:0048471	perinuclear region of cytoplasm	cellular_component	6	Adipoq;Dnm1l;Fgfr1op;Fgfr3;Igf2r;Spag9	6	179	665	14759	0.822604
GO:0055085	transmembrane transport	biological_process	6	Aspnl1;Slc22a5;Slc25a25;Slco2b1;Spns2	5	179	568	14759	0.823683
GO:0005739	mitochondrion	cellular_component	6	Atp5mc2;Atpsckmt;Bid;Cyp1a1;Dcaf8;Dnm1l;Grsf1;Ilf3;Klc2;Parp9;Pdk3;Slc25a25;Tdrkh	13	179	1324	14759	0.824613
GO:0005929	cilium	cellular_component	4	Tmem216;Tmem237	2	179	259	14759	0.825296
GO:0010976	positive regulation of neuron projection development	biological_process	11	Ror2	1	179	144	14759	0.828943
GO:0044325	ion channel binding	molecular_function	5	Actn1	1	179	145	14759	0.831038
GO:0010468	regulation of gene expression	biological_process	7	Dnm1l;Dnmt3a;Ptprc	3	179	371	14759	0.831634
GO:0000785	chromatin	cellular_component	6	Pml	1	179	148	14759	0.837171
GO:0020037	heme binding	molecular_function	6	Cyp1a1	1	179	148	14759	0.837171
GO:0005819	spindle	cellular_component	6	Hnrnpu	1	179	149	14759	0.839166
GO:0043565	sequence-specific DNA binding	molecular_function	7	Hnrnpu;Mef2c;Meis3;Zbtb49;Zfp382	5	179	582	14759	0.839366
GO:0006412	translation	biological_process	8	Abcf1;Eif3j	2	179	269	14759	0.841073
GO:0008237	metallopeptidase activity	molecular_function	7	Mmp3	1	179	152	14759	0.845006
GO:0008270	zinc ion binding	molecular_function	8	Birc2;Blm;Marchf2;Mmp3;Pml;Zfp385a	6	179	687	14759	0.84529
GO:0006508	proteolysis	biological_process	7	Ddi2;Mmp3;Usp24;Usp47	5	179	589	14759	0.846773
GO:0000209	protein polyubiquitination	biological_process	12	Birc2	1	179	153	14759	0.846905
GO:0008152	metabolic process	biological_process	3	Gba2	1	179	154	14759	0.848781
GO:0008284	positive regulation of cell population proliferation	biological_process	7	Fam98a;Fgfr1op;Fgfr3;Meis3	4	179	492	14759	0.851987
GO:0016829	lyase activity	molecular_function	4	Cyp1a1	1	179	157	14759	0.854274
GO:0036064	ciliary basal body	cellular_component	7	Rab28	1	179	158	14759	0.85606
GO:0005743	mitochondrial inner membrane	cellular_component	6	Cyp1a1;Slc25a25	2	179	281	14759	0.858303
GO:0043066	negative regulation of apoptotic process	biological_process	9	Birc2;Ube2o;Usp47	4	179	500	14759	0.860546
GO:0046983	protein dimerization activity	molecular_function	5	Mef2c	1	179	162	14759	0.862991
GO:0008021	synaptic vesicle	cellular_component	4	Mff	1	179	164	14759	0.866331
GO:0006629	lipid metabolic process	biological_process	5	Chpt1;Cyp1a1;Gba2	3	179	404	14759	0.871782
GO:0005635	nuclear envelope	cellular_component	6	Abcf1	1	179	168	14759	0.872769
GO:0004888	transmembrane signaling receptor activity	molecular_function	5	Tlr6	1	179	170	14759	0.875872
GO:0045211	postsynaptic membrane	cellular_component	5	Dag1	1	179	173	14759	0.880385
GO:0043524	negative regulation of neuron apoptotic process	biological_process	10	Mef2c	1	179	177	14759	0.88615
GO:0007049	cell cycle	biological_process	4	Hnrnpu;Uhrf2	2	179	305	14759	0.887765
GO:0050821	protein stabilization	biological_process	6	Pml	1	179	183	14759	0.894284
GO:0000976	transcription regulatory region sequence-specific DNA binding	molecular_function	8	Mef2c;Zfp382	2	179	314	14759	0.897277
GO:1990837	sequence-specific double-stranded DNA binding	molecular_function	8	Hnrnpu;Mef2c;Meis3	3	179	435	14759	0.901582
GO:0071222	cellular response to lipopolysaccharide	biological_process	8	Mef2c	1	179	189	14759	0.901839
GO:0002376	immune system process	biological_process	3	Tlr6	1	179	194	14759	0.907723
GO:0000977	RNA polymerase II regulatory region sequence-specific DNA binding	molecular_function	9	Mef2c;Sall2	2	179	330	14759	0.912367
GO:0003729	mRNA binding	molecular_function	7	Luc7l3	1	179	199	14759	0.913257
GO:0001525	angiogenesis	biological_process	5	Apold1	1	179	201	14759	0.915377
GO:0016491	oxidoreductase activity	molecular_function	4	Cyp1a1;Egln2;P4ha2	4	179	566	14759	0.916381
GO:0001934	positive regulation of protein phosphorylation	biological_process	10	Adipoq	1	179	203	14759	0.917445
GO:0009897	external side of plasma membrane	cellular_component	5	Dag1;Ptprc	2	179	338	14759	0.919112
GO:0004930	G protein-coupled receptor activity	molecular_function	6	Gpr153;S1pr3	2	179	343	14759	0.923078
GO:0042127	regulation of cell population proliferation	biological_process	6	Bid	1	179	209	14759	0.923353
GO:0008022	protein C-terminus binding	molecular_function	5	Top2a	1	179	215	14759	0.92884
GO:0016787	hydrolase activity	molecular_function	4	Blm;Ddi2;Dhx15;Dnm1l;Gba2;Mmp3;Ptpmt1;Ptprc;Usp24;Usp47	11	179	1309	14759	0.928905
GO:0007186	G protein-coupled receptor signaling pathway	biological_process	5	Gpr153;Igf2r;S1pr3	3	179	472	14759	0.928925
GO:0051301	cell division	biological_process	4	Hnrnpu	1	179	219	14759	0.93228
GO:0005667	transcription factor complex	cellular_component	4	Tead3	1	179	225	14759	0.937131
GO:0055114	oxidation-reduction process	biological_process	4	Cyp1a1;Egln2;P4ha2;Steap2	5	179	727	14759	0.944028
GO:0001227	DNA-binding transcription repressor activity, RNA polymerase II-specific	molecular_function	6	Zfp382	1	179	237	14759	0.945821
GO:0006397	mRNA processing	biological_process	10	Hnrnpu	1	179	244	14759	0.950328
GO:0006955	immune response	biological_process	4	Tlr6	1	179	245	14759	0.95094
GO:0007155	cell adhesion	biological_process	4	Cdh2;Itgb4	2	179	394	14759	0.954332
GO:0030424	axon	cellular_component	6	Mpp5;Penk	2	179	417	14759	0.964069
GO:0005576	extracellular region	cellular_component	3	Adipoq;Apold1;Aspnl1;Dag1;Hps5;Penk;Pi16;Prelp	8	179	1122	14759	0.96688
GO:0007507	heart development	biological_process	6	Mef2c	1	179	278	14759	0.967441
GO:0005615	extracellular space	cellular_component	4	Adipoq;Aspnl1;Dag1;Efemp1;Igf2r;Pi16;Prelp;Sema4c	8	179	1134	14759	0.969593
GO:0007165	signal transduction	biological_process	4	Adipoq;Fam13b;Irak3;Ralgds;Rgs3;S1pr3;Tlr6	7	179	1036	14759	0.971731
GO:0005886	plasma membrane	cellular_component	4	Actn1;Apold1;Arhgef7;Atp6v1a;Cdh2;Cltb;Cttn;Dag1;Dnajb4;Enah;Fgfr3;Igf2r;Irak3;Itgb4;Klc2;Mpp5;Myof;Ogt;Penk;Ptprc;Rab28;Rab5b;Rgs3;S1pr3;Serinc5;Slc22a5;Slco2b1;Sptan1;Steap2;Stim1	30	179	3297	14759	0.973968
GO:0016021	integral component of membrane	cellular_component	5	Apold1;Atp13a2;Atp5mc2;Atpsckmt;Cask;Cdh2;Chpt1;Dag1;Dse;Epha5;Fgfr3;Gba2;Gpr153;Gxylt1;Igf2r;Itgb4;Marchf2;Mff;Myof;Pigc;Pomgnt2;Ptprc;RGD1307100;RGD1559482;Ror2;S1pr3;Sema4c;Serinc5;Slc22a5;Slc25a25;Slco2b1;Slfn4;Spns2;St6gal1;Steap2;Stim1;Tdrkh;Tlr6;Tmem216;Tmem237	40	179	4435	14759	0.991825
GO:0000981	DNA-binding transcription factor activity, RNA polymerase II-specific	molecular_function	5	Mef2c	1	179	401	14759	0.992995
GO:0016020	membrane	cellular_component	3	Actn1;Apold1;Atp13a2;Atp5mc2;Atpsckmt;Bid;Cask;Cdh2;Chpt1;Cltb;Cttn;Cyp1a1;Dag1;Dnm1l;Dse;Epha5;Fgfr3;Gba2;Golga4;Gpr153;Gxylt1;Igf2r;Itgb4;Marchf2;Mff;Mpp5;Myof;Nedd4;Pigc;Pomgnt2;Ptprc;Rab28;RGD1307100;RGD1559482;Rgs3;Ripor1;Ror2;S1pr3;Sema4c;Serinc5;Slc22a5;Slc25a25;Slco2b1;Slfn4;Spns2;Sptan1;St6gal1;Steap2;Stim1;Tdrkh;Tlr6;Tmem216;Tmem237;Wnk1	54	179	5991	14759	0.998571
