# Supplementary material for: Whole-transcriptome sequencing and ceRNA interaction network of temporomandibular joint osteoarthritis
Source: Front Genet. 2022 Oct 5;13:962574. doi: 10.3389/fgene.2022.962574 (PMC9581126; doi:10.3389/fgene.2022.962574)
Supplement: Supplementary file 6 [file Table1.XLSX]

## Sheet: Sheet1
GO_ID	GO_Term	GO_function	GO_class	pvalue	Gene_ID	Gene_name	Description	FPKM.UAC1	FPKM.UAC2	FPKM.UAC3	FPKM.CONT_1	FPKM.CONT_2	FPKM.CONT_3	fc	log2(fc)	regulation
GO:0045087	innate immune response	biological_process	5	0	ENSRNOG00000049282	Oas2	2'-5' oligoadenylate synthetase 2 [Source:RGD Symbol;Acc:1359697]	1.13584	0.796252	0.431963	0.36197	0.392657	0.369048	2.10386	1.07304	up
GO:0045087	innate immune response	biological_process	5	0	MSTRG.10586	Rnase6	ribonuclease A family member k6 [Source:RGD Symbol;Acc:1303020]	2.74194	2.3303	1.68547	1.0146	0.903928	1.33617	2.0763	1.05401	up
GO:0045087	innate immune response	biological_process	5	0	MSTRG.1247	RGD1559962	similar to High mobility group protein 2 (HMG-2) [Source:RGD Symbol;Acc:1559962]	2.0089	1.58098	1.57628	1.87562	4.21377	5.19355	0.457874	-1.12698	down
GO:0045087	innate immune response	biological_process	5	0	MSTRG.21375	Klrk1	killer cell lectin like receptor K1 [Source:RGD Symbol;Acc:3180]	3.23628	1.16965	1.88792	0.905104	0.662451	1.16837	2.30045	1.20191	up
GO:0045087	innate immune response	biological_process	5	0	MSTRG.24842	AABR07065651	immunoglobulin heavy constant mu [Source:MGI Symbol;Acc:MGI:96448];immunoglobulin heavy chain 6 [Source:RGD Symbol;Acc:1359202]	108.546	104.979	81.0806	35.3749	47.6802	61.9222	2.03209	1.02296	up
GO:0045087	innate immune response	biological_process	5	0	MSTRG.24859	AABR07065680		2.96264	2.2759	1.45705	0.29269	0.307458	0.985669	4.22217	2.07799	up
GO:0045087	innate immune response	biological_process	5	0	MSTRG.24860	AABR07065699		5.73906	5.87897	4.84134	1.00092	1.839	2.87945	2.87783	1.52498	up
GO:0045087	innate immune response	biological_process	5	0	MSTRG.24882	AABR07065768		9.43403	10.6966	8.4656	3.03992	5.42707	5.56363	2.03813	1.02724	up
GO:0045087	innate immune response	biological_process	5	0	MSTRG.24887	AABR07065773		2.90637	1.72005	2.2461	0.857586	0.24503	0.479708	4.34331	2.11879	up
GO:0045087	innate immune response	biological_process	5	0	MSTRG.24889	AABR07065776		33.2754	16.1599	20.8336	7.35006	12.1691	14.2925	2.07825	1.05537	up
GO:0045087	innate immune response	biological_process	5	0	MSTRG.24899	AABR07065778		11.0681	11.4278	6.57345	0.20535	1.37341	1.22297	10.3755	3.37511	up
GO:0045087	innate immune response	biological_process	5	0	MSTRG.24900	AABR07065778		6.4939	13.2788	7.98489	1.31441	3.30098	1.65139	4.42931	2.14708	up
GO:0045087	innate immune response	biological_process	5	0	MSTRG.24909	AABR07065789		23.8446	27.5019	19.3177	3.32875	7.16725	15.1861	2.75149	1.46021	up
GO:0045087	innate immune response	biological_process	5	0	MSTRG.24912	AABR07065792		1.2804	3.55437	2.90645	0.623334	1.05219	0.920162	2.98234	1.57645	up
GO:0045087	innate immune response	biological_process	5	0	MSTRG.24913	AABR07065792		9.59942	12.2116	9.00202	2.63187	3.51384	5.43137	2.66155	1.41227	up
GO:0045087	innate immune response	biological_process	5	0	MSTRG.24922	AABR07065815		9.87543	11.6914	10.6547	2.1312	3.303	3.01829	3.81209	1.93058	up
GO:0045087	innate immune response	biological_process	5	0	MSTRG.24923	AABR07065815		20.3781	19.5463	14.9096	5.12869	4.43258	6.95116	3.32077	1.73152	up
GO:0045087	innate immune response	biological_process	5	0	MSTRG.24925	AABR07065821		6.77149	3.60041	3.63694	1.29743	1.92793	3.73063	2.01393	1.01001	up
GO:0045087	innate immune response	biological_process	5	0	MSTRG.24926	AABR07065823		21.2107	20.5446	20.7454	6.36467	13.1749	11.4517	2.01672	1.01201	up
GO:0045087	innate immune response	biological_process	5	0	MSTRG.24928	AABR07065823		6.14731	5.89291	4.13689	1.68635	2.98877	2.29557	2.32073	1.21458	up
GO:0045087	innate immune response	biological_process	5	0	MSTRG.24937	AABR07065883		4.18487	5.03951	4.05627	1.63212	1.45598	1.83339	2.6985	1.43216	up
GO:0045087	innate immune response	biological_process	5	0	MSTRG.24940	AABR07065886		8.05455	7.5031	6.38153	3.07353	3.87735	2.99206	2.20651	1.14177	up
GO:0045087	innate immune response	biological_process	5	0	MSTRG.4999	Trim17	tripartite motif-containing 17 [Source:RGD Symbol;Acc:69290]	0.158453	0.186512	0.244611	0.471663	0.441507	0.741154	0.356386	-1.48849	down
GO:0045087	innate immune response	biological_process	5	0	MSTRG.9426	Jchain	joining chain of multimeric IgA and IgM [Source:RGD Symbol;Acc:1310155]	132.362	133.248	97.0823	41.2594	54.0119	70.3597	2.18976	1.13077	up
GO:0042571	immunoglobulin complex, circulating	cellular_component	5	0	MSTRG.24842	AABR07065651	immunoglobulin heavy constant mu [Source:MGI Symbol;Acc:MGI:96448];immunoglobulin heavy chain 6 [Source:RGD Symbol;Acc:1359202]	108.546	104.979	81.0806	35.3749	47.6802	61.9222	2.03209	1.02296	up
GO:0042571	immunoglobulin complex, circulating	cellular_component	5	0	MSTRG.24859	AABR07065680		2.96264	2.2759	1.45705	0.29269	0.307458	0.985669	4.22217	2.07799	up
GO:0042571	immunoglobulin complex, circulating	cellular_component	5	0	MSTRG.24860	AABR07065699		5.73906	5.87897	4.84134	1.00092	1.839	2.87945	2.87783	1.52498	up
GO:0042571	immunoglobulin complex, circulating	cellular_component	5	0	MSTRG.24882	AABR07065768		9.43403	10.6966	8.4656	3.03992	5.42707	5.56363	2.03813	1.02724	up
GO:0042571	immunoglobulin complex, circulating	cellular_component	5	0	MSTRG.24887	AABR07065773		2.90637	1.72005	2.2461	0.857586	0.24503	0.479708	4.34331	2.11879	up
GO:0042571	immunoglobulin complex, circulating	cellular_component	5	0	MSTRG.24889	AABR07065776		33.2754	16.1599	20.8336	7.35006	12.1691	14.2925	2.07825	1.05537	up
GO:0042571	immunoglobulin complex, circulating	cellular_component	5	0	MSTRG.24899	AABR07065778		11.0681	11.4278	6.57345	0.20535	1.37341	1.22297	10.3755	3.37511	up
GO:0042571	immunoglobulin complex, circulating	cellular_component	5	0	MSTRG.24900	AABR07065778		6.4939	13.2788	7.98489	1.31441	3.30098	1.65139	4.42931	2.14708	up
GO:0042571	immunoglobulin complex, circulating	cellular_component	5	0	MSTRG.24909	AABR07065789		23.8446	27.5019	19.3177	3.32875	7.16725	15.1861	2.75149	1.46021	up
GO:0042571	immunoglobulin complex, circulating	cellular_component	5	0	MSTRG.24912	AABR07065792		1.2804	3.55437	2.90645	0.623334	1.05219	0.920162	2.98234	1.57645	up
GO:0042571	immunoglobulin complex, circulating	cellular_component	5	0	MSTRG.24913	AABR07065792		9.59942	12.2116	9.00202	2.63187	3.51384	5.43137	2.66155	1.41227	up
GO:0042571	immunoglobulin complex, circulating	cellular_component	5	0	MSTRG.24922	AABR07065815		9.87543	11.6914	10.6547	2.1312	3.303	3.01829	3.81209	1.93058	up
GO:0042571	immunoglobulin complex, circulating	cellular_component	5	0	MSTRG.24923	AABR07065815		20.3781	19.5463	14.9096	5.12869	4.43258	6.95116	3.32077	1.73152	up
GO:0042571	immunoglobulin complex, circulating	cellular_component	5	0	MSTRG.24925	AABR07065821		6.77149	3.60041	3.63694	1.29743	1.92793	3.73063	2.01393	1.01001	up
GO:0042571	immunoglobulin complex, circulating	cellular_component	5	0	MSTRG.24926	AABR07065823		21.2107	20.5446	20.7454	6.36467	13.1749	11.4517	2.01672	1.01201	up
GO:0042571	immunoglobulin complex, circulating	cellular_component	5	0	MSTRG.24928	AABR07065823		6.14731	5.89291	4.13689	1.68635	2.98877	2.29557	2.32073	1.21458	up
GO:0042571	immunoglobulin complex, circulating	cellular_component	5	0	MSTRG.24937	AABR07065883		4.18487	5.03951	4.05627	1.63212	1.45598	1.83339	2.6985	1.43216	up
GO:0042571	immunoglobulin complex, circulating	cellular_component	5	0	MSTRG.24940	AABR07065886		8.05455	7.5031	6.38153	3.07353	3.87735	2.99206	2.20651	1.14177	up
GO:0006955	immune response	biological_process	4	0	ENSRNOG00000049282	Oas2	2'-5' oligoadenylate synthetase 2 [Source:RGD Symbol;Acc:1359697]	1.13584	0.796252	0.431963	0.36197	0.392657	0.369048	2.10386	1.07304	up
GO:0006955	immune response	biological_process	4	0	MSTRG.12418	AABR07027447		4.03158	5.80403	5.61335	2.14461	3.54351	1.84809	2.04996	1.0356	up
GO:0006955	immune response	biological_process	4	0	MSTRG.12419	AABR07027450		5.22254	7.49322	3.87898	1.02807	1.35908	1.11401	4.73978	2.24482	up
GO:0006955	immune response	biological_process	4	0	MSTRG.16516	AABR07013111		6.53267	8.2106	6.95385	0.623792	1.26082	4.27274	3.52377	1.81712	up
GO:0006955	immune response	biological_process	4	0	MSTRG.18046	AABR07051533		4.13836	3.21649	3.46213	0.993383	0.7744	1.43955	3.37258	1.75385	up
GO:0006955	immune response	biological_process	4	0	MSTRG.18047	AABR07051533		13.6507	17.6327	13.0459	1.85549	5.3142	8.10355	2.90242	1.53726	up
GO:0006955	immune response	biological_process	4	0	MSTRG.18050	AABR07051551		16.6619	18.6611	19.8519	7.06952	5.88235	10.1237	2.39105	1.25764	up
GO:0006955	immune response	biological_process	4	0	MSTRG.18051	AABR07051548		10.3407	14.5604	11.5526	3.44427	4.16476	6.12463	2.65433	1.40835	up
GO:0006955	immune response	biological_process	4	0	MSTRG.18052	AABR07051548		8.73989	12.9756	10.5228	3.31969	3.51556	5.02611	2.71792	1.4425	up
GO:0006955	immune response	biological_process	4	0	MSTRG.18054	AABR07051564		25.943	22.6372	17.0057	6.66718	8.40608	12.7168	2.36005	1.23882	up
GO:0006955	immune response	biological_process	4	0	MSTRG.18056	RGD1563231	similar to immunoglobulin kappa-chain VK-1 [Source:RGD Symbol;Acc:1563231]	27.8463	27.4852	29.8784	11.7464	14.6929	12.2447	2.20272	1.13929	up
GO:0006955	immune response	biological_process	4	0	MSTRG.18058	AABR07051562		29.0495	37.2917	20.6054	9.04791	14.3679	19.7686	2.01338	1.00962	up
GO:0006955	immune response	biological_process	4	0	MSTRG.18059	LOC690813	Ig kappa chain V-IV region-like [Source:RGD Symbol;Acc:11052049]	6.25548	5.46443	3.61503	1.38185	2.02147	3.5876	2.19355	1.13327	up
GO:0006955	immune response	biological_process	4	0	MSTRG.18071	AABR07051611		11.5053	9.49149	9.33498	2.16478	3.47741	5.75765	2.66072	1.41182	up
GO:0006955	immune response	biological_process	4	0	MSTRG.18077	AABR07051626		13.658	13.2634	10.6381	1.19126	3.91407	4.30144	3.99281	1.9974	up
GO:0006955	immune response	biological_process	4	0	MSTRG.18083	AABR07051652		22.5808	24.5986	16.1429	3.9636	5.96273	14.0099	2.64546	1.40352	up
GO:0006955	immune response	biological_process	4	0	MSTRG.18084	AABR07051678		1.61307	1.83586	1.80872	0.532597	1.26271	0.794943	2.02979	1.02133	up
GO:0006955	immune response	biological_process	4	0	MSTRG.18087	AABR07051665		6.1947	6.21078	4.43635	1.30409	1.21108	2.09836	3.65053	1.8681	up
GO:0006955	immune response	biological_process	4	0	MSTRG.18089	AABR07051700		9.88217	8.5076	9.04375	2.35158	3.55772	5.55397	2.39317	1.25892	up
GO:0006955	immune response	biological_process	4	0	MSTRG.18094	AABR07051684		4.89394	4.94821	5.93813	0.401787	2.04347	3.82967	2.51481	1.33045	up
GO:0006955	immune response	biological_process	4	0	MSTRG.18096	RGD1565617	similar to Ig variable region, light chain [Source:RGD Symbol;Acc:1565617]	8.85781	9.64912	4.2841	0.702884	2.60088	2.97988	3.62703	1.85879	up
GO:0006955	immune response	biological_process	4	0	MSTRG.18098	AABR07051708		20.0491	15.5018	9.48626	3.04849	4.45958	6.52462	3.20945	1.68233	up
GO:0006955	immune response	biological_process	4	0	MSTRG.18102	AABR07051726		7.69068	6.68746	6.06649	1.34596	1.7464	2.30407	3.78855	1.92165	up
GO:0006955	immune response	biological_process	4	0	MSTRG.18103	AABR07051730		22.098	15.8082	12.0155	4.4752	3.70941	10.3537	2.6929	1.42916	up
GO:0006955	immune response	biological_process	4	0	MSTRG.18105	AABR07051733		13.1793	16.9557	8.95377	1.10154	4.09896	6.2414	3.41628	1.77243	up
GO:0006955	immune response	biological_process	4	0	MSTRG.18106	AABR07051731		16.6191	20.7494	8.38285	3.42705	3.2093	6.82466	3.39881	1.76503	up
GO:0006955	immune response	biological_process	4	0	MSTRG.18108	AABR07051733		2.975	3.91943	3.53429	1.12337	1.16779	2.46169	2.1942	1.1337	up
GO:0006955	immune response	biological_process	4	0	MSTRG.18110	AABR07051733		3.5116	6.97483	5.14315	0.50332	1.14677	3.78451	2.87594	1.52403	up
GO:0006955	immune response	biological_process	4	0	MSTRG.18114	AABR07051741		8.99126	11.9183	10.1824	2.52662	5.21913	4.92604	2.45364	1.29492	up
GO:0006955	immune response	biological_process	4	0	MSTRG.20541	AABR07060792		3.79889	4.40264	3.28598	0.817008	0.9481	1.58827	3.42565	1.77638	up
GO:0006955	immune response	biological_process	4	0	MSTRG.20576	AABR07060886		148.317	147.247	147.744	47.3527	72.0828	87.491	2.14234	1.09919	up
GO:0006955	immune response	biological_process	4	0	MSTRG.20632	AABR07060953		2.98995	2.35574	2.10548	0.653536	0.60893	1.08722	3.17113	1.665	up
GO:0006955	immune response	biological_process	4	0	MSTRG.20639	AABR07060963		2.67377	5.60562	3.97812	1.48755	1.13461	2.2469	2.51743	1.33195	up
GO:0006955	immune response	biological_process	4	0	MSTRG.20642	AABR07060980		8.91497	11.6028	4.82262	3.63373	2.28012	3.53916	2.68067	1.42259	up
GO:0006955	immune response	biological_process	4	0	MSTRG.20648	AABR07061003		3.82606	4.21107	2.86581	0.487861	0.959326	1.26184	4.02467	2.00887	up
GO:0006955	immune response	biological_process	4	0	MSTRG.20651	AABR07061001		21.1675	16.7108	20.2415	3.8393	4.9832	11.5482	2.8531	1.51253	up
GO:0006955	immune response	biological_process	4	0	MSTRG.20653	AABR07061005		8.12755	6.96366	4.95701	1.78254	2.15929	5.21004	2.19062	1.13134	up
GO:0006955	immune response	biological_process	4	0	MSTRG.20657	AABR07061022		2.94007	3.71657	2.65278	0.558551	0.9481	1.49917	3.09713	1.63093	up
GO:0006955	immune response	biological_process	4	0	MSTRG.20664	AABR07061052		19.7847	16.2141	18.8922	4.1683	4.39382	9.85854	2.97986	1.57525	up
GO:0005615	extracellular space	cellular_component	4	0	ENSRNOG00000001739	Meltf	melanotransferrin [Source:RGD Symbol;Acc:1308155]	0.547705	1.43145	0.847265	0.639556	0.295855	0.228587	2.4282	1.27989	up
GO:0005615	extracellular space	cellular_component	4	0	ENSRNOG00000005008	Angpt4	angiopoietin 4 [Source:RGD Symbol;Acc:1307539]	0.957383	0.605696	0.869505	0.442478	0.367232	0.262644	2.26845	1.18171	up
GO:0005615	extracellular space	cellular_component	4	0	MSTRG.10586	Rnase6	ribonuclease A family member k6 [Source:RGD Symbol;Acc:1303020]	2.74194	2.3303	1.68547	1.0146	0.903928	1.33617	2.0763	1.05401	up
GO:0005615	extracellular space	cellular_component	4	0	MSTRG.10688	Cma1	chymase 1 [Source:RGD Symbol;Acc:2365]	4.6429	2.56201	3.59294	1.91197	1.46093	1.90488	2.04591	1.03274	up
GO:0005615	extracellular space	cellular_component	4	0	MSTRG.12418	AABR07027447		4.03158	5.80403	5.61335	2.14461	3.54351	1.84809	2.04996	1.0356	up
GO:0005615	extracellular space	cellular_component	4	0	MSTRG.12419	AABR07027450		5.22254	7.49322	3.87898	1.02807	1.35908	1.11401	4.73978	2.24482	up
GO:0005615	extracellular space	cellular_component	4	0	MSTRG.1247	RGD1559962	similar to High mobility group protein 2 (HMG-2) [Source:RGD Symbol;Acc:1559962]	2.0089	1.58098	1.57628	1.87562	4.21377	5.19355	0.457874	-1.12698	down
GO:0005615	extracellular space	cellular_component	4	0	MSTRG.1268	Ccn2	cellular communication network factor 2 [Source:RGD Symbol;Acc:621392]	97.162	163.002	90.2827	62.7941	47.5404	55.8168	2.1092	1.0767	up
GO:0005615	extracellular space	cellular_component	4	0	MSTRG.16516	AABR07013111		6.53267	8.2106	6.95385	0.623792	1.26082	4.27274	3.52377	1.81712	up
GO:0005615	extracellular space	cellular_component	4	0	MSTRG.18046	AABR07051533		4.13836	3.21649	3.46213	0.993383	0.7744	1.43955	3.37258	1.75385	up
GO:0005615	extracellular space	cellular_component	4	0	MSTRG.18047	AABR07051533		13.6507	17.6327	13.0459	1.85549	5.3142	8.10355	2.90242	1.53726	up
GO:0005615	extracellular space	cellular_component	4	0	MSTRG.18050	AABR07051551		16.6619	18.6611	19.8519	7.06952	5.88235	10.1237	2.39105	1.25764	up
GO:0005615	extracellular space	cellular_component	4	0	MSTRG.18051	AABR07051548		10.3407	14.5604	11.5526	3.44427	4.16476	6.12463	2.65433	1.40835	up
GO:0005615	extracellular space	cellular_component	4	0	MSTRG.18052	AABR07051548		8.73989	12.9756	10.5228	3.31969	3.51556	5.02611	2.71792	1.4425	up
GO:0005615	extracellular space	cellular_component	4	0	MSTRG.18054	AABR07051564		25.943	22.6372	17.0057	6.66718	8.40608	12.7168	2.36005	1.23882	up
GO:0005615	extracellular space	cellular_component	4	0	MSTRG.18056	RGD1563231	similar to immunoglobulin kappa-chain VK-1 [Source:RGD Symbol;Acc:1563231]	27.8463	27.4852	29.8784	11.7464	14.6929	12.2447	2.20272	1.13929	up
GO:0005615	extracellular space	cellular_component	4	0	MSTRG.18058	AABR07051562		29.0495	37.2917	20.6054	9.04791	14.3679	19.7686	2.01338	1.00962	up
GO:0005615	extracellular space	cellular_component	4	0	MSTRG.18059	LOC690813	Ig kappa chain V-IV region-like [Source:RGD Symbol;Acc:11052049]	6.25548	5.46443	3.61503	1.38185	2.02147	3.5876	2.19355	1.13327	up
GO:0005615	extracellular space	cellular_component	4	0	MSTRG.18071	AABR07051611		11.5053	9.49149	9.33498	2.16478	3.47741	5.75765	2.66072	1.41182	up
GO:0005615	extracellular space	cellular_component	4	0	MSTRG.18077	AABR07051626		13.658	13.2634	10.6381	1.19126	3.91407	4.30144	3.99281	1.9974	up
GO:0005615	extracellular space	cellular_component	4	0	MSTRG.18083	AABR07051652		22.5808	24.5986	16.1429	3.9636	5.96273	14.0099	2.64546	1.40352	up
GO:0005615	extracellular space	cellular_component	4	0	MSTRG.18084	AABR07051678		1.61307	1.83586	1.80872	0.532597	1.26271	0.794943	2.02979	1.02133	up
GO:0005615	extracellular space	cellular_component	4	0	MSTRG.18087	AABR07051665		6.1947	6.21078	4.43635	1.30409	1.21108	2.09836	3.65053	1.8681	up
GO:0005615	extracellular space	cellular_component	4	0	MSTRG.18089	AABR07051700		9.88217	8.5076	9.04375	2.35158	3.55772	5.55397	2.39317	1.25892	up
GO:0005615	extracellular space	cellular_component	4	0	MSTRG.18094	AABR07051684		4.89394	4.94821	5.93813	0.401787	2.04347	3.82967	2.51481	1.33045	up
GO:0005615	extracellular space	cellular_component	4	0	MSTRG.18096	RGD1565617	similar to Ig variable region, light chain [Source:RGD Symbol;Acc:1565617]	8.85781	9.64912	4.2841	0.702884	2.60088	2.97988	3.62703	1.85879	up
GO:0005615	extracellular space	cellular_component	4	0	MSTRG.18098	AABR07051708		20.0491	15.5018	9.48626	3.04849	4.45958	6.52462	3.20945	1.68233	up
GO:0005615	extracellular space	cellular_component	4	0	MSTRG.18102	AABR07051726		7.69068	6.68746	6.06649	1.34596	1.7464	2.30407	3.78855	1.92165	up
GO:0005615	extracellular space	cellular_component	4	0	MSTRG.18103	AABR07051730		22.098	15.8082	12.0155	4.4752	3.70941	10.3537	2.6929	1.42916	up
GO:0005615	extracellular space	cellular_component	4	0	MSTRG.18105	AABR07051733		13.1793	16.9557	8.95377	1.10154	4.09896	6.2414	3.41628	1.77243	up
GO:0005615	extracellular space	cellular_component	4	0	MSTRG.18106	AABR07051731		16.6191	20.7494	8.38285	3.42705	3.2093	6.82466	3.39881	1.76503	up
GO:0005615	extracellular space	cellular_component	4	0	MSTRG.18108	AABR07051733		2.975	3.91943	3.53429	1.12337	1.16779	2.46169	2.1942	1.1337	up
GO:0005615	extracellular space	cellular_component	4	0	MSTRG.18110	AABR07051733		3.5116	6.97483	5.14315	0.50332	1.14677	3.78451	2.87594	1.52403	up
GO:0005615	extracellular space	cellular_component	4	0	MSTRG.18114	AABR07051741		8.99126	11.9183	10.1824	2.52662	5.21913	4.92604	2.45364	1.29492	up
GO:0005615	extracellular space	cellular_component	4	0	MSTRG.19523	Eppin	epididymal peptidase inhibitor [Source:RGD Symbol;Acc:1597722]	0.324507	0.145258	0.262712	0.463882	0.553782	0.5654	0.462696	-1.11186	down
GO:0005615	extracellular space	cellular_component	4	0	MSTRG.20541	AABR07060792		3.79889	4.40264	3.28598	0.817008	0.9481	1.58827	3.42565	1.77638	up
GO:0005615	extracellular space	cellular_component	4	0	MSTRG.20576	AABR07060886		148.317	147.247	147.744	47.3527	72.0828	87.491	2.14234	1.09919	up
GO:0005615	extracellular space	cellular_component	4	0	MSTRG.20632	AABR07060953		2.98995	2.35574	2.10548	0.653536	0.60893	1.08722	3.17113	1.665	up
GO:0005615	extracellular space	cellular_component	4	0	MSTRG.20639	AABR07060963		2.67377	5.60562	3.97812	1.48755	1.13461	2.2469	2.51743	1.33195	up
GO:0005615	extracellular space	cellular_component	4	0	MSTRG.20642	AABR07060980		8.91497	11.6028	4.82262	3.63373	2.28012	3.53916	2.68067	1.42259	up
GO:0005615	extracellular space	cellular_component	4	0	MSTRG.20648	AABR07061003		3.82606	4.21107	2.86581	0.487861	0.959326	1.26184	4.02467	2.00887	up
GO:0005615	extracellular space	cellular_component	4	0	MSTRG.20651	AABR07061001		21.1675	16.7108	20.2415	3.8393	4.9832	11.5482	2.8531	1.51253	up
GO:0005615	extracellular space	cellular_component	4	0	MSTRG.20653	AABR07061005		8.12755	6.96366	4.95701	1.78254	2.15929	5.21004	2.19062	1.13134	up
GO:0005615	extracellular space	cellular_component	4	0	MSTRG.20657	AABR07061022		2.94007	3.71657	2.65278	0.558551	0.9481	1.49917	3.09713	1.63093	up
GO:0005615	extracellular space	cellular_component	4	0	MSTRG.20664	AABR07061052		19.7847	16.2141	18.8922	4.1683	4.39382	9.85854	2.97986	1.57525	up
GO:0005615	extracellular space	cellular_component	4	0	MSTRG.22340	Orm1	orosomucoid 1 [Source:RGD Symbol;Acc:67390]	4.8938	3.42053	6.50671	1.77483	2.27479	2.66802	2.20629	1.14162	up
GO:0005615	extracellular space	cellular_component	4	0	MSTRG.23343	Angptl7	angiopoietin like 7 [Source:RGD Symbol;Acc:7553363]	7.81835	7.9259	4.33571	2.35398	2.94155	2.14646	2.6982	1.432	up
GO:0005615	extracellular space	cellular_component	4	0	MSTRG.24842	AABR07065651	immunoglobulin heavy constant mu [Source:MGI Symbol;Acc:MGI:96448];immunoglobulin heavy chain 6 [Source:RGD Symbol;Acc:1359202]	108.546	104.979	81.0806	35.3749	47.6802	61.9222	2.03209	1.02296	up
GO:0005615	extracellular space	cellular_component	4	0	MSTRG.29376	Igfbp2	insulin-like growth factor binding protein 2 [Source:RGD Symbol;Acc:2873]	0.073613	0.214964	0.510057	2.1311	1.26299	0.635682	0.198184	-2.33509	down
GO:0005615	extracellular space	cellular_component	4	0	MSTRG.7077	Adipoq	adiponectin, C1Q and collagen domain containing [Source:RGD Symbol;Acc:628748]	1.56388	0.891889	1.23395	0.20421	0.211193	0.290087	5.23001	2.38681	up
GO:0005615	extracellular space	cellular_component	4	0	MSTRG.9426	Jchain	joining chain of multimeric IgA and IgM [Source:RGD Symbol;Acc:1310155]	132.362	133.248	97.0823	41.2594	54.0119	70.3597	2.18976	1.13077	up
GO:0006958	complement activation, classical pathway	biological_process	6	0	MSTRG.24842	AABR07065651	immunoglobulin heavy constant mu [Source:MGI Symbol;Acc:MGI:96448];immunoglobulin heavy chain 6 [Source:RGD Symbol;Acc:1359202]	108.546	104.979	81.0806	35.3749	47.6802	61.9222	2.03209	1.02296	up
GO:0006958	complement activation, classical pathway	biological_process	6	0	MSTRG.24859	AABR07065680		2.96264	2.2759	1.45705	0.29269	0.307458	0.985669	4.22217	2.07799	up
GO:0006958	complement activation, classical pathway	biological_process	6	0	MSTRG.24860	AABR07065699		5.73906	5.87897	4.84134	1.00092	1.839	2.87945	2.87783	1.52498	up
GO:0006958	complement activation, classical pathway	biological_process	6	0	MSTRG.24882	AABR07065768		9.43403	10.6966	8.4656	3.03992	5.42707	5.56363	2.03813	1.02724	up
GO:0006958	complement activation, classical pathway	biological_process	6	0	MSTRG.24887	AABR07065773		2.90637	1.72005	2.2461	0.857586	0.24503	0.479708	4.34331	2.11879	up
GO:0006958	complement activation, classical pathway	biological_process	6	0	MSTRG.24889	AABR07065776		33.2754	16.1599	20.8336	7.35006	12.1691	14.2925	2.07825	1.05537	up
GO:0006958	complement activation, classical pathway	biological_process	6	0	MSTRG.24899	AABR07065778		11.0681	11.4278	6.57345	0.20535	1.37341	1.22297	10.3755	3.37511	up
GO:0006958	complement activation, classical pathway	biological_process	6	0	MSTRG.24900	AABR07065778		6.4939	13.2788	7.98489	1.31441	3.30098	1.65139	4.42931	2.14708	up
GO:0006958	complement activation, classical pathway	biological_process	6	0	MSTRG.24909	AABR07065789		23.8446	27.5019	19.3177	3.32875	7.16725	15.1861	2.75149	1.46021	up
GO:0006958	complement activation, classical pathway	biological_process	6	0	MSTRG.24912	AABR07065792		1.2804	3.55437	2.90645	0.623334	1.05219	0.920162	2.98234	1.57645	up
GO:0006958	complement activation, classical pathway	biological_process	6	0	MSTRG.24913	AABR07065792		9.59942	12.2116	9.00202	2.63187	3.51384	5.43137	2.66155	1.41227	up
GO:0006958	complement activation, classical pathway	biological_process	6	0	MSTRG.24922	AABR07065815		9.87543	11.6914	10.6547	2.1312	3.303	3.01829	3.81209	1.93058	up
GO:0006958	complement activation, classical pathway	biological_process	6	0	MSTRG.24923	AABR07065815		20.3781	19.5463	14.9096	5.12869	4.43258	6.95116	3.32077	1.73152	up
GO:0006958	complement activation, classical pathway	biological_process	6	0	MSTRG.24925	AABR07065821		6.77149	3.60041	3.63694	1.29743	1.92793	3.73063	2.01393	1.01001	up
GO:0006958	complement activation, classical pathway	biological_process	6	0	MSTRG.24926	AABR07065823		21.2107	20.5446	20.7454	6.36467	13.1749	11.4517	2.01672	1.01201	up
GO:0006958	complement activation, classical pathway	biological_process	6	0	MSTRG.24928	AABR07065823		6.14731	5.89291	4.13689	1.68635	2.98877	2.29557	2.32073	1.21458	up
GO:0006958	complement activation, classical pathway	biological_process	6	0	MSTRG.24937	AABR07065883		4.18487	5.03951	4.05627	1.63212	1.45598	1.83339	2.6985	1.43216	up
GO:0006958	complement activation, classical pathway	biological_process	6	0	MSTRG.24940	AABR07065886		8.05455	7.5031	6.38153	3.07353	3.87735	2.99206	2.20651	1.14177	up
GO:0003823	antigen binding	molecular_function	4	0	MSTRG.24842	AABR07065651	immunoglobulin heavy constant mu [Source:MGI Symbol;Acc:MGI:96448];immunoglobulin heavy chain 6 [Source:RGD Symbol;Acc:1359202]	108.546	104.979	81.0806	35.3749	47.6802	61.9222	2.03209	1.02296	up
GO:0003823	antigen binding	molecular_function	4	0	MSTRG.24859	AABR07065680		2.96264	2.2759	1.45705	0.29269	0.307458	0.985669	4.22217	2.07799	up
GO:0003823	antigen binding	molecular_function	4	0	MSTRG.24860	AABR07065699		5.73906	5.87897	4.84134	1.00092	1.839	2.87945	2.87783	1.52498	up
GO:0003823	antigen binding	molecular_function	4	0	MSTRG.24882	AABR07065768		9.43403	10.6966	8.4656	3.03992	5.42707	5.56363	2.03813	1.02724	up
GO:0003823	antigen binding	molecular_function	4	0	MSTRG.24887	AABR07065773		2.90637	1.72005	2.2461	0.857586	0.24503	0.479708	4.34331	2.11879	up
GO:0003823	antigen binding	molecular_function	4	0	MSTRG.24889	AABR07065776		33.2754	16.1599	20.8336	7.35006	12.1691	14.2925	2.07825	1.05537	up
GO:0003823	antigen binding	molecular_function	4	0	MSTRG.24899	AABR07065778		11.0681	11.4278	6.57345	0.20535	1.37341	1.22297	10.3755	3.37511	up
GO:0003823	antigen binding	molecular_function	4	0	MSTRG.24900	AABR07065778		6.4939	13.2788	7.98489	1.31441	3.30098	1.65139	4.42931	2.14708	up
GO:0003823	antigen binding	molecular_function	4	0	MSTRG.24909	AABR07065789		23.8446	27.5019	19.3177	3.32875	7.16725	15.1861	2.75149	1.46021	up
GO:0003823	antigen binding	molecular_function	4	0	MSTRG.24912	AABR07065792		1.2804	3.55437	2.90645	0.623334	1.05219	0.920162	2.98234	1.57645	up
GO:0003823	antigen binding	molecular_function	4	0	MSTRG.24913	AABR07065792		9.59942	12.2116	9.00202	2.63187	3.51384	5.43137	2.66155	1.41227	up
GO:0003823	antigen binding	molecular_function	4	0	MSTRG.24922	AABR07065815		9.87543	11.6914	10.6547	2.1312	3.303	3.01829	3.81209	1.93058	up
GO:0003823	antigen binding	molecular_function	4	0	MSTRG.24923	AABR07065815		20.3781	19.5463	14.9096	5.12869	4.43258	6.95116	3.32077	1.73152	up
GO:0003823	antigen binding	molecular_function	4	0	MSTRG.24925	AABR07065821		6.77149	3.60041	3.63694	1.29743	1.92793	3.73063	2.01393	1.01001	up
GO:0003823	antigen binding	molecular_function	4	0	MSTRG.24926	AABR07065823		21.2107	20.5446	20.7454	6.36467	13.1749	11.4517	2.01672	1.01201	up
GO:0003823	antigen binding	molecular_function	4	0	MSTRG.24928	AABR07065823		6.14731	5.89291	4.13689	1.68635	2.98877	2.29557	2.32073	1.21458	up
GO:0003823	antigen binding	molecular_function	4	0	MSTRG.24937	AABR07065883		4.18487	5.03951	4.05627	1.63212	1.45598	1.83339	2.6985	1.43216	up
GO:0003823	antigen binding	molecular_function	4	0	MSTRG.24940	AABR07065886		8.05455	7.5031	6.38153	3.07353	3.87735	2.99206	2.20651	1.14177	up
GO:0042742	defense response to bacterium	biological_process	8	0	MSTRG.19523	Eppin	epididymal peptidase inhibitor [Source:RGD Symbol;Acc:1597722]	0.324507	0.145258	0.262712	0.463882	0.553782	0.5654	0.462696	-1.11186	down
GO:0042742	defense response to bacterium	biological_process	8	0	MSTRG.24842	AABR07065651	immunoglobulin heavy constant mu [Source:MGI Symbol;Acc:MGI:96448];immunoglobulin heavy chain 6 [Source:RGD Symbol;Acc:1359202]	108.546	104.979	81.0806	35.3749	47.6802	61.9222	2.03209	1.02296	up
GO:0042742	defense response to bacterium	biological_process	8	0	MSTRG.24859	AABR07065680		2.96264	2.2759	1.45705	0.29269	0.307458	0.985669	4.22217	2.07799	up
GO:0042742	defense response to bacterium	biological_process	8	0	MSTRG.24860	AABR07065699		5.73906	5.87897	4.84134	1.00092	1.839	2.87945	2.87783	1.52498	up
GO:0042742	defense response to bacterium	biological_process	8	0	MSTRG.24882	AABR07065768		9.43403	10.6966	8.4656	3.03992	5.42707	5.56363	2.03813	1.02724	up
GO:0042742	defense response to bacterium	biological_process	8	0	MSTRG.24887	AABR07065773		2.90637	1.72005	2.2461	0.857586	0.24503	0.479708	4.34331	2.11879	up
GO:0042742	defense response to bacterium	biological_process	8	0	MSTRG.24889	AABR07065776		33.2754	16.1599	20.8336	7.35006	12.1691	14.2925	2.07825	1.05537	up
GO:0042742	defense response to bacterium	biological_process	8	0	MSTRG.24899	AABR07065778		11.0681	11.4278	6.57345	0.20535	1.37341	1.22297	10.3755	3.37511	up
GO:0042742	defense response to bacterium	biological_process	8	0	MSTRG.24900	AABR07065778		6.4939	13.2788	7.98489	1.31441	3.30098	1.65139	4.42931	2.14708	up
GO:0042742	defense response to bacterium	biological_process	8	0	MSTRG.24909	AABR07065789		23.8446	27.5019	19.3177	3.32875	7.16725	15.1861	2.75149	1.46021	up
GO:0042742	defense response to bacterium	biological_process	8	0	MSTRG.24912	AABR07065792		1.2804	3.55437	2.90645	0.623334	1.05219	0.920162	2.98234	1.57645	up
GO:0042742	defense response to bacterium	biological_process	8	0	MSTRG.24913	AABR07065792		9.59942	12.2116	9.00202	2.63187	3.51384	5.43137	2.66155	1.41227	up
GO:0042742	defense response to bacterium	biological_process	8	0	MSTRG.24922	AABR07065815		9.87543	11.6914	10.6547	2.1312	3.303	3.01829	3.81209	1.93058	up
GO:0042742	defense response to bacterium	biological_process	8	0	MSTRG.24923	AABR07065815		20.3781	19.5463	14.9096	5.12869	4.43258	6.95116	3.32077	1.73152	up
GO:0042742	defense response to bacterium	biological_process	8	0	MSTRG.24925	AABR07065821		6.77149	3.60041	3.63694	1.29743	1.92793	3.73063	2.01393	1.01001	up
GO:0042742	defense response to bacterium	biological_process	8	0	MSTRG.24926	AABR07065823		21.2107	20.5446	20.7454	6.36467	13.1749	11.4517	2.01672	1.01201	up
GO:0042742	defense response to bacterium	biological_process	8	0	MSTRG.24928	AABR07065823		6.14731	5.89291	4.13689	1.68635	2.98877	2.29557	2.32073	1.21458	up
GO:0042742	defense response to bacterium	biological_process	8	0	MSTRG.24937	AABR07065883		4.18487	5.03951	4.05627	1.63212	1.45598	1.83339	2.6985	1.43216	up
GO:0042742	defense response to bacterium	biological_process	8	0	MSTRG.24940	AABR07065886		8.05455	7.5031	6.38153	3.07353	3.87735	2.99206	2.20651	1.14177	up
GO:0042742	defense response to bacterium	biological_process	8	0	MSTRG.25663	Lyc2	lysozyme C type 2 [Source:RGD Symbol;Acc:1593616]	41.8054	26.3828	18.9251	18.5648	14.441	7.07027	2.1737	1.12015	up
GO:0034987	immunoglobulin receptor binding	molecular_function	6	0	MSTRG.24842	AABR07065651	immunoglobulin heavy constant mu [Source:MGI Symbol;Acc:MGI:96448];immunoglobulin heavy chain 6 [Source:RGD Symbol;Acc:1359202]	108.546	104.979	81.0806	35.3749	47.6802	61.9222	2.03209	1.02296	up
GO:0034987	immunoglobulin receptor binding	molecular_function	6	0	MSTRG.24859	AABR07065680		2.96264	2.2759	1.45705	0.29269	0.307458	0.985669	4.22217	2.07799	up
GO:0034987	immunoglobulin receptor binding	molecular_function	6	0	MSTRG.24860	AABR07065699		5.73906	5.87897	4.84134	1.00092	1.839	2.87945	2.87783	1.52498	up
GO:0034987	immunoglobulin receptor binding	molecular_function	6	0	MSTRG.24882	AABR07065768		9.43403	10.6966	8.4656	3.03992	5.42707	5.56363	2.03813	1.02724	up
GO:0034987	immunoglobulin receptor binding	molecular_function	6	0	MSTRG.24887	AABR07065773		2.90637	1.72005	2.2461	0.857586	0.24503	0.479708	4.34331	2.11879	up
GO:0034987	immunoglobulin receptor binding	molecular_function	6	0	MSTRG.24889	AABR07065776		33.2754	16.1599	20.8336	7.35006	12.1691	14.2925	2.07825	1.05537	up
GO:0034987	immunoglobulin receptor binding	molecular_function	6	0	MSTRG.24899	AABR07065778		11.0681	11.4278	6.57345	0.20535	1.37341	1.22297	10.3755	3.37511	up
GO:0034987	immunoglobulin receptor binding	molecular_function	6	0	MSTRG.24900	AABR07065778		6.4939	13.2788	7.98489	1.31441	3.30098	1.65139	4.42931	2.14708	up
GO:0034987	immunoglobulin receptor binding	molecular_function	6	0	MSTRG.24909	AABR07065789		23.8446	27.5019	19.3177	3.32875	7.16725	15.1861	2.75149	1.46021	up
GO:0034987	immunoglobulin receptor binding	molecular_function	6	0	MSTRG.24912	AABR07065792		1.2804	3.55437	2.90645	0.623334	1.05219	0.920162	2.98234	1.57645	up
GO:0034987	immunoglobulin receptor binding	molecular_function	6	0	MSTRG.24913	AABR07065792		9.59942	12.2116	9.00202	2.63187	3.51384	5.43137	2.66155	1.41227	up
GO:0034987	immunoglobulin receptor binding	molecular_function	6	0	MSTRG.24922	AABR07065815		9.87543	11.6914	10.6547	2.1312	3.303	3.01829	3.81209	1.93058	up
GO:0034987	immunoglobulin receptor binding	molecular_function	6	0	MSTRG.24923	AABR07065815		20.3781	19.5463	14.9096	5.12869	4.43258	6.95116	3.32077	1.73152	up
GO:0034987	immunoglobulin receptor binding	molecular_function	6	0	MSTRG.24925	AABR07065821		6.77149	3.60041	3.63694	1.29743	1.92793	3.73063	2.01393	1.01001	up
GO:0034987	immunoglobulin receptor binding	molecular_function	6	0	MSTRG.24926	AABR07065823		21.2107	20.5446	20.7454	6.36467	13.1749	11.4517	2.01672	1.01201	up
GO:0034987	immunoglobulin receptor binding	molecular_function	6	0	MSTRG.24928	AABR07065823		6.14731	5.89291	4.13689	1.68635	2.98877	2.29557	2.32073	1.21458	up
GO:0034987	immunoglobulin receptor binding	molecular_function	6	0	MSTRG.24937	AABR07065883		4.18487	5.03951	4.05627	1.63212	1.45598	1.83339	2.6985	1.43216	up
GO:0034987	immunoglobulin receptor binding	molecular_function	6	0	MSTRG.24940	AABR07065886		8.05455	7.5031	6.38153	3.07353	3.87735	2.99206	2.20651	1.14177	up
GO:0034987	immunoglobulin receptor binding	molecular_function	6	0	MSTRG.9426	Jchain	joining chain of multimeric IgA and IgM [Source:RGD Symbol;Acc:1310155]	132.362	133.248	97.0823	41.2594	54.0119	70.3597	2.18976	1.13077	up
GO:0050853	B cell receptor signaling pathway	biological_process	8	1.11022e-16	MSTRG.24842	AABR07065651	immunoglobulin heavy constant mu [Source:MGI Symbol;Acc:MGI:96448];immunoglobulin heavy chain 6 [Source:RGD Symbol;Acc:1359202]	108.546	104.979	81.0806	35.3749	47.6802	61.9222	2.03209	1.02296	up
GO:0050853	B cell receptor signaling pathway	biological_process	8	1.11022e-16	MSTRG.24859	AABR07065680		2.96264	2.2759	1.45705	0.29269	0.307458	0.985669	4.22217	2.07799	up
GO:0050853	B cell receptor signaling pathway	biological_process	8	1.11022e-16	MSTRG.24860	AABR07065699		5.73906	5.87897	4.84134	1.00092	1.839	2.87945	2.87783	1.52498	up
GO:0050853	B cell receptor signaling pathway	biological_process	8	1.11022e-16	MSTRG.24882	AABR07065768		9.43403	10.6966	8.4656	3.03992	5.42707	5.56363	2.03813	1.02724	up
GO:0050853	B cell receptor signaling pathway	biological_process	8	1.11022e-16	MSTRG.24887	AABR07065773		2.90637	1.72005	2.2461	0.857586	0.24503	0.479708	4.34331	2.11879	up
GO:0050853	B cell receptor signaling pathway	biological_process	8	1.11022e-16	MSTRG.24889	AABR07065776		33.2754	16.1599	20.8336	7.35006	12.1691	14.2925	2.07825	1.05537	up
GO:0050853	B cell receptor signaling pathway	biological_process	8	1.11022e-16	MSTRG.24899	AABR07065778		11.0681	11.4278	6.57345	0.20535	1.37341	1.22297	10.3755	3.37511	up
GO:0050853	B cell receptor signaling pathway	biological_process	8	1.11022e-16	MSTRG.24900	AABR07065778		6.4939	13.2788	7.98489	1.31441	3.30098	1.65139	4.42931	2.14708	up
GO:0050853	B cell receptor signaling pathway	biological_process	8	1.11022e-16	MSTRG.24909	AABR07065789		23.8446	27.5019	19.3177	3.32875	7.16725	15.1861	2.75149	1.46021	up
GO:0050853	B cell receptor signaling pathway	biological_process	8	1.11022e-16	MSTRG.24912	AABR07065792		1.2804	3.55437	2.90645	0.623334	1.05219	0.920162	2.98234	1.57645	up
GO:0050853	B cell receptor signaling pathway	biological_process	8	1.11022e-16	MSTRG.24913	AABR07065792		9.59942	12.2116	9.00202	2.63187	3.51384	5.43137	2.66155	1.41227	up
GO:0050853	B cell receptor signaling pathway	biological_process	8	1.11022e-16	MSTRG.24922	AABR07065815		9.87543	11.6914	10.6547	2.1312	3.303	3.01829	3.81209	1.93058	up
GO:0050853	B cell receptor signaling pathway	biological_process	8	1.11022e-16	MSTRG.24923	AABR07065815		20.3781	19.5463	14.9096	5.12869	4.43258	6.95116	3.32077	1.73152	up
GO:0050853	B cell receptor signaling pathway	biological_process	8	1.11022e-16	MSTRG.24925	AABR07065821		6.77149	3.60041	3.63694	1.29743	1.92793	3.73063	2.01393	1.01001	up
GO:0050853	B cell receptor signaling pathway	biological_process	8	1.11022e-16	MSTRG.24926	AABR07065823		21.2107	20.5446	20.7454	6.36467	13.1749	11.4517	2.01672	1.01201	up
GO:0050853	B cell receptor signaling pathway	biological_process	8	1.11022e-16	MSTRG.24928	AABR07065823		6.14731	5.89291	4.13689	1.68635	2.98877	2.29557	2.32073	1.21458	up
GO:0050853	B cell receptor signaling pathway	biological_process	8	1.11022e-16	MSTRG.24937	AABR07065883		4.18487	5.03951	4.05627	1.63212	1.45598	1.83339	2.6985	1.43216	up
GO:0050853	B cell receptor signaling pathway	biological_process	8	1.11022e-16	MSTRG.24940	AABR07065886		8.05455	7.5031	6.38153	3.07353	3.87735	2.99206	2.20651	1.14177	up
GO:0006910	phagocytosis, recognition	biological_process	5	1.11022e-16	MSTRG.24842	AABR07065651	immunoglobulin heavy constant mu [Source:MGI Symbol;Acc:MGI:96448];immunoglobulin heavy chain 6 [Source:RGD Symbol;Acc:1359202]	108.546	104.979	81.0806	35.3749	47.6802	61.9222	2.03209	1.02296	up
GO:0006910	phagocytosis, recognition	biological_process	5	1.11022e-16	MSTRG.24859	AABR07065680		2.96264	2.2759	1.45705	0.29269	0.307458	0.985669	4.22217	2.07799	up
GO:0006910	phagocytosis, recognition	biological_process	5	1.11022e-16	MSTRG.24860	AABR07065699		5.73906	5.87897	4.84134	1.00092	1.839	2.87945	2.87783	1.52498	up
GO:0006910	phagocytosis, recognition	biological_process	5	1.11022e-16	MSTRG.24882	AABR07065768		9.43403	10.6966	8.4656	3.03992	5.42707	5.56363	2.03813	1.02724	up
GO:0006910	phagocytosis, recognition	biological_process	5	1.11022e-16	MSTRG.24887	AABR07065773		2.90637	1.72005	2.2461	0.857586	0.24503	0.479708	4.34331	2.11879	up
GO:0006910	phagocytosis, recognition	biological_process	5	1.11022e-16	MSTRG.24889	AABR07065776		33.2754	16.1599	20.8336	7.35006	12.1691	14.2925	2.07825	1.05537	up
GO:0006910	phagocytosis, recognition	biological_process	5	1.11022e-16	MSTRG.24899	AABR07065778		11.0681	11.4278	6.57345	0.20535	1.37341	1.22297	10.3755	3.37511	up
GO:0006910	phagocytosis, recognition	biological_process	5	1.11022e-16	MSTRG.24900	AABR07065778		6.4939	13.2788	7.98489	1.31441	3.30098	1.65139	4.42931	2.14708	up
GO:0006910	phagocytosis, recognition	biological_process	5	1.11022e-16	MSTRG.24909	AABR07065789		23.8446	27.5019	19.3177	3.32875	7.16725	15.1861	2.75149	1.46021	up
GO:0006910	phagocytosis, recognition	biological_process	5	1.11022e-16	MSTRG.24912	AABR07065792		1.2804	3.55437	2.90645	0.623334	1.05219	0.920162	2.98234	1.57645	up
GO:0006910	phagocytosis, recognition	biological_process	5	1.11022e-16	MSTRG.24913	AABR07065792		9.59942	12.2116	9.00202	2.63187	3.51384	5.43137	2.66155	1.41227	up
GO:0006910	phagocytosis, recognition	biological_process	5	1.11022e-16	MSTRG.24922	AABR07065815		9.87543	11.6914	10.6547	2.1312	3.303	3.01829	3.81209	1.93058	up
GO:0006910	phagocytosis, recognition	biological_process	5	1.11022e-16	MSTRG.24923	AABR07065815		20.3781	19.5463	14.9096	5.12869	4.43258	6.95116	3.32077	1.73152	up
GO:0006910	phagocytosis, recognition	biological_process	5	1.11022e-16	MSTRG.24925	AABR07065821		6.77149	3.60041	3.63694	1.29743	1.92793	3.73063	2.01393	1.01001	up
GO:0006910	phagocytosis, recognition	biological_process	5	1.11022e-16	MSTRG.24926	AABR07065823		21.2107	20.5446	20.7454	6.36467	13.1749	11.4517	2.01672	1.01201	up
GO:0006910	phagocytosis, recognition	biological_process	5	1.11022e-16	MSTRG.24928	AABR07065823		6.14731	5.89291	4.13689	1.68635	2.98877	2.29557	2.32073	1.21458	up
GO:0006910	phagocytosis, recognition	biological_process	5	1.11022e-16	MSTRG.24937	AABR07065883		4.18487	5.03951	4.05627	1.63212	1.45598	1.83339	2.6985	1.43216	up
GO:0006910	phagocytosis, recognition	biological_process	5	1.11022e-16	MSTRG.24940	AABR07065886		8.05455	7.5031	6.38153	3.07353	3.87735	2.99206	2.20651	1.14177	up
GO:0002377	immunoglobulin production	biological_process	5	2.22045e-16	MSTRG.12418	AABR07027447		4.03158	5.80403	5.61335	2.14461	3.54351	1.84809	2.04996	1.0356	up
GO:0002377	immunoglobulin production	biological_process	5	2.22045e-16	MSTRG.12419	AABR07027450		5.22254	7.49322	3.87898	1.02807	1.35908	1.11401	4.73978	2.24482	up
GO:0002377	immunoglobulin production	biological_process	5	2.22045e-16	MSTRG.16516	AABR07013111		6.53267	8.2106	6.95385	0.623792	1.26082	4.27274	3.52377	1.81712	up
GO:0002377	immunoglobulin production	biological_process	5	2.22045e-16	MSTRG.18046	AABR07051533		4.13836	3.21649	3.46213	0.993383	0.7744	1.43955	3.37258	1.75385	up
GO:0002377	immunoglobulin production	biological_process	5	2.22045e-16	MSTRG.18047	AABR07051533		13.6507	17.6327	13.0459	1.85549	5.3142	8.10355	2.90242	1.53726	up
GO:0002377	immunoglobulin production	biological_process	5	2.22045e-16	MSTRG.18050	AABR07051551		16.6619	18.6611	19.8519	7.06952	5.88235	10.1237	2.39105	1.25764	up
GO:0002377	immunoglobulin production	biological_process	5	2.22045e-16	MSTRG.18051	AABR07051548		10.3407	14.5604	11.5526	3.44427	4.16476	6.12463	2.65433	1.40835	up
GO:0002377	immunoglobulin production	biological_process	5	2.22045e-16	MSTRG.18052	AABR07051548		8.73989	12.9756	10.5228	3.31969	3.51556	5.02611	2.71792	1.4425	up
GO:0002377	immunoglobulin production	biological_process	5	2.22045e-16	MSTRG.18054	AABR07051564		25.943	22.6372	17.0057	6.66718	8.40608	12.7168	2.36005	1.23882	up
GO:0002377	immunoglobulin production	biological_process	5	2.22045e-16	MSTRG.18056	RGD1563231	similar to immunoglobulin kappa-chain VK-1 [Source:RGD Symbol;Acc:1563231]	27.8463	27.4852	29.8784	11.7464	14.6929	12.2447	2.20272	1.13929	up
GO:0002377	immunoglobulin production	biological_process	5	2.22045e-16	MSTRG.18058	AABR07051562		29.0495	37.2917	20.6054	9.04791	14.3679	19.7686	2.01338	1.00962	up
GO:0002377	immunoglobulin production	biological_process	5	2.22045e-16	MSTRG.18059	LOC690813	Ig kappa chain V-IV region-like [Source:RGD Symbol;Acc:11052049]	6.25548	5.46443	3.61503	1.38185	2.02147	3.5876	2.19355	1.13327	up
GO:0002377	immunoglobulin production	biological_process	5	2.22045e-16	MSTRG.18071	AABR07051611		11.5053	9.49149	9.33498	2.16478	3.47741	5.75765	2.66072	1.41182	up
GO:0002377	immunoglobulin production	biological_process	5	2.22045e-16	MSTRG.18077	AABR07051626		13.658	13.2634	10.6381	1.19126	3.91407	4.30144	3.99281	1.9974	up
GO:0002377	immunoglobulin production	biological_process	5	2.22045e-16	MSTRG.18083	AABR07051652		22.5808	24.5986	16.1429	3.9636	5.96273	14.0099	2.64546	1.40352	up
GO:0002377	immunoglobulin production	biological_process	5	2.22045e-16	MSTRG.18084	AABR07051678		1.61307	1.83586	1.80872	0.532597	1.26271	0.794943	2.02979	1.02133	up
GO:0002377	immunoglobulin production	biological_process	5	2.22045e-16	MSTRG.18087	AABR07051665		6.1947	6.21078	4.43635	1.30409	1.21108	2.09836	3.65053	1.8681	up
GO:0002377	immunoglobulin production	biological_process	5	2.22045e-16	MSTRG.18089	AABR07051700		9.88217	8.5076	9.04375	2.35158	3.55772	5.55397	2.39317	1.25892	up
GO:0002377	immunoglobulin production	biological_process	5	2.22045e-16	MSTRG.18094	AABR07051684		4.89394	4.94821	5.93813	0.401787	2.04347	3.82967	2.51481	1.33045	up
GO:0002377	immunoglobulin production	biological_process	5	2.22045e-16	MSTRG.18096	RGD1565617	similar to Ig variable region, light chain [Source:RGD Symbol;Acc:1565617]	8.85781	9.64912	4.2841	0.702884	2.60088	2.97988	3.62703	1.85879	up
GO:0002377	immunoglobulin production	biological_process	5	2.22045e-16	MSTRG.18098	AABR07051708		20.0491	15.5018	9.48626	3.04849	4.45958	6.52462	3.20945	1.68233	up
GO:0002377	immunoglobulin production	biological_process	5	2.22045e-16	MSTRG.18102	AABR07051726		7.69068	6.68746	6.06649	1.34596	1.7464	2.30407	3.78855	1.92165	up
GO:0002377	immunoglobulin production	biological_process	5	2.22045e-16	MSTRG.18103	AABR07051730		22.098	15.8082	12.0155	4.4752	3.70941	10.3537	2.6929	1.42916	up
GO:0002377	immunoglobulin production	biological_process	5	2.22045e-16	MSTRG.18105	AABR07051733		13.1793	16.9557	8.95377	1.10154	4.09896	6.2414	3.41628	1.77243	up
GO:0002377	immunoglobulin production	biological_process	5	2.22045e-16	MSTRG.18106	AABR07051731		16.6191	20.7494	8.38285	3.42705	3.2093	6.82466	3.39881	1.76503	up
GO:0002377	immunoglobulin production	biological_process	5	2.22045e-16	MSTRG.18108	AABR07051733		2.975	3.91943	3.53429	1.12337	1.16779	2.46169	2.1942	1.1337	up
GO:0002377	immunoglobulin production	biological_process	5	2.22045e-16	MSTRG.18110	AABR07051733		3.5116	6.97483	5.14315	0.50332	1.14677	3.78451	2.87594	1.52403	up
GO:0002377	immunoglobulin production	biological_process	5	2.22045e-16	MSTRG.18114	AABR07051741		8.99126	11.9183	10.1824	2.52662	5.21913	4.92604	2.45364	1.29492	up
GO:0002377	immunoglobulin production	biological_process	5	2.22045e-16	MSTRG.20541	AABR07060792		3.79889	4.40264	3.28598	0.817008	0.9481	1.58827	3.42565	1.77638	up
GO:0002377	immunoglobulin production	biological_process	5	2.22045e-16	MSTRG.20576	AABR07060886		148.317	147.247	147.744	47.3527	72.0828	87.491	2.14234	1.09919	up
GO:0002377	immunoglobulin production	biological_process	5	2.22045e-16	MSTRG.20632	AABR07060953		2.98995	2.35574	2.10548	0.653536	0.60893	1.08722	3.17113	1.665	up
GO:0002377	immunoglobulin production	biological_process	5	2.22045e-16	MSTRG.20639	AABR07060963		2.67377	5.60562	3.97812	1.48755	1.13461	2.2469	2.51743	1.33195	up
GO:0002377	immunoglobulin production	biological_process	5	2.22045e-16	MSTRG.20642	AABR07060980		8.91497	11.6028	4.82262	3.63373	2.28012	3.53916	2.68067	1.42259	up
GO:0002377	immunoglobulin production	biological_process	5	2.22045e-16	MSTRG.20648	AABR07061003		3.82606	4.21107	2.86581	0.487861	0.959326	1.26184	4.02467	2.00887	up
GO:0002377	immunoglobulin production	biological_process	5	2.22045e-16	MSTRG.20651	AABR07061001		21.1675	16.7108	20.2415	3.8393	4.9832	11.5482	2.8531	1.51253	up
GO:0002377	immunoglobulin production	biological_process	5	2.22045e-16	MSTRG.20653	AABR07061005		8.12755	6.96366	4.95701	1.78254	2.15929	5.21004	2.19062	1.13134	up
GO:0002377	immunoglobulin production	biological_process	5	2.22045e-16	MSTRG.20657	AABR07061022		2.94007	3.71657	2.65278	0.558551	0.9481	1.49917	3.09713	1.63093	up
GO:0002377	immunoglobulin production	biological_process	5	2.22045e-16	MSTRG.20664	AABR07061052		19.7847	16.2141	18.8922	4.1683	4.39382	9.85854	2.97986	1.57525	up
GO:0006911	phagocytosis, engulfment	biological_process	8	6.66134e-16	MSTRG.24842	AABR07065651	immunoglobulin heavy constant mu [Source:MGI Symbol;Acc:MGI:96448];immunoglobulin heavy chain 6 [Source:RGD Symbol;Acc:1359202]	108.546	104.979	81.0806	35.3749	47.6802	61.9222	2.03209	1.02296	up
GO:0006911	phagocytosis, engulfment	biological_process	8	6.66134e-16	MSTRG.24859	AABR07065680		2.96264	2.2759	1.45705	0.29269	0.307458	0.985669	4.22217	2.07799	up
GO:0006911	phagocytosis, engulfment	biological_process	8	6.66134e-16	MSTRG.24860	AABR07065699		5.73906	5.87897	4.84134	1.00092	1.839	2.87945	2.87783	1.52498	up
GO:0006911	phagocytosis, engulfment	biological_process	8	6.66134e-16	MSTRG.24882	AABR07065768		9.43403	10.6966	8.4656	3.03992	5.42707	5.56363	2.03813	1.02724	up
GO:0006911	phagocytosis, engulfment	biological_process	8	6.66134e-16	MSTRG.24887	AABR07065773		2.90637	1.72005	2.2461	0.857586	0.24503	0.479708	4.34331	2.11879	up
GO:0006911	phagocytosis, engulfment	biological_process	8	6.66134e-16	MSTRG.24889	AABR07065776		33.2754	16.1599	20.8336	7.35006	12.1691	14.2925	2.07825	1.05537	up
GO:0006911	phagocytosis, engulfment	biological_process	8	6.66134e-16	MSTRG.24899	AABR07065778		11.0681	11.4278	6.57345	0.20535	1.37341	1.22297	10.3755	3.37511	up
GO:0006911	phagocytosis, engulfment	biological_process	8	6.66134e-16	MSTRG.24900	AABR07065778		6.4939	13.2788	7.98489	1.31441	3.30098	1.65139	4.42931	2.14708	up
GO:0006911	phagocytosis, engulfment	biological_process	8	6.66134e-16	MSTRG.24909	AABR07065789		23.8446	27.5019	19.3177	3.32875	7.16725	15.1861	2.75149	1.46021	up
GO:0006911	phagocytosis, engulfment	biological_process	8	6.66134e-16	MSTRG.24912	AABR07065792		1.2804	3.55437	2.90645	0.623334	1.05219	0.920162	2.98234	1.57645	up
GO:0006911	phagocytosis, engulfment	biological_process	8	6.66134e-16	MSTRG.24913	AABR07065792		9.59942	12.2116	9.00202	2.63187	3.51384	5.43137	2.66155	1.41227	up
GO:0006911	phagocytosis, engulfment	biological_process	8	6.66134e-16	MSTRG.24922	AABR07065815		9.87543	11.6914	10.6547	2.1312	3.303	3.01829	3.81209	1.93058	up
GO:0006911	phagocytosis, engulfment	biological_process	8	6.66134e-16	MSTRG.24923	AABR07065815		20.3781	19.5463	14.9096	5.12869	4.43258	6.95116	3.32077	1.73152	up
GO:0006911	phagocytosis, engulfment	biological_process	8	6.66134e-16	MSTRG.24925	AABR07065821		6.77149	3.60041	3.63694	1.29743	1.92793	3.73063	2.01393	1.01001	up
GO:0006911	phagocytosis, engulfment	biological_process	8	6.66134e-16	MSTRG.24926	AABR07065823		21.2107	20.5446	20.7454	6.36467	13.1749	11.4517	2.01672	1.01201	up
GO:0006911	phagocytosis, engulfment	biological_process	8	6.66134e-16	MSTRG.24928	AABR07065823		6.14731	5.89291	4.13689	1.68635	2.98877	2.29557	2.32073	1.21458	up
GO:0006911	phagocytosis, engulfment	biological_process	8	6.66134e-16	MSTRG.24937	AABR07065883		4.18487	5.03951	4.05627	1.63212	1.45598	1.83339	2.6985	1.43216	up
GO:0006911	phagocytosis, engulfment	biological_process	8	6.66134e-16	MSTRG.24940	AABR07065886		8.05455	7.5031	6.38153	3.07353	3.87735	2.99206	2.20651	1.14177	up
GO:0050871	positive regulation of B cell activation	biological_process	9	6.66134e-16	MSTRG.24842	AABR07065651	immunoglobulin heavy constant mu [Source:MGI Symbol;Acc:MGI:96448];immunoglobulin heavy chain 6 [Source:RGD Symbol;Acc:1359202]	108.546	104.979	81.0806	35.3749	47.6802	61.9222	2.03209	1.02296	up
GO:0050871	positive regulation of B cell activation	biological_process	9	6.66134e-16	MSTRG.24859	AABR07065680		2.96264	2.2759	1.45705	0.29269	0.307458	0.985669	4.22217	2.07799	up
GO:0050871	positive regulation of B cell activation	biological_process	9	6.66134e-16	MSTRG.24860	AABR07065699		5.73906	5.87897	4.84134	1.00092	1.839	2.87945	2.87783	1.52498	up
GO:0050871	positive regulation of B cell activation	biological_process	9	6.66134e-16	MSTRG.24882	AABR07065768		9.43403	10.6966	8.4656	3.03992	5.42707	5.56363	2.03813	1.02724	up
GO:0050871	positive regulation of B cell activation	biological_process	9	6.66134e-16	MSTRG.24887	AABR07065773		2.90637	1.72005	2.2461	0.857586	0.24503	0.479708	4.34331	2.11879	up
GO:0050871	positive regulation of B cell activation	biological_process	9	6.66134e-16	MSTRG.24889	AABR07065776		33.2754	16.1599	20.8336	7.35006	12.1691	14.2925	2.07825	1.05537	up
GO:0050871	positive regulation of B cell activation	biological_process	9	6.66134e-16	MSTRG.24899	AABR07065778		11.0681	11.4278	6.57345	0.20535	1.37341	1.22297	10.3755	3.37511	up
GO:0050871	positive regulation of B cell activation	biological_process	9	6.66134e-16	MSTRG.24900	AABR07065778		6.4939	13.2788	7.98489	1.31441	3.30098	1.65139	4.42931	2.14708	up
GO:0050871	positive regulation of B cell activation	biological_process	9	6.66134e-16	MSTRG.24909	AABR07065789		23.8446	27.5019	19.3177	3.32875	7.16725	15.1861	2.75149	1.46021	up
GO:0050871	positive regulation of B cell activation	biological_process	9	6.66134e-16	MSTRG.24912	AABR07065792		1.2804	3.55437	2.90645	0.623334	1.05219	0.920162	2.98234	1.57645	up
GO:0050871	positive regulation of B cell activation	biological_process	9	6.66134e-16	MSTRG.24913	AABR07065792		9.59942	12.2116	9.00202	2.63187	3.51384	5.43137	2.66155	1.41227	up
GO:0050871	positive regulation of B cell activation	biological_process	9	6.66134e-16	MSTRG.24922	AABR07065815		9.87543	11.6914	10.6547	2.1312	3.303	3.01829	3.81209	1.93058	up
GO:0050871	positive regulation of B cell activation	biological_process	9	6.66134e-16	MSTRG.24923	AABR07065815		20.3781	19.5463	14.9096	5.12869	4.43258	6.95116	3.32077	1.73152	up
GO:0050871	positive regulation of B cell activation	biological_process	9	6.66134e-16	MSTRG.24925	AABR07065821		6.77149	3.60041	3.63694	1.29743	1.92793	3.73063	2.01393	1.01001	up
GO:0050871	positive regulation of B cell activation	biological_process	9	6.66134e-16	MSTRG.24926	AABR07065823		21.2107	20.5446	20.7454	6.36467	13.1749	11.4517	2.01672	1.01201	up
GO:0050871	positive regulation of B cell activation	biological_process	9	6.66134e-16	MSTRG.24928	AABR07065823		6.14731	5.89291	4.13689	1.68635	2.98877	2.29557	2.32073	1.21458	up
GO:0050871	positive regulation of B cell activation	biological_process	9	6.66134e-16	MSTRG.24937	AABR07065883		4.18487	5.03951	4.05627	1.63212	1.45598	1.83339	2.6985	1.43216	up
GO:0050871	positive regulation of B cell activation	biological_process	9	6.66134e-16	MSTRG.24940	AABR07065886		8.05455	7.5031	6.38153	3.07353	3.87735	2.99206	2.20651	1.14177	up
GO:0009897	external side of plasma membrane	cellular_component	5	1.58762e-13	ENSRNOG00000020872	Cd5	Cd5 molecule [Source:RGD Symbol;Acc:2309]	0.577905	0.540254	0.25983	0.0973373	0.177983	0.267674	2.53776	1.34356	up
GO:0009897	external side of plasma membrane	cellular_component	5	1.58762e-13	MSTRG.21375	Klrk1	killer cell lectin like receptor K1 [Source:RGD Symbol;Acc:3180]	3.23628	1.16965	1.88792	0.905104	0.662451	1.16837	2.30045	1.20191	up
GO:0009897	external side of plasma membrane	cellular_component	5	1.58762e-13	MSTRG.24842	AABR07065651	immunoglobulin heavy constant mu [Source:MGI Symbol;Acc:MGI:96448];immunoglobulin heavy chain 6 [Source:RGD Symbol;Acc:1359202]	108.546	104.979	81.0806	35.3749	47.6802	61.9222	2.03209	1.02296	up
GO:0009897	external side of plasma membrane	cellular_component	5	1.58762e-13	MSTRG.24859	AABR07065680		2.96264	2.2759	1.45705	0.29269	0.307458	0.985669	4.22217	2.07799	up
GO:0009897	external side of plasma membrane	cellular_component	5	1.58762e-13	MSTRG.24860	AABR07065699		5.73906	5.87897	4.84134	1.00092	1.839	2.87945	2.87783	1.52498	up
GO:0009897	external side of plasma membrane	cellular_component	5	1.58762e-13	MSTRG.24882	AABR07065768		9.43403	10.6966	8.4656	3.03992	5.42707	5.56363	2.03813	1.02724	up
GO:0009897	external side of plasma membrane	cellular_component	5	1.58762e-13	MSTRG.24887	AABR07065773		2.90637	1.72005	2.2461	0.857586	0.24503	0.479708	4.34331	2.11879	up
GO:0009897	external side of plasma membrane	cellular_component	5	1.58762e-13	MSTRG.24889	AABR07065776		33.2754	16.1599	20.8336	7.35006	12.1691	14.2925	2.07825	1.05537	up
GO:0009897	external side of plasma membrane	cellular_component	5	1.58762e-13	MSTRG.24899	AABR07065778		11.0681	11.4278	6.57345	0.20535	1.37341	1.22297	10.3755	3.37511	up
GO:0009897	external side of plasma membrane	cellular_component	5	1.58762e-13	MSTRG.24900	AABR07065778		6.4939	13.2788	7.98489	1.31441	3.30098	1.65139	4.42931	2.14708	up
GO:0009897	external side of plasma membrane	cellular_component	5	1.58762e-13	MSTRG.24909	AABR07065789		23.8446	27.5019	19.3177	3.32875	7.16725	15.1861	2.75149	1.46021	up
GO:0009897	external side of plasma membrane	cellular_component	5	1.58762e-13	MSTRG.24912	AABR07065792		1.2804	3.55437	2.90645	0.623334	1.05219	0.920162	2.98234	1.57645	up
GO:0009897	external side of plasma membrane	cellular_component	5	1.58762e-13	MSTRG.24913	AABR07065792		9.59942	12.2116	9.00202	2.63187	3.51384	5.43137	2.66155	1.41227	up
GO:0009897	external side of plasma membrane	cellular_component	5	1.58762e-13	MSTRG.24922	AABR07065815		9.87543	11.6914	10.6547	2.1312	3.303	3.01829	3.81209	1.93058	up
GO:0009897	external side of plasma membrane	cellular_component	5	1.58762e-13	MSTRG.24923	AABR07065815		20.3781	19.5463	14.9096	5.12869	4.43258	6.95116	3.32077	1.73152	up
GO:0009897	external side of plasma membrane	cellular_component	5	1.58762e-13	MSTRG.24925	AABR07065821		6.77149	3.60041	3.63694	1.29743	1.92793	3.73063	2.01393	1.01001	up
GO:0009897	external side of plasma membrane	cellular_component	5	1.58762e-13	MSTRG.24926	AABR07065823		21.2107	20.5446	20.7454	6.36467	13.1749	11.4517	2.01672	1.01201	up
GO:0009897	external side of plasma membrane	cellular_component	5	1.58762e-13	MSTRG.24928	AABR07065823		6.14731	5.89291	4.13689	1.68635	2.98877	2.29557	2.32073	1.21458	up
GO:0009897	external side of plasma membrane	cellular_component	5	1.58762e-13	MSTRG.24937	AABR07065883		4.18487	5.03951	4.05627	1.63212	1.45598	1.83339	2.6985	1.43216	up
GO:0009897	external side of plasma membrane	cellular_component	5	1.58762e-13	MSTRG.24940	AABR07065886		8.05455	7.5031	6.38153	3.07353	3.87735	2.99206	2.20651	1.14177	up
GO:0009897	external side of plasma membrane	cellular_component	5	1.58762e-13	MSTRG.26142	Gpihbp1	glycosylphosphatidylinositol anchored high density lipoprotein binding protein 1 [Source:RGD Symbol;Acc:1564237]	2.63219	2.08795	1.30847	0.676363	0.879262	1.01499	2.3452	1.22971	up
GO:0009897	external side of plasma membrane	cellular_component	5	1.58762e-13	MSTRG.8909	Slamf7	SLAM family member 7 [Source:RGD Symbol;Acc:1560190]	2.04248	2.26062	1.47931	0.51249	0.624687	1.37511	2.30165	1.20267	up
GO:0005861	troponin complex	cellular_component	4	2.85396e-05	ENSRNOG00000009073	Tnni1	troponin I1, slow skeletal type [Source:RGD Symbol;Acc:621765]	0.0001	0.320189	0.111562	1.30183	0.916524	0.423642	0.163456	-2.61302	down
GO:0005861	troponin complex	cellular_component	4	2.85396e-05	MSTRG.1771	Tnni3	dynein, axonemal, assembly factor 3 [Source:RGD Symbol;Acc:2323487];troponin I3, cardiac type [Source:RGD Symbol;Acc:62052]	0.232226	0.361112	0.142345	0.656005	0.490498	0.460709	0.457739	-1.1274	down
GO:0005861	troponin complex	cellular_component	4	2.85396e-05	MSTRG.1772	Tnnt1	troponin T1, slow skeletal type [Source:RGD Symbol;Acc:621852]	0.431625	0.589243	0.648615	2.42819	2.30412	1.00538	0.290968	-1.78107	down
GO:0014883	transition between fast and slow fiber	biological_process	8	2.85396e-05	ENSRNOG00000009073	Tnni1	troponin I1, slow skeletal type [Source:RGD Symbol;Acc:621765]	0.0001	0.320189	0.111562	1.30183	0.916524	0.423642	0.163456	-2.61302	down
GO:0014883	transition between fast and slow fiber	biological_process	8	2.85396e-05	MSTRG.10649	Myh6	myosin heavy chain 7 [Source:RGD Symbol;Acc:62030];myosin heavy chain 6 [Source:RGD Symbol;Acc:62029]	0.997238	1.06135	0.328905	1.69535	2.31046	1.00868	0.476118	-1.07061	down
GO:0014883	transition between fast and slow fiber	biological_process	8	2.85396e-05	MSTRG.1772	Tnnt1	troponin T1, slow skeletal type [Source:RGD Symbol;Acc:621852]	0.431625	0.589243	0.648615	2.42819	2.30412	1.00538	0.290968	-1.78107	down
GO:0071756	pentameric IgM immunoglobulin complex	cellular_component	7	5.00658e-05	MSTRG.24842	AABR07065651	immunoglobulin heavy constant mu [Source:MGI Symbol;Acc:MGI:96448];immunoglobulin heavy chain 6 [Source:RGD Symbol;Acc:1359202]	108.546	104.979	81.0806	35.3749	47.6802	61.9222	2.03209	1.02296	up
GO:0071756	pentameric IgM immunoglobulin complex	cellular_component	7	5.00658e-05	MSTRG.9426	Jchain	joining chain of multimeric IgA and IgM [Source:RGD Symbol;Acc:1310155]	132.362	133.248	97.0823	41.2594	54.0119	70.3597	2.18976	1.13077	up
GO:0045214	sarcomere organization	biological_process	9	0.000107553	ENSRNOG00000014815	Myoz2	myozenin 2 [Source:RGD Symbol;Acc:1307669]	0.089599	0.566478	0.085301	1.18754	1.33308	0.76693	0.225511	-2.14873	down
GO:0045214	sarcomere organization	biological_process	9	0.000107553	ENSRNOG00000018480	Capn9	calpain 9 [Source:RGD Symbol;Acc:70965]	0.16122	0.105673	0.226045	0.394335	0.248195	0.41808	0.464768	-1.10542	down
GO:0045214	sarcomere organization	biological_process	9	0.000107553	MSTRG.10649	Myh6	myosin heavy chain 7 [Source:RGD Symbol;Acc:62030];myosin heavy chain 6 [Source:RGD Symbol;Acc:62029]	0.997238	1.06135	0.328905	1.69535	2.31046	1.00868	0.476118	-1.07061	down
GO:0045214	sarcomere organization	biological_process	9	0.000107553	MSTRG.1772	Tnnt1	troponin T1, slow skeletal type [Source:RGD Symbol;Acc:621852]	0.431625	0.589243	0.648615	2.42819	2.30412	1.00538	0.290968	-1.78107	down
GO:0006936	muscle contraction	biological_process	6	0.000315523	ENSRNOG00000032994	Myom3	myomesin 3 [Source:RGD Symbol;Acc:1310060]	0.440899	0.27448	0.374804	1.15099	1.0828	0.623768	0.381508	-1.39021	down
GO:0006936	muscle contraction	biological_process	6	0.000315523	MSTRG.10649	Myh6	myosin heavy chain 7 [Source:RGD Symbol;Acc:62030];myosin heavy chain 6 [Source:RGD Symbol;Acc:62029]	0.997238	1.06135	0.328905	1.69535	2.31046	1.00868	0.476118	-1.07061	down
GO:0006936	muscle contraction	biological_process	6	0.000315523	MSTRG.1771	Tnni3	dynein, axonemal, assembly factor 3 [Source:RGD Symbol;Acc:2323487];troponin I3, cardiac type [Source:RGD Symbol;Acc:62052]	0.232226	0.361112	0.142345	0.656005	0.490498	0.460709	0.457739	-1.1274	down
GO:0006936	muscle contraction	biological_process	6	0.000315523	MSTRG.1772	Tnnt1	troponin T1, slow skeletal type [Source:RGD Symbol;Acc:621852]	0.431625	0.589243	0.648615	2.42819	2.30412	1.00538	0.290968	-1.78107	down
GO:0060048	cardiac muscle contraction	biological_process	8	0.000402975	MSTRG.10649	Myh6	myosin heavy chain 7 [Source:RGD Symbol;Acc:62030];myosin heavy chain 6 [Source:RGD Symbol;Acc:62029]	0.997238	1.06135	0.328905	1.69535	2.31046	1.00868	0.476118	-1.07061	down
GO:0060048	cardiac muscle contraction	biological_process	8	0.000402975	MSTRG.1771	Tnni3	dynein, axonemal, assembly factor 3 [Source:RGD Symbol;Acc:2323487];troponin I3, cardiac type [Source:RGD Symbol;Acc:62052]	0.232226	0.361112	0.142345	0.656005	0.490498	0.460709	0.457739	-1.1274	down
GO:0060048	cardiac muscle contraction	biological_process	8	0.000402975	MSTRG.1772	Tnnt1	troponin T1, slow skeletal type [Source:RGD Symbol;Acc:621852]	0.431625	0.589243	0.648615	2.42819	2.30412	1.00538	0.290968	-1.78107	down
GO:0060048	cardiac muscle contraction	biological_process	8	0.000402975	MSTRG.2394	Csrp3	cysteine and glycine rich protein 3 [Source:RGD Symbol;Acc:71092]	0.636871	1.03978	0.697614	1.76671	2.35583	1.56165	0.417697	-1.25947	down
GO:0034463	90S preribosome assembly	biological_process	9	0.000493683	MSTRG.11358	LOC690468	similar to 60S ribosomal protein L38 [Source:RGD Symbol;Acc:1596041]	8.73527	23.9417	6.2189	7.9823	2.56257	2.99969	2.8717	1.5219	up
GO:0034463	90S preribosome assembly	biological_process	9	0.000493683	MSTRG.16301	LOC685963	similar to 60S ribosomal protein L38 [Source:RGD Symbol;Acc:1587812]	9.62033	24.8426	7.96908	8.04825	3.22774	4.20371	2.74114	1.45478	up
GO:0031014	troponin T binding	molecular_function	6	0.000493683	MSTRG.1771	Tnni3	dynein, axonemal, assembly factor 3 [Source:RGD Symbol;Acc:2323487];troponin I3, cardiac type [Source:RGD Symbol;Acc:62052]	0.232226	0.361112	0.142345	0.656005	0.490498	0.460709	0.457739	-1.1274	down
GO:0031014	troponin T binding	molecular_function	6	0.000493683	MSTRG.1772	Tnnt1	troponin T1, slow skeletal type [Source:RGD Symbol;Acc:621852]	0.431625	0.589243	0.648615	2.42819	2.30412	1.00538	0.290968	-1.78107	down
GO:0033291	eukaryotic 80S initiation complex	cellular_component	7	0.000493683	MSTRG.11358	LOC690468	similar to 60S ribosomal protein L38 [Source:RGD Symbol;Acc:1596041]	8.73527	23.9417	6.2189	7.9823	2.56257	2.99969	2.8717	1.5219	up
GO:0033291	eukaryotic 80S initiation complex	cellular_component	7	0.000493683	MSTRG.16301	LOC685963	similar to 60S ribosomal protein L38 [Source:RGD Symbol;Acc:1587812]	9.62033	24.8426	7.96908	8.04825	3.22774	4.20371	2.74114	1.45478	up
GO:0042288	MHC class I protein binding	molecular_function	7	0.000559399	MSTRG.21375	Klrk1	killer cell lectin like receptor K1 [Source:RGD Symbol;Acc:3180]	3.23628	1.16965	1.88792	0.905104	0.662451	1.16837	2.30045	1.20191	up
GO:0042288	MHC class I protein binding	molecular_function	7	0.000559399	MSTRG.7662	RGD1559588	similar to cell surface receptor FDFACT [Source:RGD Symbol;Acc:1559588]	2.91778	1.32373	1.30772	0.583019	0.845388	1.05497	2.23455	1.15998	up
GO:0042288	MHC class I protein binding	molecular_function	7	0.000559399	MSTRG.7674	LOC108348155	paired immunoglobulin-like type 2 receptor beta-2 [Source:RGD Symbol;Acc:11434352]	0.658351	0.227604	0.106371	0.529998	0.785693	1.00858	0.426941	-1.22789	down
GO:0055010	ventricular cardiac muscle tissue morphogenesis	biological_process	8	0.000718983	ENSRNOG00000009073	Tnni1	troponin I1, slow skeletal type [Source:RGD Symbol;Acc:621765]	0.0001	0.320189	0.111562	1.30183	0.916524	0.423642	0.163456	-2.61302	down
GO:0055010	ventricular cardiac muscle tissue morphogenesis	biological_process	8	0.000718983	MSTRG.10649	Myh6	myosin heavy chain 7 [Source:RGD Symbol;Acc:62030];myosin heavy chain 6 [Source:RGD Symbol;Acc:62029]	0.997238	1.06135	0.328905	1.69535	2.31046	1.00868	0.476118	-1.07061	down
GO:0055010	ventricular cardiac muscle tissue morphogenesis	biological_process	8	0.000718983	MSTRG.1771	Tnni3	dynein, axonemal, assembly factor 3 [Source:RGD Symbol;Acc:2323487];troponin I3, cardiac type [Source:RGD Symbol;Acc:62052]	0.232226	0.361112	0.142345	0.656005	0.490498	0.460709	0.457739	-1.1274	down
GO:1903208	negative regulation of hydrogen peroxide-induced neuron death	biological_process	10	0.000737073	ENSRNOG00000005964	Nr4a3	nuclear receptor subfamily 4, group A, member 3 [Source:RGD Symbol;Acc:61882]	0.829097	0.535612	0.350647	0.270902	0.310903	0.258833	2.04054	1.02895	up
GO:1903208	negative regulation of hydrogen peroxide-induced neuron death	biological_process	10	0.000737073	MSTRG.7866	Rack1	receptor for activated C kinase 1 [Source:RGD Symbol;Acc:69229]	2.12116	1.74372	0.700888	3.26988	5.21372	1.65053	0.450533	-1.15029	down
GO:0031433	telethonin binding	molecular_function	6	0.000737073	ENSRNOG00000014815	Myoz2	myozenin 2 [Source:RGD Symbol;Acc:1307669]	0.089599	0.566478	0.085301	1.18754	1.33308	0.76693	0.225511	-2.14873	down
GO:0031433	telethonin binding	molecular_function	6	0.000737073	MSTRG.2394	Csrp3	cysteine and glycine rich protein 3 [Source:RGD Symbol;Acc:71092]	0.636871	1.03978	0.697614	1.76671	2.35583	1.56165	0.417697	-1.25947	down
GO:0097512	cardiac myofibril	cellular_component	8	0.0010271	MSTRG.1771	Tnni3	dynein, axonemal, assembly factor 3 [Source:RGD Symbol;Acc:2323487];troponin I3, cardiac type [Source:RGD Symbol;Acc:62052]	0.232226	0.361112	0.142345	0.656005	0.490498	0.460709	0.457739	-1.1274	down
GO:0097512	cardiac myofibril	cellular_component	8	0.0010271	MSTRG.27342	Cryab	crystallin, alpha B [Source:RGD Symbol;Acc:2414]	4.40167	3.16475	1.93664	6.6383	11.8965	6.47058	0.380041	-1.39577	down
GO:0003009	skeletal muscle contraction	biological_process	8	0.00123666	MSTRG.10649	Myh6	myosin heavy chain 7 [Source:RGD Symbol;Acc:62030];myosin heavy chain 6 [Source:RGD Symbol;Acc:62029]	0.997238	1.06135	0.328905	1.69535	2.31046	1.00868	0.476118	-1.07061	down
GO:0003009	skeletal muscle contraction	biological_process	8	0.00123666	MSTRG.1771	Tnni3	dynein, axonemal, assembly factor 3 [Source:RGD Symbol;Acc:2323487];troponin I3, cardiac type [Source:RGD Symbol;Acc:62052]	0.232226	0.361112	0.142345	0.656005	0.490498	0.460709	0.457739	-1.1274	down
GO:0003009	skeletal muscle contraction	biological_process	8	0.00123666	MSTRG.1772	Tnnt1	troponin T1, slow skeletal type [Source:RGD Symbol;Acc:621852]	0.431625	0.589243	0.648615	2.42819	2.30412	1.00538	0.290968	-1.78107	down
GO:0015935	small ribosomal subunit	cellular_component	7	0.00139577	MSTRG.23291	LOC100362149	ribosomal protein S20-like [Source:RGD Symbol;Acc:2318734]	5.17524	3.97197	5.25486	4.70844	14.5374	10.2089	0.488957	-1.03222	down
GO:0015935	small ribosomal subunit	cellular_component	7	0.00139577	MSTRG.28226	AABR07071482		0.81612	0.929613	0.839154	2.29921	1.63257	2.67258	0.391391	-1.35332	down
GO:0015935	small ribosomal subunit	cellular_component	7	0.00139577	MSTRG.28488	LOC100362684	ribosomal protein S20-like [Source:RGD Symbol;Acc:2324274]	4.34034	18.8852	4.45946	4.11471	2.30514	4.54696	2.52444	1.33596	up
GO:0015935	small ribosomal subunit	cellular_component	7	0.00139577	MSTRG.7866	Rack1	receptor for activated C kinase 1 [Source:RGD Symbol;Acc:69229]	2.12116	1.74372	0.700888	3.26988	5.21372	1.65053	0.450533	-1.15029	down
GO:0048318	axial mesoderm development	biological_process	7	0.00174439	MSTRG.11358	LOC690468	similar to 60S ribosomal protein L38 [Source:RGD Symbol;Acc:1596041]	8.73527	23.9417	6.2189	7.9823	2.56257	2.99969	2.8717	1.5219	up
GO:0048318	axial mesoderm development	biological_process	7	0.00174439	MSTRG.16301	LOC685963	similar to 60S ribosomal protein L38 [Source:RGD Symbol;Acc:1587812]	9.62033	24.8426	7.96908	8.04825	3.22774	4.20371	2.74114	1.45478	up
GO:0006941	striated muscle contraction	biological_process	7	0.00264031	MSTRG.10649	Myh6	myosin heavy chain 7 [Source:RGD Symbol;Acc:62030];myosin heavy chain 6 [Source:RGD Symbol;Acc:62029]	0.997238	1.06135	0.328905	1.69535	2.31046	1.00868	0.476118	-1.07061	down
GO:0006941	striated muscle contraction	biological_process	7	0.00264031	MSTRG.1771	Tnni3	dynein, axonemal, assembly factor 3 [Source:RGD Symbol;Acc:2323487];troponin I3, cardiac type [Source:RGD Symbol;Acc:62052]	0.232226	0.361112	0.142345	0.656005	0.490498	0.460709	0.457739	-1.1274	down
GO:0022618	ribonucleoprotein complex assembly	biological_process	8	0.00264031	MSTRG.11358	LOC690468	similar to 60S ribosomal protein L38 [Source:RGD Symbol;Acc:1596041]	8.73527	23.9417	6.2189	7.9823	2.56257	2.99969	2.8717	1.5219	up
GO:0022618	ribonucleoprotein complex assembly	biological_process	8	0.00264031	MSTRG.16301	LOC685963	similar to 60S ribosomal protein L38 [Source:RGD Symbol;Acc:1587812]	9.62033	24.8426	7.96908	8.04825	3.22774	4.20371	2.74114	1.45478	up
GO:0050829	defense response to Gram-negative bacterium	biological_process	9	0.00277711	MSTRG.10586	Rnase6	ribonuclease A family member k6 [Source:RGD Symbol;Acc:1303020]	2.74194	2.3303	1.68547	1.0146	0.903928	1.33617	2.0763	1.05401	up
GO:0050829	defense response to Gram-negative bacterium	biological_process	9	0.00277711	MSTRG.1247	RGD1559962	similar to High mobility group protein 2 (HMG-2) [Source:RGD Symbol;Acc:1559962]	2.0089	1.58098	1.57628	1.87562	4.21377	5.19355	0.457874	-1.12698	down
GO:0050829	defense response to Gram-negative bacterium	biological_process	9	0.00277711	MSTRG.24842	AABR07065651	immunoglobulin heavy constant mu [Source:MGI Symbol;Acc:MGI:96448];immunoglobulin heavy chain 6 [Source:RGD Symbol;Acc:1359202]	108.546	104.979	81.0806	35.3749	47.6802	61.9222	2.03209	1.02296	up
GO:0050829	defense response to Gram-negative bacterium	biological_process	9	0.00277711	MSTRG.25663	Lyc2	lysozyme C type 2 [Source:RGD Symbol;Acc:1593616]	41.8054	26.3828	18.9251	18.5648	14.441	7.07027	2.1737	1.12015	up
GO:0002250	adaptive immune response	biological_process	5	0.00373171	MSTRG.21375	Klrk1	killer cell lectin like receptor K1 [Source:RGD Symbol;Acc:3180]	3.23628	1.16965	1.88792	0.905104	0.662451	1.16837	2.30045	1.20191	up
GO:0002250	adaptive immune response	biological_process	5	0.00373171	MSTRG.24842	AABR07065651	immunoglobulin heavy constant mu [Source:MGI Symbol;Acc:MGI:96448];immunoglobulin heavy chain 6 [Source:RGD Symbol;Acc:1359202]	108.546	104.979	81.0806	35.3749	47.6802	61.9222	2.03209	1.02296	up
GO:0002250	adaptive immune response	biological_process	5	0.00373171	MSTRG.27243	Cd3g	CD3g molecule [Source:RGD Symbol;Acc:1307718]	3.1597	3.36923	1.43494	0.802837	0.611571	1.27998	2.95572	1.56351	up
GO:0002250	adaptive immune response	biological_process	5	0.00373171	MSTRG.9426	Jchain	joining chain of multimeric IgA and IgM [Source:RGD Symbol;Acc:1310155]	132.362	133.248	97.0823	41.2594	54.0119	70.3597	2.18976	1.13077	up
GO:0040008	regulation of growth	biological_process	5	0.00425659	MSTRG.29376	Igfbp2	insulin-like growth factor binding protein 2 [Source:RGD Symbol;Acc:2873]	0.073613	0.214964	0.510057	2.1311	1.26299	0.635682	0.198184	-2.33509	down
GO:0040008	regulation of growth	biological_process	5	0.00425659	MSTRG.752	Morf4l2	mortality factor 4 like 2 [Source:RGD Symbol;Acc:1359471]	68.6344	76.9306	75.8236	18.1591	17.1081	17.1627	4.22256	2.07812	up
GO:0040008	regulation of growth	biological_process	5	0.00425659	MSTRG.7866	Rack1	receptor for activated C kinase 1 [Source:RGD Symbol;Acc:69229]	2.12116	1.74372	0.700888	3.26988	5.21372	1.65053	0.450533	-1.15029	down
GO:0042834	peptidoglycan binding	molecular_function	6	0.00430796	MSTRG.24842	AABR07065651	immunoglobulin heavy constant mu [Source:MGI Symbol;Acc:MGI:96448];immunoglobulin heavy chain 6 [Source:RGD Symbol;Acc:1359202]	108.546	104.979	81.0806	35.3749	47.6802	61.9222	2.03209	1.02296	up
GO:0042834	peptidoglycan binding	molecular_function	6	0.00430796	MSTRG.9426	Jchain	joining chain of multimeric IgA and IgM [Source:RGD Symbol;Acc:1310155]	132.362	133.248	97.0823	41.2594	54.0119	70.3597	2.18976	1.13077	up
GO:0006937	regulation of muscle contraction	biological_process	8	0.00562827	MSTRG.1771	Tnni3	dynein, axonemal, assembly factor 3 [Source:RGD Symbol;Acc:2323487];troponin I3, cardiac type [Source:RGD Symbol;Acc:62052]	0.232226	0.361112	0.142345	0.656005	0.490498	0.460709	0.457739	-1.1274	down
GO:0006937	regulation of muscle contraction	biological_process	8	0.00562827	MSTRG.1772	Tnnt1	troponin T1, slow skeletal type [Source:RGD Symbol;Acc:621852]	0.431625	0.589243	0.648615	2.42819	2.30412	1.00538	0.290968	-1.78107	down
GO:0042026	protein refolding	biological_process	5	0.00562827	MSTRG.17011	Hspa1b	heat shock protein family A (Hsp70) member 1B [Source:RGD Symbol;Acc:2840]	5.24329	5.52474	2.7742	7.21687	11.7813	14.7747	0.40098	-1.3184	down
GO:0042026	protein refolding	biological_process	5	0.00562827	MSTRG.6522	LOC680121	similar to heat shock protein 8 [Source:RGD Symbol;Acc:1595502]	30.1405	38.296	22.6258	32.113	23.1973	149.677	0.444234	-1.17061	down
GO:1901346	negative regulation of vasculature development involved in avascular cornea development in camera-type eye	biological_process	8	0.00710024	MSTRG.23343	Angptl7	angiopoietin like 7 [Source:RGD Symbol;Acc:7553363]	7.81835	7.9259	4.33571	2.35398	2.94155	2.14646	2.6982	1.432	up
GO:0061772	xenobiotic transport across blood-nerve barrier	biological_process	7	0.00710024	ENSRNOG00000001926	Cldn1	claudin 1 [Source:RGD Symbol;Acc:68422]	0.488957	0.588734	0.237891	0.155539	0.268818	0.188699	2.14594	1.10161	up
GO:2000108	positive regulation of leukocyte apoptotic process	biological_process	10	0.00710024	ENSRNOG00000005964	Nr4a3	nuclear receptor subfamily 4, group A, member 3 [Source:RGD Symbol;Acc:61882]	0.829097	0.535612	0.350647	0.270902	0.310903	0.258833	2.04054	1.02895	up
GO:0019341	dibenzo-p-dioxin catabolic process	biological_process	7	0.00710024	ENSRNOG00000019500	Cyp1a1	cytochrome P450, family 1, subfamily a, polypeptide 1 [Source:RGD Symbol;Acc:2458]	0.03592	0.0001	0.081544	0.280251	0.378238	0.727885	0.0847996	-3.5598	down
GO:0031449	regulation of slow-twitch skeletal muscle fiber contraction	biological_process	12	0.00710024	MSTRG.10649	Myh6	myosin heavy chain 7 [Source:RGD Symbol;Acc:62030];myosin heavy chain 6 [Source:RGD Symbol;Acc:62029]	0.997238	1.06135	0.328905	1.69535	2.31046	1.00868	0.476118	-1.07061	down
GO:2000590	negative regulation of metanephric mesenchymal cell migration	biological_process	9	0.00710024	MSTRG.7077	Adipoq	adiponectin, C1Q and collagen domain containing [Source:RGD Symbol;Acc:628748]	1.56388	0.891889	1.23395	0.20421	0.211193	0.290087	5.23001	2.38681	up
GO:0034127	regulation of MyD88-independent toll-like receptor signaling pathway	biological_process	9	0.00710024	MSTRG.3425	Irf7	interferon regulatory factor 7 [Source:RGD Symbol;Acc:1307828]	3.76225	5.28163	2.92289	1.06032	1.17443	1.60451	3.11694	1.64013	up
GO:0033034	positive regulation of myeloid cell apoptotic process	biological_process	10	0.00710024	MSTRG.7077	Adipoq	adiponectin, C1Q and collagen domain containing [Source:RGD Symbol;Acc:628748]	1.56388	0.891889	1.23395	0.20421	0.211193	0.290087	5.23001	2.38681	up
GO:1903545	cellular response to butyrate	biological_process	8	0.00710024	ENSRNOG00000001926	Cldn1	claudin 1 [Source:RGD Symbol;Acc:68422]	0.488957	0.588734	0.237891	0.155539	0.268818	0.188699	2.14594	1.10161	up
GO:0038097	positive regulation of mast cell activation by Fc-epsilon receptor signaling pathway	biological_process	8	0.00710024	ENSRNOG00000005964	Nr4a3	nuclear receptor subfamily 4, group A, member 3 [Source:RGD Symbol;Acc:61882]	0.829097	0.535612	0.350647	0.270902	0.310903	0.258833	2.04054	1.02895	up
GO:0070994	detection of oxidative stress	biological_process	6	0.00710024	MSTRG.7077	Adipoq	adiponectin, C1Q and collagen domain containing [Source:RGD Symbol;Acc:628748]	1.56388	0.891889	1.23395	0.20421	0.211193	0.290087	5.23001	2.38681	up
GO:0102555	octanoyl transferase activity (acting on glycine-cleavage complex H protein	molecular_function	8	0.00710024	MSTRG.2812	Lipt2	lipoyl(octanoyl) transferase 2 [Source:RGD Symbol;Acc:1305211]	0.283157	0.506009	0.480529	0.88151	1.24304	0.745033	0.442466	-1.17636	down
GO:0120003	hinge region between urothelial plaques of apical plasma membrane	cellular_component	5	0.00710024	MSTRG.19016	Mal	mal, T-cell differentiation protein [Source:RGD Symbol;Acc:3037]	1.70514	1.76004	1.8063	0.88808	0.918323	0.823618	2.00435	1.00314	up
GO:0004996	thyroid-stimulating hormone receptor activity	molecular_function	7	0.00710024	ENSRNOG00000003972	Tshr	thyroid stimulating hormone receptor [Source:RGD Symbol;Acc:3911]	0.489374	0.184589	0.289544	0.094947	0.190353	0.167872	2.12614	1.08824	up
GO:0071751	secretory IgA immunoglobulin complex	cellular_component	8	0.00710024	MSTRG.9426	Jchain	joining chain of multimeric IgA and IgM [Source:RGD Symbol;Acc:1310155]	132.362	133.248	97.0823	41.2594	54.0119	70.3597	2.18976	1.13077	up
GO:0009444	pyruvate oxidation	biological_process	10	0.00710024	ENSRNOG00000005964	Nr4a3	nuclear receptor subfamily 4, group A, member 3 [Source:RGD Symbol;Acc:61882]	0.829097	0.535612	0.350647	0.270902	0.310903	0.258833	2.04054	1.02895	up
GO:0071748	monomeric IgA immunoglobulin complex	cellular_component	7	0.00710024	MSTRG.9426	Jchain	joining chain of multimeric IgA and IgM [Source:RGD Symbol;Acc:1310155]	132.362	133.248	97.0823	41.2594	54.0119	70.3597	2.18976	1.13077	up
GO:0033819	lipoyl(octanoyl) transferase activity	molecular_function	7	0.00710024	MSTRG.2812	Lipt2	lipoyl(octanoyl) transferase 2 [Source:RGD Symbol;Acc:1305211]	0.283157	0.506009	0.480529	0.88151	1.24304	0.745033	0.442466	-1.17636	down
GO:0038194	thyroid-stimulating hormone signaling pathway	biological_process	6	0.00710024	ENSRNOG00000003972	Tshr	thyroid stimulating hormone receptor [Source:RGD Symbol;Acc:3911]	0.489374	0.184589	0.289544	0.094947	0.190353	0.167872	2.12614	1.08824	up
GO:0016415	octanoyltransferase activity	molecular_function	7	0.00710024	MSTRG.2812	Lipt2	lipoyl(octanoyl) transferase 2 [Source:RGD Symbol;Acc:1305211]	0.283157	0.506009	0.480529	0.88151	1.24304	0.745033	0.442466	-1.17636	down
GO:0071752	secretory dimeric IgA immunoglobulin complex	cellular_component	9	0.00710024	MSTRG.9426	Jchain	joining chain of multimeric IgA and IgM [Source:RGD Symbol;Acc:1310155]	132.362	133.248	97.0823	41.2594	54.0119	70.3597	2.18976	1.13077	up
GO:0090321	positive regulation of chylomicron remnant clearance	biological_process	8	0.00710024	MSTRG.26142	Gpihbp1	glycosylphosphatidylinositol anchored high density lipoprotein binding protein 1 [Source:RGD Symbol;Acc:1564237]	2.63219	2.08795	1.30847	0.676363	0.879262	1.01499	2.3452	1.22971	up
GO:0071750	dimeric IgA immunoglobulin complex	cellular_component	8	0.00710024	MSTRG.9426	Jchain	joining chain of multimeric IgA and IgM [Source:RGD Symbol;Acc:1310155]	132.362	133.248	97.0823	41.2594	54.0119	70.3597	2.18976	1.13077	up
GO:0031109	microtubule polymerization or depolymerization	biological_process	8	0.00710024	MSTRG.27342	Cryab	crystallin, alpha B [Source:RGD Symbol;Acc:2414]	4.40167	3.16475	1.93664	6.6383	11.8965	6.47058	0.380041	-1.39577	down
GO:0090317	negative regulation of intracellular protein transport	biological_process	9	0.00710024	MSTRG.7077	Adipoq	adiponectin, C1Q and collagen domain containing [Source:RGD Symbol;Acc:628748]	1.56388	0.891889	1.23395	0.20421	0.211193	0.290087	5.23001	2.38681	up
GO:0098737	protein insertion into plasma membrane	biological_process	9	0.00710024	MSTRG.19016	Mal	mal, T-cell differentiation protein [Source:RGD Symbol;Acc:3037]	1.70514	1.76004	1.8063	0.88808	0.918323	0.823618	2.00435	1.00314	up
GO:0006127	glycerophosphate shuttle	biological_process	6	0.00710024	MSTRG.26667	Gpd1	glycerol-3-phosphate dehydrogenase 1 [Source:RGD Symbol;Acc:621381]	2.5	0.764599	1.04927	0.560462	0.529418	0.458827	2.78547	1.47792	up
GO:2000534	positive regulation of renal albumin absorption	biological_process	7	0.00710024	MSTRG.7077	Adipoq	adiponectin, C1Q and collagen domain containing [Source:RGD Symbol;Acc:628748]	1.56388	0.891889	1.23395	0.20421	0.211193	0.290087	5.23001	2.38681	up
GO:0016711	flavonoid 3'-monooxygenase activity	molecular_function	7	0.00710024	ENSRNOG00000019500	Cyp1a1	cytochrome P450, family 1, subfamily a, polypeptide 1 [Source:RGD Symbol;Acc:2458]	0.03592	0.0001	0.081544	0.280251	0.378238	0.727885	0.0847996	-3.5598	down
GO:0070228	regulation of lymphocyte apoptotic process	biological_process	10	0.00710024	MSTRG.27243	Cd3g	CD3g molecule [Source:RGD Symbol;Acc:1307718]	3.1597	3.36923	1.43494	0.802837	0.611571	1.27998	2.95572	1.56351	up
GO:0001980	regulation of systemic arterial blood pressure by ischemic conditions	biological_process	7	0.00710024	MSTRG.1771	Tnni3	dynein, axonemal, assembly factor 3 [Source:RGD Symbol;Acc:2323487];troponin I3, cardiac type [Source:RGD Symbol;Acc:62052]	0.232226	0.361112	0.142345	0.656005	0.490498	0.460709	0.457739	-1.1274	down
GO:0070543	response to linoleic acid	biological_process	7	0.00710024	MSTRG.7077	Adipoq	adiponectin, C1Q and collagen domain containing [Source:RGD Symbol;Acc:628748]	1.56388	0.891889	1.23395	0.20421	0.211193	0.290087	5.23001	2.38681	up
GO:2000478	positive regulation of metanephric glomerular visceral epithelial cell development	biological_process	9	0.00710024	MSTRG.7077	Adipoq	adiponectin, C1Q and collagen domain containing [Source:RGD Symbol;Acc:628748]	1.56388	0.891889	1.23395	0.20421	0.211193	0.290087	5.23001	2.38681	up
GO:0035478	chylomicron binding	molecular_function	7	0.00710024	MSTRG.26142	Gpihbp1	glycosylphosphatidylinositol anchored high density lipoprotein binding protein 1 [Source:RGD Symbol;Acc:1564237]	2.63219	2.08795	1.30847	0.676363	0.879262	1.01499	2.3452	1.22971	up
GO:0007522	visceral muscle development	biological_process	7	0.00710024	MSTRG.10649	Myh6	myosin heavy chain 7 [Source:RGD Symbol;Acc:62030];myosin heavy chain 6 [Source:RGD Symbol;Acc:62029]	0.997238	1.06135	0.328905	1.69535	2.31046	1.00868	0.476118	-1.07061	down
GO:0071757	hexameric IgM immunoglobulin complex	cellular_component	7	0.00710024	MSTRG.24842	AABR07065651	immunoglobulin heavy constant mu [Source:MGI Symbol;Acc:MGI:96448];immunoglobulin heavy chain 6 [Source:RGD Symbol;Acc:1359202]	108.546	104.979	81.0806	35.3749	47.6802	61.9222	2.03209	1.02296	up
GO:0045932	negative regulation of muscle contraction	biological_process	9	0.00710024	MSTRG.1772	Tnnt1	troponin T1, slow skeletal type [Source:RGD Symbol;Acc:621852]	0.431625	0.589243	0.648615	2.42819	2.30412	1.00538	0.290968	-1.78107	down
GO:0050765	negative regulation of phagocytosis	biological_process	8	0.00710974	MSTRG.7077	Adipoq	adiponectin, C1Q and collagen domain containing [Source:RGD Symbol;Acc:628748]	1.56388	0.891889	1.23395	0.20421	0.211193	0.290087	5.23001	2.38681	up
GO:0050765	negative regulation of phagocytosis	biological_process	8	0.00710974	MSTRG.7866	Rack1	receptor for activated C kinase 1 [Source:RGD Symbol;Acc:69229]	2.12116	1.74372	0.700888	3.26988	5.21372	1.65053	0.450533	-1.15029	down
GO:0002026	regulation of the force of heart contraction	biological_process	9	0.00710974	MSTRG.10649	Myh6	myosin heavy chain 7 [Source:RGD Symbol;Acc:62030];myosin heavy chain 6 [Source:RGD Symbol;Acc:62029]	0.997238	1.06135	0.328905	1.69535	2.31046	1.00868	0.476118	-1.07061	down
GO:0002026	regulation of the force of heart contraction	biological_process	9	0.00710974	MSTRG.2394	Csrp3	cysteine and glycine rich protein 3 [Source:RGD Symbol;Acc:71092]	0.636871	1.03978	0.697614	1.76671	2.35583	1.56165	0.417697	-1.25947	down
GO:0030018	Z disc	cellular_component	5	0.00762757	ENSRNOG00000014815	Myoz2	myozenin 2 [Source:RGD Symbol;Acc:1307669]	0.089599	0.566478	0.085301	1.18754	1.33308	0.76693	0.225511	-2.14873	down
GO:0030018	Z disc	cellular_component	5	0.00762757	MSTRG.10649	Myh6	myosin heavy chain 7 [Source:RGD Symbol;Acc:62030];myosin heavy chain 6 [Source:RGD Symbol;Acc:62029]	0.997238	1.06135	0.328905	1.69535	2.31046	1.00868	0.476118	-1.07061	down
GO:0030018	Z disc	cellular_component	5	0.00762757	MSTRG.2394	Csrp3	cysteine and glycine rich protein 3 [Source:RGD Symbol;Acc:71092]	0.636871	1.03978	0.697614	1.76671	2.35583	1.56165	0.417697	-1.25947	down
GO:0030018	Z disc	cellular_component	5	0.00762757	MSTRG.27342	Cryab	crystallin, alpha B [Source:RGD Symbol;Acc:2414]	4.40167	3.16475	1.93664	6.6383	11.8965	6.47058	0.380041	-1.39577	down
GO:0043292	contractile fiber	cellular_component	6	0.00790941	MSTRG.1771	Tnni3	dynein, axonemal, assembly factor 3 [Source:RGD Symbol;Acc:2323487];troponin I3, cardiac type [Source:RGD Symbol;Acc:62052]	0.232226	0.361112	0.142345	0.656005	0.490498	0.460709	0.457739	-1.1274	down
GO:0043292	contractile fiber	cellular_component	6	0.00790941	MSTRG.27342	Cryab	crystallin, alpha B [Source:RGD Symbol;Acc:2414]	4.40167	3.16475	1.93664	6.6383	11.8965	6.47058	0.380041	-1.39577	down
GO:0031430	M band	cellular_component	5	0.00790941	ENSRNOG00000032994	Myom3	myomesin 3 [Source:RGD Symbol;Acc:1310060]	0.440899	0.27448	0.374804	1.15099	1.0828	0.623768	0.381508	-1.39021	down
GO:0031430	M band	cellular_component	5	0.00790941	MSTRG.27342	Cryab	crystallin, alpha B [Source:RGD Symbol;Acc:2414]	4.40167	3.16475	1.93664	6.6383	11.8965	6.47058	0.380041	-1.39577	down
GO:0019731	antibacterial humoral response	biological_process	7	0.00813405	MSTRG.10586	Rnase6	ribonuclease A family member k6 [Source:RGD Symbol;Acc:1303020]	2.74194	2.3303	1.68547	1.0146	0.903928	1.33617	2.0763	1.05401	up
GO:0019731	antibacterial humoral response	biological_process	7	0.00813405	MSTRG.24842	AABR07065651	immunoglobulin heavy constant mu [Source:MGI Symbol;Acc:MGI:96448];immunoglobulin heavy chain 6 [Source:RGD Symbol;Acc:1359202]	108.546	104.979	81.0806	35.3749	47.6802	61.9222	2.03209	1.02296	up
GO:0019731	antibacterial humoral response	biological_process	7	0.00813405	MSTRG.9426	Jchain	joining chain of multimeric IgA and IgM [Source:RGD Symbol;Acc:1310155]	132.362	133.248	97.0823	41.2594	54.0119	70.3597	2.18976	1.13077	up
GO:0050830	defense response to Gram-positive bacterium	biological_process	9	0.00917564	MSTRG.10586	Rnase6	ribonuclease A family member k6 [Source:RGD Symbol;Acc:1303020]	2.74194	2.3303	1.68547	1.0146	0.903928	1.33617	2.0763	1.05401	up
GO:0050830	defense response to Gram-positive bacterium	biological_process	9	0.00917564	MSTRG.1247	RGD1559962	similar to High mobility group protein 2 (HMG-2) [Source:RGD Symbol;Acc:1559962]	2.0089	1.58098	1.57628	1.87562	4.21377	5.19355	0.457874	-1.12698	down
GO:0050830	defense response to Gram-positive bacterium	biological_process	9	0.00917564	MSTRG.21375	Klrk1	killer cell lectin like receptor K1 [Source:RGD Symbol;Acc:3180]	3.23628	1.16965	1.88792	0.905104	0.662451	1.16837	2.30045	1.20191	up
GO:0050830	defense response to Gram-positive bacterium	biological_process	9	0.00917564	MSTRG.25663	Lyc2	lysozyme C type 2 [Source:RGD Symbol;Acc:1593616]	41.8054	26.3828	18.9251	18.5648	14.441	7.07027	2.1737	1.12015	up
GO:0071280	cellular response to copper ion	biological_process	8	0.00962371	ENSRNOG00000019500	Cyp1a1	cytochrome P450, family 1, subfamily a, polypeptide 1 [Source:RGD Symbol;Acc:2458]	0.03592	0.0001	0.081544	0.280251	0.378238	0.727885	0.0847996	-3.5598	down
GO:0071280	cellular response to copper ion	biological_process	8	0.00962371	MSTRG.13940	Mt2A	metallothionein 2A [Source:RGD Symbol;Acc:1592345]	29.572	46.2534	20.3646	9.09823	9.9753	10.0336	3.30469	1.72452	up
GO:0005520	insulin-like growth factor binding	molecular_function	6	0.0105372	MSTRG.1268	Ccn2	cellular communication network factor 2 [Source:RGD Symbol;Acc:621392]	97.162	163.002	90.2827	62.7941	47.5404	55.8168	2.1092	1.0767	up
GO:0005520	insulin-like growth factor binding	molecular_function	6	0.0105372	MSTRG.29376	Igfbp2	insulin-like growth factor binding protein 2 [Source:RGD Symbol;Acc:2873]	0.073613	0.214964	0.510057	2.1311	1.26299	0.635682	0.198184	-2.33509	down
GO:0034620	cellular response to unfolded protein	biological_process	7	0.0105372	MSTRG.17011	Hspa1b	heat shock protein family A (Hsp70) member 1B [Source:RGD Symbol;Acc:2840]	5.24329	5.52474	2.7742	7.21687	11.7813	14.7747	0.40098	-1.3184	down
GO:0034620	cellular response to unfolded protein	biological_process	7	0.0105372	MSTRG.6522	LOC680121	similar to heat shock protein 8 [Source:RGD Symbol;Acc:1595502]	30.1405	38.296	22.6258	32.113	23.1973	149.677	0.444234	-1.17061	down
GO:0102568	phospholipase A2 activity consuming 1,2-dioleoylphosphatidylethanolamine)	molecular_function	7	0.012474	ENSRNOG00000026764	Pla2g4c	phospholipase A2 group IVC [Source:RGD Symbol;Acc:1594658]	0.486308	0.281544	0.148092	0.0390525	0.0591423	0.217515	2.90122	1.53666	up
GO:0051787	misfolded protein binding	molecular_function	5	0.0134961	MSTRG.17011	Hspa1b	heat shock protein family A (Hsp70) member 1B [Source:RGD Symbol;Acc:2840]	5.24329	5.52474	2.7742	7.21687	11.7813	14.7747	0.40098	-1.3184	down
GO:0051787	misfolded protein binding	molecular_function	5	0.0134961	MSTRG.6522	LOC680121	similar to heat shock protein 8 [Source:RGD Symbol;Acc:1595502]	30.1405	38.296	22.6258	32.113	23.1973	149.677	0.444234	-1.17061	down
GO:0045954	positive regulation of natural killer cell mediated cytotoxicity	biological_process	8	0.0134961	MSTRG.21375	Klrk1	killer cell lectin like receptor K1 [Source:RGD Symbol;Acc:3180]	3.23628	1.16965	1.88792	0.905104	0.662451	1.16837	2.30045	1.20191	up
GO:0045954	positive regulation of natural killer cell mediated cytotoxicity	biological_process	8	0.0134961	MSTRG.29050	Il18rap	interleukin 18 receptor accessory protein [Source:RGD Symbol;Acc:727867]	3.58786	2.45648	3.08283	1.61627	1.37962	1.35237	2.09904	1.06973	up
GO:0031210	phosphatidylcholine binding	molecular_function	6	0.0134961	MSTRG.24842	AABR07065651	immunoglobulin heavy constant mu [Source:MGI Symbol;Acc:MGI:96448];immunoglobulin heavy chain 6 [Source:RGD Symbol;Acc:1359202]	108.546	104.979	81.0806	35.3749	47.6802	61.9222	2.03209	1.02296	up
GO:0031210	phosphatidylcholine binding	molecular_function	6	0.0134961	MSTRG.9426	Jchain	joining chain of multimeric IgA and IgM [Source:RGD Symbol;Acc:1310155]	132.362	133.248	97.0823	41.2594	54.0119	70.3597	2.18976	1.13077	up
GO:0017143	insecticide metabolic process	biological_process	6	0.0141504	ENSRNOG00000019500	Cyp1a1	cytochrome P450, family 1, subfamily a, polypeptide 1 [Source:RGD Symbol;Acc:2458]	0.03592	0.0001	0.081544	0.280251	0.378238	0.727885	0.0847996	-3.5598	down
GO:0060562	epithelial tube morphogenesis	biological_process	7	0.0141504	MSTRG.13078	Greb1l	GREB1 like retinoic acid receptor coactivator [Source:RGD Symbol;Acc:1562371]	0.243967	0.318463	0.335822	0.11646	0.127973	0.1975	2.03255	1.02329	up
GO:0102965	alcohol-forming fatty acyl-CoA reductase activity	molecular_function	7	0.0141504	MSTRG.21596	Far2	fatty acyl CoA reductase 2 [Source:RGD Symbol;Acc:1565966]	4.70552	2.47182	3.21356	1.81247	1.36236	1.33524	2.30393	1.2041	up
GO:2000502	negative regulation of natural killer cell chemotaxis	biological_process	10	0.0141504	MSTRG.21375	Klrk1	killer cell lectin like receptor K1 [Source:RGD Symbol;Acc:3180]	3.23628	1.16965	1.88792	0.905104	0.662451	1.16837	2.30045	1.20191	up
GO:0071351	cellular response to interleukin-18	biological_process	8	0.0141504	MSTRG.29050	Il18rap	interleukin 18 receptor accessory protein [Source:RGD Symbol;Acc:727867]	3.58786	2.45648	3.08283	1.61627	1.37962	1.35237	2.09904	1.06973	up
GO:0060401	cytosolic calcium ion transport	biological_process	11	0.0141504	MSTRG.1268	Ccn2	cellular communication network factor 2 [Source:RGD Symbol;Acc:621392]	97.162	163.002	90.2827	62.7941	47.5404	55.8168	2.1092	1.0767	up
GO:0030887	positive regulation of myeloid dendritic cell activation	biological_process	8	0.0141504	MSTRG.21375	Klrk1	killer cell lectin like receptor K1 [Source:RGD Symbol;Acc:3180]	3.23628	1.16965	1.88792	0.905104	0.662451	1.16837	2.30045	1.20191	up
GO:0046619	optic placode formation involved in camera-type eye formation	biological_process	7	0.0141504	MSTRG.25662	Frs2	fibroblast growth factor receptor substrate 2 [Source:RGD Symbol;Acc:1308201]	1.85463	2.23289	2.7624	1.887	8.46212	8.22208	0.368846	-1.43891	down
GO:2000376	positive regulation of oxygen metabolic process	biological_process	8	0.0141504	MSTRG.2812	Lipt2	lipoyl(octanoyl) transferase 2 [Source:RGD Symbol;Acc:1305211]	0.283157	0.506009	0.480529	0.88151	1.24304	0.745033	0.442466	-1.17636	down
GO:0006116	NADH oxidation	biological_process	5	0.0141504	MSTRG.26667	Gpd1	glycerol-3-phosphate dehydrogenase 1 [Source:RGD Symbol;Acc:621381]	2.5	0.764599	1.04927	0.560462	0.529418	0.458827	2.78547	1.47792	up
GO:0016679	oxidoreductase activity, acting on diphenols and related substances as donors	molecular_function	5	0.0141504	ENSRNOG00000019500	Cyp1a1	cytochrome P450, family 1, subfamily a, polypeptide 1 [Source:RGD Symbol;Acc:2458]	0.03592	0.0001	0.081544	0.280251	0.378238	0.727885	0.0847996	-3.5598	down
GO:0031249	denatured protein binding	molecular_function	5	0.0141504	MSTRG.17011	Hspa1b	heat shock protein family A (Hsp70) member 1B [Source:RGD Symbol;Acc:2840]	5.24329	5.52474	2.7742	7.21687	11.7813	14.7747	0.40098	-1.3184	down
GO:0034247	snoRNA splicing	biological_process	11	0.0141504	MSTRG.860	Rnf113a1	ring finger protein 113A1 [Source:RGD Symbol;Acc:1359693]	1.82938	1.04395	2.2839	0.897504	0.407751	0.592646	2.71734	1.44219	up
GO:0004367	glycerol-3-phosphate dehydrogenase [NAD+] activity	molecular_function	7	0.0141504	MSTRG.26667	Gpd1	glycerol-3-phosphate dehydrogenase 1 [Source:RGD Symbol;Acc:621381]	2.5	0.764599	1.04927	0.560462	0.529418	0.458827	2.78547	1.47792	up
GO:1902380	positive regulation of endoribonuclease activity	biological_process	9	0.0141504	MSTRG.17011	Hspa1b	heat shock protein family A (Hsp70) member 1B [Source:RGD Symbol;Acc:2840]	5.24329	5.52474	2.7742	7.21687	11.7813	14.7747	0.40098	-1.3184	down
GO:0034331	cell junction maintenance	biological_process	6	0.0141504	ENSRNOG00000001926	Cldn1	claudin 1 [Source:RGD Symbol;Acc:68422]	0.488957	0.588734	0.237891	0.155539	0.268818	0.188699	2.14594	1.10161	up
GO:0004067	asparaginase activity	molecular_function	7	0.0141504	ENSRNOG00000012843	Aspg	asparaginase [Source:RGD Symbol;Acc:708388]	1.24767	0.675715	0.661911	1.89691	2.03053	1.60372	0.467406	-1.09725	down
GO:0080019	fatty-acyl-CoA reductase (alcohol-forming) activity	molecular_function	7	0.0141504	MSTRG.21596	Far2	fatty acyl CoA reductase 2 [Source:RGD Symbol;Acc:1565966]	4.70552	2.47182	3.21356	1.81247	1.36236	1.33524	2.30393	1.2041	up
GO:0045092	interleukin-18 receptor complex	cellular_component	6	0.0141504	MSTRG.29050	Il18rap	interleukin 18 receptor accessory protein [Source:RGD Symbol;Acc:727867]	3.58786	2.45648	3.08283	1.61627	1.37962	1.35237	2.09904	1.06973	up
GO:0032608	interferon-beta production	biological_process	6	0.0141504	MSTRG.3425	Irf7	interferon regulatory factor 7 [Source:RGD Symbol;Acc:1307828]	3.76225	5.28163	2.92289	1.06032	1.17443	1.60451	3.11694	1.64013	up
GO:0032765	positive regulation of mast cell cytokine production	biological_process	9	0.0141504	ENSRNOG00000005964	Nr4a3	nuclear receptor subfamily 4, group A, member 3 [Source:RGD Symbol;Acc:61882]	0.829097	0.535612	0.350647	0.270902	0.310903	0.258833	2.04054	1.02895	up
GO:0014728	regulation of the force of skeletal muscle contraction	biological_process	12	0.0141504	MSTRG.10649	Myh6	myosin heavy chain 7 [Source:RGD Symbol;Acc:62030];myosin heavy chain 6 [Source:RGD Symbol;Acc:62029]	0.997238	1.06135	0.328905	1.69535	2.31046	1.00868	0.476118	-1.07061	down
GO:0042008	interleukin-18 receptor activity	molecular_function	7	0.0141504	MSTRG.29050	Il18rap	interleukin 18 receptor accessory protein [Source:RGD Symbol;Acc:727867]	3.58786	2.45648	3.08283	1.61627	1.37962	1.35237	2.09904	1.06973	up
GO:0031444	slow-twitch skeletal muscle fiber contraction	biological_process	11	0.0141504	MSTRG.1772	Tnnt1	troponin T1, slow skeletal type [Source:RGD Symbol;Acc:621852]	0.431625	0.589243	0.648615	2.42819	2.30412	1.00538	0.290968	-1.78107	down
GO:0004368	glycerol-3-phosphate dehydrogenase (quinone) activity	molecular_function	7	0.0141504	MSTRG.26667	Gpd1	glycerol-3-phosphate dehydrogenase 1 [Source:RGD Symbol;Acc:621381]	2.5	0.764599	1.04927	0.560462	0.529418	0.458827	2.78547	1.47792	up
GO:0045715	negative regulation of low-density lipoprotein particle receptor biosynthetic process	biological_process	10	0.0141504	MSTRG.7077	Adipoq	adiponectin, C1Q and collagen domain containing [Source:RGD Symbol;Acc:628748]	1.56388	0.891889	1.23395	0.20421	0.211193	0.290087	5.23001	2.38681	up
GO:0034059	response to anoxia	biological_process	5	0.0141504	MSTRG.1268	Ccn2	cellular communication network factor 2 [Source:RGD Symbol;Acc:621392]	97.162	163.002	90.2827	62.7941	47.5404	55.8168	2.1092	1.0767	up
GO:0018276	isopeptide cross-linking via N6-glycyl-L-lysine	biological_process	11	0.0141504	MSTRG.860	Rnf113a1	ring finger protein 113A1 [Source:RGD Symbol;Acc:1359693]	1.82938	1.04395	2.2839	0.897504	0.407751	0.592646	2.71734	1.44219	up
GO:0002223	stimulatory C-type lectin receptor signaling pathway	biological_process	8	0.0141504	MSTRG.21375	Klrk1	killer cell lectin like receptor K1 [Source:RGD Symbol;Acc:3180]	3.23628	1.16965	1.88792	0.905104	0.662451	1.16837	2.30045	1.20191	up
GO:0046168	glycerol-3-phosphate catabolic process	biological_process	9	0.0141504	MSTRG.26667	Gpd1	glycerol-3-phosphate dehydrogenase 1 [Source:RGD Symbol;Acc:621381]	2.5	0.764599	1.04927	0.560462	0.529418	0.458827	2.78547	1.47792	up
GO:0034124	regulation of MyD88-dependent toll-like receptor signaling pathway	biological_process	9	0.0141504	MSTRG.3425	Irf7	interferon regulatory factor 7 [Source:RGD Symbol;Acc:1307828]	3.76225	5.28163	2.92289	1.06032	1.17443	1.60451	3.11694	1.64013	up
GO:0071503	response to heparin	biological_process	7	0.0141504	MSTRG.26142	Gpihbp1	glycosylphosphatidylinositol anchored high density lipoprotein binding protein 1 [Source:RGD Symbol;Acc:1564237]	2.63219	2.08795	1.30847	0.676363	0.879262	1.01499	2.3452	1.22971	up
GO:0070576	vitamin D 24-hydroxylase activity	molecular_function	5	0.0141504	ENSRNOG00000019500	Cyp1a1	cytochrome P450, family 1, subfamily a, polypeptide 1 [Source:RGD Symbol;Acc:2458]	0.03592	0.0001	0.081544	0.280251	0.378238	0.727885	0.0847996	-3.5598	down
GO:0004421	hydroxymethylglutaryl-CoA synthase activity	molecular_function	7	0.0141504	MSTRG.16315	Hmgcs2	3-hydroxy-3-methylglutaryl-CoA synthase 2 [Source:RGD Symbol;Acc:2804]	0.615012	0.301299	0.622912	0.289258	0.233091	0.131719	2.35331	1.23469	up
GO:0031071	cysteine desulfurase activity	molecular_function	7	0.0141504	MSTRG.19371	Nfs1	NFS1 cysteine desulfurase [Source:RGD Symbol;Acc:620912]	3.63526	0.0001	3.65634	0.0001	0.0001	0.0001	24305.7	14.569	up
GO:2000584	negative regulation of platelet-derived growth factor receptor-alpha signaling pathway	biological_process	10	0.0141504	MSTRG.7077	Adipoq	adiponectin, C1Q and collagen domain containing [Source:RGD Symbol;Acc:628748]	1.56388	0.891889	1.23395	0.20421	0.211193	0.290087	5.23001	2.38681	up
GO:0032394	MHC class Ib receptor activity	molecular_function	6	0.0141504	MSTRG.21375	Klrk1	killer cell lectin like receptor K1 [Source:RGD Symbol;Acc:3180]	3.23628	1.16965	1.88792	0.905104	0.662451	1.16837	2.30045	1.20191	up
GO:1903076	regulation of protein localization to plasma membrane	biological_process	9	0.0145534	MSTRG.2394	Csrp3	cysteine and glycine rich protein 3 [Source:RGD Symbol;Acc:71092]	0.636871	1.03978	0.697614	1.76671	2.35583	1.56165	0.417697	-1.25947	down
GO:1903076	regulation of protein localization to plasma membrane	biological_process	9	0.0145534	MSTRG.7866	Rack1	receptor for activated C kinase 1 [Source:RGD Symbol;Acc:69229]	2.12116	1.74372	0.700888	3.26988	5.21372	1.65053	0.450533	-1.15029	down
GO:0042474	middle ear morphogenesis	biological_process	6	0.0156453	MSTRG.11358	LOC690468	similar to 60S ribosomal protein L38 [Source:RGD Symbol;Acc:1596041]	8.73527	23.9417	6.2189	7.9823	2.56257	2.99969	2.8717	1.5219	up
GO:0042474	middle ear morphogenesis	biological_process	6	0.0156453	MSTRG.16301	LOC685963	similar to 60S ribosomal protein L38 [Source:RGD Symbol;Acc:1587812]	9.62033	24.8426	7.96908	8.04825	3.22774	4.20371	2.74114	1.45478	up
GO:0044183	protein folding chaperone	molecular_function	3	0.0167712	MSTRG.17011	Hspa1b	heat shock protein family A (Hsp70) member 1B [Source:RGD Symbol;Acc:2840]	5.24329	5.52474	2.7742	7.21687	11.7813	14.7747	0.40098	-1.3184	down
GO:0044183	protein folding chaperone	molecular_function	3	0.0167712	MSTRG.6522	LOC680121	similar to heat shock protein 8 [Source:RGD Symbol;Acc:1595502]	30.1405	38.296	22.6258	32.113	23.1973	149.677	0.444234	-1.17061	down
GO:0022627	cytosolic small ribosomal subunit	cellular_component	8	0.0169554	MSTRG.23291	LOC100362149	ribosomal protein S20-like [Source:RGD Symbol;Acc:2318734]	5.17524	3.97197	5.25486	4.70844	14.5374	10.2089	0.488957	-1.03222	down
GO:0022627	cytosolic small ribosomal subunit	cellular_component	8	0.0169554	MSTRG.28226	AABR07071482		0.81612	0.929613	0.839154	2.29921	1.63257	2.67258	0.391391	-1.35332	down
GO:0022627	cytosolic small ribosomal subunit	cellular_component	8	0.0169554	MSTRG.28488	LOC100362684	ribosomal protein S20-like [Source:RGD Symbol;Acc:2324274]	4.34034	18.8852	4.45946	4.11471	2.30514	4.54696	2.52444	1.33596	up
GO:0022627	cytosolic small ribosomal subunit	cellular_component	8	0.0169554	MSTRG.7866	Rack1	receptor for activated C kinase 1 [Source:RGD Symbol;Acc:69229]	2.12116	1.74372	0.700888	3.26988	5.21372	1.65053	0.450533	-1.15029	down
GO:0030332	cyclin binding	molecular_function	5	0.0191231	MSTRG.16024	Crabp2	cellular retinoic acid binding protein 2 [Source:RGD Symbol;Acc:62070]	2.61663	8.42398	7.11811	2.96094	3.12274	2.63796	2.08203	1.05799	up
GO:0030332	cyclin binding	molecular_function	5	0.0191231	MSTRG.7866	Rack1	receptor for activated C kinase 1 [Source:RGD Symbol;Acc:69229]	2.12116	1.74372	0.700888	3.26988	5.21372	1.65053	0.450533	-1.15029	down
GO:0016324	apical plasma membrane	cellular_component	5	0.0206728	ENSRNOG00000001926	Cldn1	claudin 1 [Source:RGD Symbol;Acc:68422]	0.488957	0.588734	0.237891	0.155539	0.268818	0.188699	2.14594	1.10161	up
GO:0016324	apical plasma membrane	cellular_component	5	0.0206728	ENSRNOG00000013053	Trpm6	transient receptor potential cation channel, subfamily M, member 6 [Source:RGD Symbol;Acc:1309942]	0.230886	0.220623	0.230274	0.013119	0.115142	0.093009	3.08123	1.6235	up
GO:0016324	apical plasma membrane	cellular_component	5	0.0206728	MSTRG.17011	Hspa1b	heat shock protein family A (Hsp70) member 1B [Source:RGD Symbol;Acc:2840]	5.24329	5.52474	2.7742	7.21687	11.7813	14.7747	0.40098	-1.3184	down
GO:0016324	apical plasma membrane	cellular_component	5	0.0206728	MSTRG.19016	Mal	mal, T-cell differentiation protein [Source:RGD Symbol;Acc:3037]	1.70514	1.76004	1.8063	0.88808	0.918323	0.823618	2.00435	1.00314	up
GO:0016324	apical plasma membrane	cellular_component	5	0.0206728	MSTRG.26142	Gpihbp1	glycosylphosphatidylinositol anchored high density lipoprotein binding protein 1 [Source:RGD Symbol;Acc:1564237]	2.63219	2.08795	1.30847	0.676363	0.879262	1.01499	2.3452	1.22971	up
GO:0016324	apical plasma membrane	cellular_component	5	0.0206728	MSTRG.29376	Igfbp2	insulin-like growth factor binding protein 2 [Source:RGD Symbol;Acc:2873]	0.073613	0.214964	0.510057	2.1311	1.26299	0.635682	0.198184	-2.33509	down
GO:0002933	lipid hydroxylation	biological_process	8	0.0211509	ENSRNOG00000019500	Cyp1a1	cytochrome P450, family 1, subfamily a, polypeptide 1 [Source:RGD Symbol;Acc:2458]	0.03592	0.0001	0.081544	0.280251	0.378238	0.727885	0.0847996	-3.5598	down
GO:0032607	interferon-alpha production	biological_process	6	0.0211509	MSTRG.3425	Irf7	interferon regulatory factor 7 [Source:RGD Symbol;Acc:1307828]	3.76225	5.28163	2.92289	1.06032	1.17443	1.60451	3.11694	1.64013	up
GO:0061760	antifungal innate immune response	biological_process	6	0.0211509	MSTRG.10586	Rnase6	ribonuclease A family member k6 [Source:RGD Symbol;Acc:1303020]	2.74194	2.3303	1.68547	1.0146	0.903928	1.33617	2.0763	1.05401	up
GO:0004946	bombesin receptor activity	molecular_function	8	0.0211509	ENSRNOG00000000873	Brs3	bombesin receptor subtype 3 [Source:RGD Symbol;Acc:628645]	0.684856	0.476728	0.325205	0.138879	0.100965	0.373652	2.42347	1.27707	up
GO:0032387	negative regulation of intracellular transport	biological_process	8	0.0211509	MSTRG.27342	Cryab	crystallin, alpha B [Source:RGD Symbol;Acc:2414]	4.40167	3.16475	1.93664	6.6383	11.8965	6.47058	0.380041	-1.39577	down
GO:0009331	glycerol-3-phosphate dehydrogenase complex	cellular_component	6	0.0211509	MSTRG.26667	Gpd1	glycerol-3-phosphate dehydrogenase 1 [Source:RGD Symbol;Acc:621381]	2.5	0.764599	1.04927	0.560462	0.529418	0.458827	2.78547	1.47792	up
GO:0004522	ribonuclease A activity	molecular_function	10	0.0211509	MSTRG.10586	Rnase6	ribonuclease A family member k6 [Source:RGD Symbol;Acc:1303020]	2.74194	2.3303	1.68547	1.0146	0.903928	1.33617	2.0763	1.05401	up
GO:0101021	estrogen 2-hydroxylase activity	molecular_function	7	0.0211509	ENSRNOG00000019500	Cyp1a1	cytochrome P450, family 1, subfamily a, polypeptide 1 [Source:RGD Symbol;Acc:2458]	0.03592	0.0001	0.081544	0.280251	0.378238	0.727885	0.0847996	-3.5598	down
GO:0070673	response to interleukin-18	biological_process	7	0.0211509	ENSRNOG00000001926	Cldn1	claudin 1 [Source:RGD Symbol;Acc:68422]	0.488957	0.588734	0.237891	0.155539	0.268818	0.188699	2.14594	1.10161	up
GO:0031989	bombesin receptor signaling pathway	biological_process	6	0.0211509	ENSRNOG00000000873	Brs3	bombesin receptor subtype 3 [Source:RGD Symbol;Acc:628645]	0.684856	0.476728	0.325205	0.138879	0.100965	0.373652	2.42347	1.27707	up
GO:0030172	troponin C binding	molecular_function	6	0.0211509	MSTRG.1771	Tnni3	dynein, axonemal, assembly factor 3 [Source:RGD Symbol;Acc:2323487];troponin I3, cardiac type [Source:RGD Symbol;Acc:62052]	0.232226	0.361112	0.142345	0.656005	0.490498	0.460709	0.457739	-1.1274	down
GO:0009804	coumarin metabolic process	biological_process	7	0.0211509	ENSRNOG00000019500	Cyp1a1	cytochrome P450, family 1, subfamily a, polypeptide 1 [Source:RGD Symbol;Acc:2458]	0.03592	0.0001	0.081544	0.280251	0.378238	0.727885	0.0847996	-3.5598	down
GO:1990630	IRE1-RACK1-PP2A complex	cellular_component	4	0.0211509	MSTRG.7866	Rack1	receptor for activated C kinase 1 [Source:RGD Symbol;Acc:69229]	2.12116	1.74372	0.700888	3.26988	5.21372	1.65053	0.450533	-1.15029	down
GO:0035995	detection of muscle stretch	biological_process	7	0.0211509	MSTRG.2394	Csrp3	cysteine and glycine rich protein 3 [Source:RGD Symbol;Acc:71092]	0.636871	1.03978	0.697614	1.76671	2.35583	1.56165	0.417697	-1.25947	down
GO:0032982	myosin filament	cellular_component	5	0.0211509	MSTRG.10649	Myh6	myosin heavy chain 7 [Source:RGD Symbol;Acc:62030];myosin heavy chain 6 [Source:RGD Symbol;Acc:62029]	0.997238	1.06135	0.328905	1.69535	2.31046	1.00868	0.476118	-1.07061	down
GO:0101020	estrogen 16-alpha-hydroxylase activity	molecular_function	7	0.0211509	ENSRNOG00000019500	Cyp1a1	cytochrome P450, family 1, subfamily a, polypeptide 1 [Source:RGD Symbol;Acc:2458]	0.03592	0.0001	0.081544	0.280251	0.378238	0.727885	0.0847996	-3.5598	down
GO:1990584	cardiac Troponin complex	cellular_component	5	0.0211509	MSTRG.1771	Tnni3	dynein, axonemal, assembly factor 3 [Source:RGD Symbol;Acc:2323487];troponin I3, cardiac type [Source:RGD Symbol;Acc:62052]	0.232226	0.361112	0.142345	0.656005	0.490498	0.460709	0.457739	-1.1274	down
GO:1900625	positive regulation of monocyte aggregation	biological_process	9	0.0211509	ENSRNOG00000005964	Nr4a3	nuclear receptor subfamily 4, group A, member 3 [Source:RGD Symbol;Acc:61882]	0.829097	0.535612	0.350647	0.270902	0.310903	0.258833	2.04054	1.02895	up
GO:0099583	neurotransmitter receptor activity involved in regulation of postsynaptic cytosolic calcium ion concentration	molecular_function	7	0.0211509	ENSRNOG00000045816	Gria1	glutamate ionotropic receptor AMPA type subunit 1 [Source:RGD Symbol;Acc:621531]	0.153662	0.0781212	0.0762892	0.328888	0.272742	0.303107	0.34051	-1.55423	down
GO:0050867	positive regulation of cell activation	biological_process	7	0.0211509	MSTRG.1268	Ccn2	cellular communication network factor 2 [Source:RGD Symbol;Acc:621392]	97.162	163.002	90.2827	62.7941	47.5404	55.8168	2.1092	1.0767	up
GO:0060420	regulation of heart growth	biological_process	8	0.0211509	MSTRG.10649	Myh6	myosin heavy chain 7 [Source:RGD Symbol;Acc:62030];myosin heavy chain 6 [Source:RGD Symbol;Acc:62029]	0.997238	1.06135	0.328905	1.69535	2.31046	1.00868	0.476118	-1.07061	down
GO:0034769	basement membrane disassembly	biological_process	6	0.0211509	MSTRG.10688	Cma1	chymase 1 [Source:RGD Symbol;Acc:2365]	4.6429	2.56201	3.59294	1.91197	1.46093	1.90488	2.04591	1.03274	up
GO:0004971	AMPA glutamate receptor activity	molecular_function	8	0.0211509	ENSRNOG00000045816	Gria1	glutamate ionotropic receptor AMPA type subunit 1 [Source:RGD Symbol;Acc:621531]	0.153662	0.0781212	0.0762892	0.328888	0.272742	0.303107	0.34051	-1.55423	down
GO:0099544	perisynaptic space	cellular_component	4	0.0211509	ENSRNOG00000045816	Gria1	glutamate ionotropic receptor AMPA type subunit 1 [Source:RGD Symbol;Acc:621531]	0.153662	0.0781212	0.0762892	0.328888	0.272742	0.303107	0.34051	-1.55423	down
GO:0097752	regulation of DNA stability	biological_process	5	0.0211509	MSTRG.23275	Ddi2	DNA damage inducible 1 homolog 2 [Source:RGD Symbol;Acc:1311815]	10.1342	3.79607	10.2228	3.09844	3.26578	3.1576	2.5366	1.34289	up
GO:0042007	interleukin-18 binding	molecular_function	6	0.0211509	MSTRG.29050	Il18rap	interleukin 18 receptor accessory protein [Source:RGD Symbol;Acc:727867]	3.58786	2.45648	3.08283	1.61627	1.37962	1.35237	2.09904	1.06973	up
GO:0007568	aging	biological_process	4	0.0212409	ENSRNOG00000001926	Cldn1	claudin 1 [Source:RGD Symbol;Acc:68422]	0.488957	0.588734	0.237891	0.155539	0.268818	0.188699	2.14594	1.10161	up
GO:0007568	aging	biological_process	4	0.0212409	ENSRNOG00000019500	Cyp1a1	cytochrome P450, family 1, subfamily a, polypeptide 1 [Source:RGD Symbol;Acc:2458]	0.03592	0.0001	0.081544	0.280251	0.378238	0.727885	0.0847996	-3.5598	down
GO:0007568	aging	biological_process	4	0.0212409	MSTRG.1268	Ccn2	cellular communication network factor 2 [Source:RGD Symbol;Acc:621392]	97.162	163.002	90.2827	62.7941	47.5404	55.8168	2.1092	1.0767	up
GO:0007568	aging	biological_process	4	0.0212409	MSTRG.27342	Cryab	crystallin, alpha B [Source:RGD Symbol;Acc:2414]	4.40167	3.16475	1.93664	6.6383	11.8965	6.47058	0.380041	-1.39577	down
GO:0007568	aging	biological_process	4	0.0212409	MSTRG.29376	Igfbp2	insulin-like growth factor binding protein 2 [Source:RGD Symbol;Acc:2873]	0.073613	0.214964	0.510057	2.1311	1.26299	0.635682	0.198184	-2.33509	down
GO:0007369	gastrulation	biological_process	6	0.0216048	ENSRNOG00000005964	Nr4a3	nuclear receptor subfamily 4, group A, member 3 [Source:RGD Symbol;Acc:61882]	0.829097	0.535612	0.350647	0.270902	0.310903	0.258833	2.04054	1.02895	up
GO:0007369	gastrulation	biological_process	6	0.0216048	MSTRG.7866	Rack1	receptor for activated C kinase 1 [Source:RGD Symbol;Acc:69229]	2.12116	1.74372	0.700888	3.26988	5.21372	1.65053	0.450533	-1.15029	down
GO:0051085	chaperone cofactor-dependent protein refolding	biological_process	7	0.0216048	MSTRG.17011	Hspa1b	heat shock protein family A (Hsp70) member 1B [Source:RGD Symbol;Acc:2840]	5.24329	5.52474	2.7742	7.21687	11.7813	14.7747	0.40098	-1.3184	down
GO:0051085	chaperone cofactor-dependent protein refolding	biological_process	7	0.0216048	MSTRG.6522	LOC680121	similar to heat shock protein 8 [Source:RGD Symbol;Acc:1595502]	30.1405	38.296	22.6258	32.113	23.1973	149.677	0.444234	-1.17061	down
GO:0009636	response to toxic substance	biological_process	5	0.0219912	ENSRNOG00000001926	Cldn1	claudin 1 [Source:RGD Symbol;Acc:68422]	0.488957	0.588734	0.237891	0.155539	0.268818	0.188699	2.14594	1.10161	up
GO:0009636	response to toxic substance	biological_process	5	0.0219912	ENSRNOG00000013053	Trpm6	transient receptor potential cation channel, subfamily M, member 6 [Source:RGD Symbol;Acc:1309942]	0.230886	0.220623	0.230274	0.013119	0.115142	0.093009	3.08123	1.6235	up
GO:0009636	response to toxic substance	biological_process	5	0.0219912	ENSRNOG00000019500	Cyp1a1	cytochrome P450, family 1, subfamily a, polypeptide 1 [Source:RGD Symbol;Acc:2458]	0.03592	0.0001	0.081544	0.280251	0.378238	0.727885	0.0847996	-3.5598	down
GO:0004866	endopeptidase inhibitor activity	molecular_function	7	0.0228931	ENSRNOG00000032728	LOC689230	similar to stefin A2 [Source:RGD Symbol;Acc:1594822]	0.669952	1.20217	0.384924	0.134809	0.198129	0.339906	3.35448	1.74609	up
GO:0004866	endopeptidase inhibitor activity	molecular_function	7	0.0228931	MSTRG.6911	AABR07034362	stefin A2 [Source:RGD Symbol;Acc:1562186]	12.1028	7.72974	9.06158	1.16056	2.96199	6.42592	2.73918	1.45374	up
GO:0006826	iron ion transport	biological_process	10	0.0228931	ENSRNOG00000001739	Meltf	melanotransferrin [Source:RGD Symbol;Acc:1308155]	0.547705	1.43145	0.847265	0.639556	0.295855	0.228587	2.4282	1.27989	up
GO:0006826	iron ion transport	biological_process	10	0.0228931	MSTRG.2963	AABR07005031		1.23131	1.57767	0.841578	3.18902	3.75164	4.00715	0.333451	-1.58445	down
GO:0051607	defense response to virus	biological_process	5	0.0232419	ENSRNOG00000049282	Oas2	2'-5' oligoadenylate synthetase 2 [Source:RGD Symbol;Acc:1359697]	1.13584	0.796252	0.431963	0.36197	0.392657	0.369048	2.10386	1.07304	up
GO:0051607	defense response to virus	biological_process	5	0.0232419	MSTRG.10586	Rnase6	ribonuclease A family member k6 [Source:RGD Symbol;Acc:1303020]	2.74194	2.3303	1.68547	1.0146	0.903928	1.33617	2.0763	1.05401	up
GO:0051607	defense response to virus	biological_process	5	0.0232419	MSTRG.3425	Irf7	interferon regulatory factor 7 [Source:RGD Symbol;Acc:1307828]	3.76225	5.28163	2.92289	1.06032	1.17443	1.60451	3.11694	1.64013	up
GO:0051607	defense response to virus	biological_process	5	0.0232419	MSTRG.4039	Ifit3	interferon-induced protein with tetratricopeptide repeats 3 [Source:RGD Symbol;Acc:1359681]	4.97721	3.52241	3.21606	1.3741	1.53573	2.40418	2.20468	1.14057	up
GO:0051082	unfolded protein binding	molecular_function	5	0.0240928	MSTRG.17011	Hspa1b	heat shock protein family A (Hsp70) member 1B [Source:RGD Symbol;Acc:2840]	5.24329	5.52474	2.7742	7.21687	11.7813	14.7747	0.40098	-1.3184	down
GO:0051082	unfolded protein binding	molecular_function	5	0.0240928	MSTRG.27342	Cryab	crystallin, alpha B [Source:RGD Symbol;Acc:2414]	4.40167	3.16475	1.93664	6.6383	11.8965	6.47058	0.380041	-1.39577	down
GO:0051082	unfolded protein binding	molecular_function	5	0.0240928	MSTRG.6522	LOC680121	similar to heat shock protein 8 [Source:RGD Symbol;Acc:1595502]	30.1405	38.296	22.6258	32.113	23.1973	149.677	0.444234	-1.17061	down
GO:1904707	positive regulation of vascular smooth muscle cell proliferation	biological_process	9	0.0255621	ENSRNOG00000005964	Nr4a3	nuclear receptor subfamily 4, group A, member 3 [Source:RGD Symbol;Acc:61882]	0.829097	0.535612	0.350647	0.270902	0.310903	0.258833	2.04054	1.02895	up
GO:1904707	positive regulation of vascular smooth muscle cell proliferation	biological_process	9	0.0255621	MSTRG.25662	Frs2	fibroblast growth factor receptor substrate 2 [Source:RGD Symbol;Acc:1308201]	1.85463	2.23289	2.7624	1.887	8.46212	8.22208	0.368846	-1.43891	down
GO:0016235	aggresome	cellular_component	6	0.0269417	MSTRG.17011	Hspa1b	heat shock protein family A (Hsp70) member 1B [Source:RGD Symbol;Acc:2840]	5.24329	5.52474	2.7742	7.21687	11.7813	14.7747	0.40098	-1.3184	down
GO:0016235	aggresome	cellular_component	6	0.0269417	MSTRG.23260	Hspb7	heat shock protein family B (small) member 7 [Source:RGD Symbol;Acc:62021]	2.46517	1.00351	0.914151	2.58052	4.33748	2.0995	0.486036	-1.04086	down
GO:0001503	ossification	biological_process	4	0.0278286	MSTRG.11358	LOC690468	similar to 60S ribosomal protein L38 [Source:RGD Symbol;Acc:1596041]	8.73527	23.9417	6.2189	7.9823	2.56257	2.99969	2.8717	1.5219	up
GO:0001503	ossification	biological_process	4	0.0278286	MSTRG.1268	Ccn2	cellular communication network factor 2 [Source:RGD Symbol;Acc:621392]	97.162	163.002	90.2827	62.7941	47.5404	55.8168	2.1092	1.0767	up
GO:0001503	ossification	biological_process	4	0.0278286	MSTRG.16301	LOC685963	similar to 60S ribosomal protein L38 [Source:RGD Symbol;Acc:1587812]	9.62033	24.8426	7.96908	8.04825	3.22774	4.20371	2.74114	1.45478	up
GO:0044378	non-sequence-specific DNA binding, bending	molecular_function	8	0.028102	MSTRG.1247	RGD1559962	similar to High mobility group protein 2 (HMG-2) [Source:RGD Symbol;Acc:1559962]	2.0089	1.58098	1.57628	1.87562	4.21377	5.19355	0.457874	-1.12698	down
GO:0046483	heterocycle metabolic process	biological_process	5	0.028102	ENSRNOG00000019500	Cyp1a1	cytochrome P450, family 1, subfamily a, polypeptide 1 [Source:RGD Symbol;Acc:2458]	0.03592	0.0001	0.081544	0.280251	0.378238	0.727885	0.0847996	-3.5598	down
GO:0017038	protein import	biological_process	10	0.028102	MSTRG.26142	Gpihbp1	glycosylphosphatidylinositol anchored high density lipoprotein binding protein 1 [Source:RGD Symbol;Acc:1564237]	2.63219	2.08795	1.30847	0.676363	0.879262	1.01499	2.3452	1.22971	up
GO:2000253	positive regulation of feeding behavior	biological_process	7	0.028102	ENSRNOG00000005964	Nr4a3	nuclear receptor subfamily 4, group A, member 3 [Source:RGD Symbol;Acc:61882]	0.829097	0.535612	0.350647	0.270902	0.310903	0.258833	2.04054	1.02895	up
GO:0044308	axonal spine	cellular_component	6	0.028102	ENSRNOG00000045816	Gria1	glutamate ionotropic receptor AMPA type subunit 1 [Source:RGD Symbol;Acc:621531]	0.153662	0.0781212	0.0762892	0.328888	0.272742	0.303107	0.34051	-1.55423	down
GO:1990833	clathrin-uncoating ATPase activity	molecular_function	11	0.028102	MSTRG.6522	LOC680121	similar to heat shock protein 8 [Source:RGD Symbol;Acc:1595502]	30.1405	38.296	22.6258	32.113	23.1973	149.677	0.444234	-1.17061	down
GO:0070278	extracellular matrix constituent secretion	biological_process	5	0.028102	MSTRG.1268	Ccn2	cellular communication network factor 2 [Source:RGD Symbol;Acc:621392]	97.162	163.002	90.2827	62.7941	47.5404	55.8168	2.1092	1.0767	up
GO:0030049	muscle filament sliding	biological_process	8	0.028102	MSTRG.10649	Myh6	myosin heavy chain 7 [Source:RGD Symbol;Acc:62030];myosin heavy chain 6 [Source:RGD Symbol;Acc:62029]	0.997238	1.06135	0.328905	1.69535	2.31046	1.00868	0.476118	-1.07061	down
GO:0019862	IgA binding	molecular_function	6	0.028102	MSTRG.9426	Jchain	joining chain of multimeric IgA and IgM [Source:RGD Symbol;Acc:1310155]	132.362	133.248	97.0823	41.2594	54.0119	70.3597	2.18976	1.13077	up
GO:0071870	cellular response to catecholamine stimulus	biological_process	8	0.028102	ENSRNOG00000005964	Nr4a3	nuclear receptor subfamily 4, group A, member 3 [Source:RGD Symbol;Acc:61882]	0.829097	0.535612	0.350647	0.270902	0.310903	0.258833	2.04054	1.02895	up
GO:0030297	transmembrane receptor protein tyrosine kinase activator activity	molecular_function	9	0.028102	ENSRNOG00000005008	Angpt4	angiopoietin 4 [Source:RGD Symbol;Acc:1307539]	0.957383	0.605696	0.869505	0.442478	0.367232	0.262644	2.26845	1.18171	up
GO:1990832	slow axonal transport	biological_process	10	0.028102	MSTRG.6522	LOC680121	similar to heat shock protein 8 [Source:RGD Symbol;Acc:1595502]	30.1405	38.296	22.6258	32.113	23.1973	149.677	0.444234	-1.17061	down
GO:0043503	skeletal muscle fiber adaptation	biological_process	5	0.028102	ENSRNOG00000014815	Myoz2	myozenin 2 [Source:RGD Symbol;Acc:1307669]	0.089599	0.566478	0.085301	1.18754	1.33308	0.76693	0.225511	-2.14873	down
GO:0008200	ion channel inhibitor activity	molecular_function	6	0.028102	MSTRG.7866	Rack1	receptor for activated C kinase 1 [Source:RGD Symbol;Acc:69229]	2.12116	1.74372	0.700888	3.26988	5.21372	1.65053	0.450533	-1.15029	down
GO:0036018	cellular response to erythropoietin	biological_process	8	0.028102	MSTRG.13940	Mt2A	metallothionein 2A [Source:RGD Symbol;Acc:1592345]	29.572	46.2534	20.3646	9.09823	9.9753	10.0336	3.30469	1.72452	up
GO:1905907	negative regulation of amyloid fibril formation	biological_process	9	0.028102	MSTRG.27342	Cryab	crystallin, alpha B [Source:RGD Symbol;Acc:2414]	4.40167	3.16475	1.93664	6.6383	11.8965	6.47058	0.380041	-1.39577	down
GO:0018894	dibenzo-p-dioxin metabolic process	biological_process	6	0.028102	ENSRNOG00000019500	Cyp1a1	cytochrome P450, family 1, subfamily a, polypeptide 1 [Source:RGD Symbol;Acc:2458]	0.03592	0.0001	0.081544	0.280251	0.378238	0.727885	0.0847996	-3.5598	down
GO:0030292	protein tyrosine kinase inhibitor activity	molecular_function	8	0.028102	MSTRG.7866	Rack1	receptor for activated C kinase 1 [Source:RGD Symbol;Acc:69229]	2.12116	1.74372	0.700888	3.26988	5.21372	1.65053	0.450533	-1.15029	down
GO:0032488	Cdc42 protein signal transduction	biological_process	9	0.028102	MSTRG.14618	Rhou	ras homolog family member U [Source:MGI Symbol;Acc:MGI:1916831]	2.42309	1.84505	2.54412	2.55395	2.5103	9.21669	0.477017	-1.06789	down
GO:0051385	response to mineralocorticoid	biological_process	8	0.028102	MSTRG.1268	Ccn2	cellular communication network factor 2 [Source:RGD Symbol;Acc:621392]	97.162	163.002	90.2827	62.7941	47.5404	55.8168	2.1092	1.0767	up
GO:1904764	chaperone-mediated autophagy translocation complex disassembly	biological_process	7	0.028102	MSTRG.6522	LOC680121	similar to heat shock protein 8 [Source:RGD Symbol;Acc:1595502]	30.1405	38.296	22.6258	32.113	23.1973	149.677	0.444234	-1.17061	down
GO:0070318	positive regulation of G0 to G1 transition	biological_process	9	0.028102	MSTRG.1268	Ccn2	cellular communication network factor 2 [Source:RGD Symbol;Acc:621392]	97.162	163.002	90.2827	62.7941	47.5404	55.8168	2.1092	1.0767	up
GO:0071284	cellular response to lead ion	biological_process	8	0.028102	ENSRNOG00000001926	Cldn1	claudin 1 [Source:RGD Symbol;Acc:68422]	0.488957	0.588734	0.237891	0.155539	0.268818	0.188699	2.14594	1.10161	up
GO:0010041	response to iron(III) ion	biological_process	8	0.028102	ENSRNOG00000019500	Cyp1a1	cytochrome P450, family 1, subfamily a, polypeptide 1 [Source:RGD Symbol;Acc:2458]	0.03592	0.0001	0.081544	0.280251	0.378238	0.727885	0.0847996	-3.5598	down
GO:0009624	response to nematode	biological_process	7	0.028102	ENSRNOG00000019500	Cyp1a1	cytochrome P450, family 1, subfamily a, polypeptide 1 [Source:RGD Symbol;Acc:2458]	0.03592	0.0001	0.081544	0.280251	0.378238	0.727885	0.0847996	-3.5598	down
GO:0070434	positive regulation of nucleotide-binding oligomerization domain containing 2 signaling pathway	biological_process	10	0.028102	MSTRG.17011	Hspa1b	heat shock protein family A (Hsp70) member 1B [Source:RGD Symbol;Acc:2840]	5.24329	5.52474	2.7742	7.21687	11.7813	14.7747	0.40098	-1.3184	down
GO:0003338	metanephros morphogenesis	biological_process	7	0.028102	ENSRNOG00000002053	Fras1	Fraser extracellular matrix complex subunit 1 [Source:RGD Symbol;Acc:1306516]	0.139257	0.067374	0.065133	0.196717	0.15547	0.194714	0.496916	-1.00893	down
GO:0032814	regulation of natural killer cell activation	biological_process	8	0.028102	MSTRG.8909	Slamf7	SLAM family member 7 [Source:RGD Symbol;Acc:1560190]	2.04248	2.26062	1.47931	0.51249	0.624687	1.37511	2.30165	1.20267	up
GO:0140318	protein transporter activity	molecular_function	4	0.028102	MSTRG.26142	Gpihbp1	glycosylphosphatidylinositol anchored high density lipoprotein binding protein 1 [Source:RGD Symbol;Acc:1564237]	2.63219	2.08795	1.30847	0.676363	0.879262	1.01499	2.3452	1.22971	up
GO:0008065	establishment of blood-nerve barrier	biological_process	8	0.028102	ENSRNOG00000001926	Cldn1	claudin 1 [Source:RGD Symbol;Acc:68422]	0.488957	0.588734	0.237891	0.155539	0.268818	0.188699	2.14594	1.10161	up
GO:0097060	synaptic membrane	cellular_component	4	0.0312555	ENSRNOG00000045816	Gria1	glutamate ionotropic receptor AMPA type subunit 1 [Source:RGD Symbol;Acc:621531]	0.153662	0.0781212	0.0762892	0.328888	0.272742	0.303107	0.34051	-1.55423	down
GO:0097060	synaptic membrane	cellular_component	4	0.0312555	MSTRG.27342	Cryab	crystallin, alpha B [Source:RGD Symbol;Acc:2414]	4.40167	3.16475	1.93664	6.6383	11.8965	6.47058	0.380041	-1.39577	down
GO:0030016	myofibril	cellular_component	7	0.0312555	MSTRG.10649	Myh6	myosin heavy chain 7 [Source:RGD Symbol;Acc:62030];myosin heavy chain 6 [Source:RGD Symbol;Acc:62029]	0.997238	1.06135	0.328905	1.69535	2.31046	1.00868	0.476118	-1.07061	down
GO:0030016	myofibril	cellular_component	7	0.0312555	MSTRG.1771	Tnni3	dynein, axonemal, assembly factor 3 [Source:RGD Symbol;Acc:2323487];troponin I3, cardiac type [Source:RGD Symbol;Acc:62052]	0.232226	0.361112	0.142345	0.656005	0.490498	0.460709	0.457739	-1.1274	down
GO:0004869	cysteine-type endopeptidase inhibitor activity	molecular_function	8	0.0312555	ENSRNOG00000032728	LOC689230	similar to stefin A2 [Source:RGD Symbol;Acc:1594822]	0.669952	1.20217	0.384924	0.134809	0.198129	0.339906	3.35448	1.74609	up
GO:0004869	cysteine-type endopeptidase inhibitor activity	molecular_function	8	0.0312555	MSTRG.6911	AABR07034362	stefin A2 [Source:RGD Symbol;Acc:1562186]	12.1028	7.72974	9.06158	1.16056	2.96199	6.42592	2.73918	1.45374	up
GO:0046034	ATP metabolic process	biological_process	4	0.0327501	MSTRG.10649	Myh6	myosin heavy chain 7 [Source:RGD Symbol;Acc:62030];myosin heavy chain 6 [Source:RGD Symbol;Acc:62029]	0.997238	1.06135	0.328905	1.69535	2.31046	1.00868	0.476118	-1.07061	down
GO:0046034	ATP metabolic process	biological_process	4	0.0327501	MSTRG.17011	Hspa1b	heat shock protein family A (Hsp70) member 1B [Source:RGD Symbol;Acc:2840]	5.24329	5.52474	2.7742	7.21687	11.7813	14.7747	0.40098	-1.3184	down
GO:0030017	sarcomere	cellular_component	5	0.0342723	ENSRNOG00000032994	Myom3	myomesin 3 [Source:RGD Symbol;Acc:1310060]	0.440899	0.27448	0.374804	1.15099	1.0828	0.623768	0.381508	-1.39021	down
GO:0030017	sarcomere	cellular_component	5	0.0342723	MSTRG.1771	Tnni3	dynein, axonemal, assembly factor 3 [Source:RGD Symbol;Acc:2323487];troponin I3, cardiac type [Source:RGD Symbol;Acc:62052]	0.232226	0.361112	0.142345	0.656005	0.490498	0.460709	0.457739	-1.1274	down
GO:0046658	anchored component of plasma membrane	cellular_component	6	0.0342723	ENSRNOG00000001739	Meltf	melanotransferrin [Source:RGD Symbol;Acc:1308155]	0.547705	1.43145	0.847265	0.639556	0.295855	0.228587	2.4282	1.27989	up
GO:0046658	anchored component of plasma membrane	cellular_component	6	0.0342723	MSTRG.26142	Gpihbp1	glycosylphosphatidylinositol anchored high density lipoprotein binding protein 1 [Source:RGD Symbol;Acc:1564237]	2.63219	2.08795	1.30847	0.676363	0.879262	1.01499	2.3452	1.22971	up
GO:0002088	lens development in camera-type eye	biological_process	5	0.0342723	MSTRG.25662	Frs2	fibroblast growth factor receptor substrate 2 [Source:RGD Symbol;Acc:1308201]	1.85463	2.23289	2.7624	1.887	8.46212	8.22208	0.368846	-1.43891	down
GO:0002088	lens development in camera-type eye	biological_process	5	0.0342723	MSTRG.27342	Cryab	crystallin, alpha B [Source:RGD Symbol;Acc:2414]	4.40167	3.16475	1.93664	6.6383	11.8965	6.47058	0.380041	-1.39577	down
GO:0061740	protein targeting to lysosome involved in chaperone-mediated autophagy	biological_process	14	0.035004	MSTRG.6522	LOC680121	similar to heat shock protein 8 [Source:RGD Symbol;Acc:1595502]	30.1405	38.296	22.6258	32.113	23.1973	149.677	0.444234	-1.17061	down
GO:0045923	positive regulation of fatty acid metabolic process	biological_process	9	0.035004	MSTRG.7077	Adipoq	adiponectin, C1Q and collagen domain containing [Source:RGD Symbol;Acc:628748]	1.56388	0.891889	1.23395	0.20421	0.211193	0.290087	5.23001	2.38681	up
GO:0070370	cellular heat acclimation	biological_process	7	0.035004	MSTRG.17011	Hspa1b	heat shock protein family A (Hsp70) member 1B [Source:RGD Symbol;Acc:2840]	5.24329	5.52474	2.7742	7.21687	11.7813	14.7747	0.40098	-1.3184	down
GO:0035744	T-helper 1 cell cytokine production	biological_process	8	0.035004	MSTRG.29050	Il18rap	interleukin 18 receptor accessory protein [Source:RGD Symbol;Acc:727867]	3.58786	2.45648	3.08283	1.61627	1.37962	1.35237	2.09904	1.06973	up
GO:0006778	porphyrin-containing compound metabolic process	biological_process	7	0.035004	ENSRNOG00000019500	Cyp1a1	cytochrome P450, family 1, subfamily a, polypeptide 1 [Source:RGD Symbol;Acc:2458]	0.03592	0.0001	0.081544	0.280251	0.378238	0.727885	0.0847996	-3.5598	down
GO:0070988	demethylation	biological_process	4	0.035004	ENSRNOG00000019500	Cyp1a1	cytochrome P450, family 1, subfamily a, polypeptide 1 [Source:RGD Symbol;Acc:2458]	0.03592	0.0001	0.081544	0.280251	0.378238	0.727885	0.0847996	-3.5598	down
GO:0090063	positive regulation of microtubule nucleation	biological_process	11	0.035004	MSTRG.17011	Hspa1b	heat shock protein family A (Hsp70) member 1B [Source:RGD Symbol;Acc:2840]	5.24329	5.52474	2.7742	7.21687	11.7813	14.7747	0.40098	-1.3184	down
GO:0051343	positive regulation of cyclic-nucleotide phosphodiesterase activity	biological_process	8	0.035004	MSTRG.7866	Rack1	receptor for activated C kinase 1 [Source:RGD Symbol;Acc:69229]	2.12116	1.74372	0.700888	3.26988	5.21372	1.65053	0.450533	-1.15029	down
GO:1904753	negative regulation of vascular associated smooth muscle cell migration	biological_process	10	0.035004	MSTRG.7077	Adipoq	adiponectin, C1Q and collagen domain containing [Source:RGD Symbol;Acc:628748]	1.56388	0.891889	1.23395	0.20421	0.211193	0.290087	5.23001	2.38681	up
GO:0044571	[2Fe-2S] cluster assembly	biological_process	7	0.035004	MSTRG.19371	Nfs1	NFS1 cysteine desulfurase [Source:RGD Symbol;Acc:620912]	3.63526	0.0001	3.65634	0.0001	0.0001	0.0001	24305.7	14.569	up
GO:0042998	positive regulation of Golgi to plasma membrane protein transport	biological_process	10	0.035004	MSTRG.7866	Rack1	receptor for activated C kinase 1 [Source:RGD Symbol;Acc:69229]	2.12116	1.74372	0.700888	3.26988	5.21372	1.65053	0.450533	-1.15029	down
GO:2000467	positive regulation of glycogen (starch) synthase activity	biological_process	8	0.035004	MSTRG.7077	Adipoq	adiponectin, C1Q and collagen domain containing [Source:RGD Symbol;Acc:628748]	1.56388	0.891889	1.23395	0.20421	0.211193	0.290087	5.23001	2.38681	up
GO:0042904	9-cis-retinoic acid biosynthetic process	biological_process	12	0.035004	ENSRNOG00000019500	Cyp1a1	cytochrome P450, family 1, subfamily a, polypeptide 1 [Source:RGD Symbol;Acc:2458]	0.03592	0.0001	0.081544	0.280251	0.378238	0.727885	0.0847996	-3.5598	down
GO:0061205	paramesonephric duct development	biological_process	5	0.035004	MSTRG.13078	Greb1l	GREB1 like retinoic acid receptor coactivator [Source:RGD Symbol;Acc:1562371]	0.243967	0.318463	0.335822	0.11646	0.127973	0.1975	2.03255	1.02329	up
GO:0090281	negative regulation of calcium ion import	biological_process	10	0.035004	MSTRG.19523	Eppin	epididymal peptidase inhibitor [Source:RGD Symbol;Acc:1597722]	0.324507	0.145258	0.262712	0.463882	0.553782	0.5654	0.462696	-1.11186	down
GO:0071376	cellular response to corticotropin-releasing hormone stimulus	biological_process	8	0.035004	ENSRNOG00000005964	Nr4a3	nuclear receptor subfamily 4, group A, member 3 [Source:RGD Symbol;Acc:61882]	0.829097	0.535612	0.350647	0.270902	0.310903	0.258833	2.04054	1.02895	up
GO:0032606	type I interferon production	biological_process	5	0.035004	MSTRG.3425	Irf7	interferon regulatory factor 7 [Source:RGD Symbol;Acc:1307828]	3.76225	5.28163	2.92289	1.06032	1.17443	1.60451	3.11694	1.64013	up
GO:0035655	interleukin-18-mediated signaling pathway	biological_process	7	0.035004	MSTRG.29050	Il18rap	interleukin 18 receptor accessory protein [Source:RGD Symbol;Acc:727867]	3.58786	2.45648	3.08283	1.61627	1.37962	1.35237	2.09904	1.06973	up
GO:0051373	FATZ binding	molecular_function	6	0.035004	ENSRNOG00000014815	Myoz2	myozenin 2 [Source:RGD Symbol;Acc:1307669]	0.089599	0.566478	0.085301	1.18754	1.33308	0.76693	0.225511	-2.14873	down
GO:0005168	neurotrophin TRKA receptor binding	molecular_function	9	0.035004	MSTRG.25662	Frs2	fibroblast growth factor receptor substrate 2 [Source:RGD Symbol;Acc:1308201]	1.85463	2.23289	2.7624	1.887	8.46212	8.22208	0.368846	-1.43891	down
GO:0046870	cadmium ion binding	molecular_function	8	0.035004	MSTRG.13940	Mt2A	metallothionein 2A [Source:RGD Symbol;Acc:1592345]	29.572	46.2534	20.3646	9.09823	9.9753	10.0336	3.30469	1.72452	up
GO:0060267	positive regulation of respiratory burst	biological_process	7	0.035004	MSTRG.9426	Jchain	joining chain of multimeric IgA and IgM [Source:RGD Symbol;Acc:1310155]	132.362	133.248	97.0823	41.2594	54.0119	70.3597	2.18976	1.13077	up
GO:0009812	flavonoid metabolic process	biological_process	5	0.035004	ENSRNOG00000019500	Cyp1a1	cytochrome P450, family 1, subfamily a, polypeptide 1 [Source:RGD Symbol;Acc:2458]	0.03592	0.0001	0.081544	0.280251	0.378238	0.727885	0.0847996	-3.5598	down
GO:1990079	cartilage homeostasis	biological_process	8	0.035004	MSTRG.9802	Cytl1	cytokine like 1 [Source:RGD Symbol;Acc:1561846]	8.09952	20.2674	26.2093	6.62096	2.89882	3.34061	4.24375	2.08534	up
GO:0061448	connective tissue development	biological_process	6	0.035004	MSTRG.1268	Ccn2	cellular communication network factor 2 [Source:RGD Symbol;Acc:621392]	97.162	163.002	90.2827	62.7941	47.5404	55.8168	2.1092	1.0767	up
GO:0030899	calcium-dependent ATPase activity	molecular_function	11	0.035004	MSTRG.1772	Tnnt1	troponin T1, slow skeletal type [Source:RGD Symbol;Acc:621852]	0.431625	0.589243	0.648615	2.42819	2.30412	1.00538	0.290968	-1.78107	down
GO:0055131	C3HC4-type RING finger domain binding	molecular_function	6	0.035004	MSTRG.17011	Hspa1b	heat shock protein family A (Hsp70) member 1B [Source:RGD Symbol;Acc:2840]	5.24329	5.52474	2.7742	7.21687	11.7813	14.7747	0.40098	-1.3184	down
GO:0060005	vestibular reflex	biological_process	6	0.035004	ENSRNOG00000005964	Nr4a3	nuclear receptor subfamily 4, group A, member 3 [Source:RGD Symbol;Acc:61882]	0.829097	0.535612	0.350647	0.270902	0.310903	0.258833	2.04054	1.02895	up
GO:0002175	protein localization to paranode region of axon	biological_process	7	0.035004	MSTRG.19016	Mal	mal, T-cell differentiation protein [Source:RGD Symbol;Acc:3037]	1.70514	1.76004	1.8063	0.88808	0.918323	0.823618	2.00435	1.00314	up
GO:0006986	response to unfolded protein	biological_process	6	0.0373976	MSTRG.17011	Hspa1b	heat shock protein family A (Hsp70) member 1B [Source:RGD Symbol;Acc:2840]	5.24329	5.52474	2.7742	7.21687	11.7813	14.7747	0.40098	-1.3184	down
GO:0006986	response to unfolded protein	biological_process	6	0.0373976	MSTRG.6522	LOC680121	similar to heat shock protein 8 [Source:RGD Symbol;Acc:1595502]	30.1405	38.296	22.6258	32.113	23.1973	149.677	0.444234	-1.17061	down
GO:0006417	regulation of translation	biological_process	9	0.0398263	MSTRG.11358	LOC690468	similar to 60S ribosomal protein L38 [Source:RGD Symbol;Acc:1596041]	8.73527	23.9417	6.2189	7.9823	2.56257	2.99969	2.8717	1.5219	up
GO:0006417	regulation of translation	biological_process	9	0.0398263	MSTRG.16301	LOC685963	similar to 60S ribosomal protein L38 [Source:RGD Symbol;Acc:1587812]	9.62033	24.8426	7.96908	8.04825	3.22774	4.20371	2.74114	1.45478	up
GO:0006417	regulation of translation	biological_process	9	0.0398263	MSTRG.7866	Rack1	receptor for activated C kinase 1 [Source:RGD Symbol;Acc:69229]	2.12116	1.74372	0.700888	3.26988	5.21372	1.65053	0.450533	-1.15029	down
GO:0008543	fibroblast growth factor receptor signaling pathway	biological_process	8	0.0406276	MSTRG.1268	Ccn2	cellular communication network factor 2 [Source:RGD Symbol;Acc:621392]	97.162	163.002	90.2827	62.7941	47.5404	55.8168	2.1092	1.0767	up
GO:0008543	fibroblast growth factor receptor signaling pathway	biological_process	8	0.0406276	MSTRG.25662	Frs2	fibroblast growth factor receptor substrate 2 [Source:RGD Symbol;Acc:1308201]	1.85463	2.23289	2.7624	1.887	8.46212	8.22208	0.368846	-1.43891	down
GO:0045650	negative regulation of macrophage differentiation	biological_process	10	0.0418574	MSTRG.7077	Adipoq	adiponectin, C1Q and collagen domain containing [Source:RGD Symbol;Acc:628748]	1.56388	0.891889	1.23395	0.20421	0.211193	0.290087	5.23001	2.38681	up
GO:0042105	alpha-beta T cell receptor complex	cellular_component	7	0.0418574	MSTRG.27243	Cd3g	CD3g molecule [Source:RGD Symbol;Acc:1307718]	3.1597	3.36923	1.43494	0.802837	0.611571	1.27998	2.95572	1.56351	up
GO:0008595	anterior/posterior axis specification, embryo	biological_process	7	0.0418574	MSTRG.25662	Frs2	fibroblast growth factor receptor substrate 2 [Source:RGD Symbol;Acc:1308201]	1.85463	2.23289	2.7624	1.887	8.46212	8.22208	0.368846	-1.43891	down
GO:2000481	positive regulation of cAMP-dependent protein kinase activity	biological_process	13	0.0418574	MSTRG.7077	Adipoq	adiponectin, C1Q and collagen domain containing [Source:RGD Symbol;Acc:628748]	1.56388	0.891889	1.23395	0.20421	0.211193	0.290087	5.23001	2.38681	up
GO:0051155	positive regulation of striated muscle cell differentiation	biological_process	9	0.0418574	MSTRG.752	Morf4l2	mortality factor 4 like 2 [Source:RGD Symbol;Acc:1359471]	68.6344	76.9306	75.8236	18.1591	17.1081	17.1627	4.22256	2.07812	up
GO:1901318	negative regulation of flagellated sperm motility	biological_process	8	0.0418574	MSTRG.19523	Eppin	epididymal peptidase inhibitor [Source:RGD Symbol;Acc:1597722]	0.324507	0.145258	0.262712	0.463882	0.553782	0.5654	0.462696	-1.11186	down
GO:0002138	retinoic acid biosynthetic process	biological_process	11	0.0418574	MSTRG.16024	Crabp2	cellular retinoic acid binding protein 2 [Source:RGD Symbol;Acc:62070]	2.61663	8.42398	7.11811	2.96094	3.12274	2.63796	2.08203	1.05799	up
GO:0002682	regulation of immune system process	biological_process	5	0.0418574	MSTRG.22340	Orm1	orosomucoid 1 [Source:RGD Symbol;Acc:67390]	4.8938	3.42053	6.50671	1.77483	2.27479	2.66802	2.20629	1.14162	up
GO:0097201	negative regulation of transcription from RNA polymerase II promoter in response to stress	biological_process	11	0.0418574	MSTRG.17011	Hspa1b	heat shock protein family A (Hsp70) member 1B [Source:RGD Symbol;Acc:2840]	5.24329	5.52474	2.7742	7.21687	11.7813	14.7747	0.40098	-1.3184	down
GO:0043462	regulation of ATPase activity	biological_process	7	0.0418574	MSTRG.10649	Myh6	myosin heavy chain 7 [Source:RGD Symbol;Acc:62030];myosin heavy chain 6 [Source:RGD Symbol;Acc:62029]	0.997238	1.06135	0.328905	1.69535	2.31046	1.00868	0.476118	-1.07061	down
GO:0061738	late endosomal microautophagy	biological_process	7	0.0418574	MSTRG.6522	LOC680121	similar to heat shock protein 8 [Source:RGD Symbol;Acc:1595502]	30.1405	38.296	22.6258	32.113	23.1973	149.677	0.444234	-1.17061	down
GO:0051434	BH3 domain binding	molecular_function	7	0.0418574	MSTRG.7866	Rack1	receptor for activated C kinase 1 [Source:RGD Symbol;Acc:69229]	2.12116	1.74372	0.700888	3.26988	5.21372	1.65053	0.450533	-1.15029	down
GO:0016338	calcium-independent cell-cell adhesion via plasma membrane cell-adhesion molecules	biological_process	7	0.0418574	ENSRNOG00000001926	Cldn1	claudin 1 [Source:RGD Symbol;Acc:68422]	0.488957	0.588734	0.237891	0.155539	0.268818	0.188699	2.14594	1.10161	up
GO:0035473	lipase binding	molecular_function	6	0.0418574	MSTRG.26142	Gpihbp1	glycosylphosphatidylinositol anchored high density lipoprotein binding protein 1 [Source:RGD Symbol;Acc:1564237]	2.63219	2.08795	1.30847	0.676363	0.879262	1.01499	2.3452	1.22971	up
GO:0009249	protein lipoylation	biological_process	10	0.0418574	MSTRG.2812	Lipt2	lipoyl(octanoyl) transferase 2 [Source:RGD Symbol;Acc:1305211]	0.283157	0.506009	0.480529	0.88151	1.24304	0.745033	0.442466	-1.17636	down
GO:0032451	demethylase activity	molecular_function	4	0.0418574	ENSRNOG00000019500	Cyp1a1	cytochrome P450, family 1, subfamily a, polypeptide 1 [Source:RGD Symbol;Acc:2458]	0.03592	0.0001	0.081544	0.280251	0.378238	0.727885	0.0847996	-3.5598	down
GO:0036016	cellular response to interleukin-3	biological_process	8	0.0418574	MSTRG.13940	Mt2A	metallothionein 2A [Source:RGD Symbol;Acc:1592345]	29.572	46.2534	20.3646	9.09823	9.9753	10.0336	3.30469	1.72452	up
GO:0048385	regulation of retinoic acid receptor signaling pathway	biological_process	8	0.0418574	MSTRG.16024	Crabp2	cellular retinoic acid binding protein 2 [Source:RGD Symbol;Acc:62070]	2.61663	8.42398	7.11811	2.96094	3.12274	2.63796	2.08203	1.05799	up
GO:0045906	negative regulation of vasoconstriction	biological_process	10	0.0418574	MSTRG.17011	Hspa1b	heat shock protein family A (Hsp70) member 1B [Source:RGD Symbol;Acc:2840]	5.24329	5.52474	2.7742	7.21687	11.7813	14.7747	0.40098	-1.3184	down
GO:0072318	clathrin coat disassembly	biological_process	10	0.0418574	MSTRG.6522	LOC680121	similar to heat shock protein 8 [Source:RGD Symbol;Acc:1595502]	30.1405	38.296	22.6258	32.113	23.1973	149.677	0.444234	-1.17061	down
GO:0009986	cell surface	cellular_component	4	0.047452	ENSRNOG00000001739	Meltf	melanotransferrin [Source:RGD Symbol;Acc:1308155]	0.547705	1.43145	0.847265	0.639556	0.295855	0.228587	2.4282	1.27989	up
GO:0009986	cell surface	cellular_component	4	0.047452	ENSRNOG00000045816	Gria1	glutamate ionotropic receptor AMPA type subunit 1 [Source:RGD Symbol;Acc:621531]	0.153662	0.0781212	0.0762892	0.328888	0.272742	0.303107	0.34051	-1.55423	down
GO:0009986	cell surface	cellular_component	4	0.047452	MSTRG.19523	Eppin	epididymal peptidase inhibitor [Source:RGD Symbol;Acc:1597722]	0.324507	0.145258	0.262712	0.463882	0.553782	0.5654	0.462696	-1.11186	down
GO:0009986	cell surface	cellular_component	4	0.047452	MSTRG.21375	Klrk1	killer cell lectin like receptor K1 [Source:RGD Symbol;Acc:3180]	3.23628	1.16965	1.88792	0.905104	0.662451	1.16837	2.30045	1.20191	up
GO:0009986	cell surface	cellular_component	4	0.047452	MSTRG.24842	AABR07065651	immunoglobulin heavy constant mu [Source:MGI Symbol;Acc:MGI:96448];immunoglobulin heavy chain 6 [Source:RGD Symbol;Acc:1359202]	108.546	104.979	81.0806	35.3749	47.6802	61.9222	2.03209	1.02296	up
GO:0009986	cell surface	cellular_component	4	0.047452	MSTRG.26142	Gpihbp1	glycosylphosphatidylinositol anchored high density lipoprotein binding protein 1 [Source:RGD Symbol;Acc:1564237]	2.63219	2.08795	1.30847	0.676363	0.879262	1.01499	2.3452	1.22971	up
GO:0009986	cell surface	cellular_component	4	0.047452	MSTRG.27342	Cryab	crystallin, alpha B [Source:RGD Symbol;Acc:2414]	4.40167	3.16475	1.93664	6.6383	11.8965	6.47058	0.380041	-1.39577	down
GO:0009986	cell surface	cellular_component	4	0.047452	MSTRG.7077	Adipoq	adiponectin, C1Q and collagen domain containing [Source:RGD Symbol;Acc:628748]	1.56388	0.891889	1.23395	0.20421	0.211193	0.290087	5.23001	2.38681	up
GO:0003231	cardiac ventricle development	biological_process	6	0.0486625	MSTRG.13078	Greb1l	GREB1 like retinoic acid receptor coactivator [Source:RGD Symbol;Acc:1562371]	0.243967	0.318463	0.335822	0.11646	0.127973	0.1975	2.03255	1.02329	up
GO:0060054	positive regulation of epithelial cell proliferation involved in wound healing	biological_process	9	0.0486625	ENSRNOG00000001926	Cldn1	claudin 1 [Source:RGD Symbol;Acc:68422]	0.488957	0.588734	0.237891	0.155539	0.268818	0.188699	2.14594	1.10161	up
GO:0071813	lipoprotein particle binding	molecular_function	6	0.0486625	MSTRG.26142	Gpihbp1	glycosylphosphatidylinositol anchored high density lipoprotein binding protein 1 [Source:RGD Symbol;Acc:1564237]	2.63219	2.08795	1.30847	0.676363	0.879262	1.01499	2.3452	1.22971	up
GO:0005068	transmembrane receptor protein tyrosine kinase adaptor activity	molecular_function	8	0.0486625	MSTRG.25662	Frs2	fibroblast growth factor receptor substrate 2 [Source:RGD Symbol;Acc:1308201]	1.85463	2.23289	2.7624	1.887	8.46212	8.22208	0.368846	-1.43891	down
GO:0031995	insulin-like growth factor II binding	molecular_function	7	0.0486625	MSTRG.29376	Igfbp2	insulin-like growth factor binding protein 2 [Source:RGD Symbol;Acc:2873]	0.073613	0.214964	0.510057	2.1311	1.26299	0.635682	0.198184	-2.33509	down
GO:2000726	negative regulation of cardiac muscle cell differentiation	biological_process	10	0.0486625	MSTRG.25662	Frs2	fibroblast growth factor receptor substrate 2 [Source:RGD Symbol;Acc:1308201]	1.85463	2.23289	2.7624	1.887	8.46212	8.22208	0.368846	-1.43891	down
GO:0035336	long-chain fatty-acyl-CoA metabolic process	biological_process	9	0.0486625	MSTRG.21596	Far2	fatty acyl CoA reductase 2 [Source:RGD Symbol;Acc:1565966]	4.70552	2.47182	3.21356	1.81247	1.36236	1.33524	2.30393	1.2041	up
GO:0046321	positive regulation of fatty acid oxidation	biological_process	10	0.0486625	ENSRNOG00000005964	Nr4a3	nuclear receptor subfamily 4, group A, member 3 [Source:RGD Symbol;Acc:61882]	0.829097	0.535612	0.350647	0.270902	0.310903	0.258833	2.04054	1.02895	up
GO:0002819	regulation of adaptive immune response	biological_process	7	0.0486625	MSTRG.3425	Irf7	interferon regulatory factor 7 [Source:RGD Symbol;Acc:1307828]	3.76225	5.28163	2.92289	1.06032	1.17443	1.60451	3.11694	1.64013	up
GO:0048752	semicircular canal morphogenesis	biological_process	6	0.0486625	ENSRNOG00000005964	Nr4a3	nuclear receptor subfamily 4, group A, member 3 [Source:RGD Symbol;Acc:61882]	0.829097	0.535612	0.350647	0.270902	0.310903	0.258833	2.04054	1.02895	up
GO:0008391	arachidonic acid monooxygenase activity	molecular_function	6	0.0486625	ENSRNOG00000019500	Cyp1a1	cytochrome P450, family 1, subfamily a, polypeptide 1 [Source:RGD Symbol;Acc:2458]	0.03592	0.0001	0.081544	0.280251	0.378238	0.727885	0.0847996	-3.5598	down
GO:0072177	mesonephric duct development	biological_process	7	0.0486625	MSTRG.13078	Greb1l	GREB1 like retinoic acid receptor coactivator [Source:RGD Symbol;Acc:1562371]	0.243967	0.318463	0.335822	0.11646	0.127973	0.1975	2.03255	1.02329	up
GO:0097100	supercoiled DNA binding	molecular_function	8	0.0486625	MSTRG.1247	RGD1559962	similar to High mobility group protein 2 (HMG-2) [Source:RGD Symbol;Acc:1559962]	2.0089	1.58098	1.57628	1.87562	4.21377	5.19355	0.457874	-1.12698	down
GO:0072344	rescue of stalled ribosome	biological_process	9	0.0486625	MSTRG.7866	Rack1	receptor for activated C kinase 1 [Source:RGD Symbol;Acc:69229]	2.12116	1.74372	0.700888	3.26988	5.21372	1.65053	0.450533	-1.15029	down
GO:0048739	cardiac muscle fiber development	biological_process	9	0.0486625	MSTRG.10649	Myh6	myosin heavy chain 7 [Source:RGD Symbol;Acc:62030];myosin heavy chain 6 [Source:RGD Symbol;Acc:62029]	0.997238	1.06135	0.328905	1.69535	2.31046	1.00868	0.476118	-1.07061	down
GO:0060561	apoptotic process involved in morphogenesis	biological_process	8	0.0486625	MSTRG.27342	Cryab	crystallin, alpha B [Source:RGD Symbol;Acc:2414]	4.40167	3.16475	1.93664	6.6383	11.8965	6.47058	0.380041	-1.39577	down
GO:0061741	chaperone-mediated protein transport involved in chaperone-mediated autophagy	biological_process	11	0.0486625	MSTRG.6522	LOC680121	similar to heat shock protein 8 [Source:RGD Symbol;Acc:1595502]	30.1405	38.296	22.6258	32.113	23.1973	149.677	0.444234	-1.17061	down
GO:0007171	activation of transmembrane receptor protein tyrosine kinase activity	biological_process	13	0.0486625	ENSRNOG00000005008	Angpt4	angiopoietin 4 [Source:RGD Symbol;Acc:1307539]	0.957383	0.605696	0.869505	0.442478	0.367232	0.262644	2.26845	1.18171	up
GO:0070307	lens fiber cell development	biological_process	7	0.0486625	MSTRG.25662	Frs2	fibroblast growth factor receptor substrate 2 [Source:RGD Symbol;Acc:1308201]	1.85463	2.23289	2.7624	1.887	8.46212	8.22208	0.368846	-1.43891	down
GO:2000543	positive regulation of gastrulation	biological_process	8	0.0486625	MSTRG.7866	Rack1	receptor for activated C kinase 1 [Source:RGD Symbol;Acc:69229]	2.12116	1.74372	0.700888	3.26988	5.21372	1.65053	0.450533	-1.15029	down
GO:0060527	prostate epithelial cord arborization involved in prostate glandular acinus morphogenesis	biological_process	9	0.0486625	MSTRG.25662	Frs2	fibroblast growth factor receptor substrate 2 [Source:RGD Symbol;Acc:1308201]	1.85463	2.23289	2.7624	1.887	8.46212	8.22208	0.368846	-1.43891	down
GO:0006072	glycerol-3-phosphate metabolic process	biological_process	8	0.0486625	MSTRG.26667	Gpd1	glycerol-3-phosphate dehydrogenase 1 [Source:RGD Symbol;Acc:621381]	2.5	0.764599	1.04927	0.560462	0.529418	0.458827	2.78547	1.47792	up
GO:0044214	spanning component of plasma membrane	cellular_component	7	0.0486625	ENSRNOG00000020872	Cd5	Cd5 molecule [Source:RGD Symbol;Acc:2309]	0.577905	0.540254	0.25983	0.0973373	0.177983	0.267674	2.53776	1.34356	up
GO:1903348	positive regulation of bicellular tight junction assembly	biological_process	8	0.0486625	ENSRNOG00000001926	Cldn1	claudin 1 [Source:RGD Symbol;Acc:68422]	0.488957	0.588734	0.237891	0.155539	0.268818	0.188699	2.14594	1.10161	up
GO:0010745	negative regulation of macrophage derived foam cell differentiation	biological_process	8	0.0486625	MSTRG.7077	Adipoq	adiponectin, C1Q and collagen domain containing [Source:RGD Symbol;Acc:628748]	1.56388	0.891889	1.23395	0.20421	0.211193	0.290087	5.23001	2.38681	up
GO:0010756	positive regulation of plasminogen activation	biological_process	11	0.0486625	ENSRNOG00000001739	Meltf	melanotransferrin [Source:RGD Symbol;Acc:1308155]	0.547705	1.43145	0.847265	0.639556	0.295855	0.228587	2.4282	1.27989	up
GO:0030308	negative regulation of cell growth	biological_process	7	0.0487103	MSTRG.17011	Hspa1b	heat shock protein family A (Hsp70) member 1B [Source:RGD Symbol;Acc:2840]	5.24329	5.52474	2.7742	7.21687	11.7813	14.7747	0.40098	-1.3184	down
GO:0030308	negative regulation of cell growth	biological_process	7	0.0487103	MSTRG.27342	Cryab	crystallin, alpha B [Source:RGD Symbol;Acc:2414]	4.40167	3.16475	1.93664	6.6383	11.8965	6.47058	0.380041	-1.39577	down
GO:0030308	negative regulation of cell growth	biological_process	7	0.0487103	MSTRG.7866	Rack1	receptor for activated C kinase 1 [Source:RGD Symbol;Acc:69229]	2.12116	1.74372	0.700888	3.26988	5.21372	1.65053	0.450533	-1.15029	down
GO:0032757	positive regulation of interleukin-8 production	biological_process	8	0.0509116	MSTRG.17011	Hspa1b	heat shock protein family A (Hsp70) member 1B [Source:RGD Symbol;Acc:2840]	5.24329	5.52474	2.7742	7.21687	11.7813	14.7747	0.40098	-1.3184	down
GO:0032757	positive regulation of interleukin-8 production	biological_process	8	0.0509116	MSTRG.7077	Adipoq	adiponectin, C1Q and collagen domain containing [Source:RGD Symbol;Acc:628748]	1.56388	0.891889	1.23395	0.20421	0.211193	0.290087	5.23001	2.38681	up
GO:0002376	immune system process	biological_process	3	0.0528552	ENSRNOG00000049282	Oas2	2'-5' oligoadenylate synthetase 2 [Source:RGD Symbol;Acc:1359697]	1.13584	0.796252	0.431963	0.36197	0.392657	0.369048	2.10386	1.07304	up
GO:0002376	immune system process	biological_process	3	0.0528552	MSTRG.1247	RGD1559962	similar to High mobility group protein 2 (HMG-2) [Source:RGD Symbol;Acc:1559962]	2.0089	1.58098	1.57628	1.87562	4.21377	5.19355	0.457874	-1.12698	down
GO:0002376	immune system process	biological_process	3	0.0528552	MSTRG.21375	Klrk1	killer cell lectin like receptor K1 [Source:RGD Symbol;Acc:3180]	3.23628	1.16965	1.88792	0.905104	0.662451	1.16837	2.30045	1.20191	up
GO:0002376	immune system process	biological_process	3	0.0528552	MSTRG.3425	Irf7	interferon regulatory factor 7 [Source:RGD Symbol;Acc:1307828]	3.76225	5.28163	2.92289	1.06032	1.17443	1.60451	3.11694	1.64013	up
GO:0016323	basolateral plasma membrane	cellular_component	5	0.0544601	ENSRNOG00000001926	Cldn1	claudin 1 [Source:RGD Symbol;Acc:68422]	0.488957	0.588734	0.237891	0.155539	0.268818	0.188699	2.14594	1.10161	up
GO:0016323	basolateral plasma membrane	cellular_component	5	0.0544601	ENSRNOG00000003972	Tshr	thyroid stimulating hormone receptor [Source:RGD Symbol;Acc:3911]	0.489374	0.184589	0.289544	0.094947	0.190353	0.167872	2.12614	1.08824	up
GO:0016323	basolateral plasma membrane	cellular_component	5	0.0544601	MSTRG.17011	Hspa1b	heat shock protein family A (Hsp70) member 1B [Source:RGD Symbol;Acc:2840]	5.24329	5.52474	2.7742	7.21687	11.7813	14.7747	0.40098	-1.3184	down
GO:0016323	basolateral plasma membrane	cellular_component	5	0.0544601	MSTRG.26142	Gpihbp1	glycosylphosphatidylinositol anchored high density lipoprotein binding protein 1 [Source:RGD Symbol;Acc:1564237]	2.63219	2.08795	1.30847	0.676363	0.879262	1.01499	2.3452	1.22971	up
GO:0010642	negative regulation of platelet-derived growth factor receptor signaling pathway	biological_process	9	0.0554196	MSTRG.7077	Adipoq	adiponectin, C1Q and collagen domain containing [Source:RGD Symbol;Acc:628748]	1.56388	0.891889	1.23395	0.20421	0.211193	0.290087	5.23001	2.38681	up
GO:0090091	positive regulation of extracellular matrix disassembly	biological_process	9	0.0554196	ENSRNOG00000001739	Meltf	melanotransferrin [Source:RGD Symbol;Acc:1308155]	0.547705	1.43145	0.847265	0.639556	0.295855	0.228587	2.4282	1.27989	up
GO:0070100	negative regulation of chemokine-mediated signaling pathway	biological_process	10	0.0554196	MSTRG.860	Rnf113a1	ring finger protein 113A1 [Source:RGD Symbol;Acc:1359693]	1.82938	1.04395	2.2839	0.897504	0.407751	0.592646	2.71734	1.44219	up
GO:0033292	T-tubule organization	biological_process	6	0.0554196	MSTRG.2394	Csrp3	cysteine and glycine rich protein 3 [Source:RGD Symbol;Acc:71092]	0.636871	1.03978	0.697614	1.76671	2.35583	1.56165	0.417697	-1.25947	down
GO:0055009	atrial cardiac muscle tissue morphogenesis	biological_process	8	0.0554196	MSTRG.10649	Myh6	myosin heavy chain 7 [Source:RGD Symbol;Acc:62030];myosin heavy chain 6 [Source:RGD Symbol;Acc:62029]	0.997238	1.06135	0.328905	1.69535	2.31046	1.00868	0.476118	-1.07061	down
GO:0009635	response to herbicide	biological_process	5	0.0554196	ENSRNOG00000019500	Cyp1a1	cytochrome P450, family 1, subfamily a, polypeptide 1 [Source:RGD Symbol;Acc:2458]	0.03592	0.0001	0.081544	0.280251	0.378238	0.727885	0.0847996	-3.5598	down
GO:0009308	amine metabolic process	biological_process	6	0.0554196	ENSRNOG00000019500	Cyp1a1	cytochrome P450, family 1, subfamily a, polypeptide 1 [Source:RGD Symbol;Acc:2458]	0.03592	0.0001	0.081544	0.280251	0.378238	0.727885	0.0847996	-3.5598	down
GO:0047499	calcium-independent phospholipase A2 activity	molecular_function	9	0.0554196	ENSRNOG00000026764	Pla2g4c	phospholipase A2 group IVC [Source:RGD Symbol;Acc:1594658]	0.486308	0.281544	0.148092	0.0390525	0.0591423	0.217515	2.90122	1.53666	up
GO:0002860	positive regulation of natural killer cell mediated cytotoxicity directed against tumor cell target	biological_process	12	0.0554196	MSTRG.21375	Klrk1	killer cell lectin like receptor K1 [Source:RGD Symbol;Acc:3180]	3.23628	1.16965	1.88792	0.905104	0.662451	1.16837	2.30045	1.20191	up
GO:0010882	regulation of cardiac muscle contraction by calcium ion signaling	biological_process	8	0.0554196	MSTRG.1771	Tnni3	dynein, axonemal, assembly factor 3 [Source:RGD Symbol;Acc:2323487];troponin I3, cardiac type [Source:RGD Symbol;Acc:62052]	0.232226	0.361112	0.142345	0.656005	0.490498	0.460709	0.457739	-1.1274	down
GO:0009744	response to sucrose	biological_process	8	0.0554196	MSTRG.7077	Adipoq	adiponectin, C1Q and collagen domain containing [Source:RGD Symbol;Acc:628748]	1.56388	0.891889	1.23395	0.20421	0.211193	0.290087	5.23001	2.38681	up
GO:0061469	regulation of type B pancreatic cell proliferation	biological_process	8	0.0554196	ENSRNOG00000005964	Nr4a3	nuclear receptor subfamily 4, group A, member 3 [Source:RGD Symbol;Acc:61882]	0.829097	0.535612	0.350647	0.270902	0.310903	0.258833	2.04054	1.02895	up
GO:0016500	protein-hormone receptor activity	molecular_function	5	0.0554196	ENSRNOG00000003972	Tshr	thyroid stimulating hormone receptor [Source:RGD Symbol;Acc:3911]	0.489374	0.184589	0.289544	0.094947	0.190353	0.167872	2.12614	1.08824	up
GO:0042538	hyperosmotic salinity response	biological_process	7	0.0554196	ENSRNOG00000001926	Cldn1	claudin 1 [Source:RGD Symbol;Acc:68422]	0.488957	0.588734	0.237891	0.155539	0.268818	0.188699	2.14594	1.10161	up
GO:0010273	detoxification of copper ion	biological_process	5	0.0554196	MSTRG.13940	Mt2A	metallothionein 2A [Source:RGD Symbol;Acc:1592345]	29.572	46.2534	20.3646	9.09823	9.9753	10.0336	3.30469	1.72452	up
GO:0043567	regulation of insulin-like growth factor receptor signaling pathway	biological_process	8	0.0554196	MSTRG.29376	Igfbp2	insulin-like growth factor binding protein 2 [Source:RGD Symbol;Acc:2873]	0.073613	0.214964	0.510057	2.1311	1.26299	0.635682	0.198184	-2.33509	down
GO:0050650	chondroitin sulfate proteoglycan biosynthetic process	biological_process	10	0.0554196	MSTRG.9802	Cytl1	cytokine like 1 [Source:RGD Symbol;Acc:1561846]	8.09952	20.2674	26.2093	6.62096	2.89882	3.34061	4.24375	2.08534	up
GO:0001730	2'-5'-oligoadenylate synthetase activity	molecular_function	8	0.0554196	ENSRNOG00000049282	Oas2	2'-5' oligoadenylate synthetase 2 [Source:RGD Symbol;Acc:1359697]	1.13584	0.796252	0.431963	0.36197	0.392657	0.369048	2.10386	1.07304	up
GO:0040012	regulation of locomotion	biological_process	5	0.0554196	ENSRNOG00000003972	Tshr	thyroid stimulating hormone receptor [Source:RGD Symbol;Acc:3911]	0.489374	0.184589	0.289544	0.094947	0.190353	0.167872	2.12614	1.08824	up
GO:0042788	polysomal ribosome	cellular_component	7	0.0601119	MSTRG.11358	LOC690468	similar to 60S ribosomal protein L38 [Source:RGD Symbol;Acc:1596041]	8.73527	23.9417	6.2189	7.9823	2.56257	2.99969	2.8717	1.5219	up
GO:0042788	polysomal ribosome	cellular_component	7	0.0601119	MSTRG.16301	LOC685963	similar to 60S ribosomal protein L38 [Source:RGD Symbol;Acc:1587812]	9.62033	24.8426	7.96908	8.04825	3.22774	4.20371	2.74114	1.45478	up
GO:0030853	negative regulation of granulocyte differentiation	biological_process	10	0.0621289	MSTRG.7077	Adipoq	adiponectin, C1Q and collagen domain containing [Source:RGD Symbol;Acc:628748]	1.56388	0.891889	1.23395	0.20421	0.211193	0.290087	5.23001	2.38681	up
GO:0006265	DNA topological change	biological_process	8	0.0621289	MSTRG.1247	RGD1559962	similar to High mobility group protein 2 (HMG-2) [Source:RGD Symbol;Acc:1559962]	2.0089	1.58098	1.57628	1.87562	4.21377	5.19355	0.457874	-1.12698	down
GO:0007263	nitric oxide mediated signal transduction	biological_process	7	0.0621289	MSTRG.13940	Mt2A	metallothionein 2A [Source:RGD Symbol;Acc:1592345]	29.572	46.2534	20.3646	9.09823	9.9753	10.0336	3.30469	1.72452	up
GO:0006518	peptide metabolic process	biological_process	7	0.0621289	MSTRG.10688	Cma1	chymase 1 [Source:RGD Symbol;Acc:2365]	4.6429	2.56201	3.59294	1.91197	1.46093	1.90488	2.04591	1.03274	up
GO:0010828	positive regulation of glucose transmembrane transport	biological_process	9	0.0621289	ENSRNOG00000005964	Nr4a3	nuclear receptor subfamily 4, group A, member 3 [Source:RGD Symbol;Acc:61882]	0.829097	0.535612	0.350647	0.270902	0.310903	0.258833	2.04054	1.02895	up
GO:1903053	regulation of extracellular matrix organization	biological_process	7	0.0621289	MSTRG.23343	Angptl7	angiopoietin like 7 [Source:RGD Symbol;Acc:7553363]	7.81835	7.9259	4.33571	2.35398	2.94155	2.14646	2.6982	1.432	up
GO:0050665	hydrogen peroxide biosynthetic process	biological_process	8	0.0621289	ENSRNOG00000019500	Cyp1a1	cytochrome P450, family 1, subfamily a, polypeptide 1 [Source:RGD Symbol;Acc:2458]	0.03592	0.0001	0.081544	0.280251	0.378238	0.727885	0.0847996	-3.5598	down
GO:0009404	toxin metabolic process	biological_process	5	0.0621289	ENSRNOG00000019500	Cyp1a1	cytochrome P450, family 1, subfamily a, polypeptide 1 [Source:RGD Symbol;Acc:2458]	0.03592	0.0001	0.081544	0.280251	0.378238	0.727885	0.0847996	-3.5598	down
GO:0048672	positive regulation of collateral sprouting	biological_process	8	0.0621289	MSTRG.16024	Crabp2	cellular retinoic acid binding protein 2 [Source:RGD Symbol;Acc:62070]	2.61663	8.42398	7.11811	2.96094	3.12274	2.63796	2.08203	1.05799	up
GO:0034115	negative regulation of heterotypic cell-cell adhesion	biological_process	8	0.0621289	MSTRG.7077	Adipoq	adiponectin, C1Q and collagen domain containing [Source:RGD Symbol;Acc:628748]	1.56388	0.891889	1.23395	0.20421	0.211193	0.290087	5.23001	2.38681	up
GO:0005684	U2-type spliceosomal complex	cellular_component	7	0.0621289	MSTRG.860	Rnf113a1	ring finger protein 113A1 [Source:RGD Symbol;Acc:1359693]	1.82938	1.04395	2.2839	0.897504	0.407751	0.592646	2.71734	1.44219	up
GO:0034383	low-density lipoprotein particle clearance	biological_process	5	0.0621289	MSTRG.7077	Adipoq	adiponectin, C1Q and collagen domain containing [Source:RGD Symbol;Acc:628748]	1.56388	0.891889	1.23395	0.20421	0.211193	0.290087	5.23001	2.38681	up
GO:1900121	negative regulation of receptor binding	biological_process	8	0.0621289	MSTRG.7077	Adipoq	adiponectin, C1Q and collagen domain containing [Source:RGD Symbol;Acc:628748]	1.56388	0.891889	1.23395	0.20421	0.211193	0.290087	5.23001	2.38681	up
GO:0008035	high-density lipoprotein particle binding	molecular_function	7	0.0621289	MSTRG.26142	Gpihbp1	glycosylphosphatidylinositol anchored high density lipoprotein binding protein 1 [Source:RGD Symbol;Acc:1564237]	2.63219	2.08795	1.30847	0.676363	0.879262	1.01499	2.3452	1.22971	up
GO:0060137	maternal process involved in parturition	biological_process	5	0.0621289	ENSRNOG00000019500	Cyp1a1	cytochrome P450, family 1, subfamily a, polypeptide 1 [Source:RGD Symbol;Acc:2458]	0.03592	0.0001	0.081544	0.280251	0.378238	0.727885	0.0847996	-3.5598	down
GO:0010941	regulation of cell death	biological_process	6	0.0621289	MSTRG.27342	Cryab	crystallin, alpha B [Source:RGD Symbol;Acc:2414]	4.40167	3.16475	1.93664	6.6383	11.8965	6.47058	0.380041	-1.39577	down
GO:0019841	retinol binding	molecular_function	7	0.0621289	MSTRG.16024	Crabp2	cellular retinoic acid binding protein 2 [Source:RGD Symbol;Acc:62070]	2.61663	8.42398	7.11811	2.96094	3.12274	2.63796	2.08203	1.05799	up
GO:0032432	actin filament bundle	cellular_component	6	0.0621289	MSTRG.27342	Cryab	crystallin, alpha B [Source:RGD Symbol;Acc:2414]	4.40167	3.16475	1.93664	6.6383	11.8965	6.47058	0.380041	-1.39577	down
GO:0035726	common myeloid progenitor cell proliferation	biological_process	4	0.0621289	ENSRNOG00000005964	Nr4a3	nuclear receptor subfamily 4, group A, member 3 [Source:RGD Symbol;Acc:61882]	0.829097	0.535612	0.350647	0.270902	0.310903	0.258833	2.04054	1.02895	up
GO:0051006	positive regulation of lipoprotein lipase activity	biological_process	9	0.0621289	MSTRG.26142	Gpihbp1	glycosylphosphatidylinositol anchored high density lipoprotein binding protein 1 [Source:RGD Symbol;Acc:1564237]	2.63219	2.08795	1.30847	0.676363	0.879262	1.01499	2.3452	1.22971	up
GO:0010226	response to lithium ion	biological_process	7	0.0621289	MSTRG.29376	Igfbp2	insulin-like growth factor binding protein 2 [Source:RGD Symbol;Acc:2873]	0.073613	0.214964	0.510057	2.1311	1.26299	0.635682	0.198184	-2.33509	down
GO:0008088	axo-dendritic transport	biological_process	9	0.0621289	MSTRG.6522	LOC680121	similar to heat shock protein 8 [Source:RGD Symbol;Acc:1595502]	30.1405	38.296	22.6258	32.113	23.1973	149.677	0.444234	-1.17061	down
GO:0032330	regulation of chondrocyte differentiation	biological_process	7	0.0621289	MSTRG.1268	Ccn2	cellular communication network factor 2 [Source:RGD Symbol;Acc:621392]	97.162	163.002	90.2827	62.7941	47.5404	55.8168	2.1092	1.0767	up
GO:0016307	phosphatidylinositol phosphate kinase activity	molecular_function	7	0.0621289	MSTRG.12982	AABR07028795		3.72587	3.84149	3.80138	1.79371	1.60476	1.97497	2.11573	1.08116	up
GO:0042542	response to hydrogen peroxide	biological_process	7	0.0639402	ENSRNOG00000005964	Nr4a3	nuclear receptor subfamily 4, group A, member 3 [Source:RGD Symbol;Acc:61882]	0.829097	0.535612	0.350647	0.270902	0.310903	0.258833	2.04054	1.02895	up
GO:0042542	response to hydrogen peroxide	biological_process	7	0.0639402	MSTRG.27342	Cryab	crystallin, alpha B [Source:RGD Symbol;Acc:2414]	4.40167	3.16475	1.93664	6.6383	11.8965	6.47058	0.380041	-1.39577	down
GO:0030971	receptor tyrosine kinase binding	molecular_function	6	0.0658846	ENSRNOG00000005008	Angpt4	angiopoietin 4 [Source:RGD Symbol;Acc:1307539]	0.957383	0.605696	0.869505	0.442478	0.367232	0.262644	2.26845	1.18171	up
GO:0030971	receptor tyrosine kinase binding	molecular_function	6	0.0658846	MSTRG.7866	Rack1	receptor for activated C kinase 1 [Source:RGD Symbol;Acc:69229]	2.12116	1.74372	0.700888	3.26988	5.21372	1.65053	0.450533	-1.15029	down
GO:0045766	positive regulation of angiogenesis	biological_process	8	0.066663	ENSRNOG00000005008	Angpt4	angiopoietin 4 [Source:RGD Symbol;Acc:1307539]	0.957383	0.605696	0.869505	0.442478	0.367232	0.262644	2.26845	1.18171	up
GO:0045766	positive regulation of angiogenesis	biological_process	8	0.066663	ENSRNOG00000006736	Ccr3	C-C motif chemokine receptor 3 [Source:RGD Symbol;Acc:620593]	0.539265	0.662872	0.240814	0.156602	0.179279	0.329123	2.16984	1.11759	up
GO:0045766	positive regulation of angiogenesis	biological_process	8	0.066663	MSTRG.10688	Cma1	chymase 1 [Source:RGD Symbol;Acc:2365]	4.6429	2.56201	3.59294	1.91197	1.46093	1.90488	2.04591	1.03274	up
GO:0071320	cellular response to cAMP	biological_process	9	0.0678486	MSTRG.26667	Gpd1	glycerol-3-phosphate dehydrogenase 1 [Source:RGD Symbol;Acc:621381]	2.5	0.764599	1.04927	0.560462	0.529418	0.458827	2.78547	1.47792	up
GO:0071320	cellular response to cAMP	biological_process	9	0.0678486	MSTRG.7077	Adipoq	adiponectin, C1Q and collagen domain containing [Source:RGD Symbol;Acc:628748]	1.56388	0.891889	1.23395	0.20421	0.211193	0.290087	5.23001	2.38681	up
GO:0045926	negative regulation of growth	biological_process	6	0.068791	MSTRG.13940	Mt2A	metallothionein 2A [Source:RGD Symbol;Acc:1592345]	29.572	46.2534	20.3646	9.09823	9.9753	10.0336	3.30469	1.72452	up
GO:0099566	regulation of postsynaptic cytosolic calcium ion concentration	biological_process	13	0.068791	ENSRNOG00000045816	Gria1	glutamate ionotropic receptor AMPA type subunit 1 [Source:RGD Symbol;Acc:621531]	0.153662	0.0781212	0.0762892	0.328888	0.272742	0.303107	0.34051	-1.55423	down
GO:0046475	glycerophospholipid catabolic process	biological_process	9	0.068791	ENSRNOG00000026764	Pla2g4c	phospholipase A2 group IVC [Source:RGD Symbol;Acc:1594658]	0.486308	0.281544	0.148092	0.0390525	0.0591423	0.217515	2.90122	1.53666	up
GO:0090557	establishment of endothelial intestinal barrier	biological_process	9	0.068791	ENSRNOG00000001926	Cldn1	claudin 1 [Source:RGD Symbol;Acc:68422]	0.488957	0.588734	0.237891	0.155539	0.268818	0.188699	2.14594	1.10161	up
GO:0008656	cysteine-type endopeptidase activator activity involved in apoptotic process	molecular_function	8	0.068791	MSTRG.7866	Rack1	receptor for activated C kinase 1 [Source:RGD Symbol;Acc:69229]	2.12116	1.74372	0.700888	3.26988	5.21372	1.65053	0.450533	-1.15029	down
GO:0090084	negative regulation of inclusion body assembly	biological_process	8	0.068791	MSTRG.17011	Hspa1b	heat shock protein family A (Hsp70) member 1B [Source:RGD Symbol;Acc:2840]	5.24329	5.52474	2.7742	7.21687	11.7813	14.7747	0.40098	-1.3184	down
GO:1903265	positive regulation of tumor necrosis factor-mediated signaling pathway	biological_process	10	0.068791	MSTRG.17011	Hspa1b	heat shock protein family A (Hsp70) member 1B [Source:RGD Symbol;Acc:2840]	5.24329	5.52474	2.7742	7.21687	11.7813	14.7747	0.40098	-1.3184	down
GO:0044309	neuron spine	cellular_component	6	0.068791	ENSRNOG00000045816	Gria1	glutamate ionotropic receptor AMPA type subunit 1 [Source:RGD Symbol;Acc:621531]	0.153662	0.0781212	0.0762892	0.328888	0.272742	0.303107	0.34051	-1.55423	down
GO:0055003	cardiac myofibril assembly	biological_process	8	0.068791	MSTRG.2394	Csrp3	cysteine and glycine rich protein 3 [Source:RGD Symbol;Acc:71092]	0.636871	1.03978	0.697614	1.76671	2.35583	1.56165	0.417697	-1.25947	down
GO:0050805	negative regulation of synaptic transmission	biological_process	8	0.068791	MSTRG.7077	Adipoq	adiponectin, C1Q and collagen domain containing [Source:RGD Symbol;Acc:628748]	1.56388	0.891889	1.23395	0.20421	0.211193	0.290087	5.23001	2.38681	up
GO:0019855	calcium channel inhibitor activity	molecular_function	7	0.068791	MSTRG.1771	Tnni3	dynein, axonemal, assembly factor 3 [Source:RGD Symbol;Acc:2323487];troponin I3, cardiac type [Source:RGD Symbol;Acc:62052]	0.232226	0.361112	0.142345	0.656005	0.490498	0.460709	0.457739	-1.1274	down
GO:0060452	positive regulation of cardiac muscle contraction	biological_process	10	0.068791	MSTRG.1268	Ccn2	cellular communication network factor 2 [Source:RGD Symbol;Acc:621392]	97.162	163.002	90.2827	62.7941	47.5404	55.8168	2.1092	1.0767	up
GO:0032780	negative regulation of ATPase activity	biological_process	8	0.068791	MSTRG.1771	Tnni3	dynein, axonemal, assembly factor 3 [Source:RGD Symbol;Acc:2323487];troponin I3, cardiac type [Source:RGD Symbol;Acc:62052]	0.232226	0.361112	0.142345	0.656005	0.490498	0.460709	0.457739	-1.1274	down
GO:0051302	regulation of cell division	biological_process	6	0.068791	MSTRG.7866	Rack1	receptor for activated C kinase 1 [Source:RGD Symbol;Acc:69229]	2.12116	1.74372	0.700888	3.26988	5.21372	1.65053	0.450533	-1.15029	down
GO:0007021	tubulin complex assembly	biological_process	8	0.068791	MSTRG.27342	Cryab	crystallin, alpha B [Source:RGD Symbol;Acc:2414]	4.40167	3.16475	1.93664	6.6383	11.8965	6.47058	0.380041	-1.39577	down
GO:0071872	cellular response to epinephrine stimulus	biological_process	9	0.068791	MSTRG.7077	Adipoq	adiponectin, C1Q and collagen domain containing [Source:RGD Symbol;Acc:628748]	1.56388	0.891889	1.23395	0.20421	0.211193	0.290087	5.23001	2.38681	up
GO:0048660	regulation of smooth muscle cell proliferation	biological_process	7	0.068791	ENSRNOG00000005964	Nr4a3	nuclear receptor subfamily 4, group A, member 3 [Source:RGD Symbol;Acc:61882]	0.829097	0.535612	0.350647	0.270902	0.310903	0.258833	2.04054	1.02895	up
GO:0016918	retinal binding	molecular_function	7	0.068791	MSTRG.16024	Crabp2	cellular retinoic acid binding protein 2 [Source:RGD Symbol;Acc:62070]	2.61663	8.42398	7.11811	2.96094	3.12274	2.63796	2.08203	1.05799	up
GO:0009967	positive regulation of signal transduction	biological_process	8	0.068791	MSTRG.7077	Adipoq	adiponectin, C1Q and collagen domain containing [Source:RGD Symbol;Acc:628748]	1.56388	0.891889	1.23395	0.20421	0.211193	0.290087	5.23001	2.38681	up
GO:0035988	chondrocyte proliferation	biological_process	4	0.068791	MSTRG.1268	Ccn2	cellular communication network factor 2 [Source:RGD Symbol;Acc:621392]	97.162	163.002	90.2827	62.7941	47.5404	55.8168	2.1092	1.0767	up
GO:0044320	cellular response to leptin stimulus	biological_process	7	0.068791	ENSRNOG00000005964	Nr4a3	nuclear receptor subfamily 4, group A, member 3 [Source:RGD Symbol;Acc:61882]	0.829097	0.535612	0.350647	0.270902	0.310903	0.258833	2.04054	1.02895	up
GO:0019911	structural constituent of myelin sheath	molecular_function	4	0.068791	MSTRG.19016	Mal	mal, T-cell differentiation protein [Source:RGD Symbol;Acc:3037]	1.70514	1.76004	1.8063	0.88808	0.918323	0.823618	2.00435	1.00314	up
GO:0032355	response to estradiol	biological_process	6	0.0690931	MSTRG.1268	Ccn2	cellular communication network factor 2 [Source:RGD Symbol;Acc:621392]	97.162	163.002	90.2827	62.7941	47.5404	55.8168	2.1092	1.0767	up
GO:0032355	response to estradiol	biological_process	6	0.0690931	MSTRG.27342	Cryab	crystallin, alpha B [Source:RGD Symbol;Acc:2414]	4.40167	3.16475	1.93664	6.6383	11.8965	6.47058	0.380041	-1.39577	down
GO:0032355	response to estradiol	biological_process	6	0.0690931	MSTRG.29376	Igfbp2	insulin-like growth factor binding protein 2 [Source:RGD Symbol;Acc:2873]	0.073613	0.214964	0.510057	2.1311	1.26299	0.635682	0.198184	-2.33509	down
GO:0031072	heat shock protein binding	molecular_function	5	0.0738547	MSTRG.17011	Hspa1b	heat shock protein family A (Hsp70) member 1B [Source:RGD Symbol;Acc:2840]	5.24329	5.52474	2.7742	7.21687	11.7813	14.7747	0.40098	-1.3184	down
GO:0031072	heat shock protein binding	molecular_function	5	0.0738547	MSTRG.6522	LOC680121	similar to heat shock protein 8 [Source:RGD Symbol;Acc:1595502]	30.1405	38.296	22.6258	32.113	23.1973	149.677	0.444234	-1.17061	down
GO:0051901	positive regulation of mitochondrial depolarization	biological_process	8	0.0754061	MSTRG.7866	Rack1	receptor for activated C kinase 1 [Source:RGD Symbol;Acc:69229]	2.12116	1.74372	0.700888	3.26988	5.21372	1.65053	0.450533	-1.15029	down
GO:0070286	axonemal dynein complex assembly	biological_process	8	0.0754061	MSTRG.1771	Tnni3	dynein, axonemal, assembly factor 3 [Source:RGD Symbol;Acc:2323487];troponin I3, cardiac type [Source:RGD Symbol;Acc:62052]	0.232226	0.361112	0.142345	0.656005	0.490498	0.460709	0.457739	-1.1274	down
GO:0072711	cellular response to hydroxyurea	biological_process	7	0.0754061	MSTRG.23275	Ddi2	DNA damage inducible 1 homolog 2 [Source:RGD Symbol;Acc:1311815]	10.1342	3.79607	10.2228	3.09844	3.26578	3.1576	2.5366	1.34289	up
GO:0006734	NADH metabolic process	biological_process	4	0.0754061	MSTRG.26667	Gpd1	glycerol-3-phosphate dehydrogenase 1 [Source:RGD Symbol;Acc:621381]	2.5	0.764599	1.04927	0.560462	0.529418	0.458827	2.78547	1.47792	up
GO:0010739	positive regulation of protein kinase A signaling	biological_process	10	0.0754061	MSTRG.7077	Adipoq	adiponectin, C1Q and collagen domain containing [Source:RGD Symbol;Acc:628748]	1.56388	0.891889	1.23395	0.20421	0.211193	0.290087	5.23001	2.38681	up
GO:0046888	negative regulation of hormone secretion	biological_process	8	0.0754061	MSTRG.7077	Adipoq	adiponectin, C1Q and collagen domain containing [Source:RGD Symbol;Acc:628748]	1.56388	0.891889	1.23395	0.20421	0.211193	0.290087	5.23001	2.38681	up
GO:0032591	dendritic spine membrane	cellular_component	7	0.0754061	ENSRNOG00000045816	Gria1	glutamate ionotropic receptor AMPA type subunit 1 [Source:RGD Symbol;Acc:621531]	0.153662	0.0781212	0.0762892	0.328888	0.272742	0.303107	0.34051	-1.55423	down
GO:0071639	positive regulation of monocyte chemotactic protein-1 production	biological_process	9	0.0754061	MSTRG.7077	Adipoq	adiponectin, C1Q and collagen domain containing [Source:RGD Symbol;Acc:628748]	1.56388	0.891889	1.23395	0.20421	0.211193	0.290087	5.23001	2.38681	up
GO:0031994	insulin-like growth factor I binding	molecular_function	7	0.0754061	MSTRG.29376	Igfbp2	insulin-like growth factor binding protein 2 [Source:RGD Symbol;Acc:2873]	0.073613	0.214964	0.510057	2.1311	1.26299	0.635682	0.198184	-2.33509	down
GO:0035634	response to stilbenoid	biological_process	7	0.0754061	MSTRG.4039	Ifit3	interferon-induced protein with tetratricopeptide repeats 3 [Source:RGD Symbol;Acc:1359681]	4.97721	3.52241	3.21606	1.3741	1.53573	2.40418	2.20468	1.14057	up
GO:1901029	negative regulation of mitochondrial outer membrane permeabilization involved in apoptotic signaling pathway	biological_process	10	0.0754061	MSTRG.17011	Hspa1b	heat shock protein family A (Hsp70) member 1B [Source:RGD Symbol;Acc:2840]	5.24329	5.52474	2.7742	7.21687	11.7813	14.7747	0.40098	-1.3184	down
GO:0006940	regulation of smooth muscle contraction	biological_process	9	0.0754061	MSTRG.1771	Tnni3	dynein, axonemal, assembly factor 3 [Source:RGD Symbol;Acc:2323487];troponin I3, cardiac type [Source:RGD Symbol;Acc:62052]	0.232226	0.361112	0.142345	0.656005	0.490498	0.460709	0.457739	-1.1274	down
GO:0072091	regulation of stem cell proliferation	biological_process	7	0.0819745	MSTRG.1247	RGD1559962	similar to High mobility group protein 2 (HMG-2) [Source:RGD Symbol;Acc:1559962]	2.0089	1.58098	1.57628	1.87562	4.21377	5.19355	0.457874	-1.12698	down
GO:1900025	negative regulation of substrate adhesion-dependent cell spreading	biological_process	10	0.0819745	ENSRNOG00000001739	Meltf	melanotransferrin [Source:RGD Symbol;Acc:1308155]	0.547705	1.43145	0.847265	0.639556	0.295855	0.228587	2.4282	1.27989	up
GO:0045056	transcytosis	biological_process	7	0.0819745	MSTRG.26142	Gpihbp1	glycosylphosphatidylinositol anchored high density lipoprotein binding protein 1 [Source:RGD Symbol;Acc:1564237]	2.63219	2.08795	1.30847	0.676363	0.879262	1.01499	2.3452	1.22971	up
GO:0042267	natural killer cell mediated cytotoxicity	biological_process	5	0.0819745	MSTRG.21375	Klrk1	killer cell lectin like receptor K1 [Source:RGD Symbol;Acc:3180]	3.23628	1.16965	1.88792	0.905104	0.662451	1.16837	2.30045	1.20191	up
GO:0042805	actinin binding	molecular_function	6	0.0819745	MSTRG.2394	Csrp3	cysteine and glycine rich protein 3 [Source:RGD Symbol;Acc:71092]	0.636871	1.03978	0.697614	1.76671	2.35583	1.56165	0.417697	-1.25947	down
GO:0003796	lysozyme activity	molecular_function	7	0.0819745	MSTRG.25663	Lyc2	lysozyme C type 2 [Source:RGD Symbol;Acc:1593616]	41.8054	26.3828	18.9251	18.5648	14.441	7.07027	2.1737	1.12015	up
GO:0031953	negative regulation of protein autophosphorylation	biological_process	11	0.0819745	MSTRG.7077	Adipoq	adiponectin, C1Q and collagen domain containing [Source:RGD Symbol;Acc:628748]	1.56388	0.891889	1.23395	0.20421	0.211193	0.290087	5.23001	2.38681	up
GO:0032635	interleukin-6 production	biological_process	5	0.0819745	MSTRG.29050	Il18rap	interleukin 18 receptor accessory protein [Source:RGD Symbol;Acc:727867]	3.58786	2.45648	3.08283	1.61627	1.37962	1.35237	2.09904	1.06973	up
GO:0061635	regulation of protein complex stability	biological_process	5	0.0819745	MSTRG.14059	Scoc	short coiled-coil protein [Source:RGD Symbol;Acc:1311860]	10.7525	4.35	10.9578	3.38544	3.16803	3.38759	2.62148	1.39038	up
GO:0042119	neutrophil activation	biological_process	8	0.0819745	MSTRG.29050	Il18rap	interleukin 18 receptor accessory protein [Source:RGD Symbol;Acc:727867]	3.58786	2.45648	3.08283	1.61627	1.37962	1.35237	2.09904	1.06973	up
GO:0060119	inner ear receptor cell development	biological_process	7	0.0819745	ENSRNOG00000003972	Tshr	thyroid stimulating hormone receptor [Source:RGD Symbol;Acc:3911]	0.489374	0.184589	0.289544	0.094947	0.190353	0.167872	2.12614	1.08824	up
GO:0030674	protein-macromolecule adaptor activity	molecular_function	5	0.0821156	MSTRG.4999	Trim17	tripartite motif-containing 17 [Source:RGD Symbol;Acc:69290]	0.158453	0.186512	0.244611	0.471663	0.441507	0.741154	0.356386	-1.48849	down
GO:0030674	protein-macromolecule adaptor activity	molecular_function	5	0.0821156	MSTRG.9426	Jchain	joining chain of multimeric IgA and IgM [Source:RGD Symbol;Acc:1310155]	132.362	133.248	97.0823	41.2594	54.0119	70.3597	2.18976	1.13077	up
GO:0009617	response to bacterium	biological_process	7	0.0831577	MSTRG.13940	Mt2A	metallothionein 2A [Source:RGD Symbol;Acc:1592345]	29.572	46.2534	20.3646	9.09823	9.9753	10.0336	3.30469	1.72452	up
GO:0009617	response to bacterium	biological_process	7	0.0831577	MSTRG.4039	Ifit3	interferon-induced protein with tetratricopeptide repeats 3 [Source:RGD Symbol;Acc:1359681]	4.97721	3.52241	3.21606	1.3741	1.53573	2.40418	2.20468	1.14057	up
GO:0009617	response to bacterium	biological_process	7	0.0831577	MSTRG.7077	Adipoq	adiponectin, C1Q and collagen domain containing [Source:RGD Symbol;Acc:628748]	1.56388	0.891889	1.23395	0.20421	0.211193	0.290087	5.23001	2.38681	up
GO:0043434	response to peptide hormone	biological_process	6	0.086348	ENSRNOG00000005964	Nr4a3	nuclear receptor subfamily 4, group A, member 3 [Source:RGD Symbol;Acc:61882]	0.829097	0.535612	0.350647	0.270902	0.310903	0.258833	2.04054	1.02895	up
GO:0043434	response to peptide hormone	biological_process	6	0.086348	MSTRG.1268	Ccn2	cellular communication network factor 2 [Source:RGD Symbol;Acc:621392]	97.162	163.002	90.2827	62.7941	47.5404	55.8168	2.1092	1.0767	up
GO:0032436	positive regulation of proteasomal ubiquitin-dependent protein catabolic process	biological_process	12	0.0884886	MSTRG.17011	Hspa1b	heat shock protein family A (Hsp70) member 1B [Source:RGD Symbol;Acc:2840]	5.24329	5.52474	2.7742	7.21687	11.7813	14.7747	0.40098	-1.3184	down
GO:0032436	positive regulation of proteasomal ubiquitin-dependent protein catabolic process	biological_process	12	0.0884886	MSTRG.7866	Rack1	receptor for activated C kinase 1 [Source:RGD Symbol;Acc:69229]	2.12116	1.74372	0.700888	3.26988	5.21372	1.65053	0.450533	-1.15029	down
GO:0060548	negative regulation of cell death	biological_process	7	0.0884886	MSTRG.1268	Ccn2	cellular communication network factor 2 [Source:RGD Symbol;Acc:621392]	97.162	163.002	90.2827	62.7941	47.5404	55.8168	2.1092	1.0767	up
GO:0060548	negative regulation of cell death	biological_process	7	0.0884886	MSTRG.17011	Hspa1b	heat shock protein family A (Hsp70) member 1B [Source:RGD Symbol;Acc:2840]	5.24329	5.52474	2.7742	7.21687	11.7813	14.7747	0.40098	-1.3184	down
GO:0071333	cellular response to glucose stimulus	biological_process	10	0.0884886	MSTRG.10688	Cma1	chymase 1 [Source:RGD Symbol;Acc:2365]	4.6429	2.56201	3.59294	1.91197	1.46093	1.90488	2.04591	1.03274	up
GO:0071333	cellular response to glucose stimulus	biological_process	10	0.0884886	MSTRG.7866	Rack1	receptor for activated C kinase 1 [Source:RGD Symbol;Acc:69229]	2.12116	1.74372	0.700888	3.26988	5.21372	1.65053	0.450533	-1.15029	down
GO:0030101	natural killer cell activation	biological_process	7	0.0884966	MSTRG.21375	Klrk1	killer cell lectin like receptor K1 [Source:RGD Symbol;Acc:3180]	3.23628	1.16965	1.88792	0.905104	0.662451	1.16837	2.30045	1.20191	up
GO:0030048	actin filament-based movement	biological_process	5	0.0884966	MSTRG.10649	Myh6	myosin heavy chain 7 [Source:RGD Symbol;Acc:62030];myosin heavy chain 6 [Source:RGD Symbol;Acc:62029]	0.997238	1.06135	0.328905	1.69535	2.31046	1.00868	0.476118	-1.07061	down
GO:0008210	estrogen metabolic process	biological_process	7	0.0884966	ENSRNOG00000019500	Cyp1a1	cytochrome P450, family 1, subfamily a, polypeptide 1 [Source:RGD Symbol;Acc:2458]	0.03592	0.0001	0.081544	0.280251	0.378238	0.727885	0.0847996	-3.5598	down
GO:0043303	mast cell degranulation	biological_process	9	0.0884966	ENSRNOG00000005964	Nr4a3	nuclear receptor subfamily 4, group A, member 3 [Source:RGD Symbol;Acc:61882]	0.829097	0.535612	0.350647	0.270902	0.310903	0.258833	2.04054	1.02895	up
GO:0046486	glycerolipid metabolic process	biological_process	7	0.0884966	MSTRG.26667	Gpd1	glycerol-3-phosphate dehydrogenase 1 [Source:RGD Symbol;Acc:621381]	2.5	0.764599	1.04927	0.560462	0.529418	0.458827	2.78547	1.47792	up
GO:0019835	cytolysis	biological_process	4	0.0884966	MSTRG.25663	Lyc2	lysozyme C type 2 [Source:RGD Symbol;Acc:1593616]	41.8054	26.3828	18.9251	18.5648	14.441	7.07027	2.1737	1.12015	up
GO:0044212	transcription regulatory region DNA binding	molecular_function	7	0.0884966	MSTRG.3425	Irf7	interferon regulatory factor 7 [Source:RGD Symbol;Acc:1307828]	3.76225	5.28163	2.92289	1.06032	1.17443	1.60451	3.11694	1.64013	up
GO:0002199	zona pellucida receptor complex	cellular_component	4	0.0884966	MSTRG.17011	Hspa1b	heat shock protein family A (Hsp70) member 1B [Source:RGD Symbol;Acc:2840]	5.24329	5.52474	2.7742	7.21687	11.7813	14.7747	0.40098	-1.3184	down
GO:0046685	response to arsenic-containing substance	biological_process	5	0.0884966	ENSRNOG00000019500	Cyp1a1	cytochrome P450, family 1, subfamily a, polypeptide 1 [Source:RGD Symbol;Acc:2458]	0.03592	0.0001	0.081544	0.280251	0.378238	0.727885	0.0847996	-3.5598	down
GO:0043248	proteasome assembly	biological_process	8	0.0884966	MSTRG.7427	LOC100911238	proteasome maturation protein-like [Source:RGD Symbol;Acc:6494524]	1.59028	3.85381	0.293878	9.47432	3.8247	8.55791	0.262524	-1.92948	down
GO:0033691	sialic acid binding	molecular_function	7	0.0884966	MSTRG.7077	Adipoq	adiponectin, C1Q and collagen domain containing [Source:RGD Symbol;Acc:628748]	1.56388	0.891889	1.23395	0.20421	0.211193	0.290087	5.23001	2.38681	up
GO:1902043	positive regulation of extrinsic apoptotic signaling pathway via death domain receptors	biological_process	11	0.0884966	MSTRG.19016	Mal	mal, T-cell differentiation protein [Source:RGD Symbol;Acc:3037]	1.70514	1.76004	1.8063	0.88808	0.918323	0.823618	2.00435	1.00314	up
GO:0051403	stress-activated MAPK cascade	biological_process	12	0.0884966	MSTRG.27342	Cryab	crystallin, alpha B [Source:RGD Symbol;Acc:2414]	4.40167	3.16475	1.93664	6.6383	11.8965	6.47058	0.380041	-1.39577	down
GO:0060340	positive regulation of type I interferon-mediated signaling pathway	biological_process	10	0.0884966	MSTRG.3425	Irf7	interferon regulatory factor 7 [Source:RGD Symbol;Acc:1307828]	3.76225	5.28163	2.92289	1.06032	1.17443	1.60451	3.11694	1.64013	up
GO:0008328	ionotropic glutamate receptor complex	cellular_component	7	0.0884966	ENSRNOG00000045816	Gria1	glutamate ionotropic receptor AMPA type subunit 1 [Source:RGD Symbol;Acc:621531]	0.153662	0.0781212	0.0762892	0.328888	0.272742	0.303107	0.34051	-1.55423	down
GO:0070365	hepatocyte differentiation	biological_process	7	0.0884966	ENSRNOG00000019500	Cyp1a1	cytochrome P450, family 1, subfamily a, polypeptide 1 [Source:RGD Symbol;Acc:2458]	0.03592	0.0001	0.081544	0.280251	0.378238	0.727885	0.0847996	-3.5598	down
GO:0003300	cardiac muscle hypertrophy	biological_process	8	0.0884966	MSTRG.2394	Csrp3	cysteine and glycine rich protein 3 [Source:RGD Symbol;Acc:71092]	0.636871	1.03978	0.697614	1.76671	2.35583	1.56165	0.417697	-1.25947	down
GO:0045333	cellular respiration	biological_process	7	0.0884966	ENSRNOG00000005964	Nr4a3	nuclear receptor subfamily 4, group A, member 3 [Source:RGD Symbol;Acc:61882]	0.829097	0.535612	0.350647	0.270902	0.310903	0.258833	2.04054	1.02895	up
GO:0032880	regulation of protein localization	biological_process	6	0.0906449	MSTRG.4999	Trim17	tripartite motif-containing 17 [Source:RGD Symbol;Acc:69290]	0.158453	0.186512	0.244611	0.471663	0.441507	0.741154	0.356386	-1.48849	down
GO:0032880	regulation of protein localization	biological_process	6	0.0906449	MSTRG.7866	Rack1	receptor for activated C kinase 1 [Source:RGD Symbol;Acc:69229]	2.12116	1.74372	0.700888	3.26988	5.21372	1.65053	0.450533	-1.15029	down
GO:0004198	calcium-dependent cysteine-type endopeptidase activity	molecular_function	9	0.0949726	ENSRNOG00000018480	Capn9	calpain 9 [Source:RGD Symbol;Acc:70965]	0.16122	0.105673	0.226045	0.394335	0.248195	0.41808	0.464768	-1.10542	down
GO:0047498	calcium-dependent phospholipase A2 activity	molecular_function	9	0.0949726	ENSRNOG00000026764	Pla2g4c	phospholipase A2 group IVC [Source:RGD Symbol;Acc:1594658]	0.486308	0.281544	0.148092	0.0390525	0.0591423	0.217515	2.90122	1.53666	up
GO:0007512	adult heart development	biological_process	7	0.0949726	MSTRG.10649	Myh6	myosin heavy chain 7 [Source:RGD Symbol;Acc:62030];myosin heavy chain 6 [Source:RGD Symbol;Acc:62029]	0.997238	1.06135	0.328905	1.69535	2.31046	1.00868	0.476118	-1.07061	down
GO:0035457	cellular response to interferon-alpha	biological_process	8	0.0949726	MSTRG.4039	Ifit3	interferon-induced protein with tetratricopeptide repeats 3 [Source:RGD Symbol;Acc:1359681]	4.97721	3.52241	3.21606	1.3741	1.53573	2.40418	2.20468	1.14057	up
GO:0035497	cAMP response element binding	molecular_function	11	0.0949726	ENSRNOG00000005964	Nr4a3	nuclear receptor subfamily 4, group A, member 3 [Source:RGD Symbol;Acc:61882]	0.829097	0.535612	0.350647	0.270902	0.310903	0.258833	2.04054	1.02895	up
GO:0010804	negative regulation of tumor necrosis factor-mediated signaling pathway	biological_process	10	0.0949726	MSTRG.7077	Adipoq	adiponectin, C1Q and collagen domain containing [Source:RGD Symbol;Acc:628748]	1.56388	0.891889	1.23395	0.20421	0.211193	0.290087	5.23001	2.38681	up
GO:0031005	filamin binding	molecular_function	6	0.0949726	MSTRG.23260	Hspb7	heat shock protein family B (small) member 7 [Source:RGD Symbol;Acc:62021]	2.46517	1.00351	0.914151	2.58052	4.33748	2.0995	0.486036	-1.04086	down
GO:0003094	glomerular filtration	biological_process	7	0.0949726	MSTRG.9426	Jchain	joining chain of multimeric IgA and IgM [Source:RGD Symbol;Acc:1310155]	132.362	133.248	97.0823	41.2594	54.0119	70.3597	2.18976	1.13077	up
GO:0071548	response to dexamethasone	biological_process	6	0.0949726	ENSRNOG00000001926	Cldn1	claudin 1 [Source:RGD Symbol;Acc:68422]	0.488957	0.588734	0.237891	0.155539	0.268818	0.188699	2.14594	1.10161	up
GO:0045471	response to ethanol	biological_process	6	0.0955023	ENSRNOG00000001926	Cldn1	claudin 1 [Source:RGD Symbol;Acc:68422]	0.488957	0.588734	0.237891	0.155539	0.268818	0.188699	2.14594	1.10161	up
GO:0045471	response to ethanol	biological_process	6	0.0955023	MSTRG.17011	Hspa1b	heat shock protein family A (Hsp70) member 1B [Source:RGD Symbol;Acc:2840]	5.24329	5.52474	2.7742	7.21687	11.7813	14.7747	0.40098	-1.3184	down
GO:0045471	response to ethanol	biological_process	6	0.0955023	MSTRG.7077	Adipoq	adiponectin, C1Q and collagen domain containing [Source:RGD Symbol;Acc:628748]	1.56388	0.891889	1.23395	0.20421	0.211193	0.290087	5.23001	2.38681	up
GO:0005840	ribosome	cellular_component	6	0.0988148	MSTRG.11358	LOC690468	similar to 60S ribosomal protein L38 [Source:RGD Symbol;Acc:1596041]	8.73527	23.9417	6.2189	7.9823	2.56257	2.99969	2.8717	1.5219	up
GO:0005840	ribosome	cellular_component	6	0.0988148	MSTRG.16301	LOC685963	similar to 60S ribosomal protein L38 [Source:RGD Symbol;Acc:1587812]	9.62033	24.8426	7.96908	8.04825	3.22774	4.20371	2.74114	1.45478	up
GO:0005840	ribosome	cellular_component	6	0.0988148	MSTRG.23291	LOC100362149	ribosomal protein S20-like [Source:RGD Symbol;Acc:2318734]	5.17524	3.97197	5.25486	4.70844	14.5374	10.2089	0.488957	-1.03222	down
GO:0005840	ribosome	cellular_component	6	0.0988148	MSTRG.28226	AABR07071482		0.81612	0.929613	0.839154	2.29921	1.63257	2.67258	0.391391	-1.35332	down
GO:0005840	ribosome	cellular_component	6	0.0988148	MSTRG.28488	LOC100362684	ribosomal protein S20-like [Source:RGD Symbol;Acc:2324274]	4.34034	18.8852	4.45946	4.11471	2.30514	4.54696	2.52444	1.33596	up
GO:0005840	ribosome	cellular_component	6	0.0988148	MSTRG.7866	Rack1	receptor for activated C kinase 1 [Source:RGD Symbol;Acc:69229]	2.12116	1.74372	0.700888	3.26988	5.21372	1.65053	0.450533	-1.15029	down
GO:0005840	ribosome	cellular_component	6	0.0988148	MSTRG.9720	LOC100361259	60S ribosomal protein L13-like [Source:RGD Symbol;Acc:2320504]	0.491681	2.86215	2.46051	0.440434	0.334145	0.708102	3.92151	1.97141	up
GO:0043154	negative regulation of cysteine-type endopeptidase activity involved in apoptotic process	biological_process	10	0.0994213	MSTRG.17011	Hspa1b	heat shock protein family A (Hsp70) member 1B [Source:RGD Symbol;Acc:2840]	5.24329	5.52474	2.7742	7.21687	11.7813	14.7747	0.40098	-1.3184	down
GO:0043154	negative regulation of cysteine-type endopeptidase activity involved in apoptotic process	biological_process	10	0.0994213	MSTRG.27342	Cryab	crystallin, alpha B [Source:RGD Symbol;Acc:2414]	4.40167	3.16475	1.93664	6.6383	11.8965	6.47058	0.380041	-1.39577	down
GO:0032270	positive regulation of cellular protein metabolic process	biological_process	8	0.101403	MSTRG.7077	Adipoq	adiponectin, C1Q and collagen domain containing [Source:RGD Symbol;Acc:628748]	1.56388	0.891889	1.23395	0.20421	0.211193	0.290087	5.23001	2.38681	up
GO:0008307	structural constituent of muscle	molecular_function	4	0.101403	MSTRG.2394	Csrp3	cysteine and glycine rich protein 3 [Source:RGD Symbol;Acc:71092]	0.636871	1.03978	0.697614	1.76671	2.35583	1.56165	0.417697	-1.25947	down
GO:0001972	retinoic acid binding	molecular_function	7	0.101403	MSTRG.16024	Crabp2	cellular retinoic acid binding protein 2 [Source:RGD Symbol;Acc:62070]	2.61663	8.42398	7.11811	2.96094	3.12274	2.63796	2.08203	1.05799	up
GO:0030239	myofibril assembly	biological_process	7	0.101403	MSTRG.10649	Myh6	myosin heavy chain 7 [Source:RGD Symbol;Acc:62030];myosin heavy chain 6 [Source:RGD Symbol;Acc:62029]	0.997238	1.06135	0.328905	1.69535	2.31046	1.00868	0.476118	-1.07061	down
GO:0070885	negative regulation of calcineurin-NFAT signaling cascade	biological_process	12	0.101403	ENSRNOG00000014815	Myoz2	myozenin 2 [Source:RGD Symbol;Acc:1307669]	0.089599	0.566478	0.085301	1.18754	1.33308	0.76693	0.225511	-2.14873	down
GO:0043968	histone H2A acetylation	biological_process	11	0.101403	MSTRG.752	Morf4l2	mortality factor 4 like 2 [Source:RGD Symbol;Acc:1359471]	68.6344	76.9306	75.8236	18.1591	17.1081	17.1627	4.22256	2.07812	up
GO:0001759	organ induction	biological_process	9	0.101403	MSTRG.25662	Frs2	fibroblast growth factor receptor substrate 2 [Source:RGD Symbol;Acc:1308201]	1.85463	2.23289	2.7624	1.887	8.46212	8.22208	0.368846	-1.43891	down
GO:0070528	protein kinase C signaling	biological_process	6	0.101403	MSTRG.2394	Csrp3	cysteine and glycine rich protein 3 [Source:RGD Symbol;Acc:71092]	0.636871	1.03978	0.697614	1.76671	2.35583	1.56165	0.417697	-1.25947	down
GO:0022617	extracellular matrix disassembly	biological_process	6	0.101403	MSTRG.10688	Cma1	chymase 1 [Source:RGD Symbol;Acc:2365]	4.6429	2.56201	3.59294	1.91197	1.46093	1.90488	2.04591	1.03274	up
GO:0035259	glucocorticoid receptor binding	molecular_function	9	0.101403	ENSRNOG00000005964	Nr4a3	nuclear receptor subfamily 4, group A, member 3 [Source:RGD Symbol;Acc:61882]	0.829097	0.535612	0.350647	0.270902	0.310903	0.258833	2.04054	1.02895	up
GO:0042573	retinoic acid metabolic process	biological_process	11	0.101403	MSTRG.16024	Crabp2	cellular retinoic acid binding protein 2 [Source:RGD Symbol;Acc:62070]	2.61663	8.42398	7.11811	2.96094	3.12274	2.63796	2.08203	1.05799	up
GO:0061099	negative regulation of protein tyrosine kinase activity	biological_process	12	0.101403	MSTRG.7866	Rack1	receptor for activated C kinase 1 [Source:RGD Symbol;Acc:69229]	2.12116	1.74372	0.700888	3.26988	5.21372	1.65053	0.450533	-1.15029	down
GO:0009749	response to glucose	biological_process	9	0.103896	MSTRG.1268	Ccn2	cellular communication network factor 2 [Source:RGD Symbol;Acc:621392]	97.162	163.002	90.2827	62.7941	47.5404	55.8168	2.1092	1.0767	up
GO:0009749	response to glucose	biological_process	9	0.103896	MSTRG.7077	Adipoq	adiponectin, C1Q and collagen domain containing [Source:RGD Symbol;Acc:628748]	1.56388	0.891889	1.23395	0.20421	0.211193	0.290087	5.23001	2.38681	up
GO:0043010	camera-type eye development	biological_process	8	0.103896	ENSRNOG00000019500	Cyp1a1	cytochrome P450, family 1, subfamily a, polypeptide 1 [Source:RGD Symbol;Acc:2458]	0.03592	0.0001	0.081544	0.280251	0.378238	0.727885	0.0847996	-3.5598	down
GO:0043010	camera-type eye development	biological_process	8	0.103896	MSTRG.27342	Cryab	crystallin, alpha B [Source:RGD Symbol;Acc:2414]	4.40167	3.16475	1.93664	6.6383	11.8965	6.47058	0.380041	-1.39577	down
GO:0009615	response to virus	biological_process	7	0.106153	ENSRNOG00000019500	Cyp1a1	cytochrome P450, family 1, subfamily a, polypeptide 1 [Source:RGD Symbol;Acc:2458]	0.03592	0.0001	0.081544	0.280251	0.378238	0.727885	0.0847996	-3.5598	down
GO:0009615	response to virus	biological_process	7	0.106153	MSTRG.4039	Ifit3	interferon-induced protein with tetratricopeptide repeats 3 [Source:RGD Symbol;Acc:1359681]	4.97721	3.52241	3.21606	1.3741	1.53573	2.40418	2.20468	1.14057	up
GO:0008144	drug binding	molecular_function	4	0.106153	MSTRG.1247	RGD1559962	similar to High mobility group protein 2 (HMG-2) [Source:RGD Symbol;Acc:1559962]	2.0089	1.58098	1.57628	1.87562	4.21377	5.19355	0.457874	-1.12698	down
GO:0008144	drug binding	molecular_function	4	0.106153	MSTRG.13940	Mt2A	metallothionein 2A [Source:RGD Symbol;Acc:1592345]	29.572	46.2534	20.3646	9.09823	9.9753	10.0336	3.30469	1.72452	up
GO:0031362	anchored component of external side of plasma membrane	cellular_component	7	0.107788	MSTRG.26142	Gpihbp1	glycosylphosphatidylinositol anchored high density lipoprotein binding protein 1 [Source:RGD Symbol;Acc:1564237]	2.63219	2.08795	1.30847	0.676363	0.879262	1.01499	2.3452	1.22971	up
GO:0045721	negative regulation of gluconeogenesis	biological_process	11	0.107788	MSTRG.7077	Adipoq	adiponectin, C1Q and collagen domain containing [Source:RGD Symbol;Acc:628748]	1.56388	0.891889	1.23395	0.20421	0.211193	0.290087	5.23001	2.38681	up
GO:0060337	type I interferon signaling pathway	biological_process	7	0.107788	MSTRG.3425	Irf7	interferon regulatory factor 7 [Source:RGD Symbol;Acc:1307828]	3.76225	5.28163	2.92289	1.06032	1.17443	1.60451	3.11694	1.64013	up
GO:0050678	regulation of epithelial cell proliferation	biological_process	7	0.107788	MSTRG.25662	Frs2	fibroblast growth factor receptor substrate 2 [Source:RGD Symbol;Acc:1308201]	1.85463	2.23289	2.7624	1.887	8.46212	8.22208	0.368846	-1.43891	down
GO:0098632	cell-cell adhesion mediator activity	molecular_function	5	0.107788	ENSRNOG00000008054	Igsf9	immunoglobulin superfamily, member 9 [Source:RGD Symbol;Acc:1304566]	0.292083	0.261639	0.287037	0.673067	0.658462	0.633483	0.427864	-1.22477	down
GO:1901673	regulation of mitotic spindle assembly	biological_process	9	0.107788	MSTRG.17011	Hspa1b	heat shock protein family A (Hsp70) member 1B [Source:RGD Symbol;Acc:2840]	5.24329	5.52474	2.7742	7.21687	11.7813	14.7747	0.40098	-1.3184	down
GO:0019395	fatty acid oxidation	biological_process	10	0.107788	MSTRG.7077	Adipoq	adiponectin, C1Q and collagen domain containing [Source:RGD Symbol;Acc:628748]	1.56388	0.891889	1.23395	0.20421	0.211193	0.290087	5.23001	2.38681	up
GO:0014898	cardiac muscle hypertrophy in response to stress	biological_process	6	0.107788	MSTRG.10649	Myh6	myosin heavy chain 7 [Source:RGD Symbol;Acc:62030];myosin heavy chain 6 [Source:RGD Symbol;Acc:62029]	0.997238	1.06135	0.328905	1.69535	2.31046	1.00868	0.476118	-1.07061	down
GO:0005523	tropomyosin binding	molecular_function	6	0.107788	MSTRG.1772	Tnnt1	troponin T1, slow skeletal type [Source:RGD Symbol;Acc:621852]	0.431625	0.589243	0.648615	2.42819	2.30412	1.00538	0.290968	-1.78107	down
GO:0051259	protein complex oligomerization	biological_process	7	0.107788	ENSRNOG00000001926	Cldn1	claudin 1 [Source:RGD Symbol;Acc:68422]	0.488957	0.588734	0.237891	0.155539	0.268818	0.188699	2.14594	1.10161	up
GO:0036477	somatodendritic compartment	cellular_component	5	0.107788	ENSRNOG00000045816	Gria1	glutamate ionotropic receptor AMPA type subunit 1 [Source:RGD Symbol;Acc:621531]	0.153662	0.0781212	0.0762892	0.328888	0.272742	0.303107	0.34051	-1.55423	down
GO:0009395	phospholipid catabolic process	biological_process	8	0.107788	ENSRNOG00000026764	Pla2g4c	phospholipase A2 group IVC [Source:RGD Symbol;Acc:1594658]	0.486308	0.281544	0.148092	0.0390525	0.0591423	0.217515	2.90122	1.53666	up
GO:0001916	positive regulation of T cell mediated cytotoxicity	biological_process	8	0.107788	MSTRG.17011	Hspa1b	heat shock protein family A (Hsp70) member 1B [Source:RGD Symbol;Acc:2840]	5.24329	5.52474	2.7742	7.21687	11.7813	14.7747	0.40098	-1.3184	down
GO:2000279	negative regulation of DNA biosynthetic process	biological_process	9	0.107788	MSTRG.7077	Adipoq	adiponectin, C1Q and collagen domain containing [Source:RGD Symbol;Acc:628748]	1.56388	0.891889	1.23395	0.20421	0.211193	0.290087	5.23001	2.38681	up
GO:0005779	integral component of peroxisomal membrane	cellular_component	7	0.107788	MSTRG.21596	Far2	fatty acyl CoA reductase 2 [Source:RGD Symbol;Acc:1565966]	4.70552	2.47182	3.21356	1.81247	1.36236	1.33524	2.30393	1.2041	up
GO:1903204	negative regulation of oxidative stress-induced neuron death	biological_process	9	0.107788	ENSRNOG00000005964	Nr4a3	nuclear receptor subfamily 4, group A, member 3 [Source:RGD Symbol;Acc:61882]	0.829097	0.535612	0.350647	0.270902	0.310903	0.258833	2.04054	1.02895	up
GO:0017144	drug metabolic process	biological_process	5	0.107788	ENSRNOG00000019500	Cyp1a1	cytochrome P450, family 1, subfamily a, polypeptide 1 [Source:RGD Symbol;Acc:2458]	0.03592	0.0001	0.081544	0.280251	0.378238	0.727885	0.0847996	-3.5598	down
GO:0048143	astrocyte activation	biological_process	6	0.107788	MSTRG.13940	Mt2A	metallothionein 2A [Source:RGD Symbol;Acc:1592345]	29.572	46.2534	20.3646	9.09823	9.9753	10.0336	3.30469	1.72452	up
GO:0009612	response to mechanical stimulus	biological_process	5	0.110708	MSTRG.17011	Hspa1b	heat shock protein family A (Hsp70) member 1B [Source:RGD Symbol;Acc:2840]	5.24329	5.52474	2.7742	7.21687	11.7813	14.7747	0.40098	-1.3184	down
GO:0009612	response to mechanical stimulus	biological_process	5	0.110708	MSTRG.29376	Igfbp2	insulin-like growth factor binding protein 2 [Source:RGD Symbol;Acc:2873]	0.073613	0.214964	0.510057	2.1311	1.26299	0.635682	0.198184	-2.33509	down
GO:0000987	cis-regulatory region sequence-specific DNA binding	molecular_function	9	0.110708	MSTRG.1247	RGD1559962	similar to High mobility group protein 2 (HMG-2) [Source:RGD Symbol;Acc:1559962]	2.0089	1.58098	1.57628	1.87562	4.21377	5.19355	0.457874	-1.12698	down
GO:0000987	cis-regulatory region sequence-specific DNA binding	molecular_function	9	0.110708	MSTRG.3425	Irf7	interferon regulatory factor 7 [Source:RGD Symbol;Acc:1307828]	3.76225	5.28163	2.92289	1.06032	1.17443	1.60451	3.11694	1.64013	up
GO:0014069	postsynaptic density	cellular_component	5	0.1108	ENSRNOG00000045816	Gria1	glutamate ionotropic receptor AMPA type subunit 1 [Source:RGD Symbol;Acc:621531]	0.153662	0.0781212	0.0762892	0.328888	0.272742	0.303107	0.34051	-1.55423	down
GO:0014069	postsynaptic density	cellular_component	5	0.1108	MSTRG.11358	LOC690468	similar to 60S ribosomal protein L38 [Source:RGD Symbol;Acc:1596041]	8.73527	23.9417	6.2189	7.9823	2.56257	2.99969	2.8717	1.5219	up
GO:0014069	postsynaptic density	cellular_component	5	0.1108	MSTRG.16301	LOC685963	similar to 60S ribosomal protein L38 [Source:RGD Symbol;Acc:1587812]	9.62033	24.8426	7.96908	8.04825	3.22774	4.20371	2.74114	1.45478	up
GO:0014069	postsynaptic density	cellular_component	5	0.1108	MSTRG.27342	Cryab	crystallin, alpha B [Source:RGD Symbol;Acc:2414]	4.40167	3.16475	1.93664	6.6383	11.8965	6.47058	0.380041	-1.39577	down
GO:1904754	positive regulation of vascular associated smooth muscle cell migration	biological_process	10	0.114128	ENSRNOG00000005964	Nr4a3	nuclear receptor subfamily 4, group A, member 3 [Source:RGD Symbol;Acc:61882]	0.829097	0.535612	0.350647	0.270902	0.310903	0.258833	2.04054	1.02895	up
GO:0060292	long-term synaptic depression	biological_process	10	0.114128	ENSRNOG00000045816	Gria1	glutamate ionotropic receptor AMPA type subunit 1 [Source:RGD Symbol;Acc:621531]	0.153662	0.0781212	0.0762892	0.328888	0.272742	0.303107	0.34051	-1.55423	down
GO:0071294	cellular response to zinc ion	biological_process	8	0.114128	MSTRG.13940	Mt2A	metallothionein 2A [Source:RGD Symbol;Acc:1592345]	29.572	46.2534	20.3646	9.09823	9.9753	10.0336	3.30469	1.72452	up
GO:2000114	regulation of establishment of cell polarity	biological_process	7	0.114128	MSTRG.7866	Rack1	receptor for activated C kinase 1 [Source:RGD Symbol;Acc:69229]	2.12116	1.74372	0.700888	3.26988	5.21372	1.65053	0.450533	-1.15029	down
GO:0045821	positive regulation of glycolytic process	biological_process	11	0.114128	MSTRG.26667	Gpd1	glycerol-3-phosphate dehydrogenase 1 [Source:RGD Symbol;Acc:621381]	2.5	0.764599	1.04927	0.560462	0.529418	0.458827	2.78547	1.47792	up
GO:1904706	negative regulation of vascular smooth muscle cell proliferation	biological_process	9	0.114128	MSTRG.7077	Adipoq	adiponectin, C1Q and collagen domain containing [Source:RGD Symbol;Acc:628748]	1.56388	0.891889	1.23395	0.20421	0.211193	0.290087	5.23001	2.38681	up
GO:0060077	inhibitory synapse	cellular_component	4	0.114128	ENSRNOG00000008054	Igsf9	immunoglobulin superfamily, member 9 [Source:RGD Symbol;Acc:1304566]	0.292083	0.261639	0.287037	0.673067	0.658462	0.633483	0.427864	-1.22477	down
GO:0070160	tight junction	cellular_component	5	0.114128	ENSRNOG00000001926	Cldn1	claudin 1 [Source:RGD Symbol;Acc:68422]	0.488957	0.588734	0.237891	0.155539	0.268818	0.188699	2.14594	1.10161	up
GO:0007041	lysosomal transport	biological_process	7	0.114128	MSTRG.17011	Hspa1b	heat shock protein family A (Hsp70) member 1B [Source:RGD Symbol;Acc:2840]	5.24329	5.52474	2.7742	7.21687	11.7813	14.7747	0.40098	-1.3184	down
GO:0010875	positive regulation of cholesterol efflux	biological_process	11	0.114128	MSTRG.7077	Adipoq	adiponectin, C1Q and collagen domain containing [Source:RGD Symbol;Acc:628748]	1.56388	0.891889	1.23395	0.20421	0.211193	0.290087	5.23001	2.38681	up
GO:0031674	I band	cellular_component	5	0.114128	MSTRG.27342	Cryab	crystallin, alpha B [Source:RGD Symbol;Acc:2414]	4.40167	3.16475	1.93664	6.6383	11.8965	6.47058	0.380041	-1.39577	down
GO:0099523	presynaptic cytosol	cellular_component	4	0.114128	MSTRG.6522	LOC680121	similar to heat shock protein 8 [Source:RGD Symbol;Acc:1595502]	30.1405	38.296	22.6258	32.113	23.1973	149.677	0.444234	-1.17061	down
GO:0050821	protein stabilization	biological_process	6	0.117608	MSTRG.17011	Hspa1b	heat shock protein family A (Hsp70) member 1B [Source:RGD Symbol;Acc:2840]	5.24329	5.52474	2.7742	7.21687	11.7813	14.7747	0.40098	-1.3184	down
GO:0050821	protein stabilization	biological_process	6	0.117608	MSTRG.26142	Gpihbp1	glycosylphosphatidylinositol anchored high density lipoprotein binding protein 1 [Source:RGD Symbol;Acc:1564237]	2.63219	2.08795	1.30847	0.676363	0.879262	1.01499	2.3452	1.22971	up
GO:0050821	protein stabilization	biological_process	6	0.117608	MSTRG.27342	Cryab	crystallin, alpha B [Source:RGD Symbol;Acc:2414]	4.40167	3.16475	1.93664	6.6383	11.8965	6.47058	0.380041	-1.39577	down
GO:0010629	negative regulation of gene expression	biological_process	8	0.11784	MSTRG.1247	RGD1559962	similar to High mobility group protein 2 (HMG-2) [Source:RGD Symbol;Acc:1559962]	2.0089	1.58098	1.57628	1.87562	4.21377	5.19355	0.457874	-1.12698	down
GO:0010629	negative regulation of gene expression	biological_process	8	0.11784	MSTRG.1268	Ccn2	cellular communication network factor 2 [Source:RGD Symbol;Acc:621392]	97.162	163.002	90.2827	62.7941	47.5404	55.8168	2.1092	1.0767	up
GO:0010629	negative regulation of gene expression	biological_process	8	0.11784	MSTRG.27342	Cryab	crystallin, alpha B [Source:RGD Symbol;Acc:2414]	4.40167	3.16475	1.93664	6.6383	11.8965	6.47058	0.380041	-1.39577	down
GO:0010629	negative regulation of gene expression	biological_process	8	0.11784	MSTRG.7866	Rack1	receptor for activated C kinase 1 [Source:RGD Symbol;Acc:69229]	2.12116	1.74372	0.700888	3.26988	5.21372	1.65053	0.450533	-1.15029	down
GO:0051384	response to glucocorticoid	biological_process	8	0.119968	MSTRG.29376	Igfbp2	insulin-like growth factor binding protein 2 [Source:RGD Symbol;Acc:2873]	0.073613	0.214964	0.510057	2.1311	1.26299	0.635682	0.198184	-2.33509	down
GO:0051384	response to glucocorticoid	biological_process	8	0.119968	MSTRG.7077	Adipoq	adiponectin, C1Q and collagen domain containing [Source:RGD Symbol;Acc:628748]	1.56388	0.891889	1.23395	0.20421	0.211193	0.290087	5.23001	2.38681	up
GO:0007584	response to nutrient	biological_process	7	0.119968	MSTRG.29376	Igfbp2	insulin-like growth factor binding protein 2 [Source:RGD Symbol;Acc:2873]	0.073613	0.214964	0.510057	2.1311	1.26299	0.635682	0.198184	-2.33509	down
GO:0007584	response to nutrient	biological_process	7	0.119968	MSTRG.7077	Adipoq	adiponectin, C1Q and collagen domain containing [Source:RGD Symbol;Acc:628748]	1.56388	0.891889	1.23395	0.20421	0.211193	0.290087	5.23001	2.38681	up
GO:0030898	actin-dependent ATPase activity	molecular_function	11	0.120423	MSTRG.10649	Myh6	myosin heavy chain 7 [Source:RGD Symbol;Acc:62030];myosin heavy chain 6 [Source:RGD Symbol;Acc:62029]	0.997238	1.06135	0.328905	1.69535	2.31046	1.00868	0.476118	-1.07061	down
GO:0004970	ionotropic glutamate receptor activity	molecular_function	7	0.120423	ENSRNOG00000045816	Gria1	glutamate ionotropic receptor AMPA type subunit 1 [Source:RGD Symbol;Acc:621531]	0.153662	0.0781212	0.0762892	0.328888	0.272742	0.303107	0.34051	-1.55423	down
GO:0033120	positive regulation of RNA splicing	biological_process	9	0.120423	MSTRG.17011	Hspa1b	heat shock protein family A (Hsp70) member 1B [Source:RGD Symbol;Acc:2840]	5.24329	5.52474	2.7742	7.21687	11.7813	14.7747	0.40098	-1.3184	down
GO:0010259	multicellular organism aging	biological_process	5	0.120423	MSTRG.27342	Cryab	crystallin, alpha B [Source:RGD Symbol;Acc:2414]	4.40167	3.16475	1.93664	6.6383	11.8965	6.47058	0.380041	-1.39577	down
GO:0006880	intracellular sequestering of iron ion	biological_process	5	0.120423	MSTRG.2963	AABR07005031		1.23131	1.57767	0.841578	3.18902	3.75164	4.00715	0.333451	-1.58445	down
GO:0060047	heart contraction	biological_process	7	0.120423	MSTRG.1771	Tnni3	dynein, axonemal, assembly factor 3 [Source:RGD Symbol;Acc:2323487];troponin I3, cardiac type [Source:RGD Symbol;Acc:62052]	0.232226	0.361112	0.142345	0.656005	0.490498	0.460709	0.457739	-1.1274	down
GO:0032481	positive regulation of type I interferon production	biological_process	8	0.120423	MSTRG.3425	Irf7	interferon regulatory factor 7 [Source:RGD Symbol;Acc:1307828]	3.76225	5.28163	2.92289	1.06032	1.17443	1.60451	3.11694	1.64013	up
GO:0016064	immunoglobulin mediated immune response	biological_process	8	0.120423	MSTRG.3425	Irf7	interferon regulatory factor 7 [Source:RGD Symbol;Acc:1307828]	3.76225	5.28163	2.92289	1.06032	1.17443	1.60451	3.11694	1.64013	up
GO:0035690	cellular response to drug	biological_process	6	0.122312	MSTRG.13940	Mt2A	metallothionein 2A [Source:RGD Symbol;Acc:1592345]	29.572	46.2534	20.3646	9.09823	9.9753	10.0336	3.30469	1.72452	up
GO:0035690	cellular response to drug	biological_process	6	0.122312	MSTRG.7077	Adipoq	adiponectin, C1Q and collagen domain containing [Source:RGD Symbol;Acc:628748]	1.56388	0.891889	1.23395	0.20421	0.211193	0.290087	5.23001	2.38681	up
GO:0006869	lipid transport	biological_process	7	0.122312	MSTRG.16024	Crabp2	cellular retinoic acid binding protein 2 [Source:RGD Symbol;Acc:62070]	2.61663	8.42398	7.11811	2.96094	3.12274	2.63796	2.08203	1.05799	up
GO:0006869	lipid transport	biological_process	7	0.122312	MSTRG.26142	Gpihbp1	glycosylphosphatidylinositol anchored high density lipoprotein binding protein 1 [Source:RGD Symbol;Acc:1564237]	2.63219	2.08795	1.30847	0.676363	0.879262	1.01499	2.3452	1.22971	up
GO:0006412	translation	biological_process	8	0.123497	MSTRG.11358	LOC690468	similar to 60S ribosomal protein L38 [Source:RGD Symbol;Acc:1596041]	8.73527	23.9417	6.2189	7.9823	2.56257	2.99969	2.8717	1.5219	up
GO:0006412	translation	biological_process	8	0.123497	MSTRG.16301	LOC685963	similar to 60S ribosomal protein L38 [Source:RGD Symbol;Acc:1587812]	9.62033	24.8426	7.96908	8.04825	3.22774	4.20371	2.74114	1.45478	up
GO:0006412	translation	biological_process	8	0.123497	MSTRG.23291	LOC100362149	ribosomal protein S20-like [Source:RGD Symbol;Acc:2318734]	5.17524	3.97197	5.25486	4.70844	14.5374	10.2089	0.488957	-1.03222	down
GO:0006412	translation	biological_process	8	0.123497	MSTRG.28226	AABR07071482		0.81612	0.929613	0.839154	2.29921	1.63257	2.67258	0.391391	-1.35332	down
GO:0006412	translation	biological_process	8	0.123497	MSTRG.28488	LOC100362684	ribosomal protein S20-like [Source:RGD Symbol;Acc:2324274]	4.34034	18.8852	4.45946	4.11471	2.30514	4.54696	2.52444	1.33596	up
GO:0006412	translation	biological_process	8	0.123497	MSTRG.7866	Rack1	receptor for activated C kinase 1 [Source:RGD Symbol;Acc:69229]	2.12116	1.74372	0.700888	3.26988	5.21372	1.65053	0.450533	-1.15029	down
GO:0006412	translation	biological_process	8	0.123497	MSTRG.9720	LOC100361259	60S ribosomal protein L13-like [Source:RGD Symbol;Acc:2320504]	0.491681	2.86215	2.46051	0.440434	0.334145	0.708102	3.92151	1.97141	up
GO:0010951	negative regulation of endopeptidase activity	biological_process	11	0.125367	ENSRNOG00000032728	LOC689230	similar to stefin A2 [Source:RGD Symbol;Acc:1594822]	0.669952	1.20217	0.384924	0.134809	0.198129	0.339906	3.35448	1.74609	up
GO:0010951	negative regulation of endopeptidase activity	biological_process	11	0.125367	MSTRG.19523	Eppin	epididymal peptidase inhibitor [Source:RGD Symbol;Acc:1597722]	0.324507	0.145258	0.262712	0.463882	0.553782	0.5654	0.462696	-1.11186	down
GO:0010951	negative regulation of endopeptidase activity	biological_process	11	0.125367	MSTRG.6911	AABR07034362	stefin A2 [Source:RGD Symbol;Acc:1562186]	12.1028	7.72974	9.06158	1.16056	2.96199	6.42592	2.73918	1.45374	up
GO:0099524	postsynaptic cytosol	cellular_component	4	0.126674	MSTRG.6522	LOC680121	similar to heat shock protein 8 [Source:RGD Symbol;Acc:1595502]	30.1405	38.296	22.6258	32.113	23.1973	149.677	0.444234	-1.17061	down
GO:0004950	chemokine receptor activity	molecular_function	8	0.126674	ENSRNOG00000006736	Ccr3	C-C motif chemokine receptor 3 [Source:RGD Symbol;Acc:620593]	0.539265	0.662872	0.240814	0.156602	0.179279	0.329123	2.16984	1.11759	up
GO:0031396	regulation of protein ubiquitination	biological_process	10	0.126674	MSTRG.17011	Hspa1b	heat shock protein family A (Hsp70) member 1B [Source:RGD Symbol;Acc:2840]	5.24329	5.52474	2.7742	7.21687	11.7813	14.7747	0.40098	-1.3184	down
GO:0001894	tissue homeostasis	biological_process	7	0.126674	MSTRG.1268	Ccn2	cellular communication network factor 2 [Source:RGD Symbol;Acc:621392]	97.162	163.002	90.2827	62.7941	47.5404	55.8168	2.1092	1.0767	up
GO:0007405	neuroblast proliferation	biological_process	5	0.126674	MSTRG.25662	Frs2	fibroblast growth factor receptor substrate 2 [Source:RGD Symbol;Acc:1308201]	1.85463	2.23289	2.7624	1.887	8.46212	8.22208	0.368846	-1.43891	down
GO:0001618	virus receptor activity	molecular_function	5	0.126674	ENSRNOG00000001926	Cldn1	claudin 1 [Source:RGD Symbol;Acc:68422]	0.488957	0.588734	0.237891	0.155539	0.268818	0.188699	2.14594	1.10161	up
GO:0030539	male genitalia development	biological_process	7	0.126674	MSTRG.13078	Greb1l	GREB1 like retinoic acid receptor coactivator [Source:RGD Symbol;Acc:1562371]	0.243967	0.318463	0.335822	0.11646	0.127973	0.1975	2.03255	1.02329	up
GO:1902236	negative regulation of endoplasmic reticulum stress-induced intrinsic apoptotic signaling pathway	biological_process	9	0.126674	MSTRG.17011	Hspa1b	heat shock protein family A (Hsp70) member 1B [Source:RGD Symbol;Acc:2840]	5.24329	5.52474	2.7742	7.21687	11.7813	14.7747	0.40098	-1.3184	down
GO:0000146	microfilament motor activity	molecular_function	10	0.13288	MSTRG.10649	Myh6	myosin heavy chain 7 [Source:RGD Symbol;Acc:62030];myosin heavy chain 6 [Source:RGD Symbol;Acc:62029]	0.997238	1.06135	0.328905	1.69535	2.31046	1.00868	0.476118	-1.07061	down
GO:0035591	signaling adaptor activity	molecular_function	6	0.13288	MSTRG.7866	Rack1	receptor for activated C kinase 1 [Source:RGD Symbol;Acc:69229]	2.12116	1.74372	0.700888	3.26988	5.21372	1.65053	0.450533	-1.15029	down
GO:0031295	T cell costimulation	biological_process	5	0.13288	ENSRNOG00000020872	Cd5	Cd5 molecule [Source:RGD Symbol;Acc:2309]	0.577905	0.540254	0.25983	0.0973373	0.177983	0.267674	2.53776	1.34356	up
GO:0008299	isoprenoid biosynthetic process	biological_process	8	0.13288	MSTRG.16315	Hmgcs2	3-hydroxy-3-methylglutaryl-CoA synthase 2 [Source:RGD Symbol;Acc:2804]	0.615012	0.301299	0.622912	0.289258	0.233091	0.131719	2.35331	1.23469	up
GO:0055093	response to hyperoxia	biological_process	5	0.13288	ENSRNOG00000019500	Cyp1a1	cytochrome P450, family 1, subfamily a, polypeptide 1 [Source:RGD Symbol;Acc:2458]	0.03592	0.0001	0.081544	0.280251	0.378238	0.727885	0.0847996	-3.5598	down
GO:0016601	Rac protein signal transduction	biological_process	8	0.139043	MSTRG.14618	Rhou	ras homolog family member U [Source:MGI Symbol;Acc:MGI:1916831]	2.42309	1.84505	2.54412	2.55395	2.5103	9.21669	0.477017	-1.06789	down
GO:0043537	negative regulation of blood vessel endothelial cell migration	biological_process	11	0.139043	ENSRNOG00000005008	Angpt4	angiopoietin 4 [Source:RGD Symbol;Acc:1307539]	0.957383	0.605696	0.869505	0.442478	0.367232	0.262644	2.26845	1.18171	up
GO:0030031	cell projection assembly	biological_process	6	0.139043	MSTRG.14618	Rhou	ras homolog family member U [Source:MGI Symbol;Acc:MGI:1916831]	2.42309	1.84505	2.54412	2.55395	2.5103	9.21669	0.477017	-1.06789	down
GO:0010613	positive regulation of cardiac muscle hypertrophy	biological_process	10	0.139043	ENSRNOG00000005964	Nr4a3	nuclear receptor subfamily 4, group A, member 3 [Source:RGD Symbol;Acc:61882]	0.829097	0.535612	0.350647	0.270902	0.310903	0.258833	2.04054	1.02895	up
GO:0102567	phospholipase A2 activity (consuming 1,2-dipalmitoylphosphatidylcholine	molecular_function	7	0.139043	ENSRNOG00000026764	Pla2g4c	phospholipase A2 group IVC [Source:RGD Symbol;Acc:1594658]	0.486308	0.281544	0.148092	0.0390525	0.0591423	0.217515	2.90122	1.53666	up
GO:0001502	cartilage condensation	biological_process	4	0.139043	MSTRG.1268	Ccn2	cellular communication network factor 2 [Source:RGD Symbol;Acc:621392]	97.162	163.002	90.2827	62.7941	47.5404	55.8168	2.1092	1.0767	up
GO:0071542	dopaminergic neuron differentiation	biological_process	7	0.139043	ENSRNOG00000003972	Tshr	thyroid stimulating hormone receptor [Source:RGD Symbol;Acc:3911]	0.489374	0.184589	0.289544	0.094947	0.190353	0.167872	2.12614	1.08824	up
GO:0001223	transcription coactivator binding	molecular_function	7	0.139043	ENSRNOG00000005964	Nr4a3	nuclear receptor subfamily 4, group A, member 3 [Source:RGD Symbol;Acc:61882]	0.829097	0.535612	0.350647	0.270902	0.310903	0.258833	2.04054	1.02895	up
GO:0004709	MAP kinase kinase kinase activity	molecular_function	9	0.139043	MSTRG.321	AABR07038029		1.34153	0.581293	1.06597	0.270944	0.433341	0.626478	2.24592	1.16731	up
GO:0019957	C-C chemokine binding	molecular_function	7	0.139043	ENSRNOG00000006736	Ccr3	C-C motif chemokine receptor 3 [Source:RGD Symbol;Acc:620593]	0.539265	0.662872	0.240814	0.156602	0.179279	0.329123	2.16984	1.11759	up
GO:0090303	positive regulation of wound healing	biological_process	9	0.139043	ENSRNOG00000001926	Cldn1	claudin 1 [Source:RGD Symbol;Acc:68422]	0.488957	0.588734	0.237891	0.155539	0.268818	0.188699	2.14594	1.10161	up
GO:0051131	chaperone-mediated protein complex assembly	biological_process	8	0.139043	MSTRG.17011	Hspa1b	heat shock protein family A (Hsp70) member 1B [Source:RGD Symbol;Acc:2840]	5.24329	5.52474	2.7742	7.21687	11.7813	14.7747	0.40098	-1.3184	down
GO:0006874	cellular calcium ion homeostasis	biological_process	11	0.143883	MSTRG.1771	Tnni3	dynein, axonemal, assembly factor 3 [Source:RGD Symbol;Acc:2323487];troponin I3, cardiac type [Source:RGD Symbol;Acc:62052]	0.232226	0.361112	0.142345	0.656005	0.490498	0.460709	0.457739	-1.1274	down
GO:0006874	cellular calcium ion homeostasis	biological_process	11	0.143883	MSTRG.2394	Csrp3	cysteine and glycine rich protein 3 [Source:RGD Symbol;Acc:71092]	0.636871	1.03978	0.697614	1.76671	2.35583	1.56165	0.417697	-1.25947	down
GO:0120162	positive regulation of cold-induced thermogenesis	biological_process	7	0.143883	ENSRNOG00000003972	Tshr	thyroid stimulating hormone receptor [Source:RGD Symbol;Acc:3911]	0.489374	0.184589	0.289544	0.094947	0.190353	0.167872	2.12614	1.08824	up
GO:0120162	positive regulation of cold-induced thermogenesis	biological_process	7	0.143883	MSTRG.7077	Adipoq	adiponectin, C1Q and collagen domain containing [Source:RGD Symbol;Acc:628748]	1.56388	0.891889	1.23395	0.20421	0.211193	0.290087	5.23001	2.38681	up
GO:0005506	iron ion binding	molecular_function	8	0.144707	ENSRNOG00000001739	Meltf	melanotransferrin [Source:RGD Symbol;Acc:1308155]	0.547705	1.43145	0.847265	0.639556	0.295855	0.228587	2.4282	1.27989	up
GO:0005506	iron ion binding	molecular_function	8	0.144707	ENSRNOG00000019500	Cyp1a1	cytochrome P450, family 1, subfamily a, polypeptide 1 [Source:RGD Symbol;Acc:2458]	0.03592	0.0001	0.081544	0.280251	0.378238	0.727885	0.0847996	-3.5598	down
GO:0005506	iron ion binding	molecular_function	8	0.144707	MSTRG.2963	AABR07005031		1.23131	1.57767	0.841578	3.18902	3.75164	4.00715	0.333451	-1.58445	down
GO:0008016	regulation of heart contraction	biological_process	8	0.145163	MSTRG.10649	Myh6	myosin heavy chain 7 [Source:RGD Symbol;Acc:62030];myosin heavy chain 6 [Source:RGD Symbol;Acc:62029]	0.997238	1.06135	0.328905	1.69535	2.31046	1.00868	0.476118	-1.07061	down
GO:0044458	motile cilium assembly	biological_process	8	0.145163	MSTRG.1771	Tnni3	dynein, axonemal, assembly factor 3 [Source:RGD Symbol;Acc:2323487];troponin I3, cardiac type [Source:RGD Symbol;Acc:62052]	0.232226	0.361112	0.142345	0.656005	0.490498	0.460709	0.457739	-1.1274	down
GO:0016493	C-C chemokine receptor activity	molecular_function	9	0.145163	ENSRNOG00000006736	Ccr3	C-C motif chemokine receptor 3 [Source:RGD Symbol;Acc:620593]	0.539265	0.662872	0.240814	0.156602	0.179279	0.329123	2.16984	1.11759	up
GO:0051262	protein tetramerization	biological_process	8	0.145163	ENSRNOG00000013053	Trpm6	transient receptor potential cation channel, subfamily M, member 6 [Source:RGD Symbol;Acc:1309942]	0.230886	0.220623	0.230274	0.013119	0.115142	0.093009	3.08123	1.6235	up
GO:0060065	uterus development	biological_process	6	0.145163	MSTRG.13078	Greb1l	GREB1 like retinoic acid receptor coactivator [Source:RGD Symbol;Acc:1562371]	0.243967	0.318463	0.335822	0.11646	0.127973	0.1975	2.03255	1.02329	up
GO:0032609	interferon-gamma production	biological_process	5	0.145163	MSTRG.29050	Il18rap	interleukin 18 receptor accessory protein [Source:RGD Symbol;Acc:727867]	3.58786	2.45648	3.08283	1.61627	1.37962	1.35237	2.09904	1.06973	up
GO:0005212	structural constituent of eye lens	molecular_function	4	0.145163	MSTRG.27342	Cryab	crystallin, alpha B [Source:RGD Symbol;Acc:2414]	4.40167	3.16475	1.93664	6.6383	11.8965	6.47058	0.380041	-1.39577	down
GO:0050731	positive regulation of peptidyl-tyrosine phosphorylation	biological_process	11	0.148781	ENSRNOG00000005008	Angpt4	angiopoietin 4 [Source:RGD Symbol;Acc:1307539]	0.957383	0.605696	0.869505	0.442478	0.367232	0.262644	2.26845	1.18171	up
GO:0050731	positive regulation of peptidyl-tyrosine phosphorylation	biological_process	11	0.148781	MSTRG.7077	Adipoq	adiponectin, C1Q and collagen domain containing [Source:RGD Symbol;Acc:628748]	1.56388	0.891889	1.23395	0.20421	0.211193	0.290087	5.23001	2.38681	up
GO:0006520	cellular amino acid metabolic process	biological_process	8	0.151239	ENSRNOG00000012843	Aspg	asparaginase [Source:RGD Symbol;Acc:708388]	1.24767	0.675715	0.661911	1.89691	2.03053	1.60372	0.467406	-1.09725	down
GO:0001968	fibronectin binding	molecular_function	5	0.151239	MSTRG.1268	Ccn2	cellular communication network factor 2 [Source:RGD Symbol;Acc:621392]	97.162	163.002	90.2827	62.7941	47.5404	55.8168	2.1092	1.0767	up
GO:0006882	cellular zinc ion homeostasis	biological_process	12	0.151239	MSTRG.13940	Mt2A	metallothionein 2A [Source:RGD Symbol;Acc:1592345]	29.572	46.2534	20.3646	9.09823	9.9753	10.0336	3.30469	1.72452	up
GO:0004190	aspartic-type endopeptidase activity	molecular_function	8	0.151239	MSTRG.23275	Ddi2	DNA damage inducible 1 homolog 2 [Source:RGD Symbol;Acc:1311815]	10.1342	3.79607	10.2228	3.09844	3.26578	3.1576	2.5366	1.34289	up
GO:0016234	inclusion body	cellular_component	5	0.151239	MSTRG.17011	Hspa1b	heat shock protein family A (Hsp70) member 1B [Source:RGD Symbol;Acc:2840]	5.24329	5.52474	2.7742	7.21687	11.7813	14.7747	0.40098	-1.3184	down
GO:0045216	cell-cell junction organization	biological_process	6	0.151239	ENSRNOG00000001926	Cldn1	claudin 1 [Source:RGD Symbol;Acc:68422]	0.488957	0.588734	0.237891	0.155539	0.268818	0.188699	2.14594	1.10161	up
GO:0042104	positive regulation of activated T cell proliferation	biological_process	12	0.151239	MSTRG.29376	Igfbp2	insulin-like growth factor binding protein 2 [Source:RGD Symbol;Acc:2873]	0.073613	0.214964	0.510057	2.1311	1.26299	0.635682	0.198184	-2.33509	down
GO:0035267	NuA4 histone acetyltransferase complex	cellular_component	9	0.151239	MSTRG.752	Morf4l2	mortality factor 4 like 2 [Source:RGD Symbol;Acc:1359471]	68.6344	76.9306	75.8236	18.1591	17.1081	17.1627	4.22256	2.07812	up
GO:0005104	fibroblast growth factor receptor binding	molecular_function	7	0.151239	MSTRG.25662	Frs2	fibroblast growth factor receptor substrate 2 [Source:RGD Symbol;Acc:1308201]	1.85463	2.23289	2.7624	1.887	8.46212	8.22208	0.368846	-1.43891	down
GO:0042803	protein homodimerization activity	molecular_function	6	0.152803	ENSRNOG00000005964	Nr4a3	nuclear receptor subfamily 4, group A, member 3 [Source:RGD Symbol;Acc:61882]	0.829097	0.535612	0.350647	0.270902	0.310903	0.258833	2.04054	1.02895	up
GO:0042803	protein homodimerization activity	molecular_function	6	0.152803	ENSRNOG00000032994	Myom3	myomesin 3 [Source:RGD Symbol;Acc:1310060]	0.440899	0.27448	0.374804	1.15099	1.0828	0.623768	0.381508	-1.39021	down
GO:0042803	protein homodimerization activity	molecular_function	6	0.152803	MSTRG.26667	Gpd1	glycerol-3-phosphate dehydrogenase 1 [Source:RGD Symbol;Acc:621381]	2.5	0.764599	1.04927	0.560462	0.529418	0.458827	2.78547	1.47792	up
GO:0042803	protein homodimerization activity	molecular_function	6	0.152803	MSTRG.27342	Cryab	crystallin, alpha B [Source:RGD Symbol;Acc:2414]	4.40167	3.16475	1.93664	6.6383	11.8965	6.47058	0.380041	-1.39577	down
GO:0042803	protein homodimerization activity	molecular_function	6	0.152803	MSTRG.7077	Adipoq	adiponectin, C1Q and collagen domain containing [Source:RGD Symbol;Acc:628748]	1.56388	0.891889	1.23395	0.20421	0.211193	0.290087	5.23001	2.38681	up
GO:0042803	protein homodimerization activity	molecular_function	6	0.152803	MSTRG.7866	Rack1	receptor for activated C kinase 1 [Source:RGD Symbol;Acc:69229]	2.12116	1.74372	0.700888	3.26988	5.21372	1.65053	0.450533	-1.15029	down
GO:0042803	protein homodimerization activity	molecular_function	6	0.152803	MSTRG.9426	Jchain	joining chain of multimeric IgA and IgM [Source:RGD Symbol;Acc:1310155]	132.362	133.248	97.0823	41.2594	54.0119	70.3597	2.18976	1.13077	up
GO:0003697	single-stranded DNA binding	molecular_function	7	0.153712	MSTRG.24842	AABR07065651	immunoglobulin heavy constant mu [Source:MGI Symbol;Acc:MGI:96448];immunoglobulin heavy chain 6 [Source:RGD Symbol;Acc:1359202]	108.546	104.979	81.0806	35.3749	47.6802	61.9222	2.03209	1.02296	up
GO:0003697	single-stranded DNA binding	molecular_function	7	0.153712	MSTRG.9426	Jchain	joining chain of multimeric IgA and IgM [Source:RGD Symbol;Acc:1310155]	132.362	133.248	97.0823	41.2594	54.0119	70.3597	2.18976	1.13077	up
GO:0044297	cell body	cellular_component	4	0.153712	MSTRG.17011	Hspa1b	heat shock protein family A (Hsp70) member 1B [Source:RGD Symbol;Acc:2840]	5.24329	5.52474	2.7742	7.21687	11.7813	14.7747	0.40098	-1.3184	down
GO:0044297	cell body	cellular_component	4	0.153712	MSTRG.7866	Rack1	receptor for activated C kinase 1 [Source:RGD Symbol;Acc:69229]	2.12116	1.74372	0.700888	3.26988	5.21372	1.65053	0.450533	-1.15029	down
GO:0003735	structural constituent of ribosome	molecular_function	4	0.155648	MSTRG.11358	LOC690468	similar to 60S ribosomal protein L38 [Source:RGD Symbol;Acc:1596041]	8.73527	23.9417	6.2189	7.9823	2.56257	2.99969	2.8717	1.5219	up
GO:0003735	structural constituent of ribosome	molecular_function	4	0.155648	MSTRG.16301	LOC685963	similar to 60S ribosomal protein L38 [Source:RGD Symbol;Acc:1587812]	9.62033	24.8426	7.96908	8.04825	3.22774	4.20371	2.74114	1.45478	up
GO:0003735	structural constituent of ribosome	molecular_function	4	0.155648	MSTRG.23291	LOC100362149	ribosomal protein S20-like [Source:RGD Symbol;Acc:2318734]	5.17524	3.97197	5.25486	4.70844	14.5374	10.2089	0.488957	-1.03222	down
GO:0003735	structural constituent of ribosome	molecular_function	4	0.155648	MSTRG.28226	AABR07071482		0.81612	0.929613	0.839154	2.29921	1.63257	2.67258	0.391391	-1.35332	down
GO:0003735	structural constituent of ribosome	molecular_function	4	0.155648	MSTRG.28488	LOC100362684	ribosomal protein S20-like [Source:RGD Symbol;Acc:2324274]	4.34034	18.8852	4.45946	4.11471	2.30514	4.54696	2.52444	1.33596	up
GO:0003735	structural constituent of ribosome	molecular_function	4	0.155648	MSTRG.9720	LOC100361259	60S ribosomal protein L13-like [Source:RGD Symbol;Acc:2320504]	0.491681	2.86215	2.46051	0.440434	0.334145	0.708102	3.92151	1.97141	up
GO:0001525	angiogenesis	biological_process	5	0.156418	ENSRNOG00000005008	Angpt4	angiopoietin 4 [Source:RGD Symbol;Acc:1307539]	0.957383	0.605696	0.869505	0.442478	0.367232	0.262644	2.26845	1.18171	up
GO:0001525	angiogenesis	biological_process	5	0.156418	MSTRG.1268	Ccn2	cellular communication network factor 2 [Source:RGD Symbol;Acc:621392]	97.162	163.002	90.2827	62.7941	47.5404	55.8168	2.1092	1.0767	up
GO:0001525	angiogenesis	biological_process	5	0.156418	MSTRG.23343	Angptl7	angiopoietin like 7 [Source:RGD Symbol;Acc:7553363]	7.81835	7.9259	4.33571	2.35398	2.94155	2.14646	2.6982	1.432	up
GO:0007205	protein kinase C-activating G protein-coupled receptor signaling pathway	biological_process	6	0.157272	MSTRG.7866	Rack1	receptor for activated C kinase 1 [Source:RGD Symbol;Acc:69229]	2.12116	1.74372	0.700888	3.26988	5.21372	1.65053	0.450533	-1.15029	down
GO:0048738	cardiac muscle tissue development	biological_process	8	0.157272	MSTRG.2394	Csrp3	cysteine and glycine rich protein 3 [Source:RGD Symbol;Acc:71092]	0.636871	1.03978	0.697614	1.76671	2.35583	1.56165	0.417697	-1.25947	down
GO:0033365	protein localization to organelle	biological_process	7	0.157272	MSTRG.2394	Csrp3	cysteine and glycine rich protein 3 [Source:RGD Symbol;Acc:71092]	0.636871	1.03978	0.697614	1.76671	2.35583	1.56165	0.417697	-1.25947	down
GO:0032094	response to food	biological_process	7	0.157272	ENSRNOG00000019500	Cyp1a1	cytochrome P450, family 1, subfamily a, polypeptide 1 [Source:RGD Symbol;Acc:2458]	0.03592	0.0001	0.081544	0.280251	0.378238	0.727885	0.0847996	-3.5598	down
GO:0002437	inflammatory response to antigenic stimulus	biological_process	7	0.157272	MSTRG.1247	RGD1559962	similar to High mobility group protein 2 (HMG-2) [Source:RGD Symbol;Acc:1559962]	2.0089	1.58098	1.57628	1.87562	4.21377	5.19355	0.457874	-1.12698	down
GO:0001891	phagocytic cup	cellular_component	5	0.157272	MSTRG.7866	Rack1	receptor for activated C kinase 1 [Source:RGD Symbol;Acc:69229]	2.12116	1.74372	0.700888	3.26988	5.21372	1.65053	0.450533	-1.15029	down
GO:0042629	mast cell granule	cellular_component	9	0.157272	ENSRNOG00000005964	Nr4a3	nuclear receptor subfamily 4, group A, member 3 [Source:RGD Symbol;Acc:61882]	0.829097	0.535612	0.350647	0.270902	0.310903	0.258833	2.04054	1.02895	up
GO:0004540	ribonuclease activity	molecular_function	7	0.157272	MSTRG.10586	Rnase6	ribonuclease A family member k6 [Source:RGD Symbol;Acc:1303020]	2.74194	2.3303	1.68547	1.0146	0.903928	1.33617	2.0763	1.05401	up
GO:0033137	negative regulation of peptidyl-serine phosphorylation	biological_process	11	0.163263	MSTRG.7866	Rack1	receptor for activated C kinase 1 [Source:RGD Symbol;Acc:69229]	2.12116	1.74372	0.700888	3.26988	5.21372	1.65053	0.450533	-1.15029	down
GO:0090103	cochlea morphogenesis	biological_process	6	0.163263	ENSRNOG00000003972	Tshr	thyroid stimulating hormone receptor [Source:RGD Symbol;Acc:3911]	0.489374	0.184589	0.289544	0.094947	0.190353	0.167872	2.12614	1.08824	up
GO:0002009	morphogenesis of an epithelium	biological_process	6	0.163263	ENSRNOG00000002053	Fras1	Fraser extracellular matrix complex subunit 1 [Source:RGD Symbol;Acc:1306516]	0.139257	0.067374	0.065133	0.196717	0.15547	0.194714	0.496916	-1.00893	down
GO:0035235	ionotropic glutamate receptor signaling pathway	biological_process	7	0.163263	ENSRNOG00000045816	Gria1	glutamate ionotropic receptor AMPA type subunit 1 [Source:RGD Symbol;Acc:621531]	0.153662	0.0781212	0.0762892	0.328888	0.272742	0.303107	0.34051	-1.55423	down
GO:0032281	AMPA glutamate receptor complex	cellular_component	8	0.163263	ENSRNOG00000045816	Gria1	glutamate ionotropic receptor AMPA type subunit 1 [Source:RGD Symbol;Acc:621531]	0.153662	0.0781212	0.0762892	0.328888	0.272742	0.303107	0.34051	-1.55423	down
GO:0033189	response to vitamin A	biological_process	9	0.163263	ENSRNOG00000019500	Cyp1a1	cytochrome P450, family 1, subfamily a, polypeptide 1 [Source:RGD Symbol;Acc:2458]	0.03592	0.0001	0.081544	0.280251	0.378238	0.727885	0.0847996	-3.5598	down
GO:0010906	regulation of glucose metabolic process	biological_process	9	0.163263	MSTRG.7077	Adipoq	adiponectin, C1Q and collagen domain containing [Source:RGD Symbol;Acc:628748]	1.56388	0.891889	1.23395	0.20421	0.211193	0.290087	5.23001	2.38681	up
GO:0001666	response to hypoxia	biological_process	5	0.164958	ENSRNOG00000019500	Cyp1a1	cytochrome P450, family 1, subfamily a, polypeptide 1 [Source:RGD Symbol;Acc:2458]	0.03592	0.0001	0.081544	0.280251	0.378238	0.727885	0.0847996	-3.5598	down
GO:0001666	response to hypoxia	biological_process	5	0.164958	MSTRG.27342	Cryab	crystallin, alpha B [Source:RGD Symbol;Acc:2414]	4.40167	3.16475	1.93664	6.6383	11.8965	6.47058	0.380041	-1.39577	down
GO:0001666	response to hypoxia	biological_process	5	0.164958	MSTRG.7077	Adipoq	adiponectin, C1Q and collagen domain containing [Source:RGD Symbol;Acc:628748]	1.56388	0.891889	1.23395	0.20421	0.211193	0.290087	5.23001	2.38681	up
GO:0001934	positive regulation of protein phosphorylation	biological_process	10	0.164958	MSTRG.1268	Ccn2	cellular communication network factor 2 [Source:RGD Symbol;Acc:621392]	97.162	163.002	90.2827	62.7941	47.5404	55.8168	2.1092	1.0767	up
GO:0001934	positive regulation of protein phosphorylation	biological_process	10	0.164958	MSTRG.7077	Adipoq	adiponectin, C1Q and collagen domain containing [Source:RGD Symbol;Acc:628748]	1.56388	0.891889	1.23395	0.20421	0.211193	0.290087	5.23001	2.38681	up
GO:0001934	positive regulation of protein phosphorylation	biological_process	10	0.164958	MSTRG.7866	Rack1	receptor for activated C kinase 1 [Source:RGD Symbol;Acc:69229]	2.12116	1.74372	0.700888	3.26988	5.21372	1.65053	0.450533	-1.15029	down
GO:0032496	response to lipopolysaccharide	biological_process	7	0.166683	ENSRNOG00000001926	Cldn1	claudin 1 [Source:RGD Symbol;Acc:68422]	0.488957	0.588734	0.237891	0.155539	0.268818	0.188699	2.14594	1.10161	up
GO:0032496	response to lipopolysaccharide	biological_process	7	0.166683	ENSRNOG00000019500	Cyp1a1	cytochrome P450, family 1, subfamily a, polypeptide 1 [Source:RGD Symbol;Acc:2458]	0.03592	0.0001	0.081544	0.280251	0.378238	0.727885	0.0847996	-3.5598	down
GO:0032496	response to lipopolysaccharide	biological_process	7	0.166683	MSTRG.1247	RGD1559962	similar to High mobility group protein 2 (HMG-2) [Source:RGD Symbol;Acc:1559962]	2.0089	1.58098	1.57628	1.87562	4.21377	5.19355	0.457874	-1.12698	down
GO:0032967	positive regulation of collagen biosynthetic process	biological_process	8	0.169211	MSTRG.1268	Ccn2	cellular communication network factor 2 [Source:RGD Symbol;Acc:621392]	97.162	163.002	90.2827	62.7941	47.5404	55.8168	2.1092	1.0767	up
GO:0007163	establishment or maintenance of cell polarity	biological_process	4	0.169211	MSTRG.27243	Cd3g	CD3g molecule [Source:RGD Symbol;Acc:1307718]	3.1597	3.36923	1.43494	0.802837	0.611571	1.27998	2.95572	1.56351	up
GO:0046488	phosphatidylinositol metabolic process	biological_process	9	0.169211	MSTRG.12982	AABR07028795		3.72587	3.84149	3.80138	1.79371	1.60476	1.97497	2.11573	1.08116	up
GO:0008199	ferric iron binding	molecular_function	9	0.169211	MSTRG.2963	AABR07005031		1.23131	1.57767	0.841578	3.18902	3.75164	4.00715	0.333451	-1.58445	down
GO:0070372	regulation of ERK1 and ERK2 cascade	biological_process	11	0.169211	MSTRG.25662	Frs2	fibroblast growth factor receptor substrate 2 [Source:RGD Symbol;Acc:1308201]	1.85463	2.23289	2.7624	1.887	8.46212	8.22208	0.368846	-1.43891	down
GO:0061436	establishment of skin barrier	biological_process	10	0.169211	ENSRNOG00000001926	Cldn1	claudin 1 [Source:RGD Symbol;Acc:68422]	0.488957	0.588734	0.237891	0.155539	0.268818	0.188699	2.14594	1.10161	up
GO:0006953	acute-phase response	biological_process	8	0.169211	MSTRG.22340	Orm1	orosomucoid 1 [Source:RGD Symbol;Acc:67390]	4.8938	3.42053	6.50671	1.77483	2.27479	2.66802	2.20629	1.14162	up
GO:0070330	aromatase activity	molecular_function	7	0.169211	ENSRNOG00000019500	Cyp1a1	cytochrome P450, family 1, subfamily a, polypeptide 1 [Source:RGD Symbol;Acc:2458]	0.03592	0.0001	0.081544	0.280251	0.378238	0.727885	0.0847996	-3.5598	down
GO:2000378	negative regulation of reactive oxygen species metabolic process	biological_process	8	0.169211	MSTRG.27342	Cryab	crystallin, alpha B [Source:RGD Symbol;Acc:2414]	4.40167	3.16475	1.93664	6.6383	11.8965	6.47058	0.380041	-1.39577	down
GO:0060122	inner ear receptor cell stereocilium organization	biological_process	8	0.169211	ENSRNOG00000003972	Tshr	thyroid stimulating hormone receptor [Source:RGD Symbol;Acc:3911]	0.489374	0.184589	0.289544	0.094947	0.190353	0.167872	2.12614	1.08824	up
GO:0001501	skeletal system development	biological_process	6	0.171209	MSTRG.11358	LOC690468	similar to 60S ribosomal protein L38 [Source:RGD Symbol;Acc:1596041]	8.73527	23.9417	6.2189	7.9823	2.56257	2.99969	2.8717	1.5219	up
GO:0001501	skeletal system development	biological_process	6	0.171209	MSTRG.16301	LOC685963	similar to 60S ribosomal protein L38 [Source:RGD Symbol;Acc:1587812]	9.62033	24.8426	7.96908	8.04825	3.22774	4.20371	2.74114	1.45478	up
GO:0034394	protein localization to cell surface	biological_process	7	0.175117	MSTRG.26142	Gpihbp1	glycosylphosphatidylinositol anchored high density lipoprotein binding protein 1 [Source:RGD Symbol;Acc:1564237]	2.63219	2.08795	1.30847	0.676363	0.879262	1.01499	2.3452	1.22971	up
GO:0001702	gastrulation with mouth forming second	biological_process	7	0.175117	MSTRG.25662	Frs2	fibroblast growth factor receptor substrate 2 [Source:RGD Symbol;Acc:1308201]	1.85463	2.23289	2.7624	1.887	8.46212	8.22208	0.368846	-1.43891	down
GO:0030522	intracellular receptor signaling pathway	biological_process	5	0.175117	ENSRNOG00000005964	Nr4a3	nuclear receptor subfamily 4, group A, member 3 [Source:RGD Symbol;Acc:61882]	0.829097	0.535612	0.350647	0.270902	0.310903	0.258833	2.04054	1.02895	up
GO:0015276	ligand-gated ion channel activity	molecular_function	7	0.175117	ENSRNOG00000045816	Gria1	glutamate ionotropic receptor AMPA type subunit 1 [Source:RGD Symbol;Acc:621531]	0.153662	0.0781212	0.0762892	0.328888	0.272742	0.303107	0.34051	-1.55423	down
GO:0050807	regulation of synapse organization	biological_process	7	0.175117	ENSRNOG00000008054	Igsf9	immunoglobulin superfamily, member 9 [Source:RGD Symbol;Acc:1304566]	0.292083	0.261639	0.287037	0.673067	0.658462	0.633483	0.427864	-1.22477	down
GO:0032590	dendrite membrane	cellular_component	7	0.175117	ENSRNOG00000045816	Gria1	glutamate ionotropic receptor AMPA type subunit 1 [Source:RGD Symbol;Acc:621531]	0.153662	0.0781212	0.0762892	0.328888	0.272742	0.303107	0.34051	-1.55423	down
GO:0045202	synapse	cellular_component	3	0.176496	ENSRNOG00000008054	Igsf9	immunoglobulin superfamily, member 9 [Source:RGD Symbol;Acc:1304566]	0.292083	0.261639	0.287037	0.673067	0.658462	0.633483	0.427864	-1.22477	down
GO:0045202	synapse	cellular_component	3	0.176496	ENSRNOG00000045816	Gria1	glutamate ionotropic receptor AMPA type subunit 1 [Source:RGD Symbol;Acc:621531]	0.153662	0.0781212	0.0762892	0.328888	0.272742	0.303107	0.34051	-1.55423	down
GO:0045202	synapse	cellular_component	3	0.176496	MSTRG.11358	LOC690468	similar to 60S ribosomal protein L38 [Source:RGD Symbol;Acc:1596041]	8.73527	23.9417	6.2189	7.9823	2.56257	2.99969	2.8717	1.5219	up
GO:0045202	synapse	cellular_component	3	0.176496	MSTRG.16301	LOC685963	similar to 60S ribosomal protein L38 [Source:RGD Symbol;Acc:1587812]	9.62033	24.8426	7.96908	8.04825	3.22774	4.20371	2.74114	1.45478	up
GO:0045202	synapse	cellular_component	3	0.176496	MSTRG.23291	LOC100362149	ribosomal protein S20-like [Source:RGD Symbol;Acc:2318734]	5.17524	3.97197	5.25486	4.70844	14.5374	10.2089	0.488957	-1.03222	down
GO:0045202	synapse	cellular_component	3	0.176496	MSTRG.27342	Cryab	crystallin, alpha B [Source:RGD Symbol;Acc:2414]	4.40167	3.16475	1.93664	6.6383	11.8965	6.47058	0.380041	-1.39577	down
GO:0045202	synapse	cellular_component	3	0.176496	MSTRG.28488	LOC100362684	ribosomal protein S20-like [Source:RGD Symbol;Acc:2324274]	4.34034	18.8852	4.45946	4.11471	2.30514	4.54696	2.52444	1.33596	up
GO:0016887	ATPase activity	molecular_function	9	0.178901	MSTRG.10649	Myh6	myosin heavy chain 7 [Source:RGD Symbol;Acc:62030];myosin heavy chain 6 [Source:RGD Symbol;Acc:62029]	0.997238	1.06135	0.328905	1.69535	2.31046	1.00868	0.476118	-1.07061	down
GO:0016887	ATPase activity	molecular_function	9	0.178901	MSTRG.17011	Hspa1b	heat shock protein family A (Hsp70) member 1B [Source:RGD Symbol;Acc:2840]	5.24329	5.52474	2.7742	7.21687	11.7813	14.7747	0.40098	-1.3184	down
GO:0016887	ATPase activity	molecular_function	9	0.178901	MSTRG.6522	LOC680121	similar to heat shock protein 8 [Source:RGD Symbol;Acc:1595502]	30.1405	38.296	22.6258	32.113	23.1973	149.677	0.444234	-1.17061	down
GO:0030001	metal ion transport	biological_process	8	0.180982	ENSRNOG00000013053	Trpm6	transient receptor potential cation channel, subfamily M, member 6 [Source:RGD Symbol;Acc:1309942]	0.230886	0.220623	0.230274	0.013119	0.115142	0.093009	3.08123	1.6235	up
GO:0004623	phospholipase A2 activity	molecular_function	8	0.180982	ENSRNOG00000026764	Pla2g4c	phospholipase A2 group IVC [Source:RGD Symbol;Acc:1594658]	0.486308	0.281544	0.148092	0.0390525	0.0591423	0.217515	2.90122	1.53666	up
GO:0070542	response to fatty acid	biological_process	6	0.180982	MSTRG.1268	Ccn2	cellular communication network factor 2 [Source:RGD Symbol;Acc:621392]	97.162	163.002	90.2827	62.7941	47.5404	55.8168	2.1092	1.0767	up
GO:0071897	DNA biosynthetic process	biological_process	8	0.180982	MSTRG.1268	Ccn2	cellular communication network factor 2 [Source:RGD Symbol;Acc:621392]	97.162	163.002	90.2827	62.7941	47.5404	55.8168	2.1092	1.0767	up
GO:0006457	protein folding	biological_process	4	0.183901	MSTRG.17011	Hspa1b	heat shock protein family A (Hsp70) member 1B [Source:RGD Symbol;Acc:2840]	5.24329	5.52474	2.7742	7.21687	11.7813	14.7747	0.40098	-1.3184	down
GO:0006457	protein folding	biological_process	4	0.183901	MSTRG.27342	Cryab	crystallin, alpha B [Source:RGD Symbol;Acc:2414]	4.40167	3.16475	1.93664	6.6383	11.8965	6.47058	0.380041	-1.39577	down
GO:0016042	lipid catabolic process	biological_process	6	0.183901	ENSRNOG00000015086	Plin1	perilipin 1 [Source:RGD Symbol;Acc:3351]	0.58075	0.293959	0.488433	0.106797	0.123819	0.12879	3.79277	1.92325	up
GO:0016042	lipid catabolic process	biological_process	6	0.183901	ENSRNOG00000026764	Pla2g4c	phospholipase A2 group IVC [Source:RGD Symbol;Acc:1594658]	0.486308	0.281544	0.148092	0.0390525	0.0591423	0.217515	2.90122	1.53666	up
GO:0006402	mRNA catabolic process	biological_process	10	0.186805	MSTRG.17011	Hspa1b	heat shock protein family A (Hsp70) member 1B [Source:RGD Symbol;Acc:2840]	5.24329	5.52474	2.7742	7.21687	11.7813	14.7747	0.40098	-1.3184	down
GO:0004620	phospholipase activity	molecular_function	7	0.186805	ENSRNOG00000026764	Pla2g4c	phospholipase A2 group IVC [Source:RGD Symbol;Acc:1594658]	0.486308	0.281544	0.148092	0.0390525	0.0591423	0.217515	2.90122	1.53666	up
GO:0035035	histone acetyltransferase binding	molecular_function	6	0.192587	ENSRNOG00000005964	Nr4a3	nuclear receptor subfamily 4, group A, member 3 [Source:RGD Symbol;Acc:61882]	0.829097	0.535612	0.350647	0.270902	0.310903	0.258833	2.04054	1.02895	up
GO:0006094	gluconeogenesis	biological_process	9	0.192587	MSTRG.26667	Gpd1	glycerol-3-phosphate dehydrogenase 1 [Source:RGD Symbol;Acc:621381]	2.5	0.764599	1.04927	0.560462	0.529418	0.458827	2.78547	1.47792	up
GO:0045776	negative regulation of blood pressure	biological_process	6	0.192587	MSTRG.7077	Adipoq	adiponectin, C1Q and collagen domain containing [Source:RGD Symbol;Acc:628748]	1.56388	0.891889	1.23395	0.20421	0.211193	0.290087	5.23001	2.38681	up
GO:0000123	histone acetyltransferase complex	cellular_component	6	0.192587	MSTRG.752	Morf4l2	mortality factor 4 like 2 [Source:RGD Symbol;Acc:1359471]	68.6344	76.9306	75.8236	18.1591	17.1081	17.1627	4.22256	2.07812	up
GO:0070328	triglyceride homeostasis	biological_process	9	0.192587	MSTRG.26142	Gpihbp1	glycosylphosphatidylinositol anchored high density lipoprotein binding protein 1 [Source:RGD Symbol;Acc:1564237]	2.63219	2.08795	1.30847	0.676363	0.879262	1.01499	2.3452	1.22971	up
GO:0010498	proteasomal protein catabolic process	biological_process	8	0.192587	MSTRG.23275	Ddi2	DNA damage inducible 1 homolog 2 [Source:RGD Symbol;Acc:1311815]	10.1342	3.79607	10.2228	3.09844	3.26578	3.1576	2.5366	1.34289	up
GO:0016239	positive regulation of macroautophagy	biological_process	10	0.198329	MSTRG.14059	Scoc	short coiled-coil protein [Source:RGD Symbol;Acc:1311860]	10.7525	4.35	10.9578	3.38544	3.16803	3.38759	2.62148	1.39038	up
GO:0008180	COP9 signalosome	cellular_component	4	0.198329	MSTRG.17011	Hspa1b	heat shock protein family A (Hsp70) member 1B [Source:RGD Symbol;Acc:2840]	5.24329	5.52474	2.7742	7.21687	11.7813	14.7747	0.40098	-1.3184	down
GO:0035902	response to immobilization stress	biological_process	5	0.198329	ENSRNOG00000019500	Cyp1a1	cytochrome P450, family 1, subfamily a, polypeptide 1 [Source:RGD Symbol;Acc:2458]	0.03592	0.0001	0.081544	0.280251	0.378238	0.727885	0.0847996	-3.5598	down
GO:0098839	postsynaptic density membrane	cellular_component	5	0.198329	ENSRNOG00000045816	Gria1	glutamate ionotropic receptor AMPA type subunit 1 [Source:RGD Symbol;Acc:621531]	0.153662	0.0781212	0.0762892	0.328888	0.272742	0.303107	0.34051	-1.55423	down
GO:0032728	positive regulation of interferon-beta production	biological_process	9	0.198329	MSTRG.3425	Irf7	interferon regulatory factor 7 [Source:RGD Symbol;Acc:1307828]	3.76225	5.28163	2.92289	1.06032	1.17443	1.60451	3.11694	1.64013	up
GO:1900087	positive regulation of G1/S transition of mitotic cell cycle	biological_process	10	0.198329	ENSRNOG00000019500	Cyp1a1	cytochrome P450, family 1, subfamily a, polypeptide 1 [Source:RGD Symbol;Acc:2458]	0.03592	0.0001	0.081544	0.280251	0.378238	0.727885	0.0847996	-3.5598	down
GO:0002027	regulation of heart rate	biological_process	9	0.198329	MSTRG.10649	Myh6	myosin heavy chain 7 [Source:RGD Symbol;Acc:62030];myosin heavy chain 6 [Source:RGD Symbol;Acc:62029]	0.997238	1.06135	0.328905	1.69535	2.31046	1.00868	0.476118	-1.07061	down
GO:0097009	energy homeostasis	biological_process	5	0.198329	ENSRNOG00000005964	Nr4a3	nuclear receptor subfamily 4, group A, member 3 [Source:RGD Symbol;Acc:61882]	0.829097	0.535612	0.350647	0.270902	0.310903	0.258833	2.04054	1.02895	up
GO:0045648	positive regulation of erythrocyte differentiation	biological_process	9	0.198329	MSTRG.17011	Hspa1b	heat shock protein family A (Hsp70) member 1B [Source:RGD Symbol;Acc:2840]	5.24329	5.52474	2.7742	7.21687	11.7813	14.7747	0.40098	-1.3184	down
GO:1904315	transmitter-gated ion channel activity involved in regulation of postsynaptic membrane potential	molecular_function	10	0.198329	ENSRNOG00000045816	Gria1	glutamate ionotropic receptor AMPA type subunit 1 [Source:RGD Symbol;Acc:621531]	0.153662	0.0781212	0.0762892	0.328888	0.272742	0.303107	0.34051	-1.55423	down
GO:0071480	cellular response to gamma radiation	biological_process	8	0.198329	MSTRG.27342	Cryab	crystallin, alpha B [Source:RGD Symbol;Acc:2414]	4.40167	3.16475	1.93664	6.6383	11.8965	6.47058	0.380041	-1.39577	down
GO:0008528	G protein-coupled peptide receptor activity	molecular_function	6	0.198329	ENSRNOG00000000873	Brs3	bombesin receptor subtype 3 [Source:RGD Symbol;Acc:628645]	0.684856	0.476728	0.325205	0.138879	0.100965	0.373652	2.42347	1.27707	up
GO:0005102	signaling receptor binding	molecular_function	5	0.199073	ENSRNOG00000005008	Angpt4	angiopoietin 4 [Source:RGD Symbol;Acc:1307539]	0.957383	0.605696	0.869505	0.442478	0.367232	0.262644	2.26845	1.18171	up
GO:0005102	signaling receptor binding	molecular_function	5	0.199073	MSTRG.17011	Hspa1b	heat shock protein family A (Hsp70) member 1B [Source:RGD Symbol;Acc:2840]	5.24329	5.52474	2.7742	7.21687	11.7813	14.7747	0.40098	-1.3184	down
GO:0005102	signaling receptor binding	molecular_function	5	0.199073	MSTRG.23343	Angptl7	angiopoietin like 7 [Source:RGD Symbol;Acc:7553363]	7.81835	7.9259	4.33571	2.35398	2.94155	2.14646	2.6982	1.432	up
GO:0005102	signaling receptor binding	molecular_function	5	0.199073	MSTRG.7077	Adipoq	adiponectin, C1Q and collagen domain containing [Source:RGD Symbol;Acc:628748]	1.56388	0.891889	1.23395	0.20421	0.211193	0.290087	5.23001	2.38681	up
GO:0008395	steroid hydroxylase activity	molecular_function	6	0.20403	ENSRNOG00000019500	Cyp1a1	cytochrome P450, family 1, subfamily a, polypeptide 1 [Source:RGD Symbol;Acc:2458]	0.03592	0.0001	0.081544	0.280251	0.378238	0.727885	0.0847996	-3.5598	down
GO:0006959	humoral immune response	biological_process	5	0.20403	MSTRG.9426	Jchain	joining chain of multimeric IgA and IgM [Source:RGD Symbol;Acc:1310155]	132.362	133.248	97.0823	41.2594	54.0119	70.3597	2.18976	1.13077	up
GO:0071276	cellular response to cadmium ion	biological_process	8	0.20403	MSTRG.13940	Mt2A	metallothionein 2A [Source:RGD Symbol;Acc:1592345]	29.572	46.2534	20.3646	9.09823	9.9753	10.0336	3.30469	1.72452	up
GO:0046718	viral entry into host cell	biological_process	9	0.20969	ENSRNOG00000001926	Cldn1	claudin 1 [Source:RGD Symbol;Acc:68422]	0.488957	0.588734	0.237891	0.155539	0.268818	0.188699	2.14594	1.10161	up
GO:0043967	histone H4 acetylation	biological_process	11	0.20969	MSTRG.752	Morf4l2	mortality factor 4 like 2 [Source:RGD Symbol;Acc:1359471]	68.6344	76.9306	75.8236	18.1591	17.1081	17.1627	4.22256	2.07812	up
GO:0042572	retinol metabolic process	biological_process	11	0.20969	ENSRNOG00000019500	Cyp1a1	cytochrome P450, family 1, subfamily a, polypeptide 1 [Source:RGD Symbol;Acc:2458]	0.03592	0.0001	0.081544	0.280251	0.378238	0.727885	0.0847996	-3.5598	down
GO:0032870	cellular response to hormone stimulus	biological_process	6	0.20969	MSTRG.29376	Igfbp2	insulin-like growth factor binding protein 2 [Source:RGD Symbol;Acc:2873]	0.073613	0.214964	0.510057	2.1311	1.26299	0.635682	0.198184	-2.33509	down
GO:0051059	NF-kappaB binding	molecular_function	8	0.20969	MSTRG.17011	Hspa1b	heat shock protein family A (Hsp70) member 1B [Source:RGD Symbol;Acc:2840]	5.24329	5.52474	2.7742	7.21687	11.7813	14.7747	0.40098	-1.3184	down
GO:0044853	plasma membrane raft	cellular_component	7	0.20969	MSTRG.19016	Mal	mal, T-cell differentiation protein [Source:RGD Symbol;Acc:3037]	1.70514	1.76004	1.8063	0.88808	0.918323	0.823618	2.00435	1.00314	up
GO:0062023	collagen-containing extracellular matrix	cellular_component	5	0.212254	ENSRNOG00000005008	Angpt4	angiopoietin 4 [Source:RGD Symbol;Acc:1307539]	0.957383	0.605696	0.869505	0.442478	0.367232	0.262644	2.26845	1.18171	up
GO:0062023	collagen-containing extracellular matrix	cellular_component	5	0.212254	MSTRG.23343	Angptl7	angiopoietin like 7 [Source:RGD Symbol;Acc:7553363]	7.81835	7.9259	4.33571	2.35398	2.94155	2.14646	2.6982	1.432	up
GO:2001244	positive regulation of intrinsic apoptotic signaling pathway	biological_process	10	0.215311	MSTRG.7866	Rack1	receptor for activated C kinase 1 [Source:RGD Symbol;Acc:69229]	2.12116	1.74372	0.700888	3.26988	5.21372	1.65053	0.450533	-1.15029	down
GO:0035115	embryonic forelimb morphogenesis	biological_process	8	0.215311	MSTRG.16024	Crabp2	cellular retinoic acid binding protein 2 [Source:RGD Symbol;Acc:62070]	2.61663	8.42398	7.11811	2.96094	3.12274	2.63796	2.08203	1.05799	up
GO:0035458	cellular response to interferon-beta	biological_process	8	0.215311	MSTRG.4039	Ifit3	interferon-induced protein with tetratricopeptide repeats 3 [Source:RGD Symbol;Acc:1359681]	4.97721	3.52241	3.21606	1.3741	1.53573	2.40418	2.20468	1.14057	up
GO:0030534	adult behavior	biological_process	4	0.215311	ENSRNOG00000005964	Nr4a3	nuclear receptor subfamily 4, group A, member 3 [Source:RGD Symbol;Acc:61882]	0.829097	0.535612	0.350647	0.270902	0.310903	0.258833	2.04054	1.02895	up
GO:0042593	glucose homeostasis	biological_process	8	0.220064	MSTRG.2394	Csrp3	cysteine and glycine rich protein 3 [Source:RGD Symbol;Acc:71092]	0.636871	1.03978	0.697614	1.76671	2.35583	1.56165	0.417697	-1.25947	down
GO:0042593	glucose homeostasis	biological_process	8	0.220064	MSTRG.7077	Adipoq	adiponectin, C1Q and collagen domain containing [Source:RGD Symbol;Acc:628748]	1.56388	0.891889	1.23395	0.20421	0.211193	0.290087	5.23001	2.38681	up
GO:0007154	cell communication	biological_process	4	0.220891	ENSRNOG00000002053	Fras1	Fraser extracellular matrix complex subunit 1 [Source:RGD Symbol;Acc:1306516]	0.139257	0.067374	0.065133	0.196717	0.15547	0.194714	0.496916	-1.00893	down
GO:0090501	RNA phosphodiester bond hydrolysis	biological_process	9	0.220891	MSTRG.10586	Rnase6	ribonuclease A family member k6 [Source:RGD Symbol;Acc:1303020]	2.74194	2.3303	1.68547	1.0146	0.903928	1.33617	2.0763	1.05401	up
GO:0044344	cellular response to fibroblast growth factor stimulus	biological_process	8	0.220891	MSTRG.25662	Frs2	fibroblast growth factor receptor substrate 2 [Source:RGD Symbol;Acc:1308201]	1.85463	2.23289	2.7624	1.887	8.46212	8.22208	0.368846	-1.43891	down
GO:0030901	midbrain development	biological_process	5	0.220891	MSTRG.10688	Cma1	chymase 1 [Source:RGD Symbol;Acc:2365]	4.6429	2.56201	3.59294	1.91197	1.46093	1.90488	2.04591	1.03274	up
GO:2001240	negative regulation of extrinsic apoptotic signaling pathway in absence of ligand	biological_process	10	0.220891	MSTRG.17011	Hspa1b	heat shock protein family A (Hsp70) member 1B [Source:RGD Symbol;Acc:2840]	5.24329	5.52474	2.7742	7.21687	11.7813	14.7747	0.40098	-1.3184	down
GO:0003281	ventricular septum development	biological_process	6	0.226433	MSTRG.25662	Frs2	fibroblast growth factor receptor substrate 2 [Source:RGD Symbol;Acc:1308201]	1.85463	2.23289	2.7624	1.887	8.46212	8.22208	0.368846	-1.43891	down
GO:0072593	reactive oxygen species metabolic process	biological_process	5	0.226433	MSTRG.1268	Ccn2	cellular communication network factor 2 [Source:RGD Symbol;Acc:621392]	97.162	163.002	90.2827	62.7941	47.5404	55.8168	2.1092	1.0767	up
GO:0048008	platelet-derived growth factor receptor signaling pathway	biological_process	8	0.226433	ENSRNOG00000005964	Nr4a3	nuclear receptor subfamily 4, group A, member 3 [Source:RGD Symbol;Acc:61882]	0.829097	0.535612	0.350647	0.270902	0.310903	0.258833	2.04054	1.02895	up
GO:0032727	positive regulation of interferon-alpha production	biological_process	9	0.226433	MSTRG.3425	Irf7	interferon regulatory factor 7 [Source:RGD Symbol;Acc:1307828]	3.76225	5.28163	2.92289	1.06032	1.17443	1.60451	3.11694	1.64013	up
GO:0034260	negative regulation of GTPase activity	biological_process	8	0.226433	MSTRG.21375	Klrk1	killer cell lectin like receptor K1 [Source:RGD Symbol;Acc:3180]	3.23628	1.16965	1.88792	0.905104	0.662451	1.16837	2.30045	1.20191	up
GO:0031623	receptor internalization	biological_process	9	0.226433	ENSRNOG00000045816	Gria1	glutamate ionotropic receptor AMPA type subunit 1 [Source:RGD Symbol;Acc:621531]	0.153662	0.0781212	0.0762892	0.328888	0.272742	0.303107	0.34051	-1.55423	down
GO:0034612	response to tumor necrosis factor	biological_process	7	0.226433	MSTRG.7077	Adipoq	adiponectin, C1Q and collagen domain containing [Source:RGD Symbol;Acc:628748]	1.56388	0.891889	1.23395	0.20421	0.211193	0.290087	5.23001	2.38681	up
GO:0000186	activation of MAPKK activity	biological_process	13	0.226433	MSTRG.321	AABR07038029		1.34153	0.581293	1.06597	0.270944	0.433341	0.626478	2.24592	1.16731	up
GO:0007339	binding of sperm to zona pellucida	biological_process	7	0.226433	MSTRG.17011	Hspa1b	heat shock protein family A (Hsp70) member 1B [Source:RGD Symbol;Acc:2840]	5.24329	5.52474	2.7742	7.21687	11.7813	14.7747	0.40098	-1.3184	down
GO:0097718	disordered domain specific binding	molecular_function	6	0.226433	MSTRG.17011	Hspa1b	heat shock protein family A (Hsp70) member 1B [Source:RGD Symbol;Acc:2840]	5.24329	5.52474	2.7742	7.21687	11.7813	14.7747	0.40098	-1.3184	down
GO:0031333	negative regulation of protein-containing complex assembly	biological_process	7	0.231935	MSTRG.27342	Cryab	crystallin, alpha B [Source:RGD Symbol;Acc:2414]	4.40167	3.16475	1.93664	6.6383	11.8965	6.47058	0.380041	-1.39577	down
GO:0045787	positive regulation of cell cycle	biological_process	7	0.231935	ENSRNOG00000005964	Nr4a3	nuclear receptor subfamily 4, group A, member 3 [Source:RGD Symbol;Acc:61882]	0.829097	0.535612	0.350647	0.270902	0.310903	0.258833	2.04054	1.02895	up
GO:0050873	brown fat cell differentiation	biological_process	7	0.231935	MSTRG.7077	Adipoq	adiponectin, C1Q and collagen domain containing [Source:RGD Symbol;Acc:628748]	1.56388	0.891889	1.23395	0.20421	0.211193	0.290087	5.23001	2.38681	up
GO:0016575	histone deacetylation	biological_process	11	0.231935	MSTRG.752	Morf4l2	mortality factor 4 like 2 [Source:RGD Symbol;Acc:1359471]	68.6344	76.9306	75.8236	18.1591	17.1081	17.1627	4.22256	2.07812	up
GO:0007517	muscle organ development	biological_process	6	0.231935	MSTRG.27342	Cryab	crystallin, alpha B [Source:RGD Symbol;Acc:2414]	4.40167	3.16475	1.93664	6.6383	11.8965	6.47058	0.380041	-1.39577	down
GO:0008198	ferrous iron binding	molecular_function	9	0.231935	MSTRG.2963	AABR07005031		1.23131	1.57767	0.841578	3.18902	3.75164	4.00715	0.333451	-1.58445	down
GO:0071356	cellular response to tumor necrosis factor	biological_process	8	0.233132	ENSRNOG00000001926	Cldn1	claudin 1 [Source:RGD Symbol;Acc:68422]	0.488957	0.588734	0.237891	0.155539	0.268818	0.188699	2.14594	1.10161	up
GO:0071356	cellular response to tumor necrosis factor	biological_process	8	0.233132	MSTRG.26667	Gpd1	glycerol-3-phosphate dehydrogenase 1 [Source:RGD Symbol;Acc:621381]	2.5	0.764599	1.04927	0.560462	0.529418	0.458827	2.78547	1.47792	up
GO:0031012	extracellular matrix	cellular_component	4	0.233665	MSTRG.1268	Ccn2	cellular communication network factor 2 [Source:RGD Symbol;Acc:621392]	97.162	163.002	90.2827	62.7941	47.5404	55.8168	2.1092	1.0767	up
GO:0031012	extracellular matrix	cellular_component	4	0.233665	MSTRG.26806	Mmp10	matrix metallopeptidase 10 [Source:RGD Symbol;Acc:620192]	0.65082	0.677513	0.764298	0.351474	0.357167	0.30782	2.05874	1.04176	up
GO:0031012	extracellular matrix	cellular_component	4	0.233665	MSTRG.28103	Col6a5	collagen type VI alpha 5 chain [Source:RGD Symbol;Acc:1565804]	0.755555	1.13807	0.76111	2.0422	1.98002	1.51814	0.479162	-1.06141	down
GO:0005198	structural molecule activity	molecular_function	3	0.235752	ENSRNOG00000001926	Cldn1	claudin 1 [Source:RGD Symbol;Acc:68422]	0.488957	0.588734	0.237891	0.155539	0.268818	0.188699	2.14594	1.10161	up
GO:0005198	structural molecule activity	molecular_function	3	0.235752	MSTRG.27342	Cryab	crystallin, alpha B [Source:RGD Symbol;Acc:2414]	4.40167	3.16475	1.93664	6.6383	11.8965	6.47058	0.380041	-1.39577	down
GO:0001656	metanephros development	biological_process	7	0.237399	MSTRG.13078	Greb1l	GREB1 like retinoic acid receptor coactivator [Source:RGD Symbol;Acc:1562371]	0.243967	0.318463	0.335822	0.11646	0.127973	0.1975	2.03255	1.02329	up
GO:0040018	positive regulation of multicellular organism growth	biological_process	8	0.237399	ENSRNOG00000003972	Tshr	thyroid stimulating hormone receptor [Source:RGD Symbol;Acc:3911]	0.489374	0.184589	0.289544	0.094947	0.190353	0.167872	2.12614	1.08824	up
GO:0019838	growth factor binding	molecular_function	5	0.237399	MSTRG.29376	Igfbp2	insulin-like growth factor binding protein 2 [Source:RGD Symbol;Acc:2873]	0.073613	0.214964	0.510057	2.1311	1.26299	0.635682	0.198184	-2.33509	down
GO:0043407	negative regulation of MAP kinase activity	biological_process	12	0.237399	MSTRG.7077	Adipoq	adiponectin, C1Q and collagen domain containing [Source:RGD Symbol;Acc:628748]	1.56388	0.891889	1.23395	0.20421	0.211193	0.290087	5.23001	2.38681	up
GO:0046326	positive regulation of glucose import	biological_process	10	0.237399	MSTRG.7077	Adipoq	adiponectin, C1Q and collagen domain containing [Source:RGD Symbol;Acc:628748]	1.56388	0.891889	1.23395	0.20421	0.211193	0.290087	5.23001	2.38681	up
GO:0051898	negative regulation of protein kinase B signaling	biological_process	10	0.242823	MSTRG.7866	Rack1	receptor for activated C kinase 1 [Source:RGD Symbol;Acc:69229]	2.12116	1.74372	0.700888	3.26988	5.21372	1.65053	0.450533	-1.15029	down
GO:0043200	response to amino acid	biological_process	6	0.242823	MSTRG.1268	Ccn2	cellular communication network factor 2 [Source:RGD Symbol;Acc:621392]	97.162	163.002	90.2827	62.7941	47.5404	55.8168	2.1092	1.0767	up
GO:0010467	gene expression	biological_process	6	0.242823	MSTRG.7077	Adipoq	adiponectin, C1Q and collagen domain containing [Source:RGD Symbol;Acc:628748]	1.56388	0.891889	1.23395	0.20421	0.211193	0.290087	5.23001	2.38681	up
GO:0048565	digestive tract development	biological_process	6	0.242823	ENSRNOG00000019500	Cyp1a1	cytochrome P450, family 1, subfamily a, polypeptide 1 [Source:RGD Symbol;Acc:2458]	0.03592	0.0001	0.081544	0.280251	0.378238	0.727885	0.0847996	-3.5598	down
GO:0004879	nuclear receptor activity	molecular_function	6	0.242823	ENSRNOG00000005964	Nr4a3	nuclear receptor subfamily 4, group A, member 3 [Source:RGD Symbol;Acc:61882]	0.829097	0.535612	0.350647	0.270902	0.310903	0.258833	2.04054	1.02895	up
GO:0048545	response to steroid hormone	biological_process	6	0.242823	MSTRG.29376	Igfbp2	insulin-like growth factor binding protein 2 [Source:RGD Symbol;Acc:2873]	0.073613	0.214964	0.510057	2.1311	1.26299	0.635682	0.198184	-2.33509	down
GO:0042169	SH2 domain binding	molecular_function	6	0.242823	MSTRG.7866	Rack1	receptor for activated C kinase 1 [Source:RGD Symbol;Acc:69229]	2.12116	1.74372	0.700888	3.26988	5.21372	1.65053	0.450533	-1.15029	down
GO:0046677	response to antibiotic	biological_process	5	0.242823	ENSRNOG00000019500	Cyp1a1	cytochrome P450, family 1, subfamily a, polypeptide 1 [Source:RGD Symbol;Acc:2458]	0.03592	0.0001	0.081544	0.280251	0.378238	0.727885	0.0847996	-3.5598	down
GO:0006464	cellular protein modification process	biological_process	8	0.24821	MSTRG.2812	Lipt2	lipoyl(octanoyl) transferase 2 [Source:RGD Symbol;Acc:1305211]	0.283157	0.506009	0.480529	0.88151	1.24304	0.745033	0.442466	-1.17636	down
GO:0016616	oxidoreductase activity, acting on the CH-OH group of donors, NAD or NADP as acceptor	molecular_function	6	0.24821	MSTRG.26667	Gpd1	glycerol-3-phosphate dehydrogenase 1 [Source:RGD Symbol;Acc:621381]	2.5	0.764599	1.04927	0.560462	0.529418	0.458827	2.78547	1.47792	up
GO:0016712	oxidoreductase activity, acting on paired donors, with incorporation or reduction of molecular oxygen, reduced flavin or flavoprotein as one donor, and incorporation of one atom of oxygen	molecular_function	6	0.24821	ENSRNOG00000019500	Cyp1a1	cytochrome P450, family 1, subfamily a, polypeptide 1 [Source:RGD Symbol;Acc:2458]	0.03592	0.0001	0.081544	0.280251	0.378238	0.727885	0.0847996	-3.5598	down
GO:0006635	fatty acid beta-oxidation	biological_process	11	0.24821	MSTRG.7077	Adipoq	adiponectin, C1Q and collagen domain containing [Source:RGD Symbol;Acc:628748]	1.56388	0.891889	1.23395	0.20421	0.211193	0.290087	5.23001	2.38681	up
GO:0007616	long-term memory	biological_process	6	0.24821	ENSRNOG00000045816	Gria1	glutamate ionotropic receptor AMPA type subunit 1 [Source:RGD Symbol;Acc:621531]	0.153662	0.0781212	0.0762892	0.328888	0.272742	0.303107	0.34051	-1.55423	down
GO:0000723	telomere maintenance	biological_process	8	0.24821	MSTRG.17011	Hspa1b	heat shock protein family A (Hsp70) member 1B [Source:RGD Symbol;Acc:2840]	5.24329	5.52474	2.7742	7.21687	11.7813	14.7747	0.40098	-1.3184	down
GO:0043536	positive regulation of blood vessel endothelial cell migration	biological_process	11	0.24821	ENSRNOG00000005008	Angpt4	angiopoietin 4 [Source:RGD Symbol;Acc:1307539]	0.957383	0.605696	0.869505	0.442478	0.367232	0.262644	2.26845	1.18171	up
GO:0043204	perikaryon	cellular_component	5	0.248873	MSTRG.27342	Cryab	crystallin, alpha B [Source:RGD Symbol;Acc:2414]	4.40167	3.16475	1.93664	6.6383	11.8965	6.47058	0.380041	-1.39577	down
GO:0043204	perikaryon	cellular_component	5	0.248873	MSTRG.7866	Rack1	receptor for activated C kinase 1 [Source:RGD Symbol;Acc:69229]	2.12116	1.74372	0.700888	3.26988	5.21372	1.65053	0.450533	-1.15029	down
GO:0016459	myosin complex	cellular_component	4	0.253558	MSTRG.10649	Myh6	myosin heavy chain 7 [Source:RGD Symbol;Acc:62030];myosin heavy chain 6 [Source:RGD Symbol;Acc:62029]	0.997238	1.06135	0.328905	1.69535	2.31046	1.00868	0.476118	-1.07061	down
GO:0009966	regulation of signal transduction	biological_process	7	0.253558	ENSRNOG00000020872	Cd5	Cd5 molecule [Source:RGD Symbol;Acc:2309]	0.577905	0.540254	0.25983	0.0973373	0.177983	0.267674	2.53776	1.34356	up
GO:0030544	Hsp70 protein binding	molecular_function	6	0.253558	ENSRNOG00000019500	Cyp1a1	cytochrome P450, family 1, subfamily a, polypeptide 1 [Source:RGD Symbol;Acc:2458]	0.03592	0.0001	0.081544	0.280251	0.378238	0.727885	0.0847996	-3.5598	down
GO:0001707	mesoderm formation	biological_process	6	0.253558	ENSRNOG00000005964	Nr4a3	nuclear receptor subfamily 4, group A, member 3 [Source:RGD Symbol;Acc:61882]	0.829097	0.535612	0.350647	0.270902	0.310903	0.258833	2.04054	1.02895	up
GO:0008083	growth factor activity	molecular_function	7	0.256759	ENSRNOG00000053979	Egf	epidermal growth factor [Source:RGD Symbol;Acc:2542]	0.168282	0.113928	0.0974724	0.246911	0.315637	0.326161	0.427229	-1.22692	down
GO:0008083	growth factor activity	molecular_function	7	0.256759	MSTRG.1268	Ccn2	cellular communication network factor 2 [Source:RGD Symbol;Acc:621392]	97.162	163.002	90.2827	62.7941	47.5404	55.8168	2.1092	1.0767	up
GO:0005938	cell cortex	cellular_component	7	0.256759	ENSRNOG00000026764	Pla2g4c	phospholipase A2 group IVC [Source:RGD Symbol;Acc:1594658]	0.486308	0.281544	0.148092	0.0390525	0.0591423	0.217515	2.90122	1.53666	up
GO:0005938	cell cortex	cellular_component	7	0.256759	MSTRG.1268	Ccn2	cellular communication network factor 2 [Source:RGD Symbol;Acc:621392]	97.162	163.002	90.2827	62.7941	47.5404	55.8168	2.1092	1.0767	up
GO:0042493	response to drug	biological_process	5	0.257905	ENSRNOG00000019500	Cyp1a1	cytochrome P450, family 1, subfamily a, polypeptide 1 [Source:RGD Symbol;Acc:2458]	0.03592	0.0001	0.081544	0.280251	0.378238	0.727885	0.0847996	-3.5598	down
GO:0042493	response to drug	biological_process	5	0.257905	MSTRG.1247	RGD1559962	similar to High mobility group protein 2 (HMG-2) [Source:RGD Symbol;Acc:1559962]	2.0089	1.58098	1.57628	1.87562	4.21377	5.19355	0.457874	-1.12698	down
GO:0042493	response to drug	biological_process	5	0.257905	MSTRG.29376	Igfbp2	insulin-like growth factor binding protein 2 [Source:RGD Symbol;Acc:2873]	0.073613	0.214964	0.510057	2.1311	1.26299	0.635682	0.198184	-2.33509	down
GO:0042493	response to drug	biological_process	5	0.257905	MSTRG.7077	Adipoq	adiponectin, C1Q and collagen domain containing [Source:RGD Symbol;Acc:628748]	1.56388	0.891889	1.23395	0.20421	0.211193	0.290087	5.23001	2.38681	up
GO:0060078	regulation of postsynaptic membrane potential	biological_process	6	0.258869	ENSRNOG00000045816	Gria1	glutamate ionotropic receptor AMPA type subunit 1 [Source:RGD Symbol;Acc:621531]	0.153662	0.0781212	0.0762892	0.328888	0.272742	0.303107	0.34051	-1.55423	down
GO:0051879	Hsp90 protein binding	molecular_function	6	0.258869	ENSRNOG00000019500	Cyp1a1	cytochrome P450, family 1, subfamily a, polypeptide 1 [Source:RGD Symbol;Acc:2458]	0.03592	0.0001	0.081544	0.280251	0.378238	0.727885	0.0847996	-3.5598	down
GO:0071345	cellular response to cytokine stimulus	biological_process	7	0.258869	MSTRG.29050	Il18rap	interleukin 18 receptor accessory protein [Source:RGD Symbol;Acc:727867]	3.58786	2.45648	3.08283	1.61627	1.37962	1.35237	2.09904	1.06973	up
GO:0009314	response to radiation	biological_process	5	0.258869	MSTRG.17011	Hspa1b	heat shock protein family A (Hsp70) member 1B [Source:RGD Symbol;Acc:2840]	5.24329	5.52474	2.7742	7.21687	11.7813	14.7747	0.40098	-1.3184	down
GO:0050767	regulation of neurogenesis	biological_process	8	0.258869	MSTRG.1247	RGD1559962	similar to High mobility group protein 2 (HMG-2) [Source:RGD Symbol;Acc:1559962]	2.0089	1.58098	1.57628	1.87562	4.21377	5.19355	0.457874	-1.12698	down
GO:0045597	positive regulation of cell differentiation	biological_process	7	0.258869	MSTRG.1268	Ccn2	cellular communication network factor 2 [Source:RGD Symbol;Acc:621392]	97.162	163.002	90.2827	62.7941	47.5404	55.8168	2.1092	1.0767	up
GO:0045429	positive regulation of nitric oxide biosynthetic process	biological_process	9	0.258869	MSTRG.21375	Klrk1	killer cell lectin like receptor K1 [Source:RGD Symbol;Acc:3180]	3.23628	1.16965	1.88792	0.905104	0.662451	1.16837	2.30045	1.20191	up
GO:0016573	histone acetylation	biological_process	10	0.264142	MSTRG.752	Morf4l2	mortality factor 4 like 2 [Source:RGD Symbol;Acc:1359471]	68.6344	76.9306	75.8236	18.1591	17.1081	17.1627	4.22256	2.07812	up
GO:0043473	pigmentation	biological_process	3	0.264142	MSTRG.7866	Rack1	receptor for activated C kinase 1 [Source:RGD Symbol;Acc:69229]	2.12116	1.74372	0.700888	3.26988	5.21372	1.65053	0.450533	-1.15029	down
GO:0002062	chondrocyte differentiation	biological_process	6	0.264142	MSTRG.9802	Cytl1	cytokine like 1 [Source:RGD Symbol;Acc:1561846]	8.09952	20.2674	26.2093	6.62096	2.89882	3.34061	4.24375	2.08534	up
GO:0005801	cis-Golgi network	cellular_component	6	0.264142	MSTRG.1268	Ccn2	cellular communication network factor 2 [Source:RGD Symbol;Acc:621392]	97.162	163.002	90.2827	62.7941	47.5404	55.8168	2.1092	1.0767	up
GO:0051092	positive regulation of NF-kappaB transcription factor activity	biological_process	7	0.26728	MSTRG.17011	Hspa1b	heat shock protein family A (Hsp70) member 1B [Source:RGD Symbol;Acc:2840]	5.24329	5.52474	2.7742	7.21687	11.7813	14.7747	0.40098	-1.3184	down
GO:0051092	positive regulation of NF-kappaB transcription factor activity	biological_process	7	0.26728	MSTRG.29050	Il18rap	interleukin 18 receptor accessory protein [Source:RGD Symbol;Acc:727867]	3.58786	2.45648	3.08283	1.61627	1.37962	1.35237	2.09904	1.06973	up
GO:0007605	sensory perception of sound	biological_process	8	0.26728	MSTRG.11358	LOC690468	similar to 60S ribosomal protein L38 [Source:RGD Symbol;Acc:1596041]	8.73527	23.9417	6.2189	7.9823	2.56257	2.99969	2.8717	1.5219	up
GO:0007605	sensory perception of sound	biological_process	8	0.26728	MSTRG.16301	LOC685963	similar to 60S ribosomal protein L38 [Source:RGD Symbol;Acc:1587812]	9.62033	24.8426	7.96908	8.04825	3.22774	4.20371	2.74114	1.45478	up
GO:0032502	developmental process	biological_process	3	0.269378	ENSRNOG00000019500	Cyp1a1	cytochrome P450, family 1, subfamily a, polypeptide 1 [Source:RGD Symbol;Acc:2458]	0.03592	0.0001	0.081544	0.280251	0.378238	0.727885	0.0847996	-3.5598	down
GO:0016358	dendrite development	biological_process	8	0.269378	ENSRNOG00000008054	Igsf9	immunoglobulin superfamily, member 9 [Source:RGD Symbol;Acc:1304566]	0.292083	0.261639	0.287037	0.673067	0.658462	0.633483	0.427864	-1.22477	down
GO:0002181	cytoplasmic translation	biological_process	9	0.26991	MSTRG.11358	LOC690468	similar to 60S ribosomal protein L38 [Source:RGD Symbol;Acc:1596041]	8.73527	23.9417	6.2189	7.9823	2.56257	2.99969	2.8717	1.5219	up
GO:0002181	cytoplasmic translation	biological_process	9	0.26991	MSTRG.16301	LOC685963	similar to 60S ribosomal protein L38 [Source:RGD Symbol;Acc:1587812]	9.62033	24.8426	7.96908	8.04825	3.22774	4.20371	2.74114	1.45478	up
GO:0001658	branching involved in ureteric bud morphogenesis	biological_process	7	0.274577	MSTRG.13078	Greb1l	GREB1 like retinoic acid receptor coactivator [Source:RGD Symbol;Acc:1562371]	0.243967	0.318463	0.335822	0.11646	0.127973	0.1975	2.03255	1.02329	up
GO:0006342	chromatin silencing	biological_process	5	0.274577	MSTRG.752	Morf4l2	mortality factor 4 like 2 [Source:RGD Symbol;Acc:1359471]	68.6344	76.9306	75.8236	18.1591	17.1081	17.1627	4.22256	2.07812	up
GO:0043124	negative regulation of I-kappaB kinase/NF-kappaB signaling	biological_process	10	0.274577	MSTRG.7077	Adipoq	adiponectin, C1Q and collagen domain containing [Source:RGD Symbol;Acc:628748]	1.56388	0.891889	1.23395	0.20421	0.211193	0.290087	5.23001	2.38681	up
GO:0005778	peroxisomal membrane	cellular_component	8	0.279739	MSTRG.21596	Far2	fatty acyl CoA reductase 2 [Source:RGD Symbol;Acc:1565966]	4.70552	2.47182	3.21356	1.81247	1.36236	1.33524	2.30393	1.2041	up
GO:0097190	apoptotic signaling pathway	biological_process	5	0.279739	ENSRNOG00000020872	Cd5	Cd5 molecule [Source:RGD Symbol;Acc:2309]	0.577905	0.540254	0.25983	0.0973373	0.177983	0.267674	2.53776	1.34356	up
GO:0005544	calcium-dependent phospholipid binding	molecular_function	6	0.279739	ENSRNOG00000026764	Pla2g4c	phospholipase A2 group IVC [Source:RGD Symbol;Acc:1594658]	0.486308	0.281544	0.148092	0.0390525	0.0591423	0.217515	2.90122	1.53666	up
GO:0006694	steroid biosynthetic process	biological_process	7	0.284865	ENSRNOG00000019500	Cyp1a1	cytochrome P450, family 1, subfamily a, polypeptide 1 [Source:RGD Symbol;Acc:2458]	0.03592	0.0001	0.081544	0.280251	0.378238	0.727885	0.0847996	-3.5598	down
GO:0005044	scavenger receptor activity	molecular_function	4	0.284865	ENSRNOG00000020872	Cd5	Cd5 molecule [Source:RGD Symbol;Acc:2309]	0.577905	0.540254	0.25983	0.0973373	0.177983	0.267674	2.53776	1.34356	up
GO:0010595	positive regulation of endothelial cell migration	biological_process	10	0.284865	ENSRNOG00000005008	Angpt4	angiopoietin 4 [Source:RGD Symbol;Acc:1307539]	0.957383	0.605696	0.869505	0.442478	0.367232	0.262644	2.26845	1.18171	up
GO:0008301	DNA binding, bending	molecular_function	7	0.289954	MSTRG.1247	RGD1559962	similar to High mobility group protein 2 (HMG-2) [Source:RGD Symbol;Acc:1559962]	2.0089	1.58098	1.57628	1.87562	4.21377	5.19355	0.457874	-1.12698	down
GO:0005080	protein kinase C binding	molecular_function	8	0.289954	MSTRG.7866	Rack1	receptor for activated C kinase 1 [Source:RGD Symbol;Acc:69229]	2.12116	1.74372	0.700888	3.26988	5.21372	1.65053	0.450533	-1.15029	down
GO:0043588	skin development	biological_process	6	0.289954	ENSRNOG00000002053	Fras1	Fraser extracellular matrix complex subunit 1 [Source:RGD Symbol;Acc:1306516]	0.139257	0.067374	0.065133	0.196717	0.15547	0.194714	0.496916	-1.00893	down
GO:0120163	negative regulation of cold-induced thermogenesis	biological_process	7	0.289954	MSTRG.7077	Adipoq	adiponectin, C1Q and collagen domain containing [Source:RGD Symbol;Acc:628748]	1.56388	0.891889	1.23395	0.20421	0.211193	0.290087	5.23001	2.38681	up
GO:0007507	heart development	biological_process	6	0.290962	MSTRG.1771	Tnni3	dynein, axonemal, assembly factor 3 [Source:RGD Symbol;Acc:2323487];troponin I3, cardiac type [Source:RGD Symbol;Acc:62052]	0.232226	0.361112	0.142345	0.656005	0.490498	0.460709	0.457739	-1.1274	down
GO:0007507	heart development	biological_process	6	0.290962	MSTRG.23260	Hspb7	heat shock protein family B (small) member 7 [Source:RGD Symbol;Acc:62021]	2.46517	1.00351	0.914151	2.58052	4.33748	2.0995	0.486036	-1.04086	down
GO:0007507	heart development	biological_process	6	0.290962	MSTRG.2394	Csrp3	cysteine and glycine rich protein 3 [Source:RGD Symbol;Acc:71092]	0.636871	1.03978	0.697614	1.76671	2.35583	1.56165	0.417697	-1.25947	down
GO:0005581	collagen trimer	cellular_component	4	0.295008	MSTRG.7077	Adipoq	adiponectin, C1Q and collagen domain containing [Source:RGD Symbol;Acc:628748]	1.56388	0.891889	1.23395	0.20421	0.211193	0.290087	5.23001	2.38681	up
GO:0008286	insulin receptor signaling pathway	biological_process	8	0.295008	MSTRG.2394	Csrp3	cysteine and glycine rich protein 3 [Source:RGD Symbol;Acc:71092]	0.636871	1.03978	0.697614	1.76671	2.35583	1.56165	0.417697	-1.25947	down
GO:0051287	NAD binding	molecular_function	6	0.295008	MSTRG.26667	Gpd1	glycerol-3-phosphate dehydrogenase 1 [Source:RGD Symbol;Acc:621381]	2.5	0.764599	1.04927	0.560462	0.529418	0.458827	2.78547	1.47792	up
GO:0032720	negative regulation of tumor necrosis factor production	biological_process	9	0.295008	MSTRG.7077	Adipoq	adiponectin, C1Q and collagen domain containing [Source:RGD Symbol;Acc:628748]	1.56388	0.891889	1.23395	0.20421	0.211193	0.290087	5.23001	2.38681	up
GO:0045599	negative regulation of fat cell differentiation	biological_process	8	0.295008	MSTRG.7077	Adipoq	adiponectin, C1Q and collagen domain containing [Source:RGD Symbol;Acc:628748]	1.56388	0.891889	1.23395	0.20421	0.211193	0.290087	5.23001	2.38681	up
GO:0031334	positive regulation of protein-containing complex assembly	biological_process	7	0.295008	MSTRG.7866	Rack1	receptor for activated C kinase 1 [Source:RGD Symbol;Acc:69229]	2.12116	1.74372	0.700888	3.26988	5.21372	1.65053	0.450533	-1.15029	down
GO:0043197	dendritic spine	cellular_component	7	0.298807	ENSRNOG00000045816	Gria1	glutamate ionotropic receptor AMPA type subunit 1 [Source:RGD Symbol;Acc:621531]	0.153662	0.0781212	0.0762892	0.328888	0.272742	0.303107	0.34051	-1.55423	down
GO:0043197	dendritic spine	cellular_component	7	0.298807	MSTRG.27342	Cryab	crystallin, alpha B [Source:RGD Symbol;Acc:2414]	4.40167	3.16475	1.93664	6.6383	11.8965	6.47058	0.380041	-1.39577	down
GO:0043066	negative regulation of apoptotic process	biological_process	9	0.299146	ENSRNOG00000005008	Angpt4	angiopoietin 4 [Source:RGD Symbol;Acc:1307539]	0.957383	0.605696	0.869505	0.442478	0.367232	0.262644	2.26845	1.18171	up
GO:0043066	negative regulation of apoptotic process	biological_process	9	0.299146	ENSRNOG00000005964	Nr4a3	nuclear receptor subfamily 4, group A, member 3 [Source:RGD Symbol;Acc:61882]	0.829097	0.535612	0.350647	0.270902	0.310903	0.258833	2.04054	1.02895	up
GO:0043066	negative regulation of apoptotic process	biological_process	9	0.299146	MSTRG.17011	Hspa1b	heat shock protein family A (Hsp70) member 1B [Source:RGD Symbol;Acc:2840]	5.24329	5.52474	2.7742	7.21687	11.7813	14.7747	0.40098	-1.3184	down
GO:0043066	negative regulation of apoptotic process	biological_process	9	0.299146	MSTRG.27342	Cryab	crystallin, alpha B [Source:RGD Symbol;Acc:2414]	4.40167	3.16475	1.93664	6.6383	11.8965	6.47058	0.380041	-1.39577	down
GO:0043066	negative regulation of apoptotic process	biological_process	9	0.299146	MSTRG.4039	Ifit3	interferon-induced protein with tetratricopeptide repeats 3 [Source:RGD Symbol;Acc:1359681]	4.97721	3.52241	3.21606	1.3741	1.53573	2.40418	2.20468	1.14057	up
GO:0008217	regulation of blood pressure	biological_process	5	0.300025	MSTRG.10649	Myh6	myosin heavy chain 7 [Source:RGD Symbol;Acc:62030];myosin heavy chain 6 [Source:RGD Symbol;Acc:62029]	0.997238	1.06135	0.328905	1.69535	2.31046	1.00868	0.476118	-1.07061	down
GO:0001540	amyloid-beta binding	molecular_function	6	0.300025	MSTRG.27342	Cryab	crystallin, alpha B [Source:RGD Symbol;Acc:2414]	4.40167	3.16475	1.93664	6.6383	11.8965	6.47058	0.380041	-1.39577	down
GO:0046854	phosphatidylinositol phosphorylation	biological_process	10	0.300025	MSTRG.12982	AABR07028795		3.72587	3.84149	3.80138	1.79371	1.60476	1.97497	2.11573	1.08116	up
GO:0030178	negative regulation of Wnt signaling pathway	biological_process	9	0.300025	MSTRG.7866	Rack1	receptor for activated C kinase 1 [Source:RGD Symbol;Acc:69229]	2.12116	1.74372	0.700888	3.26988	5.21372	1.65053	0.450533	-1.15029	down
GO:0005261	cation channel activity	molecular_function	7	0.300025	ENSRNOG00000013053	Trpm6	transient receptor potential cation channel, subfamily M, member 6 [Source:RGD Symbol;Acc:1309942]	0.230886	0.220623	0.230274	0.013119	0.115142	0.093009	3.08123	1.6235	up
GO:0022625	cytosolic large ribosomal subunit	cellular_component	8	0.300639	MSTRG.11358	LOC690468	similar to 60S ribosomal protein L38 [Source:RGD Symbol;Acc:1596041]	8.73527	23.9417	6.2189	7.9823	2.56257	2.99969	2.8717	1.5219	up
GO:0022625	cytosolic large ribosomal subunit	cellular_component	8	0.300639	MSTRG.16301	LOC685963	similar to 60S ribosomal protein L38 [Source:RGD Symbol;Acc:1587812]	9.62033	24.8426	7.96908	8.04825	3.22774	4.20371	2.74114	1.45478	up
GO:0022625	cytosolic large ribosomal subunit	cellular_component	8	0.300639	MSTRG.9720	LOC100361259	60S ribosomal protein L13-like [Source:RGD Symbol;Acc:2320504]	0.491681	2.86215	2.46051	0.440434	0.334145	0.708102	3.92151	1.97141	up
GO:0003707	steroid hormone receptor activity	molecular_function	5	0.305008	ENSRNOG00000005964	Nr4a3	nuclear receptor subfamily 4, group A, member 3 [Source:RGD Symbol;Acc:61882]	0.829097	0.535612	0.350647	0.270902	0.310903	0.258833	2.04054	1.02895	up
GO:0010942	positive regulation of cell death	biological_process	7	0.305008	MSTRG.1268	Ccn2	cellular communication network factor 2 [Source:RGD Symbol;Acc:621392]	97.162	163.002	90.2827	62.7941	47.5404	55.8168	2.1092	1.0767	up
GO:0006629	lipid metabolic process	biological_process	5	0.308474	ENSRNOG00000015086	Plin1	perilipin 1 [Source:RGD Symbol;Acc:3351]	0.58075	0.293959	0.488433	0.106797	0.123819	0.12879	3.79277	1.92325	up
GO:0006629	lipid metabolic process	biological_process	5	0.308474	ENSRNOG00000019500	Cyp1a1	cytochrome P450, family 1, subfamily a, polypeptide 1 [Source:RGD Symbol;Acc:2458]	0.03592	0.0001	0.081544	0.280251	0.378238	0.727885	0.0847996	-3.5598	down
GO:0006629	lipid metabolic process	biological_process	5	0.308474	ENSRNOG00000026764	Pla2g4c	phospholipase A2 group IVC [Source:RGD Symbol;Acc:1594658]	0.486308	0.281544	0.148092	0.0390525	0.0591423	0.217515	2.90122	1.53666	up
GO:0006629	lipid metabolic process	biological_process	5	0.308474	MSTRG.21596	Far2	fatty acyl CoA reductase 2 [Source:RGD Symbol;Acc:1565966]	4.70552	2.47182	3.21356	1.81247	1.36236	1.33524	2.30393	1.2041	up
GO:0031397	negative regulation of protein ubiquitination	biological_process	11	0.309955	MSTRG.17011	Hspa1b	heat shock protein family A (Hsp70) member 1B [Source:RGD Symbol;Acc:2840]	5.24329	5.52474	2.7742	7.21687	11.7813	14.7747	0.40098	-1.3184	down
GO:0070098	chemokine-mediated signaling pathway	biological_process	7	0.314867	ENSRNOG00000006736	Ccr3	C-C motif chemokine receptor 3 [Source:RGD Symbol;Acc:620593]	0.539265	0.662872	0.240814	0.156602	0.179279	0.329123	2.16984	1.11759	up
GO:0042552	myelination	biological_process	6	0.314867	MSTRG.19016	Mal	mal, T-cell differentiation protein [Source:RGD Symbol;Acc:3037]	1.70514	1.76004	1.8063	0.88808	0.918323	0.823618	2.00435	1.00314	up
GO:0043005	neuron projection	cellular_component	5	0.319695	ENSRNOG00000000873	Brs3	bombesin receptor subtype 3 [Source:RGD Symbol;Acc:628645]	0.684856	0.476728	0.325205	0.138879	0.100965	0.373652	2.42347	1.27707	up
GO:0043005	neuron projection	cellular_component	5	0.319695	ENSRNOG00000008054	Igsf9	immunoglobulin superfamily, member 9 [Source:RGD Symbol;Acc:1304566]	0.292083	0.261639	0.287037	0.673067	0.658462	0.633483	0.427864	-1.22477	down
GO:0043005	neuron projection	cellular_component	5	0.319695	ENSRNOG00000045816	Gria1	glutamate ionotropic receptor AMPA type subunit 1 [Source:RGD Symbol;Acc:621531]	0.153662	0.0781212	0.0762892	0.328888	0.272742	0.303107	0.34051	-1.55423	down
GO:0043005	neuron projection	cellular_component	5	0.319695	MSTRG.7866	Rack1	receptor for activated C kinase 1 [Source:RGD Symbol;Acc:69229]	2.12116	1.74372	0.700888	3.26988	5.21372	1.65053	0.450533	-1.15029	down
GO:0008283	cell population proliferation	biological_process	3	0.31972	ENSRNOG00000019500	Cyp1a1	cytochrome P450, family 1, subfamily a, polypeptide 1 [Source:RGD Symbol;Acc:2458]	0.03592	0.0001	0.081544	0.280251	0.378238	0.727885	0.0847996	-3.5598	down
GO:0008283	cell population proliferation	biological_process	3	0.31972	MSTRG.29050	Il18rap	interleukin 18 receptor accessory protein [Source:RGD Symbol;Acc:727867]	3.58786	2.45648	3.08283	1.61627	1.37962	1.35237	2.09904	1.06973	up
GO:0009408	response to heat	biological_process	5	0.319744	MSTRG.17011	Hspa1b	heat shock protein family A (Hsp70) member 1B [Source:RGD Symbol;Acc:2840]	5.24329	5.52474	2.7742	7.21687	11.7813	14.7747	0.40098	-1.3184	down
GO:0030170	pyridoxal phosphate binding	molecular_function	6	0.319744	MSTRG.19371	Nfs1	NFS1 cysteine desulfurase [Source:RGD Symbol;Acc:620912]	3.63526	0.0001	3.65634	0.0001	0.0001	0.0001	24305.7	14.569	up
GO:0097421	liver regeneration	biological_process	8	0.319744	ENSRNOG00000001926	Cldn1	claudin 1 [Source:RGD Symbol;Acc:68422]	0.488957	0.588734	0.237891	0.155539	0.268818	0.188699	2.14594	1.10161	up
GO:0051496	positive regulation of stress fiber assembly	biological_process	8	0.319744	MSTRG.1268	Ccn2	cellular communication network factor 2 [Source:RGD Symbol;Acc:621392]	97.162	163.002	90.2827	62.7941	47.5404	55.8168	2.1092	1.0767	up
GO:0045089	positive regulation of innate immune response	biological_process	8	0.319744	MSTRG.1247	RGD1559962	similar to High mobility group protein 2 (HMG-2) [Source:RGD Symbol;Acc:1559962]	2.0089	1.58098	1.57628	1.87562	4.21377	5.19355	0.457874	-1.12698	down
GO:0071005	U2-type precatalytic spliceosome	cellular_component	8	0.319744	MSTRG.860	Rnf113a1	ring finger protein 113A1 [Source:RGD Symbol;Acc:1359693]	1.82938	1.04395	2.2839	0.897504	0.407751	0.592646	2.71734	1.44219	up
GO:0000082	G1/S transition of mitotic cell cycle	biological_process	7	0.319744	MSTRG.14618	Rhou	ras homolog family member U [Source:MGI Symbol;Acc:MGI:1916831]	2.42309	1.84505	2.54412	2.55395	2.5103	9.21669	0.477017	-1.06789	down
GO:0007519	skeletal muscle tissue development	biological_process	8	0.324587	ENSRNOG00000014815	Myoz2	myozenin 2 [Source:RGD Symbol;Acc:1307669]	0.089599	0.566478	0.085301	1.18754	1.33308	0.76693	0.225511	-2.14873	down
GO:0051536	iron-sulfur cluster binding	molecular_function	5	0.329396	MSTRG.19371	Nfs1	NFS1 cysteine desulfurase [Source:RGD Symbol;Acc:620912]	3.63526	0.0001	3.65634	0.0001	0.0001	0.0001	24305.7	14.569	up
GO:0043280	positive regulation of cysteine-type endopeptidase activity involved in apoptotic process	biological_process	10	0.33417	MSTRG.1268	Ccn2	cellular communication network factor 2 [Source:RGD Symbol;Acc:621392]	97.162	163.002	90.2827	62.7941	47.5404	55.8168	2.1092	1.0767	up
GO:0016485	protein processing	biological_process	8	0.33417	MSTRG.23275	Ddi2	DNA damage inducible 1 homolog 2 [Source:RGD Symbol;Acc:1311815]	10.1342	3.79607	10.2228	3.09844	3.26578	3.1576	2.5366	1.34289	up
GO:0050885	neuromuscular process controlling balance	biological_process	7	0.33417	ENSRNOG00000005964	Nr4a3	nuclear receptor subfamily 4, group A, member 3 [Source:RGD Symbol;Acc:61882]	0.829097	0.535612	0.350647	0.270902	0.310903	0.258833	2.04054	1.02895	up
GO:0031100	animal organ regeneration	biological_process	6	0.338911	ENSRNOG00000005964	Nr4a3	nuclear receptor subfamily 4, group A, member 3 [Source:RGD Symbol;Acc:61882]	0.829097	0.535612	0.350647	0.270902	0.310903	0.258833	2.04054	1.02895	up
GO:0019898	extrinsic component of membrane	cellular_component	4	0.338911	MSTRG.19016	Mal	mal, T-cell differentiation protein [Source:RGD Symbol;Acc:3037]	1.70514	1.76004	1.8063	0.88808	0.918323	0.823618	2.00435	1.00314	up
GO:0002931	response to ischemia	biological_process	5	0.338911	MSTRG.17011	Hspa1b	heat shock protein family A (Hsp70) member 1B [Source:RGD Symbol;Acc:2840]	5.24329	5.52474	2.7742	7.21687	11.7813	14.7747	0.40098	-1.3184	down
GO:0043022	ribosome binding	molecular_function	6	0.343618	MSTRG.7866	Rack1	receptor for activated C kinase 1 [Source:RGD Symbol;Acc:69229]	2.12116	1.74372	0.700888	3.26988	5.21372	1.65053	0.450533	-1.15029	down
GO:0004519	endonuclease activity	molecular_function	7	0.343618	MSTRG.10586	Rnase6	ribonuclease A family member k6 [Source:RGD Symbol;Acc:1303020]	2.74194	2.3303	1.68547	1.0146	0.903928	1.33617	2.0763	1.05401	up
GO:0034605	cellular response to heat	biological_process	6	0.343618	MSTRG.17011	Hspa1b	heat shock protein family A (Hsp70) member 1B [Source:RGD Symbol;Acc:2840]	5.24329	5.52474	2.7742	7.21687	11.7813	14.7747	0.40098	-1.3184	down
GO:0000502	proteasome complex	cellular_component	5	0.348292	MSTRG.7427	LOC100911238	proteasome maturation protein-like [Source:RGD Symbol;Acc:6494524]	1.59028	3.85381	0.293878	9.47432	3.8247	8.55791	0.262524	-1.92948	down
GO:0030183	B cell differentiation	biological_process	8	0.348292	ENSRNOG00000003972	Tshr	thyroid stimulating hormone receptor [Source:RGD Symbol;Acc:3911]	0.489374	0.184589	0.289544	0.094947	0.190353	0.167872	2.12614	1.08824	up
GO:0006879	cellular iron ion homeostasis	biological_process	12	0.348292	MSTRG.2963	AABR07005031		1.23131	1.57767	0.841578	3.18902	3.75164	4.00715	0.333451	-1.58445	down
GO:0042277	peptide binding	molecular_function	5	0.348292	MSTRG.10688	Cma1	chymase 1 [Source:RGD Symbol;Acc:2365]	4.6429	2.56201	3.59294	1.91197	1.46093	1.90488	2.04591	1.03274	up
GO:0031526	brush border membrane	cellular_component	6	0.348292	ENSRNOG00000013053	Trpm6	transient receptor potential cation channel, subfamily M, member 6 [Source:RGD Symbol;Acc:1309942]	0.230886	0.220623	0.230274	0.013119	0.115142	0.093009	3.08123	1.6235	up
GO:0090502	RNA phosphodiester bond hydrolysis, endonucleolytic	biological_process	10	0.348292	MSTRG.10586	Rnase6	ribonuclease A family member k6 [Source:RGD Symbol;Acc:1303020]	2.74194	2.3303	1.68547	1.0146	0.903928	1.33617	2.0763	1.05401	up
GO:0008344	adult locomotory behavior	biological_process	5	0.348292	ENSRNOG00000003972	Tshr	thyroid stimulating hormone receptor [Source:RGD Symbol;Acc:3911]	0.489374	0.184589	0.289544	0.094947	0.190353	0.167872	2.12614	1.08824	up
GO:0030326	embryonic limb morphogenesis	biological_process	7	0.352933	ENSRNOG00000002053	Fras1	Fraser extracellular matrix complex subunit 1 [Source:RGD Symbol;Acc:1306516]	0.139257	0.067374	0.065133	0.196717	0.15547	0.194714	0.496916	-1.00893	down
GO:0070830	bicellular tight junction assembly	biological_process	9	0.357542	ENSRNOG00000001926	Cldn1	claudin 1 [Source:RGD Symbol;Acc:68422]	0.488957	0.588734	0.237891	0.155539	0.268818	0.188699	2.14594	1.10161	up
GO:0045860	positive regulation of protein kinase activity	biological_process	11	0.357542	MSTRG.7077	Adipoq	adiponectin, C1Q and collagen domain containing [Source:RGD Symbol;Acc:628748]	1.56388	0.891889	1.23395	0.20421	0.211193	0.290087	5.23001	2.38681	up
GO:0008092	cytoskeletal protein binding	molecular_function	5	0.362117	MSTRG.27342	Cryab	crystallin, alpha B [Source:RGD Symbol;Acc:2414]	4.40167	3.16475	1.93664	6.6383	11.8965	6.47058	0.380041	-1.39577	down
GO:0032526	response to retinoic acid	biological_process	6	0.362117	MSTRG.29376	Igfbp2	insulin-like growth factor binding protein 2 [Source:RGD Symbol;Acc:2873]	0.073613	0.214964	0.510057	2.1311	1.26299	0.635682	0.198184	-2.33509	down
GO:0005776	autophagosome	cellular_component	7	0.362117	MSTRG.6522	LOC680121	similar to heat shock protein 8 [Source:RGD Symbol;Acc:1595502]	30.1405	38.296	22.6258	32.113	23.1973	149.677	0.444234	-1.17061	down
GO:0016328	lateral plasma membrane	cellular_component	5	0.362117	ENSRNOG00000001926	Cldn1	claudin 1 [Source:RGD Symbol;Acc:68422]	0.488957	0.588734	0.237891	0.155539	0.268818	0.188699	2.14594	1.10161	up
GO:0048306	calcium-dependent protein binding	molecular_function	5	0.362117	MSTRG.1771	Tnni3	dynein, axonemal, assembly factor 3 [Source:RGD Symbol;Acc:2323487];troponin I3, cardiac type [Source:RGD Symbol;Acc:62052]	0.232226	0.361112	0.142345	0.656005	0.490498	0.460709	0.457739	-1.1274	down
GO:0014070	response to organic cyclic compound	biological_process	6	0.366161	ENSRNOG00000019500	Cyp1a1	cytochrome P450, family 1, subfamily a, polypeptide 1 [Source:RGD Symbol;Acc:2458]	0.03592	0.0001	0.081544	0.280251	0.378238	0.727885	0.0847996	-3.5598	down
GO:0014070	response to organic cyclic compound	biological_process	6	0.366161	MSTRG.1268	Ccn2	cellular communication network factor 2 [Source:RGD Symbol;Acc:621392]	97.162	163.002	90.2827	62.7941	47.5404	55.8168	2.1092	1.0767	up
GO:0048661	positive regulation of smooth muscle cell proliferation	biological_process	8	0.366661	ENSRNOG00000005964	Nr4a3	nuclear receptor subfamily 4, group A, member 3 [Source:RGD Symbol;Acc:61882]	0.829097	0.535612	0.350647	0.270902	0.310903	0.258833	2.04054	1.02895	up
GO:0001570	vasculogenesis	biological_process	6	0.366661	MSTRG.1771	Tnni3	dynein, axonemal, assembly factor 3 [Source:RGD Symbol;Acc:2323487];troponin I3, cardiac type [Source:RGD Symbol;Acc:62052]	0.232226	0.361112	0.142345	0.656005	0.490498	0.460709	0.457739	-1.1274	down
GO:0030672	synaptic vesicle membrane	cellular_component	4	0.366661	ENSRNOG00000045816	Gria1	glutamate ionotropic receptor AMPA type subunit 1 [Source:RGD Symbol;Acc:621531]	0.153662	0.0781212	0.0762892	0.328888	0.272742	0.303107	0.34051	-1.55423	down
GO:0030512	negative regulation of transforming growth factor beta receptor signaling pathway	biological_process	10	0.371172	MSTRG.17011	Hspa1b	heat shock protein family A (Hsp70) member 1B [Source:RGD Symbol;Acc:2840]	5.24329	5.52474	2.7742	7.21687	11.7813	14.7747	0.40098	-1.3184	down
GO:0005216	ion channel activity	molecular_function	6	0.373792	ENSRNOG00000013053	Trpm6	transient receptor potential cation channel, subfamily M, member 6 [Source:RGD Symbol;Acc:1309942]	0.230886	0.220623	0.230274	0.013119	0.115142	0.093009	3.08123	1.6235	up
GO:0005216	ion channel activity	molecular_function	6	0.373792	ENSRNOG00000045816	Gria1	glutamate ionotropic receptor AMPA type subunit 1 [Source:RGD Symbol;Acc:621531]	0.153662	0.0781212	0.0762892	0.328888	0.272742	0.303107	0.34051	-1.55423	down
GO:0030425	dendrite	cellular_component	6	0.374484	ENSRNOG00000008054	Igsf9	immunoglobulin superfamily, member 9 [Source:RGD Symbol;Acc:1304566]	0.292083	0.261639	0.287037	0.673067	0.658462	0.633483	0.427864	-1.22477	down
GO:0030425	dendrite	cellular_component	6	0.374484	ENSRNOG00000045816	Gria1	glutamate ionotropic receptor AMPA type subunit 1 [Source:RGD Symbol;Acc:621531]	0.153662	0.0781212	0.0762892	0.328888	0.272742	0.303107	0.34051	-1.55423	down
GO:0030425	dendrite	cellular_component	6	0.374484	MSTRG.6522	LOC680121	similar to heat shock protein 8 [Source:RGD Symbol;Acc:1595502]	30.1405	38.296	22.6258	32.113	23.1973	149.677	0.444234	-1.17061	down
GO:0030425	dendrite	cellular_component	6	0.374484	MSTRG.7866	Rack1	receptor for activated C kinase 1 [Source:RGD Symbol;Acc:69229]	2.12116	1.74372	0.700888	3.26988	5.21372	1.65053	0.450533	-1.15029	down
GO:0014823	response to activity	biological_process	4	0.375651	MSTRG.7077	Adipoq	adiponectin, C1Q and collagen domain containing [Source:RGD Symbol;Acc:628748]	1.56388	0.891889	1.23395	0.20421	0.211193	0.290087	5.23001	2.38681	up
GO:0003779	actin binding	molecular_function	6	0.38009	ENSRNOG00000014815	Myoz2	myozenin 2 [Source:RGD Symbol;Acc:1307669]	0.089599	0.566478	0.085301	1.18754	1.33308	0.76693	0.225511	-2.14873	down
GO:0003779	actin binding	molecular_function	6	0.38009	MSTRG.10649	Myh6	myosin heavy chain 7 [Source:RGD Symbol;Acc:62030];myosin heavy chain 6 [Source:RGD Symbol;Acc:62029]	0.997238	1.06135	0.328905	1.69535	2.31046	1.00868	0.476118	-1.07061	down
GO:0003779	actin binding	molecular_function	6	0.38009	MSTRG.1771	Tnni3	dynein, axonemal, assembly factor 3 [Source:RGD Symbol;Acc:2323487];troponin I3, cardiac type [Source:RGD Symbol;Acc:62052]	0.232226	0.361112	0.142345	0.656005	0.490498	0.460709	0.457739	-1.1274	down
GO:0051865	protein autoubiquitination	biological_process	12	0.380098	MSTRG.4999	Trim17	tripartite motif-containing 17 [Source:RGD Symbol;Acc:69290]	0.158453	0.186512	0.244611	0.471663	0.441507	0.741154	0.356386	-1.48849	down
GO:0048839	inner ear development	biological_process	5	0.380098	MSTRG.9802	Cytl1	cytokine like 1 [Source:RGD Symbol;Acc:1561846]	8.09952	20.2674	26.2093	6.62096	2.89882	3.34061	4.24375	2.08534	up
GO:0043130	ubiquitin binding	molecular_function	6	0.380098	MSTRG.23275	Ddi2	DNA damage inducible 1 homolog 2 [Source:RGD Symbol;Acc:1311815]	10.1342	3.79607	10.2228	3.09844	3.26578	3.1576	2.5366	1.34289	up
GO:0003725	double-stranded RNA binding	molecular_function	7	0.384514	ENSRNOG00000049282	Oas2	2'-5' oligoadenylate synthetase 2 [Source:RGD Symbol;Acc:1359697]	1.13584	0.796252	0.431963	0.36197	0.392657	0.369048	2.10386	1.07304	up
GO:0006006	glucose metabolic process	biological_process	8	0.384514	MSTRG.7077	Adipoq	adiponectin, C1Q and collagen domain containing [Source:RGD Symbol;Acc:628748]	1.56388	0.891889	1.23395	0.20421	0.211193	0.290087	5.23001	2.38681	up
GO:0042472	inner ear morphogenesis	biological_process	6	0.384514	ENSRNOG00000005964	Nr4a3	nuclear receptor subfamily 4, group A, member 3 [Source:RGD Symbol;Acc:61882]	0.829097	0.535612	0.350647	0.270902	0.310903	0.258833	2.04054	1.02895	up
GO:0009611	response to wounding	biological_process	5	0.384514	ENSRNOG00000019500	Cyp1a1	cytochrome P450, family 1, subfamily a, polypeptide 1 [Source:RGD Symbol;Acc:2458]	0.03592	0.0001	0.081544	0.280251	0.378238	0.727885	0.0847996	-3.5598	down
GO:0001938	positive regulation of endothelial cell proliferation	biological_process	9	0.384514	ENSRNOG00000006736	Ccr3	C-C motif chemokine receptor 3 [Source:RGD Symbol;Acc:620593]	0.539265	0.662872	0.240814	0.156602	0.179279	0.329123	2.16984	1.11759	up
GO:0006897	endocytosis	biological_process	7	0.386428	ENSRNOG00000020872	Cd5	Cd5 molecule [Source:RGD Symbol;Acc:2309]	0.577905	0.540254	0.25983	0.0973373	0.177983	0.267674	2.53776	1.34356	up
GO:0006897	endocytosis	biological_process	7	0.386428	MSTRG.14618	Rhou	ras homolog family member U [Source:MGI Symbol;Acc:MGI:1916831]	2.42309	1.84505	2.54412	2.55395	2.5103	9.21669	0.477017	-1.06789	down
GO:0071363	cellular response to growth factor stimulus	biological_process	7	0.388899	MSTRG.7866	Rack1	receptor for activated C kinase 1 [Source:RGD Symbol;Acc:69229]	2.12116	1.74372	0.700888	3.26988	5.21372	1.65053	0.450533	-1.15029	down
GO:0071560	cellular response to transforming growth factor beta stimulus	biological_process	8	0.388899	ENSRNOG00000001926	Cldn1	claudin 1 [Source:RGD Symbol;Acc:68422]	0.488957	0.588734	0.237891	0.155539	0.268818	0.188699	2.14594	1.10161	up
GO:0050679	positive regulation of epithelial cell proliferation	biological_process	8	0.388899	ENSRNOG00000005964	Nr4a3	nuclear receptor subfamily 4, group A, member 3 [Source:RGD Symbol;Acc:61882]	0.829097	0.535612	0.350647	0.270902	0.310903	0.258833	2.04054	1.02895	up
GO:0051015	actin filament binding	molecular_function	7	0.391451	MSTRG.10649	Myh6	myosin heavy chain 7 [Source:RGD Symbol;Acc:62030];myosin heavy chain 6 [Source:RGD Symbol;Acc:62029]	0.997238	1.06135	0.328905	1.69535	2.31046	1.00868	0.476118	-1.07061	down
GO:0051015	actin filament binding	molecular_function	7	0.391451	MSTRG.1771	Tnni3	dynein, axonemal, assembly factor 3 [Source:RGD Symbol;Acc:2323487];troponin I3, cardiac type [Source:RGD Symbol;Acc:62052]	0.232226	0.361112	0.142345	0.656005	0.490498	0.460709	0.457739	-1.1274	down
GO:0001664	G protein-coupled receptor binding	molecular_function	6	0.393253	MSTRG.17011	Hspa1b	heat shock protein family A (Hsp70) member 1B [Source:RGD Symbol;Acc:2840]	5.24329	5.52474	2.7742	7.21687	11.7813	14.7747	0.40098	-1.3184	down
GO:0001725	stress fiber	cellular_component	7	0.397576	MSTRG.10649	Myh6	myosin heavy chain 7 [Source:RGD Symbol;Acc:62030];myosin heavy chain 6 [Source:RGD Symbol;Acc:62029]	0.997238	1.06135	0.328905	1.69535	2.31046	1.00868	0.476118	-1.07061	down
GO:0070301	cellular response to hydrogen peroxide	biological_process	8	0.401868	MSTRG.29050	Il18rap	interleukin 18 receptor accessory protein [Source:RGD Symbol;Acc:727867]	3.58786	2.45648	3.08283	1.61627	1.37962	1.35237	2.09904	1.06973	up
GO:0043195	terminal bouton	cellular_component	6	0.401868	MSTRG.6522	LOC680121	similar to heat shock protein 8 [Source:RGD Symbol;Acc:1595502]	30.1405	38.296	22.6258	32.113	23.1973	149.677	0.444234	-1.17061	down
GO:0071944	cell periphery	cellular_component	4	0.40613	MSTRG.7077	Adipoq	adiponectin, C1Q and collagen domain containing [Source:RGD Symbol;Acc:628748]	1.56388	0.891889	1.23395	0.20421	0.211193	0.290087	5.23001	2.38681	up
GO:0006812	cation transport	biological_process	7	0.40613	ENSRNOG00000013053	Trpm6	transient receptor potential cation channel, subfamily M, member 6 [Source:RGD Symbol;Acc:1309942]	0.230886	0.220623	0.230274	0.013119	0.115142	0.093009	3.08123	1.6235	up
GO:0016779	nucleotidyltransferase activity	molecular_function	6	0.40613	ENSRNOG00000049282	Oas2	2'-5' oligoadenylate synthetase 2 [Source:RGD Symbol;Acc:1359697]	1.13584	0.796252	0.431963	0.36197	0.392657	0.369048	2.10386	1.07304	up
GO:0032091	negative regulation of protein binding	biological_process	7	0.40613	MSTRG.7866	Rack1	receptor for activated C kinase 1 [Source:RGD Symbol;Acc:69229]	2.12116	1.74372	0.700888	3.26988	5.21372	1.65053	0.450533	-1.15029	down
GO:0032729	positive regulation of interferon-gamma production	biological_process	8	0.40613	MSTRG.21375	Klrk1	killer cell lectin like receptor K1 [Source:RGD Symbol;Acc:3180]	3.23628	1.16965	1.88792	0.905104	0.662451	1.16837	2.30045	1.20191	up
GO:0070373	negative regulation of ERK1 and ERK2 cascade	biological_process	12	0.40613	MSTRG.7077	Adipoq	adiponectin, C1Q and collagen domain containing [Source:RGD Symbol;Acc:628748]	1.56388	0.891889	1.23395	0.20421	0.211193	0.290087	5.23001	2.38681	up
GO:0048511	rhythmic process	biological_process	3	0.410362	MSTRG.7866	Rack1	receptor for activated C kinase 1 [Source:RGD Symbol;Acc:69229]	2.12116	1.74372	0.700888	3.26988	5.21372	1.65053	0.450533	-1.15029	down
GO:0003824	catalytic activity	molecular_function	3	0.411431	ENSRNOG00000019500	Cyp1a1	cytochrome P450, family 1, subfamily a, polypeptide 1 [Source:RGD Symbol;Acc:2458]	0.03592	0.0001	0.081544	0.280251	0.378238	0.727885	0.0847996	-3.5598	down
GO:0003824	catalytic activity	molecular_function	3	0.411431	MSTRG.16315	Hmgcs2	3-hydroxy-3-methylglutaryl-CoA synthase 2 [Source:RGD Symbol;Acc:2804]	0.615012	0.301299	0.622912	0.289258	0.233091	0.131719	2.35331	1.23469	up
GO:0003824	catalytic activity	molecular_function	3	0.411431	MSTRG.19371	Nfs1	NFS1 cysteine desulfurase [Source:RGD Symbol;Acc:620912]	3.63526	0.0001	3.65634	0.0001	0.0001	0.0001	24305.7	14.569	up
GO:0003824	catalytic activity	molecular_function	3	0.411431	MSTRG.25663	Lyc2	lysozyme C type 2 [Source:RGD Symbol;Acc:1593616]	41.8054	26.3828	18.9251	18.5648	14.441	7.07027	2.1737	1.12015	up
GO:0005911	cell-cell junction	cellular_component	4	0.416287	ENSRNOG00000001926	Cldn1	claudin 1 [Source:RGD Symbol;Acc:68422]	0.488957	0.588734	0.237891	0.155539	0.268818	0.188699	2.14594	1.10161	up
GO:0005911	cell-cell junction	cellular_component	4	0.416287	MSTRG.25662	Frs2	fibroblast growth factor receptor substrate 2 [Source:RGD Symbol;Acc:1308201]	1.85463	2.23289	2.7624	1.887	8.46212	8.22208	0.368846	-1.43891	down
GO:0060021	roof of mouth development	biological_process	5	0.418736	ENSRNOG00000002053	Fras1	Fraser extracellular matrix complex subunit 1 [Source:RGD Symbol;Acc:1306516]	0.139257	0.067374	0.065133	0.196717	0.15547	0.194714	0.496916	-1.00893	down
GO:0045444	fat cell differentiation	biological_process	6	0.418736	ENSRNOG00000005964	Nr4a3	nuclear receptor subfamily 4, group A, member 3 [Source:RGD Symbol;Acc:61882]	0.829097	0.535612	0.350647	0.270902	0.310903	0.258833	2.04054	1.02895	up
GO:0005262	calcium channel activity	molecular_function	8	0.418736	ENSRNOG00000013053	Trpm6	transient receptor potential cation channel, subfamily M, member 6 [Source:RGD Symbol;Acc:1309942]	0.230886	0.220623	0.230274	0.013119	0.115142	0.093009	3.08123	1.6235	up
GO:0031647	regulation of protein stability	biological_process	5	0.418736	MSTRG.23275	Ddi2	DNA damage inducible 1 homolog 2 [Source:RGD Symbol;Acc:1311815]	10.1342	3.79607	10.2228	3.09844	3.26578	3.1576	2.5366	1.34289	up
GO:0006919	activation of cysteine-type endopeptidase activity involved in apoptotic process	biological_process	11	0.422879	MSTRG.7866	Rack1	receptor for activated C kinase 1 [Source:RGD Symbol;Acc:69229]	2.12116	1.74372	0.700888	3.26988	5.21372	1.65053	0.450533	-1.15029	down
GO:0007368	determination of left/right symmetry	biological_process	7	0.422879	MSTRG.1771	Tnni3	dynein, axonemal, assembly factor 3 [Source:RGD Symbol;Acc:2323487];troponin I3, cardiac type [Source:RGD Symbol;Acc:62052]	0.232226	0.361112	0.142345	0.656005	0.490498	0.460709	0.457739	-1.1274	down
GO:0016798	hydrolase activity, acting on glycosyl bonds	molecular_function	5	0.422879	MSTRG.25663	Lyc2	lysozyme C type 2 [Source:RGD Symbol;Acc:1593616]	41.8054	26.3828	18.9251	18.5648	14.441	7.07027	2.1737	1.12015	up
GO:0030030	cell projection organization	biological_process	5	0.422879	MSTRG.1771	Tnni3	dynein, axonemal, assembly factor 3 [Source:RGD Symbol;Acc:2323487];troponin I3, cardiac type [Source:RGD Symbol;Acc:62052]	0.232226	0.361112	0.142345	0.656005	0.490498	0.460709	0.457739	-1.1274	down
GO:0031225	anchored component of membrane	cellular_component	5	0.422879	MSTRG.26142	Gpihbp1	glycosylphosphatidylinositol anchored high density lipoprotein binding protein 1 [Source:RGD Symbol;Acc:1564237]	2.63219	2.08795	1.30847	0.676363	0.879262	1.01499	2.3452	1.22971	up
GO:0065003	protein-containing complex assembly	biological_process	6	0.422879	MSTRG.9426	Jchain	joining chain of multimeric IgA and IgM [Source:RGD Symbol;Acc:1310155]	132.362	133.248	97.0823	41.2594	54.0119	70.3597	2.18976	1.13077	up
GO:0043627	response to estrogen	biological_process	4	0.426992	MSTRG.29376	Igfbp2	insulin-like growth factor binding protein 2 [Source:RGD Symbol;Acc:2873]	0.073613	0.214964	0.510057	2.1311	1.26299	0.635682	0.198184	-2.33509	down
GO:0005791	rough endoplasmic reticulum	cellular_component	7	0.426992	MSTRG.28226	AABR07071482		0.81612	0.929613	0.839154	2.29921	1.63257	2.67258	0.391391	-1.35332	down
GO:0007160	cell-matrix adhesion	biological_process	6	0.426992	MSTRG.1268	Ccn2	cellular communication network factor 2 [Source:RGD Symbol;Acc:621392]	97.162	163.002	90.2827	62.7941	47.5404	55.8168	2.1092	1.0767	up
GO:0001649	osteoblast differentiation	biological_process	6	0.431076	MSTRG.7866	Rack1	receptor for activated C kinase 1 [Source:RGD Symbol;Acc:69229]	2.12116	1.74372	0.700888	3.26988	5.21372	1.65053	0.450533	-1.15029	down
GO:0017148	negative regulation of translation	biological_process	10	0.435132	MSTRG.7866	Rack1	receptor for activated C kinase 1 [Source:RGD Symbol;Acc:69229]	2.12116	1.74372	0.700888	3.26988	5.21372	1.65053	0.450533	-1.15029	down
GO:0030414	peptidase inhibitor activity	molecular_function	6	0.439158	MSTRG.19523	Eppin	epididymal peptidase inhibitor [Source:RGD Symbol;Acc:1597722]	0.324507	0.145258	0.262712	0.463882	0.553782	0.5654	0.462696	-1.11186	down
GO:0021766	hippocampus development	biological_process	5	0.439158	ENSRNOG00000005964	Nr4a3	nuclear receptor subfamily 4, group A, member 3 [Source:RGD Symbol;Acc:61882]	0.829097	0.535612	0.350647	0.270902	0.310903	0.258833	2.04054	1.02895	up
GO:0050727	regulation of inflammatory response	biological_process	8	0.439158	MSTRG.10688	Cma1	chymase 1 [Source:RGD Symbol;Acc:2365]	4.6429	2.56201	3.59294	1.91197	1.46093	1.90488	2.04591	1.03274	up
GO:0048471	perinuclear region of cytoplasm	cellular_component	6	0.442333	ENSRNOG00000049282	Oas2	2'-5' oligoadenylate synthetase 2 [Source:RGD Symbol;Acc:1359697]	1.13584	0.796252	0.431963	0.36197	0.392657	0.369048	2.10386	1.07304	up
GO:0048471	perinuclear region of cytoplasm	cellular_component	6	0.442333	MSTRG.1268	Ccn2	cellular communication network factor 2 [Source:RGD Symbol;Acc:621392]	97.162	163.002	90.2827	62.7941	47.5404	55.8168	2.1092	1.0767	up
GO:0048471	perinuclear region of cytoplasm	cellular_component	6	0.442333	MSTRG.17011	Hspa1b	heat shock protein family A (Hsp70) member 1B [Source:RGD Symbol;Acc:2840]	5.24329	5.52474	2.7742	7.21687	11.7813	14.7747	0.40098	-1.3184	down
GO:0048471	perinuclear region of cytoplasm	cellular_component	6	0.442333	MSTRG.7077	Adipoq	adiponectin, C1Q and collagen domain containing [Source:RGD Symbol;Acc:628748]	1.56388	0.891889	1.23395	0.20421	0.211193	0.290087	5.23001	2.38681	up
GO:0048471	perinuclear region of cytoplasm	cellular_component	6	0.442333	MSTRG.7866	Rack1	receptor for activated C kinase 1 [Source:RGD Symbol;Acc:69229]	2.12116	1.74372	0.700888	3.26988	5.21372	1.65053	0.450533	-1.15029	down
GO:0042632	cholesterol homeostasis	biological_process	9	0.443156	MSTRG.26142	Gpihbp1	glycosylphosphatidylinositol anchored high density lipoprotein binding protein 1 [Source:RGD Symbol;Acc:1564237]	2.63219	2.08795	1.30847	0.676363	0.879262	1.01499	2.3452	1.22971	up
GO:0008202	steroid metabolic process	biological_process	6	0.447126	ENSRNOG00000019500	Cyp1a1	cytochrome P450, family 1, subfamily a, polypeptide 1 [Source:RGD Symbol;Acc:2458]	0.03592	0.0001	0.081544	0.280251	0.378238	0.727885	0.0847996	-3.5598	down
GO:0071407	cellular response to organic cyclic compound	biological_process	7	0.447126	ENSRNOG00000019500	Cyp1a1	cytochrome P450, family 1, subfamily a, polypeptide 1 [Source:RGD Symbol;Acc:2458]	0.03592	0.0001	0.081544	0.280251	0.378238	0.727885	0.0847996	-3.5598	down
GO:0010466	negative regulation of peptidase activity	biological_process	10	0.447126	MSTRG.19523	Eppin	epididymal peptidase inhibitor [Source:RGD Symbol;Acc:1597722]	0.324507	0.145258	0.262712	0.463882	0.553782	0.5654	0.462696	-1.11186	down
GO:0015629	actin cytoskeleton	cellular_component	7	0.450186	ENSRNOG00000014815	Myoz2	myozenin 2 [Source:RGD Symbol;Acc:1307669]	0.089599	0.566478	0.085301	1.18754	1.33308	0.76693	0.225511	-2.14873	down
GO:0015629	actin cytoskeleton	cellular_component	7	0.450186	MSTRG.23260	Hspb7	heat shock protein family B (small) member 7 [Source:RGD Symbol;Acc:62021]	2.46517	1.00351	0.914151	2.58052	4.33748	2.0995	0.486036	-1.04086	down
GO:0004518	nuclease activity	molecular_function	6	0.451068	MSTRG.10586	Rnase6	ribonuclease A family member k6 [Source:RGD Symbol;Acc:1303020]	2.74194	2.3303	1.68547	1.0146	0.903928	1.33617	2.0763	1.05401	up
GO:0031090	organelle membrane	cellular_component	4	0.451068	ENSRNOG00000019500	Cyp1a1	cytochrome P450, family 1, subfamily a, polypeptide 1 [Source:RGD Symbol;Acc:2458]	0.03592	0.0001	0.081544	0.280251	0.378238	0.727885	0.0847996	-3.5598	down
GO:0005811	lipid droplet	cellular_component	6	0.451068	ENSRNOG00000015086	Plin1	perilipin 1 [Source:RGD Symbol;Acc:3351]	0.58075	0.293959	0.488433	0.106797	0.123819	0.12879	3.79277	1.92325	up
GO:0046330	positive regulation of JNK cascade	biological_process	13	0.451068	MSTRG.1268	Ccn2	cellular communication network factor 2 [Source:RGD Symbol;Acc:621392]	97.162	163.002	90.2827	62.7941	47.5404	55.8168	2.1092	1.0767	up
GO:0016525	negative regulation of angiogenesis	biological_process	8	0.454982	ENSRNOG00000005008	Angpt4	angiopoietin 4 [Source:RGD Symbol;Acc:1307539]	0.957383	0.605696	0.869505	0.442478	0.367232	0.262644	2.26845	1.18171	up
GO:0061844	antimicrobial humoral immune response mediated by antimicrobial peptide	biological_process	7	0.454982	MSTRG.10586	Rnase6	ribonuclease A family member k6 [Source:RGD Symbol;Acc:1303020]	2.74194	2.3303	1.68547	1.0146	0.903928	1.33617	2.0763	1.05401	up
GO:0000165	MAPK cascade	biological_process	11	0.458868	MSTRG.321	AABR07038029		1.34153	0.581293	1.06597	0.270944	0.433341	0.626478	2.24592	1.16731	up
GO:0006310	DNA recombination	biological_process	8	0.462726	MSTRG.1247	RGD1559962	similar to High mobility group protein 2 (HMG-2) [Source:RGD Symbol;Acc:1559962]	2.0089	1.58098	1.57628	1.87562	4.21377	5.19355	0.457874	-1.12698	down
GO:0030900	forebrain development	biological_process	5	0.462726	MSTRG.25662	Frs2	fibroblast growth factor receptor substrate 2 [Source:RGD Symbol;Acc:1308201]	1.85463	2.23289	2.7624	1.887	8.46212	8.22208	0.368846	-1.43891	down
GO:0030334	regulation of cell migration	biological_process	7	0.462726	MSTRG.26806	Mmp10	matrix metallopeptidase 10 [Source:RGD Symbol;Acc:620192]	0.65082	0.677513	0.764298	0.351474	0.357167	0.30782	2.05874	1.04176	up
GO:0030424	axon	cellular_component	6	0.464928	ENSRNOG00000008054	Igsf9	immunoglobulin superfamily, member 9 [Source:RGD Symbol;Acc:1304566]	0.292083	0.261639	0.287037	0.673067	0.658462	0.633483	0.427864	-1.22477	down
GO:0030424	axon	cellular_component	6	0.464928	MSTRG.27342	Cryab	crystallin, alpha B [Source:RGD Symbol;Acc:2414]	4.40167	3.16475	1.93664	6.6383	11.8965	6.47058	0.380041	-1.39577	down
GO:0030424	axon	cellular_component	6	0.464928	MSTRG.6522	LOC680121	similar to heat shock protein 8 [Source:RGD Symbol;Acc:1595502]	30.1405	38.296	22.6258	32.113	23.1973	149.677	0.444234	-1.17061	down
GO:0016192	vesicle-mediated transport	biological_process	6	0.46672	MSTRG.17011	Hspa1b	heat shock protein family A (Hsp70) member 1B [Source:RGD Symbol;Acc:2840]	5.24329	5.52474	2.7742	7.21687	11.7813	14.7747	0.40098	-1.3184	down
GO:0016192	vesicle-mediated transport	biological_process	6	0.46672	MSTRG.6522	LOC680121	similar to heat shock protein 8 [Source:RGD Symbol;Acc:1595502]	30.1405	38.296	22.6258	32.113	23.1973	149.677	0.444234	-1.17061	down
GO:0045121	membrane raft	cellular_component	6	0.46672	MSTRG.17011	Hspa1b	heat shock protein family A (Hsp70) member 1B [Source:RGD Symbol;Acc:2840]	5.24329	5.52474	2.7742	7.21687	11.7813	14.7747	0.40098	-1.3184	down
GO:0045121	membrane raft	cellular_component	6	0.46672	MSTRG.19016	Mal	mal, T-cell differentiation protein [Source:RGD Symbol;Acc:3037]	1.70514	1.76004	1.8063	0.88808	0.918323	0.823618	2.00435	1.00314	up
GO:0007229	integrin-mediated signaling pathway	biological_process	6	0.481613	MSTRG.1268	Ccn2	cellular communication network factor 2 [Source:RGD Symbol;Acc:621392]	97.162	163.002	90.2827	62.7941	47.5404	55.8168	2.1092	1.0767	up
GO:0000187	activation of MAPK activity	biological_process	13	0.481613	MSTRG.25662	Frs2	fibroblast growth factor receptor substrate 2 [Source:RGD Symbol;Acc:1308201]	1.85463	2.23289	2.7624	1.887	8.46212	8.22208	0.368846	-1.43891	down
GO:0038023	signaling receptor activity	molecular_function	4	0.485254	ENSRNOG00000045816	Gria1	glutamate ionotropic receptor AMPA type subunit 1 [Source:RGD Symbol;Acc:621531]	0.153662	0.0781212	0.0762892	0.328888	0.272742	0.303107	0.34051	-1.55423	down
GO:0038023	signaling receptor activity	molecular_function	4	0.485254	MSTRG.21375	Klrk1	killer cell lectin like receptor K1 [Source:RGD Symbol;Acc:3180]	3.23628	1.16965	1.88792	0.905104	0.662451	1.16837	2.30045	1.20191	up
GO:0030335	positive regulation of cell migration	biological_process	8	0.485254	ENSRNOG00000001926	Cldn1	claudin 1 [Source:RGD Symbol;Acc:68422]	0.488957	0.588734	0.237891	0.155539	0.268818	0.188699	2.14594	1.10161	up
GO:0030335	positive regulation of cell migration	biological_process	8	0.485254	MSTRG.7866	Rack1	receptor for activated C kinase 1 [Source:RGD Symbol;Acc:69229]	2.12116	1.74372	0.700888	3.26988	5.21372	1.65053	0.450533	-1.15029	down
GO:0005604	basement membrane	cellular_component	6	0.488981	ENSRNOG00000002053	Fras1	Fraser extracellular matrix complex subunit 1 [Source:RGD Symbol;Acc:1306516]	0.139257	0.067374	0.065133	0.196717	0.15547	0.194714	0.496916	-1.00893	down
GO:0007623	circadian rhythm	biological_process	4	0.496246	MSTRG.7077	Adipoq	adiponectin, C1Q and collagen domain containing [Source:RGD Symbol;Acc:628748]	1.56388	0.891889	1.23395	0.20421	0.211193	0.290087	5.23001	2.38681	up
GO:0019903	protein phosphatase binding	molecular_function	7	0.496246	MSTRG.7866	Rack1	receptor for activated C kinase 1 [Source:RGD Symbol;Acc:69229]	2.12116	1.74372	0.700888	3.26988	5.21372	1.65053	0.450533	-1.15029	down
GO:0006935	chemotaxis	biological_process	5	0.496246	ENSRNOG00000006736	Ccr3	C-C motif chemokine receptor 3 [Source:RGD Symbol;Acc:620593]	0.539265	0.662872	0.240814	0.156602	0.179279	0.329123	2.16984	1.11759	up
GO:0071346	cellular response to interferon-gamma	biological_process	8	0.496246	ENSRNOG00000001926	Cldn1	claudin 1 [Source:RGD Symbol;Acc:68422]	0.488957	0.588734	0.237891	0.155539	0.268818	0.188699	2.14594	1.10161	up
GO:0019900	kinase binding	molecular_function	6	0.49984	MSTRG.21375	Klrk1	killer cell lectin like receptor K1 [Source:RGD Symbol;Acc:3180]	3.23628	1.16965	1.88792	0.905104	0.662451	1.16837	2.30045	1.20191	up
GO:0007189	adenylate cyclase-activating G protein-coupled receptor signaling pathway	biological_process	8	0.49984	ENSRNOG00000003972	Tshr	thyroid stimulating hormone receptor [Source:RGD Symbol;Acc:3911]	0.489374	0.184589	0.289544	0.094947	0.190353	0.167872	2.12614	1.08824	up
GO:0007169	transmembrane receptor protein tyrosine kinase signaling pathway	biological_process	7	0.49984	MSTRG.25662	Frs2	fibroblast growth factor receptor substrate 2 [Source:RGD Symbol;Acc:1308201]	1.85463	2.23289	2.7624	1.887	8.46212	8.22208	0.368846	-1.43891	down
GO:0007219	Notch signaling pathway	biological_process	6	0.49984	ENSRNOG00000005008	Angpt4	angiopoietin 4 [Source:RGD Symbol;Acc:1307539]	0.957383	0.605696	0.869505	0.442478	0.367232	0.262644	2.26845	1.18171	up
GO:0016477	cell migration	biological_process	6	0.501144	MSTRG.1268	Ccn2	cellular communication network factor 2 [Source:RGD Symbol;Acc:621392]	97.162	163.002	90.2827	62.7941	47.5404	55.8168	2.1092	1.0767	up
GO:0016477	cell migration	biological_process	6	0.501144	MSTRG.14618	Rhou	ras homolog family member U [Source:MGI Symbol;Acc:MGI:1916831]	2.42309	1.84505	2.54412	2.55395	2.5103	9.21669	0.477017	-1.06789	down
GO:0050728	negative regulation of inflammatory response	biological_process	9	0.503408	MSTRG.7077	Adipoq	adiponectin, C1Q and collagen domain containing [Source:RGD Symbol;Acc:628748]	1.56388	0.891889	1.23395	0.20421	0.211193	0.290087	5.23001	2.38681	up
GO:0001889	liver development	biological_process	7	0.506951	ENSRNOG00000019500	Cyp1a1	cytochrome P450, family 1, subfamily a, polypeptide 1 [Source:RGD Symbol;Acc:2458]	0.03592	0.0001	0.081544	0.280251	0.378238	0.727885	0.0847996	-3.5598	down
GO:0007264	small GTPase mediated signal transduction	biological_process	6	0.506951	MSTRG.14618	Rhou	ras homolog family member U [Source:MGI Symbol;Acc:MGI:1916831]	2.42309	1.84505	2.54412	2.55395	2.5103	9.21669	0.477017	-1.06789	down
GO:0019899	enzyme binding	molecular_function	5	0.511645	ENSRNOG00000019500	Cyp1a1	cytochrome P450, family 1, subfamily a, polypeptide 1 [Source:RGD Symbol;Acc:2458]	0.03592	0.0001	0.081544	0.280251	0.378238	0.727885	0.0847996	-3.5598	down
GO:0019899	enzyme binding	molecular_function	5	0.511645	MSTRG.17011	Hspa1b	heat shock protein family A (Hsp70) member 1B [Source:RGD Symbol;Acc:2840]	5.24329	5.52474	2.7742	7.21687	11.7813	14.7747	0.40098	-1.3184	down
GO:0019899	enzyme binding	molecular_function	5	0.511645	MSTRG.7866	Rack1	receptor for activated C kinase 1 [Source:RGD Symbol;Acc:69229]	2.12116	1.74372	0.700888	3.26988	5.21372	1.65053	0.450533	-1.15029	down
GO:0016705	oxidoreductase activity, acting on paired donors, with incorporation or reduction of molecular oxygen	molecular_function	5	0.513962	ENSRNOG00000019500	Cyp1a1	cytochrome P450, family 1, subfamily a, polypeptide 1 [Source:RGD Symbol;Acc:2458]	0.03592	0.0001	0.081544	0.280251	0.378238	0.727885	0.0847996	-3.5598	down
GO:0045666	positive regulation of neuron differentiation	biological_process	10	0.513962	MSTRG.17011	Hspa1b	heat shock protein family A (Hsp70) member 1B [Source:RGD Symbol;Acc:2840]	5.24329	5.52474	2.7742	7.21687	11.7813	14.7747	0.40098	-1.3184	down
GO:0007565	female pregnancy	biological_process	5	0.520874	MSTRG.29376	Igfbp2	insulin-like growth factor binding protein 2 [Source:RGD Symbol;Acc:2873]	0.073613	0.214964	0.510057	2.1311	1.26299	0.635682	0.198184	-2.33509	down
GO:0001669	acrosomal vesicle	cellular_component	9	0.524293	MSTRG.19523	Eppin	epididymal peptidase inhibitor [Source:RGD Symbol;Acc:1597722]	0.324507	0.145258	0.262712	0.463882	0.553782	0.5654	0.462696	-1.11186	down
GO:0006281	DNA repair	biological_process	8	0.534123	MSTRG.17011	Hspa1b	heat shock protein family A (Hsp70) member 1B [Source:RGD Symbol;Acc:2840]	5.24329	5.52474	2.7742	7.21687	11.7813	14.7747	0.40098	-1.3184	down
GO:0006281	DNA repair	biological_process	8	0.534123	MSTRG.752	Morf4l2	mortality factor 4 like 2 [Source:RGD Symbol;Acc:1359471]	68.6344	76.9306	75.8236	18.1591	17.1081	17.1627	4.22256	2.07812	up
GO:0042802	identical protein binding	molecular_function	5	0.535307	ENSRNOG00000001926	Cldn1	claudin 1 [Source:RGD Symbol;Acc:68422]	0.488957	0.588734	0.237891	0.155539	0.268818	0.188699	2.14594	1.10161	up
GO:0042802	identical protein binding	molecular_function	5	0.535307	ENSRNOG00000032994	Myom3	myomesin 3 [Source:RGD Symbol;Acc:1310060]	0.440899	0.27448	0.374804	1.15099	1.0828	0.623768	0.381508	-1.39021	down
GO:0042802	identical protein binding	molecular_function	5	0.535307	MSTRG.21375	Klrk1	killer cell lectin like receptor K1 [Source:RGD Symbol;Acc:3180]	3.23628	1.16965	1.88792	0.905104	0.662451	1.16837	2.30045	1.20191	up
GO:0042802	identical protein binding	molecular_function	5	0.535307	MSTRG.23275	Ddi2	DNA damage inducible 1 homolog 2 [Source:RGD Symbol;Acc:1311815]	10.1342	3.79607	10.2228	3.09844	3.26578	3.1576	2.5366	1.34289	up
GO:0042802	identical protein binding	molecular_function	5	0.535307	MSTRG.23343	Angptl7	angiopoietin like 7 [Source:RGD Symbol;Acc:7553363]	7.81835	7.9259	4.33571	2.35398	2.94155	2.14646	2.6982	1.432	up
GO:0042802	identical protein binding	molecular_function	5	0.535307	MSTRG.2394	Csrp3	cysteine and glycine rich protein 3 [Source:RGD Symbol;Acc:71092]	0.636871	1.03978	0.697614	1.76671	2.35583	1.56165	0.417697	-1.25947	down
GO:0042802	identical protein binding	molecular_function	5	0.535307	MSTRG.27243	Cd3g	CD3g molecule [Source:RGD Symbol;Acc:1307718]	3.1597	3.36923	1.43494	0.802837	0.611571	1.27998	2.95572	1.56351	up
GO:0042802	identical protein binding	molecular_function	5	0.535307	MSTRG.27342	Cryab	crystallin, alpha B [Source:RGD Symbol;Acc:2414]	4.40167	3.16475	1.93664	6.6383	11.8965	6.47058	0.380041	-1.39577	down
GO:0042802	identical protein binding	molecular_function	5	0.535307	MSTRG.4039	Ifit3	interferon-induced protein with tetratricopeptide repeats 3 [Source:RGD Symbol;Acc:1359681]	4.97721	3.52241	3.21606	1.3741	1.53573	2.40418	2.20468	1.14057	up
GO:0042802	identical protein binding	molecular_function	5	0.535307	MSTRG.7077	Adipoq	adiponectin, C1Q and collagen domain containing [Source:RGD Symbol;Acc:628748]	1.56388	0.891889	1.23395	0.20421	0.211193	0.290087	5.23001	2.38681	up
GO:0042802	identical protein binding	molecular_function	5	0.535307	MSTRG.8909	Slamf7	SLAM family member 7 [Source:RGD Symbol;Acc:1560190]	2.04248	2.26062	1.47931	0.51249	0.624687	1.37511	2.30165	1.20267	up
GO:0002020	protease binding	molecular_function	6	0.53773	MSTRG.17011	Hspa1b	heat shock protein family A (Hsp70) member 1B [Source:RGD Symbol;Acc:2840]	5.24329	5.52474	2.7742	7.21687	11.7813	14.7747	0.40098	-1.3184	down
GO:0005576	extracellular region	cellular_component	3	0.540746	ENSRNOG00000001739	Meltf	melanotransferrin [Source:RGD Symbol;Acc:1308155]	0.547705	1.43145	0.847265	0.639556	0.295855	0.228587	2.4282	1.27989	up
GO:0005576	extracellular region	cellular_component	3	0.540746	MSTRG.10688	Cma1	chymase 1 [Source:RGD Symbol;Acc:2365]	4.6429	2.56201	3.59294	1.91197	1.46093	1.90488	2.04591	1.03274	up
GO:0005576	extracellular region	cellular_component	3	0.540746	MSTRG.1268	Ccn2	cellular communication network factor 2 [Source:RGD Symbol;Acc:621392]	97.162	163.002	90.2827	62.7941	47.5404	55.8168	2.1092	1.0767	up
GO:0005576	extracellular region	cellular_component	3	0.540746	MSTRG.19523	Eppin	epididymal peptidase inhibitor [Source:RGD Symbol;Acc:1597722]	0.324507	0.145258	0.262712	0.463882	0.553782	0.5654	0.462696	-1.11186	down
GO:0005576	extracellular region	cellular_component	3	0.540746	MSTRG.22340	Orm1	orosomucoid 1 [Source:RGD Symbol;Acc:67390]	4.8938	3.42053	6.50671	1.77483	2.27479	2.66802	2.20629	1.14162	up
GO:0005576	extracellular region	cellular_component	3	0.540746	MSTRG.23343	Angptl7	angiopoietin like 7 [Source:RGD Symbol;Acc:7553363]	7.81835	7.9259	4.33571	2.35398	2.94155	2.14646	2.6982	1.432	up
GO:0005576	extracellular region	cellular_component	3	0.540746	MSTRG.28103	Col6a5	collagen type VI alpha 5 chain [Source:RGD Symbol;Acc:1565804]	0.755555	1.13807	0.76111	2.0422	1.98002	1.51814	0.479162	-1.06141	down
GO:0005576	extracellular region	cellular_component	3	0.540746	MSTRG.29376	Igfbp2	insulin-like growth factor binding protein 2 [Source:RGD Symbol;Acc:2873]	0.073613	0.214964	0.510057	2.1311	1.26299	0.635682	0.198184	-2.33509	down
GO:0005576	extracellular region	cellular_component	3	0.540746	MSTRG.7077	Adipoq	adiponectin, C1Q and collagen domain containing [Source:RGD Symbol;Acc:628748]	1.56388	0.891889	1.23395	0.20421	0.211193	0.290087	5.23001	2.38681	up
GO:0004497	monooxygenase activity	molecular_function	5	0.544306	ENSRNOG00000019500	Cyp1a1	cytochrome P450, family 1, subfamily a, polypeptide 1 [Source:RGD Symbol;Acc:2458]	0.03592	0.0001	0.081544	0.280251	0.378238	0.727885	0.0847996	-3.5598	down
GO:0007010	cytoskeleton organization	biological_process	6	0.544306	MSTRG.14618	Rhou	ras homolog family member U [Source:MGI Symbol;Acc:MGI:1916831]	2.42309	1.84505	2.54412	2.55395	2.5103	9.21669	0.477017	-1.06789	down
GO:0006952	defense response	biological_process	5	0.547559	MSTRG.17011	Hspa1b	heat shock protein family A (Hsp70) member 1B [Source:RGD Symbol;Acc:2840]	5.24329	5.52474	2.7742	7.21687	11.7813	14.7747	0.40098	-1.3184	down
GO:0003774	motor activity	molecular_function	9	0.547559	MSTRG.10649	Myh6	myosin heavy chain 7 [Source:RGD Symbol;Acc:62030];myosin heavy chain 6 [Source:RGD Symbol;Acc:62029]	0.997238	1.06135	0.328905	1.69535	2.31046	1.00868	0.476118	-1.07061	down
GO:0047485	protein N-terminus binding	molecular_function	5	0.547559	MSTRG.17011	Hspa1b	heat shock protein family A (Hsp70) member 1B [Source:RGD Symbol;Acc:2840]	5.24329	5.52474	2.7742	7.21687	11.7813	14.7747	0.40098	-1.3184	down
GO:0010033	response to organic substance	biological_process	5	0.550789	ENSRNOG00000019500	Cyp1a1	cytochrome P450, family 1, subfamily a, polypeptide 1 [Source:RGD Symbol;Acc:2458]	0.03592	0.0001	0.081544	0.280251	0.378238	0.727885	0.0847996	-3.5598	down
GO:0051091	positive regulation of DNA-binding transcription factor activity	biological_process	6	0.550789	MSTRG.9802	Cytl1	cytokine like 1 [Source:RGD Symbol;Acc:1561846]	8.09952	20.2674	26.2093	6.62096	2.89882	3.34061	4.24375	2.08534	up
GO:0005923	bicellular tight junction	cellular_component	6	0.550789	ENSRNOG00000001926	Cldn1	claudin 1 [Source:RGD Symbol;Acc:68422]	0.488957	0.588734	0.237891	0.155539	0.268818	0.188699	2.14594	1.10161	up
GO:0042826	histone deacetylase binding	molecular_function	6	0.553997	MSTRG.17011	Hspa1b	heat shock protein family A (Hsp70) member 1B [Source:RGD Symbol;Acc:2840]	5.24329	5.52474	2.7742	7.21687	11.7813	14.7747	0.40098	-1.3184	down
GO:0032869	cellular response to insulin stimulus	biological_process	8	0.553997	MSTRG.7077	Adipoq	adiponectin, C1Q and collagen domain containing [Source:RGD Symbol;Acc:628748]	1.56388	0.891889	1.23395	0.20421	0.211193	0.290087	5.23001	2.38681	up
GO:0098794	postsynapse	cellular_component	4	0.553997	ENSRNOG00000045816	Gria1	glutamate ionotropic receptor AMPA type subunit 1 [Source:RGD Symbol;Acc:621531]	0.153662	0.0781212	0.0762892	0.328888	0.272742	0.303107	0.34051	-1.55423	down
GO:0061630	ubiquitin protein ligase activity	molecular_function	7	0.555274	MSTRG.4999	Trim17	tripartite motif-containing 17 [Source:RGD Symbol;Acc:69290]	0.158453	0.186512	0.244611	0.471663	0.441507	0.741154	0.356386	-1.48849	down
GO:0061630	ubiquitin protein ligase activity	molecular_function	7	0.555274	MSTRG.860	Rnf113a1	ring finger protein 113A1 [Source:RGD Symbol;Acc:1359693]	1.82938	1.04395	2.2839	0.897504	0.407751	0.592646	2.71734	1.44219	up
GO:0006914	autophagy	biological_process	6	0.557181	MSTRG.4999	Trim17	tripartite motif-containing 17 [Source:RGD Symbol;Acc:69290]	0.158453	0.186512	0.244611	0.471663	0.441507	0.741154	0.356386	-1.48849	down
GO:0070588	calcium ion transmembrane transport	biological_process	11	0.557181	ENSRNOG00000013053	Trpm6	transient receptor potential cation channel, subfamily M, member 6 [Source:RGD Symbol;Acc:1309942]	0.230886	0.220623	0.230274	0.013119	0.115142	0.093009	3.08123	1.6235	up
GO:0006954	inflammatory response	biological_process	6	0.557352	ENSRNOG00000006736	Ccr3	C-C motif chemokine receptor 3 [Source:RGD Symbol;Acc:620593]	0.539265	0.662872	0.240814	0.156602	0.179279	0.329123	2.16984	1.11759	up
GO:0006954	inflammatory response	biological_process	6	0.557352	MSTRG.2394	Csrp3	cysteine and glycine rich protein 3 [Source:RGD Symbol;Acc:71092]	0.636871	1.03978	0.697614	1.76671	2.35583	1.56165	0.417697	-1.25947	down
GO:0003690	double-stranded DNA binding	molecular_function	7	0.560343	MSTRG.1247	RGD1559962	similar to High mobility group protein 2 (HMG-2) [Source:RGD Symbol;Acc:1559962]	2.0089	1.58098	1.57628	1.87562	4.21377	5.19355	0.457874	-1.12698	down
GO:0004222	metalloendopeptidase activity	molecular_function	8	0.560343	MSTRG.26806	Mmp10	matrix metallopeptidase 10 [Source:RGD Symbol;Acc:620192]	0.65082	0.677513	0.764298	0.351474	0.357167	0.30782	2.05874	1.04176	up
GO:0030336	negative regulation of cell migration	biological_process	8	0.563482	MSTRG.7077	Adipoq	adiponectin, C1Q and collagen domain containing [Source:RGD Symbol;Acc:628748]	1.56388	0.891889	1.23395	0.20421	0.211193	0.290087	5.23001	2.38681	up
GO:0030324	lung development	biological_process	6	0.5666	MSTRG.1268	Ccn2	cellular communication network factor 2 [Source:RGD Symbol;Acc:621392]	97.162	163.002	90.2827	62.7941	47.5404	55.8168	2.1092	1.0767	up
GO:0004867	serine-type endopeptidase inhibitor activity	molecular_function	8	0.5666	MSTRG.19523	Eppin	epididymal peptidase inhibitor [Source:RGD Symbol;Acc:1597722]	0.324507	0.145258	0.262712	0.463882	0.553782	0.5654	0.462696	-1.11186	down
GO:0031667	response to nutrient levels	biological_process	6	0.5666	MSTRG.7077	Adipoq	adiponectin, C1Q and collagen domain containing [Source:RGD Symbol;Acc:628748]	1.56388	0.891889	1.23395	0.20421	0.211193	0.290087	5.23001	2.38681	up
GO:0055037	recycling endosome	cellular_component	8	0.569695	ENSRNOG00000045816	Gria1	glutamate ionotropic receptor AMPA type subunit 1 [Source:RGD Symbol;Acc:621531]	0.153662	0.0781212	0.0762892	0.328888	0.272742	0.303107	0.34051	-1.55423	down
GO:0005179	hormone activity	molecular_function	7	0.569695	MSTRG.7077	Adipoq	adiponectin, C1Q and collagen domain containing [Source:RGD Symbol;Acc:628748]	1.56388	0.891889	1.23395	0.20421	0.211193	0.290087	5.23001	2.38681	up
GO:0006816	calcium ion transport	biological_process	10	0.572768	ENSRNOG00000013053	Trpm6	transient receptor potential cation channel, subfamily M, member 6 [Source:RGD Symbol;Acc:1309942]	0.230886	0.220623	0.230274	0.013119	0.115142	0.093009	3.08123	1.6235	up
GO:0032991	protein-containing complex	cellular_component	3	0.578102	ENSRNOG00000001926	Cldn1	claudin 1 [Source:RGD Symbol;Acc:68422]	0.488957	0.588734	0.237891	0.155539	0.268818	0.188699	2.14594	1.10161	up
GO:0032991	protein-containing complex	cellular_component	3	0.578102	MSTRG.17011	Hspa1b	heat shock protein family A (Hsp70) member 1B [Source:RGD Symbol;Acc:2840]	5.24329	5.52474	2.7742	7.21687	11.7813	14.7747	0.40098	-1.3184	down
GO:0032991	protein-containing complex	cellular_component	3	0.578102	MSTRG.19523	Eppin	epididymal peptidase inhibitor [Source:RGD Symbol;Acc:1597722]	0.324507	0.145258	0.262712	0.463882	0.553782	0.5654	0.462696	-1.11186	down
GO:0032991	protein-containing complex	cellular_component	3	0.578102	MSTRG.27342	Cryab	crystallin, alpha B [Source:RGD Symbol;Acc:2414]	4.40167	3.16475	1.93664	6.6383	11.8965	6.47058	0.380041	-1.39577	down
GO:0032991	protein-containing complex	cellular_component	3	0.578102	MSTRG.7077	Adipoq	adiponectin, C1Q and collagen domain containing [Source:RGD Symbol;Acc:628748]	1.56388	0.891889	1.23395	0.20421	0.211193	0.290087	5.23001	2.38681	up
GO:0071456	cellular response to hypoxia	biological_process	6	0.578849	ENSRNOG00000005008	Angpt4	angiopoietin 4 [Source:RGD Symbol;Acc:1307539]	0.957383	0.605696	0.869505	0.442478	0.367232	0.262644	2.26845	1.18171	up
GO:0005912	adherens junction	cellular_component	5	0.584844	MSTRG.25662	Frs2	fibroblast growth factor receptor substrate 2 [Source:RGD Symbol;Acc:1308201]	1.85463	2.23289	2.7624	1.887	8.46212	8.22208	0.368846	-1.43891	down
GO:0005178	integrin binding	molecular_function	6	0.584844	MSTRG.1268	Ccn2	cellular communication network factor 2 [Source:RGD Symbol;Acc:621392]	97.162	163.002	90.2827	62.7941	47.5404	55.8168	2.1092	1.0767	up
GO:0005777	peroxisome	cellular_component	7	0.584844	MSTRG.21596	Far2	fatty acyl CoA reductase 2 [Source:RGD Symbol;Acc:1565966]	4.70552	2.47182	3.21356	1.81247	1.36236	1.33524	2.30393	1.2041	up
GO:0043123	positive regulation of I-kappaB kinase/NF-kappaB signaling	biological_process	10	0.58781	MSTRG.7077	Adipoq	adiponectin, C1Q and collagen domain containing [Source:RGD Symbol;Acc:628748]	1.56388	0.891889	1.23395	0.20421	0.211193	0.290087	5.23001	2.38681	up
GO:0030141	secretory granule	cellular_component	8	0.593678	MSTRG.10688	Cma1	chymase 1 [Source:RGD Symbol;Acc:2365]	4.6429	2.56201	3.59294	1.91197	1.46093	1.90488	2.04591	1.03274	up
GO:0005814	centriole	cellular_component	6	0.593678	MSTRG.17011	Hspa1b	heat shock protein family A (Hsp70) member 1B [Source:RGD Symbol;Acc:2840]	5.24329	5.52474	2.7742	7.21687	11.7813	14.7747	0.40098	-1.3184	down
GO:0007156	homophilic cell adhesion via plasma membrane adhesion molecules	biological_process	7	0.596581	ENSRNOG00000008054	Igsf9	immunoglobulin superfamily, member 9 [Source:RGD Symbol;Acc:1304566]	0.292083	0.261639	0.287037	0.673067	0.658462	0.633483	0.427864	-1.22477	down
GO:0006886	intracellular protein transport	biological_process	10	0.601323	MSTRG.19016	Mal	mal, T-cell differentiation protein [Source:RGD Symbol;Acc:3037]	1.70514	1.76004	1.8063	0.88808	0.918323	0.823618	2.00435	1.00314	up
GO:0006886	intracellular protein transport	biological_process	10	0.601323	MSTRG.26142	Gpihbp1	glycosylphosphatidylinositol anchored high density lipoprotein binding protein 1 [Source:RGD Symbol;Acc:1564237]	2.63219	2.08795	1.30847	0.676363	0.879262	1.01499	2.3452	1.22971	up
GO:0098609	cell-cell adhesion	biological_process	5	0.607989	ENSRNOG00000008054	Igsf9	immunoglobulin superfamily, member 9 [Source:RGD Symbol;Acc:1304566]	0.292083	0.261639	0.287037	0.673067	0.658462	0.633483	0.427864	-1.22477	down
GO:0016567	protein ubiquitination	biological_process	11	0.613672	MSTRG.4999	Trim17	tripartite motif-containing 17 [Source:RGD Symbol;Acc:69290]	0.158453	0.186512	0.244611	0.471663	0.441507	0.741154	0.356386	-1.48849	down
GO:0016567	protein ubiquitination	biological_process	11	0.613672	MSTRG.7866	Rack1	receptor for activated C kinase 1 [Source:RGD Symbol;Acc:69229]	2.12116	1.74372	0.700888	3.26988	5.21372	1.65053	0.450533	-1.15029	down
GO:0016567	protein ubiquitination	biological_process	11	0.613672	MSTRG.860	Rnf113a1	ring finger protein 113A1 [Source:RGD Symbol;Acc:1359693]	1.82938	1.04395	2.2839	0.897504	0.407751	0.592646	2.71734	1.44219	up
GO:0008360	regulation of cell shape	biological_process	8	0.616334	MSTRG.14618	Rhou	ras homolog family member U [Source:MGI Symbol;Acc:MGI:1916831]	2.42309	1.84505	2.54412	2.55395	2.5103	9.21669	0.477017	-1.06789	down
GO:0010628	positive regulation of gene expression	biological_process	8	0.618235	MSTRG.1247	RGD1559962	similar to High mobility group protein 2 (HMG-2) [Source:RGD Symbol;Acc:1559962]	2.0089	1.58098	1.57628	1.87562	4.21377	5.19355	0.457874	-1.12698	down
GO:0010628	positive regulation of gene expression	biological_process	8	0.618235	MSTRG.1268	Ccn2	cellular communication network factor 2 [Source:RGD Symbol;Acc:621392]	97.162	163.002	90.2827	62.7941	47.5404	55.8168	2.1092	1.0767	up
GO:0010628	positive regulation of gene expression	biological_process	8	0.618235	MSTRG.17011	Hspa1b	heat shock protein family A (Hsp70) member 1B [Source:RGD Symbol;Acc:2840]	5.24329	5.52474	2.7742	7.21687	11.7813	14.7747	0.40098	-1.3184	down
GO:0043025	neuronal cell body	cellular_component	5	0.618235	ENSRNOG00000000873	Brs3	bombesin receptor subtype 3 [Source:RGD Symbol;Acc:628645]	0.684856	0.476728	0.325205	0.138879	0.100965	0.373652	2.42347	1.27707	up
GO:0043025	neuronal cell body	cellular_component	5	0.618235	ENSRNOG00000045816	Gria1	glutamate ionotropic receptor AMPA type subunit 1 [Source:RGD Symbol;Acc:621531]	0.153662	0.0781212	0.0762892	0.328888	0.272742	0.303107	0.34051	-1.55423	down
GO:0043025	neuronal cell body	cellular_component	5	0.618235	MSTRG.7866	Rack1	receptor for activated C kinase 1 [Source:RGD Symbol;Acc:69229]	2.12116	1.74372	0.700888	3.26988	5.21372	1.65053	0.450533	-1.15029	down
GO:0016746	transferase activity, transferring acyl groups	molecular_function	5	0.619076	MSTRG.2812	Lipt2	lipoyl(octanoyl) transferase 2 [Source:RGD Symbol;Acc:1305211]	0.283157	0.506009	0.480529	0.88151	1.24304	0.745033	0.442466	-1.17636	down
GO:0006338	chromatin remodeling	biological_process	6	0.619076	MSTRG.1247	RGD1559962	similar to High mobility group protein 2 (HMG-2) [Source:RGD Symbol;Acc:1559962]	2.0089	1.58098	1.57628	1.87562	4.21377	5.19355	0.457874	-1.12698	down
GO:0008201	heparin binding	molecular_function	6	0.619076	MSTRG.1268	Ccn2	cellular communication network factor 2 [Source:RGD Symbol;Acc:621392]	97.162	163.002	90.2827	62.7941	47.5404	55.8168	2.1092	1.0767	up
GO:0051726	regulation of cell cycle	biological_process	6	0.624502	MSTRG.7866	Rack1	receptor for activated C kinase 1 [Source:RGD Symbol;Acc:69229]	2.12116	1.74372	0.700888	3.26988	5.21372	1.65053	0.450533	-1.15029	down
GO:0006631	fatty acid metabolic process	biological_process	9	0.624502	ENSRNOG00000019500	Cyp1a1	cytochrome P450, family 1, subfamily a, polypeptide 1 [Source:RGD Symbol;Acc:2458]	0.03592	0.0001	0.081544	0.280251	0.378238	0.727885	0.0847996	-3.5598	down
GO:0003924	GTPase activity	molecular_function	9	0.627563	ENSRNOG00000001959	Mx1	myxovirus (influenza virus) resistance 1 [Source:RGD Symbol;Acc:3127]	1.36213	1.98217	0.602343	0.390254	0.481713	0.904944	2.22107	1.15126	up
GO:0003924	GTPase activity	molecular_function	9	0.627563	MSTRG.14618	Rhou	ras homolog family member U [Source:MGI Symbol;Acc:MGI:1916831]	2.42309	1.84505	2.54412	2.55395	2.5103	9.21669	0.477017	-1.06789	down
GO:0007268	chemical synaptic transmission	biological_process	9	0.629852	ENSRNOG00000045816	Gria1	glutamate ionotropic receptor AMPA type subunit 1 [Source:RGD Symbol;Acc:621531]	0.153662	0.0781212	0.0762892	0.328888	0.272742	0.303107	0.34051	-1.55423	down
GO:0019901	protein kinase binding	molecular_function	7	0.631707	ENSRNOG00000005964	Nr4a3	nuclear receptor subfamily 4, group A, member 3 [Source:RGD Symbol;Acc:61882]	0.829097	0.535612	0.350647	0.270902	0.310903	0.258833	2.04054	1.02895	up
GO:0019901	protein kinase binding	molecular_function	7	0.631707	MSTRG.10649	Myh6	myosin heavy chain 7 [Source:RGD Symbol;Acc:62030];myosin heavy chain 6 [Source:RGD Symbol;Acc:62029]	0.997238	1.06135	0.328905	1.69535	2.31046	1.00868	0.476118	-1.07061	down
GO:0019901	protein kinase binding	molecular_function	7	0.631707	MSTRG.1771	Tnni3	dynein, axonemal, assembly factor 3 [Source:RGD Symbol;Acc:2323487];troponin I3, cardiac type [Source:RGD Symbol;Acc:62052]	0.232226	0.361112	0.142345	0.656005	0.490498	0.460709	0.457739	-1.1274	down
GO:0008152	metabolic process	biological_process	3	0.632498	MSTRG.25663	Lyc2	lysozyme C type 2 [Source:RGD Symbol;Acc:1593616]	41.8054	26.3828	18.9251	18.5648	14.441	7.07027	2.1737	1.12015	up
GO:0008021	synaptic vesicle	cellular_component	4	0.632498	ENSRNOG00000045816	Gria1	glutamate ionotropic receptor AMPA type subunit 1 [Source:RGD Symbol;Acc:621531]	0.153662	0.0781212	0.0762892	0.328888	0.272742	0.303107	0.34051	-1.55423	down
GO:0030496	midbody	cellular_component	4	0.632498	MSTRG.7866	Rack1	receptor for activated C kinase 1 [Source:RGD Symbol;Acc:69229]	2.12116	1.74372	0.700888	3.26988	5.21372	1.65053	0.450533	-1.15029	down
GO:0000398	mRNA splicing, via spliceosome	biological_process	13	0.64545	MSTRG.860	Rnf113a1	ring finger protein 113A1 [Source:RGD Symbol;Acc:1359693]	1.82938	1.04395	2.2839	0.897504	0.407751	0.592646	2.71734	1.44219	up
GO:0016829	lyase activity	molecular_function	4	0.64545	ENSRNOG00000019500	Cyp1a1	cytochrome P450, family 1, subfamily a, polypeptide 1 [Source:RGD Symbol;Acc:2458]	0.03592	0.0001	0.081544	0.280251	0.378238	0.727885	0.0847996	-3.5598	down
GO:0072659	protein localization to plasma membrane	biological_process	8	0.647986	MSTRG.7077	Adipoq	adiponectin, C1Q and collagen domain containing [Source:RGD Symbol;Acc:628748]	1.56388	0.891889	1.23395	0.20421	0.211193	0.290087	5.23001	2.38681	up
GO:0043065	positive regulation of apoptotic process	biological_process	9	0.648981	MSTRG.21375	Klrk1	killer cell lectin like receptor K1 [Source:RGD Symbol;Acc:3180]	3.23628	1.16965	1.88792	0.905104	0.662451	1.16837	2.30045	1.20191	up
GO:0043065	positive regulation of apoptotic process	biological_process	9	0.648981	MSTRG.7866	Rack1	receptor for activated C kinase 1 [Source:RGD Symbol;Acc:69229]	2.12116	1.74372	0.700888	3.26988	5.21372	1.65053	0.450533	-1.15029	down
GO:0007166	cell surface receptor signaling pathway	biological_process	5	0.655485	MSTRG.27243	Cd3g	CD3g molecule [Source:RGD Symbol;Acc:1307718]	3.1597	3.36923	1.43494	0.802837	0.611571	1.27998	2.95572	1.56351	up
GO:0001822	kidney development	biological_process	6	0.655485	MSTRG.13078	Greb1l	GREB1 like retinoic acid receptor coactivator [Source:RGD Symbol;Acc:1562371]	0.243967	0.318463	0.335822	0.11646	0.127973	0.1975	2.03255	1.02329	up
GO:0008233	peptidase activity	molecular_function	5	0.663253	MSTRG.10688	Cma1	chymase 1 [Source:RGD Symbol;Acc:2365]	4.6429	2.56201	3.59294	1.91197	1.46093	1.90488	2.04591	1.03274	up
GO:0008233	peptidase activity	molecular_function	5	0.663253	MSTRG.23275	Ddi2	DNA damage inducible 1 homolog 2 [Source:RGD Symbol;Acc:1311815]	10.1342	3.79607	10.2228	3.09844	3.26578	3.1576	2.5366	1.34289	up
GO:0008233	peptidase activity	molecular_function	5	0.663253	MSTRG.26806	Mmp10	matrix metallopeptidase 10 [Source:RGD Symbol;Acc:620192]	0.65082	0.677513	0.764298	0.351474	0.357167	0.30782	2.05874	1.04176	up
GO:0034220	ion transmembrane transport	biological_process	7	0.667632	ENSRNOG00000045816	Gria1	glutamate ionotropic receptor AMPA type subunit 1 [Source:RGD Symbol;Acc:621531]	0.153662	0.0781212	0.0762892	0.328888	0.272742	0.303107	0.34051	-1.55423	down
GO:0043524	negative regulation of neuron apoptotic process	biological_process	10	0.67001	ENSRNOG00000005964	Nr4a3	nuclear receptor subfamily 4, group A, member 3 [Source:RGD Symbol;Acc:61882]	0.829097	0.535612	0.350647	0.270902	0.310903	0.258833	2.04054	1.02895	up
GO:0005509	calcium ion binding	molecular_function	7	0.676076	ENSRNOG00000018480	Capn9	calpain 9 [Source:RGD Symbol;Acc:70965]	0.16122	0.105673	0.226045	0.394335	0.248195	0.41808	0.464768	-1.10542	down
GO:0005509	calcium ion binding	molecular_function	7	0.676076	ENSRNOG00000026764	Pla2g4c	phospholipase A2 group IVC [Source:RGD Symbol;Acc:1594658]	0.486308	0.281544	0.148092	0.0390525	0.0591423	0.217515	2.90122	1.53666	up
GO:0005509	calcium ion binding	molecular_function	7	0.676076	ENSRNOG00000053979	Egf	epidermal growth factor [Source:RGD Symbol;Acc:2542]	0.168282	0.113928	0.0974724	0.246911	0.315637	0.326161	0.427229	-1.22692	down
GO:0005509	calcium ion binding	molecular_function	7	0.676076	MSTRG.1772	Tnnt1	troponin T1, slow skeletal type [Source:RGD Symbol;Acc:621852]	0.431625	0.589243	0.648615	2.42819	2.30412	1.00538	0.290968	-1.78107	down
GO:0015630	microtubule cytoskeleton	cellular_component	7	0.679354	MSTRG.27342	Cryab	crystallin, alpha B [Source:RGD Symbol;Acc:2414]	4.40167	3.16475	1.93664	6.6383	11.8965	6.47058	0.380041	-1.39577	down
GO:0045211	postsynaptic membrane	cellular_component	5	0.679354	ENSRNOG00000045816	Gria1	glutamate ionotropic receptor AMPA type subunit 1 [Source:RGD Symbol;Acc:621531]	0.153662	0.0781212	0.0762892	0.328888	0.272742	0.303107	0.34051	-1.55423	down
GO:0008237	metallopeptidase activity	molecular_function	7	0.679354	MSTRG.26806	Mmp10	matrix metallopeptidase 10 [Source:RGD Symbol;Acc:620192]	0.65082	0.677513	0.764298	0.351474	0.357167	0.30782	2.05874	1.04176	up
GO:0020037	heme binding	molecular_function	6	0.681649	ENSRNOG00000019500	Cyp1a1	cytochrome P450, family 1, subfamily a, polypeptide 1 [Source:RGD Symbol;Acc:2458]	0.03592	0.0001	0.081544	0.280251	0.378238	0.727885	0.0847996	-3.5598	down
GO:0005635	nuclear envelope	cellular_component	6	0.686189	ENSRNOG00000026764	Pla2g4c	phospholipase A2 group IVC [Source:RGD Symbol;Acc:1594658]	0.486308	0.281544	0.148092	0.0390525	0.0591423	0.217515	2.90122	1.53666	up
GO:0006508	proteolysis	biological_process	7	0.687758	ENSRNOG00000018480	Capn9	calpain 9 [Source:RGD Symbol;Acc:70965]	0.16122	0.105673	0.226045	0.394335	0.248195	0.41808	0.464768	-1.10542	down
GO:0006508	proteolysis	biological_process	7	0.687758	MSTRG.10688	Cma1	chymase 1 [Source:RGD Symbol;Acc:2365]	4.6429	2.56201	3.59294	1.91197	1.46093	1.90488	2.04591	1.03274	up
GO:0006508	proteolysis	biological_process	7	0.687758	MSTRG.23275	Ddi2	DNA damage inducible 1 homolog 2 [Source:RGD Symbol;Acc:1311815]	10.1342	3.79607	10.2228	3.09844	3.26578	3.1576	2.5366	1.34289	up
GO:0006508	proteolysis	biological_process	7	0.687758	MSTRG.26806	Mmp10	matrix metallopeptidase 10 [Source:RGD Symbol;Acc:620192]	0.65082	0.677513	0.764298	0.351474	0.357167	0.30782	2.05874	1.04176	up
GO:0008236	serine-type peptidase activity	molecular_function	6	0.690665	MSTRG.10688	Cma1	chymase 1 [Source:RGD Symbol;Acc:2365]	4.6429	2.56201	3.59294	1.91197	1.46093	1.90488	2.04591	1.03274	up
GO:0042981	regulation of apoptotic process	biological_process	8	0.695078	MSTRG.25662	Frs2	fibroblast growth factor receptor substrate 2 [Source:RGD Symbol;Acc:1308201]	1.85463	2.23289	2.7624	1.887	8.46212	8.22208	0.368846	-1.43891	down
GO:0030246	carbohydrate binding	molecular_function	4	0.699428	MSTRG.21375	Klrk1	killer cell lectin like receptor K1 [Source:RGD Symbol;Acc:3180]	3.23628	1.16965	1.88792	0.905104	0.662451	1.16837	2.30045	1.20191	up
GO:0030182	neuron differentiation	biological_process	6	0.70158	MSTRG.17011	Hspa1b	heat shock protein family A (Hsp70) member 1B [Source:RGD Symbol;Acc:2840]	5.24329	5.52474	2.7742	7.21687	11.7813	14.7747	0.40098	-1.3184	down
GO:0004888	transmembrane signaling receptor activity	molecular_function	5	0.703717	MSTRG.27243	Cd3g	CD3g molecule [Source:RGD Symbol;Acc:1307718]	3.1597	3.36923	1.43494	0.802837	0.611571	1.27998	2.95572	1.56351	up
GO:0005802	trans-Golgi network	cellular_component	7	0.707945	MSTRG.14059	Scoc	short coiled-coil protein [Source:RGD Symbol;Acc:1311860]	10.7525	4.35	10.9578	3.38544	3.16803	3.38759	2.62148	1.39038	up
GO:0007411	axon guidance	biological_process	6	0.710036	ENSRNOG00000005964	Nr4a3	nuclear receptor subfamily 4, group A, member 3 [Source:RGD Symbol;Acc:61882]	0.829097	0.535612	0.350647	0.270902	0.310903	0.258833	2.04054	1.02895	up
GO:0030036	actin cytoskeleton organization	biological_process	7	0.710036	MSTRG.14618	Rhou	ras homolog family member U [Source:MGI Symbol;Acc:MGI:1916831]	2.42309	1.84505	2.54412	2.55395	2.5103	9.21669	0.477017	-1.06789	down
GO:0010468	regulation of gene expression	biological_process	7	0.711907	MSTRG.3425	Irf7	interferon regulatory factor 7 [Source:RGD Symbol;Acc:1307828]	3.76225	5.28163	2.92289	1.06032	1.17443	1.60451	3.11694	1.64013	up
GO:0010468	regulation of gene expression	biological_process	7	0.711907	MSTRG.4999	Trim17	tripartite motif-containing 17 [Source:RGD Symbol;Acc:69290]	0.158453	0.186512	0.244611	0.471663	0.441507	0.741154	0.356386	-1.48849	down
GO:0003714	transcription corepressor activity	molecular_function	5	0.712113	MSTRG.17011	Hspa1b	heat shock protein family A (Hsp70) member 1B [Source:RGD Symbol;Acc:2840]	5.24329	5.52474	2.7742	7.21687	11.7813	14.7747	0.40098	-1.3184	down
GO:0005975	carbohydrate metabolic process	biological_process	5	0.718254	MSTRG.26667	Gpd1	glycerol-3-phosphate dehydrogenase 1 [Source:RGD Symbol;Acc:621381]	2.5	0.764599	1.04927	0.560462	0.529418	0.458827	2.78547	1.47792	up
GO:0042025	host cell nucleus	cellular_component	8	0.720272	ENSRNOG00000005964	Nr4a3	nuclear receptor subfamily 4, group A, member 3 [Source:RGD Symbol;Acc:61882]	0.829097	0.535612	0.350647	0.270902	0.310903	0.258833	2.04054	1.02895	up
GO:0008285	negative regulation of cell population proliferation	biological_process	7	0.723594	MSTRG.17011	Hspa1b	heat shock protein family A (Hsp70) member 1B [Source:RGD Symbol;Acc:2840]	5.24329	5.52474	2.7742	7.21687	11.7813	14.7747	0.40098	-1.3184	down
GO:0008285	negative regulation of cell population proliferation	biological_process	7	0.723594	MSTRG.4039	Ifit3	interferon-induced protein with tetratricopeptide repeats 3 [Source:RGD Symbol;Acc:1359681]	4.97721	3.52241	3.21606	1.3741	1.53573	2.40418	2.20468	1.14057	up
GO:0071222	cellular response to lipopolysaccharide	biological_process	8	0.724265	MSTRG.21375	Klrk1	killer cell lectin like receptor K1 [Source:RGD Symbol;Acc:3180]	3.23628	1.16965	1.88792	0.905104	0.662451	1.16837	2.30045	1.20191	up
GO:0008270	zinc ion binding	molecular_function	8	0.733588	ENSRNOG00000005964	Nr4a3	nuclear receptor subfamily 4, group A, member 3 [Source:RGD Symbol;Acc:61882]	0.829097	0.535612	0.350647	0.270902	0.310903	0.258833	2.04054	1.02895	up
GO:0008270	zinc ion binding	molecular_function	8	0.733588	MSTRG.13940	Mt2A	metallothionein 2A [Source:RGD Symbol;Acc:1592345]	29.572	46.2534	20.3646	9.09823	9.9753	10.0336	3.30469	1.72452	up
GO:0008270	zinc ion binding	molecular_function	8	0.733588	MSTRG.26806	Mmp10	matrix metallopeptidase 10 [Source:RGD Symbol;Acc:620192]	0.65082	0.677513	0.764298	0.351474	0.357167	0.30782	2.05874	1.04176	up
GO:0008270	zinc ion binding	molecular_function	8	0.733588	MSTRG.4999	Trim17	tripartite motif-containing 17 [Source:RGD Symbol;Acc:69290]	0.158453	0.186512	0.244611	0.471663	0.441507	0.741154	0.356386	-1.48849	down
GO:0007275	multicellular organism development	biological_process	4	0.736946	ENSRNOG00000008054	Igsf9	immunoglobulin superfamily, member 9 [Source:RGD Symbol;Acc:1304566]	0.292083	0.261639	0.287037	0.673067	0.658462	0.633483	0.427864	-1.22477	down
GO:0007275	multicellular organism development	biological_process	4	0.736946	MSTRG.29376	Igfbp2	insulin-like growth factor binding protein 2 [Source:RGD Symbol;Acc:2873]	0.073613	0.214964	0.510057	2.1311	1.26299	0.635682	0.198184	-2.33509	down
GO:0007275	multicellular organism development	biological_process	4	0.736946	MSTRG.7866	Rack1	receptor for activated C kinase 1 [Source:RGD Symbol;Acc:69229]	2.12116	1.74372	0.700888	3.26988	5.21372	1.65053	0.450533	-1.15029	down
GO:0005525	GTP binding	molecular_function	8	0.740378	ENSRNOG00000001959	Mx1	myxovirus (influenza virus) resistance 1 [Source:RGD Symbol;Acc:3127]	1.36213	1.98217	0.602343	0.390254	0.481713	0.904944	2.22107	1.15126	up
GO:0005525	GTP binding	molecular_function	8	0.740378	MSTRG.14618	Rhou	ras homolog family member U [Source:MGI Symbol;Acc:MGI:1916831]	2.42309	1.84505	2.54412	2.55395	2.5103	9.21669	0.477017	-1.06789	down
GO:0030154	cell differentiation	biological_process	5	0.74039	ENSRNOG00000008054	Igsf9	immunoglobulin superfamily, member 9 [Source:RGD Symbol;Acc:1304566]	0.292083	0.261639	0.287037	0.673067	0.658462	0.633483	0.427864	-1.22477	down
GO:0030154	cell differentiation	biological_process	5	0.74039	MSTRG.1268	Ccn2	cellular communication network factor 2 [Source:RGD Symbol;Acc:621392]	97.162	163.002	90.2827	62.7941	47.5404	55.8168	2.1092	1.0767	up
GO:0030154	cell differentiation	biological_process	5	0.74039	MSTRG.21375	Klrk1	killer cell lectin like receptor K1 [Source:RGD Symbol;Acc:3180]	3.23628	1.16965	1.88792	0.905104	0.662451	1.16837	2.30045	1.20191	up
GO:0005815	microtubule organizing center	cellular_component	6	0.741546	MSTRG.17011	Hspa1b	heat shock protein family A (Hsp70) member 1B [Source:RGD Symbol;Acc:2840]	5.24329	5.52474	2.7742	7.21687	11.7813	14.7747	0.40098	-1.3184	down
GO:0008022	protein C-terminus binding	molecular_function	5	0.745237	MSTRG.1268	Ccn2	cellular communication network factor 2 [Source:RGD Symbol;Acc:621392]	97.162	163.002	90.2827	62.7941	47.5404	55.8168	2.1092	1.0767	up
GO:0006325	chromatin organization	biological_process	5	0.748876	MSTRG.752	Morf4l2	mortality factor 4 like 2 [Source:RGD Symbol;Acc:1359471]	68.6344	76.9306	75.8236	18.1591	17.1081	17.1627	4.22256	2.07812	up
GO:0005515	protein binding	molecular_function	4	0.757117	ENSRNOG00000002053	Fras1	Fraser extracellular matrix complex subunit 1 [Source:RGD Symbol;Acc:1306516]	0.139257	0.067374	0.065133	0.196717	0.15547	0.194714	0.496916	-1.00893	down
GO:0005515	protein binding	molecular_function	4	0.757117	ENSRNOG00000005964	Nr4a3	nuclear receptor subfamily 4, group A, member 3 [Source:RGD Symbol;Acc:61882]	0.829097	0.535612	0.350647	0.270902	0.310903	0.258833	2.04054	1.02895	up
GO:0005515	protein binding	molecular_function	4	0.757117	ENSRNOG00000008054	Igsf9	immunoglobulin superfamily, member 9 [Source:RGD Symbol;Acc:1304566]	0.292083	0.261639	0.287037	0.673067	0.658462	0.633483	0.427864	-1.22477	down
GO:0005515	protein binding	molecular_function	4	0.757117	ENSRNOG00000012843	Aspg	asparaginase [Source:RGD Symbol;Acc:708388]	1.24767	0.675715	0.661911	1.89691	2.03053	1.60372	0.467406	-1.09725	down
GO:0005515	protein binding	molecular_function	4	0.757117	ENSRNOG00000017538	Lrrc27	leucine rich repeat containing 27 [Source:RGD Symbol;Acc:1559981]	0.129096	0.183214	0.0492539	0.437287	0.459725	0.19548	0.330953	-1.5953	down
GO:0005515	protein binding	molecular_function	4	0.757117	ENSRNOG00000019500	Cyp1a1	cytochrome P450, family 1, subfamily a, polypeptide 1 [Source:RGD Symbol;Acc:2458]	0.03592	0.0001	0.081544	0.280251	0.378238	0.727885	0.0847996	-3.5598	down
GO:0005515	protein binding	molecular_function	4	0.757117	ENSRNOG00000020872	Cd5	Cd5 molecule [Source:RGD Symbol;Acc:2309]	0.577905	0.540254	0.25983	0.0973373	0.177983	0.267674	2.53776	1.34356	up
GO:0005515	protein binding	molecular_function	4	0.757117	ENSRNOG00000032994	Myom3	myomesin 3 [Source:RGD Symbol;Acc:1310060]	0.440899	0.27448	0.374804	1.15099	1.0828	0.623768	0.381508	-1.39021	down
GO:0005515	protein binding	molecular_function	4	0.757117	MSTRG.10649	Myh6	myosin heavy chain 7 [Source:RGD Symbol;Acc:62030];myosin heavy chain 6 [Source:RGD Symbol;Acc:62029]	0.997238	1.06135	0.328905	1.69535	2.31046	1.00868	0.476118	-1.07061	down
GO:0005515	protein binding	molecular_function	4	0.757117	MSTRG.1268	Ccn2	cellular communication network factor 2 [Source:RGD Symbol;Acc:621392]	97.162	163.002	90.2827	62.7941	47.5404	55.8168	2.1092	1.0767	up
GO:0005515	protein binding	molecular_function	4	0.757117	MSTRG.17011	Hspa1b	heat shock protein family A (Hsp70) member 1B [Source:RGD Symbol;Acc:2840]	5.24329	5.52474	2.7742	7.21687	11.7813	14.7747	0.40098	-1.3184	down
GO:0005515	protein binding	molecular_function	4	0.757117	MSTRG.1771	Tnni3	dynein, axonemal, assembly factor 3 [Source:RGD Symbol;Acc:2323487];troponin I3, cardiac type [Source:RGD Symbol;Acc:62052]	0.232226	0.361112	0.142345	0.656005	0.490498	0.460709	0.457739	-1.1274	down
GO:0005515	protein binding	molecular_function	4	0.757117	MSTRG.21375	Klrk1	killer cell lectin like receptor K1 [Source:RGD Symbol;Acc:3180]	3.23628	1.16965	1.88792	0.905104	0.662451	1.16837	2.30045	1.20191	up
GO:0005515	protein binding	molecular_function	4	0.757117	MSTRG.23275	Ddi2	DNA damage inducible 1 homolog 2 [Source:RGD Symbol;Acc:1311815]	10.1342	3.79607	10.2228	3.09844	3.26578	3.1576	2.5366	1.34289	up
GO:0005515	protein binding	molecular_function	4	0.757117	MSTRG.23291	LOC100362149	ribosomal protein S20-like [Source:RGD Symbol;Acc:2318734]	5.17524	3.97197	5.25486	4.70844	14.5374	10.2089	0.488957	-1.03222	down
GO:0005515	protein binding	molecular_function	4	0.757117	MSTRG.27342	Cryab	crystallin, alpha B [Source:RGD Symbol;Acc:2414]	4.40167	3.16475	1.93664	6.6383	11.8965	6.47058	0.380041	-1.39577	down
GO:0005515	protein binding	molecular_function	4	0.757117	MSTRG.28255	Trank1	tetratricopeptide repeat and ankyrin repeat containing 1 [Source:RGD Symbol;Acc:1563130]	0.312328	0.474293	0.338589	0.125348	0.117702	0.259737	2.23795	1.16218	up
GO:0005515	protein binding	molecular_function	4	0.757117	MSTRG.28488	LOC100362684	ribosomal protein S20-like [Source:RGD Symbol;Acc:2324274]	4.34034	18.8852	4.45946	4.11471	2.30514	4.54696	2.52444	1.33596	up
GO:0005515	protein binding	molecular_function	4	0.757117	MSTRG.29050	Il18rap	interleukin 18 receptor accessory protein [Source:RGD Symbol;Acc:727867]	3.58786	2.45648	3.08283	1.61627	1.37962	1.35237	2.09904	1.06973	up
GO:0005515	protein binding	molecular_function	4	0.757117	MSTRG.3425	Irf7	interferon regulatory factor 7 [Source:RGD Symbol;Acc:1307828]	3.76225	5.28163	2.92289	1.06032	1.17443	1.60451	3.11694	1.64013	up
GO:0005515	protein binding	molecular_function	4	0.757117	MSTRG.4039	Ifit3	interferon-induced protein with tetratricopeptide repeats 3 [Source:RGD Symbol;Acc:1359681]	4.97721	3.52241	3.21606	1.3741	1.53573	2.40418	2.20468	1.14057	up
GO:0005515	protein binding	molecular_function	4	0.757117	MSTRG.4999	Trim17	tripartite motif-containing 17 [Source:RGD Symbol;Acc:69290]	0.158453	0.186512	0.244611	0.471663	0.441507	0.741154	0.356386	-1.48849	down
GO:0005515	protein binding	molecular_function	4	0.757117	MSTRG.7077	Adipoq	adiponectin, C1Q and collagen domain containing [Source:RGD Symbol;Acc:628748]	1.56388	0.891889	1.23395	0.20421	0.211193	0.290087	5.23001	2.38681	up
GO:0005515	protein binding	molecular_function	4	0.757117	MSTRG.7866	Rack1	receptor for activated C kinase 1 [Source:RGD Symbol;Acc:69229]	2.12116	1.74372	0.700888	3.26988	5.21372	1.65053	0.450533	-1.15029	down
GO:0004252	serine-type endopeptidase activity	molecular_function	8	0.761211	MSTRG.10688	Cma1	chymase 1 [Source:RGD Symbol;Acc:2365]	4.6429	2.56201	3.59294	1.91197	1.46093	1.90488	2.04591	1.03274	up
GO:0008289	lipid binding	molecular_function	4	0.764624	MSTRG.16024	Crabp2	cellular retinoic acid binding protein 2 [Source:RGD Symbol;Acc:62070]	2.61663	8.42398	7.11811	2.96094	3.12274	2.63796	2.08203	1.05799	up
GO:0005575	cellular_component	cellular_component	2	0.770735	ENSRNOG00000002053	Fras1	Fraser extracellular matrix complex subunit 1 [Source:RGD Symbol;Acc:1306516]	0.139257	0.067374	0.065133	0.196717	0.15547	0.194714	0.496916	-1.00893	down
GO:0005575	cellular_component	cellular_component	2	0.770735	ENSRNOG00000005008	Angpt4	angiopoietin 4 [Source:RGD Symbol;Acc:1307539]	0.957383	0.605696	0.869505	0.442478	0.367232	0.262644	2.26845	1.18171	up
GO:0005575	cellular_component	cellular_component	2	0.770735	ENSRNOG00000005964	Nr4a3	nuclear receptor subfamily 4, group A, member 3 [Source:RGD Symbol;Acc:61882]	0.829097	0.535612	0.350647	0.270902	0.310903	0.258833	2.04054	1.02895	up
GO:0005575	cellular_component	cellular_component	2	0.770735	ENSRNOG00000013053	Trpm6	transient receptor potential cation channel, subfamily M, member 6 [Source:RGD Symbol;Acc:1309942]	0.230886	0.220623	0.230274	0.013119	0.115142	0.093009	3.08123	1.6235	up
GO:0005575	cellular_component	cellular_component	2	0.770735	ENSRNOG00000018480	Capn9	calpain 9 [Source:RGD Symbol;Acc:70965]	0.16122	0.105673	0.226045	0.394335	0.248195	0.41808	0.464768	-1.10542	down
GO:0005575	cellular_component	cellular_component	2	0.770735	MSTRG.10586	Rnase6	ribonuclease A family member k6 [Source:RGD Symbol;Acc:1303020]	2.74194	2.3303	1.68547	1.0146	0.903928	1.33617	2.0763	1.05401	up
GO:0005575	cellular_component	cellular_component	2	0.770735	MSTRG.1247	RGD1559962	similar to High mobility group protein 2 (HMG-2) [Source:RGD Symbol;Acc:1559962]	2.0089	1.58098	1.57628	1.87562	4.21377	5.19355	0.457874	-1.12698	down
GO:0005575	cellular_component	cellular_component	2	0.770735	MSTRG.13940	Mt2A	metallothionein 2A [Source:RGD Symbol;Acc:1592345]	29.572	46.2534	20.3646	9.09823	9.9753	10.0336	3.30469	1.72452	up
GO:0005575	cellular_component	cellular_component	2	0.770735	MSTRG.17011	Hspa1b	heat shock protein family A (Hsp70) member 1B [Source:RGD Symbol;Acc:2840]	5.24329	5.52474	2.7742	7.21687	11.7813	14.7747	0.40098	-1.3184	down
GO:0005575	cellular_component	cellular_component	2	0.770735	MSTRG.29050	Il18rap	interleukin 18 receptor accessory protein [Source:RGD Symbol;Acc:727867]	3.58786	2.45648	3.08283	1.61627	1.37962	1.35237	2.09904	1.06973	up
GO:0005575	cellular_component	cellular_component	2	0.770735	MSTRG.752	Morf4l2	mortality factor 4 like 2 [Source:RGD Symbol;Acc:1359471]	68.6344	76.9306	75.8236	18.1591	17.1081	17.1627	4.22256	2.07812	up
GO:0070374	positive regulation of ERK1 and ERK2 cascade	biological_process	12	0.774574	MSTRG.1268	Ccn2	cellular communication network factor 2 [Source:RGD Symbol;Acc:621392]	97.162	163.002	90.2827	62.7941	47.5404	55.8168	2.1092	1.0767	up
GO:1990904	ribonucleoprotein complex	cellular_component	4	0.779391	MSTRG.17011	Hspa1b	heat shock protein family A (Hsp70) member 1B [Source:RGD Symbol;Acc:2840]	5.24329	5.52474	2.7742	7.21687	11.7813	14.7747	0.40098	-1.3184	down
GO:0016491	oxidoreductase activity	molecular_function	4	0.787874	ENSRNOG00000019500	Cyp1a1	cytochrome P450, family 1, subfamily a, polypeptide 1 [Source:RGD Symbol;Acc:2458]	0.03592	0.0001	0.081544	0.280251	0.378238	0.727885	0.0847996	-3.5598	down
GO:0016491	oxidoreductase activity	molecular_function	4	0.787874	MSTRG.21596	Far2	fatty acyl CoA reductase 2 [Source:RGD Symbol;Acc:1565966]	4.70552	2.47182	3.21356	1.81247	1.36236	1.33524	2.30393	1.2041	up
GO:0016491	oxidoreductase activity	molecular_function	4	0.787874	MSTRG.26667	Gpd1	glycerol-3-phosphate dehydrogenase 1 [Source:RGD Symbol;Acc:621381]	2.5	0.764599	1.04927	0.560462	0.529418	0.458827	2.78547	1.47792	up
GO:0003723	RNA binding	molecular_function	6	0.78973	ENSRNOG00000049282	Oas2	2'-5' oligoadenylate synthetase 2 [Source:RGD Symbol;Acc:1359697]	1.13584	0.796252	0.431963	0.36197	0.392657	0.369048	2.10386	1.07304	up
GO:0003723	RNA binding	molecular_function	6	0.78973	MSTRG.23291	LOC100362149	ribosomal protein S20-like [Source:RGD Symbol;Acc:2318734]	5.17524	3.97197	5.25486	4.70844	14.5374	10.2089	0.488957	-1.03222	down
GO:0003723	RNA binding	molecular_function	6	0.78973	MSTRG.28488	LOC100362684	ribosomal protein S20-like [Source:RGD Symbol;Acc:2324274]	4.34034	18.8852	4.45946	4.11471	2.30514	4.54696	2.52444	1.33596	up
GO:0003723	RNA binding	molecular_function	6	0.78973	MSTRG.4039	Ifit3	interferon-induced protein with tetratricopeptide repeats 3 [Source:RGD Symbol;Acc:1359681]	4.97721	3.52241	3.21606	1.3741	1.53573	2.40418	2.20468	1.14057	up
GO:0003723	RNA binding	molecular_function	6	0.78973	MSTRG.9720	LOC100361259	60S ribosomal protein L13-like [Source:RGD Symbol;Acc:2320504]	0.491681	2.86215	2.46051	0.440434	0.334145	0.708102	3.92151	1.97141	up
GO:0004842	ubiquitin-protein transferase activity	molecular_function	6	0.796195	MSTRG.4999	Trim17	tripartite motif-containing 17 [Source:RGD Symbol;Acc:69290]	0.158453	0.186512	0.244611	0.471663	0.441507	0.741154	0.356386	-1.48849	down
GO:0030054	cell junction	cellular_component	3	0.797401	ENSRNOG00000001926	Cldn1	claudin 1 [Source:RGD Symbol;Acc:68422]	0.488957	0.588734	0.237891	0.155539	0.268818	0.188699	2.14594	1.10161	up
GO:0030054	cell junction	cellular_component	3	0.797401	ENSRNOG00000008054	Igsf9	immunoglobulin superfamily, member 9 [Source:RGD Symbol;Acc:1304566]	0.292083	0.261639	0.287037	0.673067	0.658462	0.633483	0.427864	-1.22477	down
GO:0030054	cell junction	cellular_component	3	0.797401	ENSRNOG00000045816	Gria1	glutamate ionotropic receptor AMPA type subunit 1 [Source:RGD Symbol;Acc:621531]	0.153662	0.0781212	0.0762892	0.328888	0.272742	0.303107	0.34051	-1.55423	down
GO:0005667	transcription factor complex	cellular_component	4	0.803406	ENSRNOG00000005964	Nr4a3	nuclear receptor subfamily 4, group A, member 3 [Source:RGD Symbol;Acc:61882]	0.829097	0.535612	0.350647	0.270902	0.310903	0.258833	2.04054	1.02895	up
GO:0007155	cell adhesion	biological_process	4	0.808708	ENSRNOG00000001926	Cldn1	claudin 1 [Source:RGD Symbol;Acc:68422]	0.488957	0.588734	0.237891	0.155539	0.268818	0.188699	2.14594	1.10161	up
GO:0007155	cell adhesion	biological_process	4	0.808708	MSTRG.1268	Ccn2	cellular communication network factor 2 [Source:RGD Symbol;Acc:621392]	97.162	163.002	90.2827	62.7941	47.5404	55.8168	2.1092	1.0767	up
GO:0015031	protein transport	biological_process	9	0.819904	ENSRNOG00000002053	Fras1	Fraser extracellular matrix complex subunit 1 [Source:RGD Symbol;Acc:1306516]	0.139257	0.067374	0.065133	0.196717	0.15547	0.194714	0.496916	-1.00893	down
GO:0015031	protein transport	biological_process	9	0.819904	MSTRG.27243	Cd3g	CD3g molecule [Source:RGD Symbol;Acc:1307718]	3.1597	3.36923	1.43494	0.802837	0.611571	1.27998	2.95572	1.56351	up
GO:0008017	microtubule binding	molecular_function	7	0.824824	MSTRG.27342	Cryab	crystallin, alpha B [Source:RGD Symbol;Acc:2414]	4.40167	3.16475	1.93664	6.6383	11.8965	6.47058	0.380041	-1.39577	down
GO:0016787	hydrolase activity	molecular_function	4	0.843402	ENSRNOG00000018480	Capn9	calpain 9 [Source:RGD Symbol;Acc:70965]	0.16122	0.105673	0.226045	0.394335	0.248195	0.41808	0.464768	-1.10542	down
GO:0016787	hydrolase activity	molecular_function	4	0.843402	ENSRNOG00000026764	Pla2g4c	phospholipase A2 group IVC [Source:RGD Symbol;Acc:1594658]	0.486308	0.281544	0.148092	0.0390525	0.0591423	0.217515	2.90122	1.53666	up
GO:0016787	hydrolase activity	molecular_function	4	0.843402	MSTRG.10586	Rnase6	ribonuclease A family member k6 [Source:RGD Symbol;Acc:1303020]	2.74194	2.3303	1.68547	1.0146	0.903928	1.33617	2.0763	1.05401	up
GO:0016787	hydrolase activity	molecular_function	4	0.843402	MSTRG.10688	Cma1	chymase 1 [Source:RGD Symbol;Acc:2365]	4.6429	2.56201	3.59294	1.91197	1.46093	1.90488	2.04591	1.03274	up
GO:0016787	hydrolase activity	molecular_function	4	0.843402	MSTRG.23275	Ddi2	DNA damage inducible 1 homolog 2 [Source:RGD Symbol;Acc:1311815]	10.1342	3.79607	10.2228	3.09844	3.26578	3.1576	2.5366	1.34289	up
GO:0016787	hydrolase activity	molecular_function	4	0.843402	MSTRG.25663	Lyc2	lysozyme C type 2 [Source:RGD Symbol;Acc:1593616]	41.8054	26.3828	18.9251	18.5648	14.441	7.07027	2.1737	1.12015	up
GO:0016787	hydrolase activity	molecular_function	4	0.843402	MSTRG.26806	Mmp10	matrix metallopeptidase 10 [Source:RGD Symbol;Acc:620192]	0.65082	0.677513	0.764298	0.351474	0.357167	0.30782	2.05874	1.04176	up
GO:0000790	nuclear chromatin	cellular_component	7	0.847266	MSTRG.1247	RGD1559962	similar to High mobility group protein 2 (HMG-2) [Source:RGD Symbol;Acc:1559962]	2.0089	1.58098	1.57628	1.87562	4.21377	5.19355	0.457874	-1.12698	down
GO:0043547	positive regulation of GTPase activity	biological_process	8	0.853742	MSTRG.7866	Rack1	receptor for activated C kinase 1 [Source:RGD Symbol;Acc:69229]	2.12116	1.74372	0.700888	3.26988	5.21372	1.65053	0.450533	-1.15029	down
GO:0045944	positive regulation of transcription by RNA polymerase II	biological_process	10	0.857566	ENSRNOG00000005964	Nr4a3	nuclear receptor subfamily 4, group A, member 3 [Source:RGD Symbol;Acc:61882]	0.829097	0.535612	0.350647	0.270902	0.310903	0.258833	2.04054	1.02895	up
GO:0045944	positive regulation of transcription by RNA polymerase II	biological_process	10	0.857566	MSTRG.1247	RGD1559962	similar to High mobility group protein 2 (HMG-2) [Source:RGD Symbol;Acc:1559962]	2.0089	1.58098	1.57628	1.87562	4.21377	5.19355	0.457874	-1.12698	down
GO:0045944	positive regulation of transcription by RNA polymerase II	biological_process	10	0.857566	MSTRG.2394	Csrp3	cysteine and glycine rich protein 3 [Source:RGD Symbol;Acc:71092]	0.636871	1.03978	0.697614	1.76671	2.35583	1.56165	0.417697	-1.25947	down
GO:0045944	positive regulation of transcription by RNA polymerase II	biological_process	10	0.857566	MSTRG.3425	Irf7	interferon regulatory factor 7 [Source:RGD Symbol;Acc:1307828]	3.76225	5.28163	2.92289	1.06032	1.17443	1.60451	3.11694	1.64013	up
GO:0045944	positive regulation of transcription by RNA polymerase II	biological_process	10	0.857566	MSTRG.752	Morf4l2	mortality factor 4 like 2 [Source:RGD Symbol;Acc:1359471]	68.6344	76.9306	75.8236	18.1591	17.1081	17.1627	4.22256	2.07812	up
GO:0045944	positive regulation of transcription by RNA polymerase II	biological_process	10	0.857566	MSTRG.9802	Cytl1	cytokine like 1 [Source:RGD Symbol;Acc:1561846]	8.09952	20.2674	26.2093	6.62096	2.89882	3.34061	4.24375	2.08534	up
GO:0005694	chromosome	cellular_component	6	0.862947	MSTRG.1247	RGD1559962	similar to High mobility group protein 2 (HMG-2) [Source:RGD Symbol;Acc:1559962]	2.0089	1.58098	1.57628	1.87562	4.21377	5.19355	0.457874	-1.12698	down
GO:0008150	biological_process	biological_process	2	0.863484	ENSRNOG00000002053	Fras1	Fraser extracellular matrix complex subunit 1 [Source:RGD Symbol;Acc:1306516]	0.139257	0.067374	0.065133	0.196717	0.15547	0.194714	0.496916	-1.00893	down
GO:0008150	biological_process	biological_process	2	0.863484	ENSRNOG00000005008	Angpt4	angiopoietin 4 [Source:RGD Symbol;Acc:1307539]	0.957383	0.605696	0.869505	0.442478	0.367232	0.262644	2.26845	1.18171	up
GO:0008150	biological_process	biological_process	2	0.863484	ENSRNOG00000013053	Trpm6	transient receptor potential cation channel, subfamily M, member 6 [Source:RGD Symbol;Acc:1309942]	0.230886	0.220623	0.230274	0.013119	0.115142	0.093009	3.08123	1.6235	up
GO:0008150	biological_process	biological_process	2	0.863484	ENSRNOG00000018480	Capn9	calpain 9 [Source:RGD Symbol;Acc:70965]	0.16122	0.105673	0.226045	0.394335	0.248195	0.41808	0.464768	-1.10542	down
GO:0008150	biological_process	biological_process	2	0.863484	MSTRG.10586	Rnase6	ribonuclease A family member k6 [Source:RGD Symbol;Acc:1303020]	2.74194	2.3303	1.68547	1.0146	0.903928	1.33617	2.0763	1.05401	up
GO:0008150	biological_process	biological_process	2	0.863484	MSTRG.1247	RGD1559962	similar to High mobility group protein 2 (HMG-2) [Source:RGD Symbol;Acc:1559962]	2.0089	1.58098	1.57628	1.87562	4.21377	5.19355	0.457874	-1.12698	down
GO:0008150	biological_process	biological_process	2	0.863484	MSTRG.23291	LOC100362149	ribosomal protein S20-like [Source:RGD Symbol;Acc:2318734]	5.17524	3.97197	5.25486	4.70844	14.5374	10.2089	0.488957	-1.03222	down
GO:0008150	biological_process	biological_process	2	0.863484	MSTRG.28488	LOC100362684	ribosomal protein S20-like [Source:RGD Symbol;Acc:2324274]	4.34034	18.8852	4.45946	4.11471	2.30514	4.54696	2.52444	1.33596	up
GO:0008150	biological_process	biological_process	2	0.863484	MSTRG.752	Morf4l2	mortality factor 4 like 2 [Source:RGD Symbol;Acc:1359471]	68.6344	76.9306	75.8236	18.1591	17.1081	17.1627	4.22256	2.07812	up
GO:0001701	in utero embryonic development	biological_process	8	0.866851	MSTRG.10649	Myh6	myosin heavy chain 7 [Source:RGD Symbol;Acc:62030];myosin heavy chain 6 [Source:RGD Symbol;Acc:62029]	0.997238	1.06135	0.328905	1.69535	2.31046	1.00868	0.476118	-1.07061	down
GO:0007399	nervous system development	biological_process	6	0.866851	ENSRNOG00000008054	Igsf9	immunoglobulin superfamily, member 9 [Source:RGD Symbol;Acc:1304566]	0.292083	0.261639	0.287037	0.673067	0.658462	0.633483	0.427864	-1.22477	down
GO:0019904	protein domain specific binding	molecular_function	5	0.873419	MSTRG.1771	Tnni3	dynein, axonemal, assembly factor 3 [Source:RGD Symbol;Acc:2323487];troponin I3, cardiac type [Source:RGD Symbol;Acc:62052]	0.232226	0.361112	0.142345	0.656005	0.490498	0.460709	0.457739	-1.1274	down
GO:0031410	cytoplasmic vesicle	cellular_component	6	0.87417	MSTRG.10586	Rnase6	ribonuclease A family member k6 [Source:RGD Symbol;Acc:1303020]	2.74194	2.3303	1.68547	1.0146	0.903928	1.33617	2.0763	1.05401	up
GO:0031410	cytoplasmic vesicle	cellular_component	6	0.87417	MSTRG.29376	Igfbp2	insulin-like growth factor binding protein 2 [Source:RGD Symbol;Acc:2873]	0.073613	0.214964	0.510057	2.1311	1.26299	0.635682	0.198184	-2.33509	down
GO:0005524	ATP binding	molecular_function	5	0.87499	ENSRNOG00000013053	Trpm6	transient receptor potential cation channel, subfamily M, member 6 [Source:RGD Symbol;Acc:1309942]	0.230886	0.220623	0.230274	0.013119	0.115142	0.093009	3.08123	1.6235	up
GO:0005524	ATP binding	molecular_function	5	0.87499	ENSRNOG00000049282	Oas2	2'-5' oligoadenylate synthetase 2 [Source:RGD Symbol;Acc:1359697]	1.13584	0.796252	0.431963	0.36197	0.392657	0.369048	2.10386	1.07304	up
GO:0005524	ATP binding	molecular_function	5	0.87499	MSTRG.10649	Myh6	myosin heavy chain 7 [Source:RGD Symbol;Acc:62030];myosin heavy chain 6 [Source:RGD Symbol;Acc:62029]	0.997238	1.06135	0.328905	1.69535	2.31046	1.00868	0.476118	-1.07061	down
GO:0005524	ATP binding	molecular_function	5	0.87499	MSTRG.12982	AABR07028795		3.72587	3.84149	3.80138	1.79371	1.60476	1.97497	2.11573	1.08116	up
GO:0005524	ATP binding	molecular_function	5	0.87499	MSTRG.17011	Hspa1b	heat shock protein family A (Hsp70) member 1B [Source:RGD Symbol;Acc:2840]	5.24329	5.52474	2.7742	7.21687	11.7813	14.7747	0.40098	-1.3184	down
GO:0005524	ATP binding	molecular_function	5	0.87499	MSTRG.321	AABR07038029		1.34153	0.581293	1.06597	0.270944	0.433341	0.626478	2.24592	1.16731	up
GO:0005524	ATP binding	molecular_function	5	0.87499	MSTRG.6522	LOC680121	similar to heat shock protein 8 [Source:RGD Symbol;Acc:1595502]	30.1405	38.296	22.6258	32.113	23.1973	149.677	0.444234	-1.17061	down
GO:0007049	cell cycle	biological_process	4	0.877027	MSTRG.7866	Rack1	receptor for activated C kinase 1 [Source:RGD Symbol;Acc:69229]	2.12116	1.74372	0.700888	3.26988	5.21372	1.65053	0.450533	-1.15029	down
GO:0031625	ubiquitin protein ligase binding	molecular_function	7	0.879666	MSTRG.17011	Hspa1b	heat shock protein family A (Hsp70) member 1B [Source:RGD Symbol;Acc:2840]	5.24329	5.52474	2.7742	7.21687	11.7813	14.7747	0.40098	-1.3184	down
GO:0046872	metal ion binding	molecular_function	6	0.883645	ENSRNOG00000005964	Nr4a3	nuclear receptor subfamily 4, group A, member 3 [Source:RGD Symbol;Acc:61882]	0.829097	0.535612	0.350647	0.270902	0.310903	0.258833	2.04054	1.02895	up
GO:0046872	metal ion binding	molecular_function	6	0.883645	ENSRNOG00000013053	Trpm6	transient receptor potential cation channel, subfamily M, member 6 [Source:RGD Symbol;Acc:1309942]	0.230886	0.220623	0.230274	0.013119	0.115142	0.093009	3.08123	1.6235	up
GO:0046872	metal ion binding	molecular_function	6	0.883645	ENSRNOG00000018480	Capn9	calpain 9 [Source:RGD Symbol;Acc:70965]	0.16122	0.105673	0.226045	0.394335	0.248195	0.41808	0.464768	-1.10542	down
GO:0046872	metal ion binding	molecular_function	6	0.883645	ENSRNOG00000019500	Cyp1a1	cytochrome P450, family 1, subfamily a, polypeptide 1 [Source:RGD Symbol;Acc:2458]	0.03592	0.0001	0.081544	0.280251	0.378238	0.727885	0.0847996	-3.5598	down
GO:0046872	metal ion binding	molecular_function	6	0.883645	MSTRG.13940	Mt2A	metallothionein 2A [Source:RGD Symbol;Acc:1592345]	29.572	46.2534	20.3646	9.09823	9.9753	10.0336	3.30469	1.72452	up
GO:0046872	metal ion binding	molecular_function	6	0.883645	MSTRG.1771	Tnni3	dynein, axonemal, assembly factor 3 [Source:RGD Symbol;Acc:2323487];troponin I3, cardiac type [Source:RGD Symbol;Acc:62052]	0.232226	0.361112	0.142345	0.656005	0.490498	0.460709	0.457739	-1.1274	down
GO:0046872	metal ion binding	molecular_function	6	0.883645	MSTRG.19371	Nfs1	NFS1 cysteine desulfurase [Source:RGD Symbol;Acc:620912]	3.63526	0.0001	3.65634	0.0001	0.0001	0.0001	24305.7	14.569	up
GO:0046872	metal ion binding	molecular_function	6	0.883645	MSTRG.2394	Csrp3	cysteine and glycine rich protein 3 [Source:RGD Symbol;Acc:71092]	0.636871	1.03978	0.697614	1.76671	2.35583	1.56165	0.417697	-1.25947	down
GO:0046872	metal ion binding	molecular_function	6	0.883645	MSTRG.26806	Mmp10	matrix metallopeptidase 10 [Source:RGD Symbol;Acc:620192]	0.65082	0.677513	0.764298	0.351474	0.357167	0.30782	2.05874	1.04176	up
GO:0046872	metal ion binding	molecular_function	6	0.883645	MSTRG.27342	Cryab	crystallin, alpha B [Source:RGD Symbol;Acc:2414]	4.40167	3.16475	1.93664	6.6383	11.8965	6.47058	0.380041	-1.39577	down
GO:0046872	metal ion binding	molecular_function	6	0.883645	MSTRG.2963	AABR07005031		1.23131	1.57767	0.841578	3.18902	3.75164	4.00715	0.333451	-1.58445	down
GO:0046872	metal ion binding	molecular_function	6	0.883645	MSTRG.4999	Trim17	tripartite motif-containing 17 [Source:RGD Symbol;Acc:69290]	0.158453	0.186512	0.244611	0.471663	0.441507	0.741154	0.356386	-1.48849	down
GO:0046872	metal ion binding	molecular_function	6	0.883645	MSTRG.860	Rnf113a1	ring finger protein 113A1 [Source:RGD Symbol;Acc:1359693]	1.82938	1.04395	2.2839	0.897504	0.407751	0.592646	2.71734	1.44219	up
GO:0046982	protein heterodimerization activity	molecular_function	6	0.885606	MSTRG.27243	Cd3g	CD3g molecule [Source:RGD Symbol;Acc:1307718]	3.1597	3.36923	1.43494	0.802837	0.611571	1.27998	2.95572	1.56351	up
GO:0006811	ion transport	biological_process	6	0.886486	ENSRNOG00000013053	Trpm6	transient receptor potential cation channel, subfamily M, member 6 [Source:RGD Symbol;Acc:1309942]	0.230886	0.220623	0.230274	0.013119	0.115142	0.093009	3.08123	1.6235	up
GO:0006811	ion transport	biological_process	6	0.886486	ENSRNOG00000045816	Gria1	glutamate ionotropic receptor AMPA type subunit 1 [Source:RGD Symbol;Acc:621531]	0.153662	0.0781212	0.0762892	0.328888	0.272742	0.303107	0.34051	-1.55423	down
GO:0005743	mitochondrial inner membrane	cellular_component	6	0.88967	ENSRNOG00000019500	Cyp1a1	cytochrome P450, family 1, subfamily a, polypeptide 1 [Source:RGD Symbol;Acc:2458]	0.03592	0.0001	0.081544	0.280251	0.378238	0.727885	0.0847996	-3.5598	down
GO:0000976	transcription regulatory region sequence-specific DNA binding	molecular_function	8	0.890466	MSTRG.3425	Irf7	interferon regulatory factor 7 [Source:RGD Symbol;Acc:1307828]	3.76225	5.28163	2.92289	1.06032	1.17443	1.60451	3.11694	1.64013	up
GO:0005764	lysosome	cellular_component	8	0.900302	MSTRG.6522	LOC680121	similar to heat shock protein 8 [Source:RGD Symbol;Acc:1595502]	30.1405	38.296	22.6258	32.113	23.1973	149.677	0.444234	-1.17061	down
GO:0016607	nuclear speck	cellular_component	8	0.903847	MSTRG.17011	Hspa1b	heat shock protein family A (Hsp70) member 1B [Source:RGD Symbol;Acc:2840]	5.24329	5.52474	2.7742	7.21687	11.7813	14.7747	0.40098	-1.3184	down
GO:0098978	glutamatergic synapse	cellular_component	4	0.906593	ENSRNOG00000045816	Gria1	glutamate ionotropic receptor AMPA type subunit 1 [Source:RGD Symbol;Acc:621531]	0.153662	0.0781212	0.0762892	0.328888	0.272742	0.303107	0.34051	-1.55423	down
GO:0045892	negative regulation of transcription, DNA-templated	biological_process	9	0.909455	MSTRG.27342	Cryab	crystallin, alpha B [Source:RGD Symbol;Acc:2414]	4.40167	3.16475	1.93664	6.6383	11.8965	6.47058	0.380041	-1.39577	down
GO:0045892	negative regulation of transcription, DNA-templated	biological_process	9	0.909455	MSTRG.7077	Adipoq	adiponectin, C1Q and collagen domain containing [Source:RGD Symbol;Acc:628748]	1.56388	0.891889	1.23395	0.20421	0.211193	0.290087	5.23001	2.38681	up
GO:0000977	RNA polymerase II regulatory region sequence-specific DNA binding	molecular_function	9	0.910566	ENSRNOG00000005964	Nr4a3	nuclear receptor subfamily 4, group A, member 3 [Source:RGD Symbol;Acc:61882]	0.829097	0.535612	0.350647	0.270902	0.310903	0.258833	2.04054	1.02895	up
GO:0005739	mitochondrion	cellular_component	6	0.91362	ENSRNOG00000019500	Cyp1a1	cytochrome P450, family 1, subfamily a, polypeptide 1 [Source:RGD Symbol;Acc:2458]	0.03592	0.0001	0.081544	0.280251	0.378238	0.727885	0.0847996	-3.5598	down
GO:0005739	mitochondrion	cellular_component	6	0.91362	MSTRG.17011	Hspa1b	heat shock protein family A (Hsp70) member 1B [Source:RGD Symbol;Acc:2840]	5.24329	5.52474	2.7742	7.21687	11.7813	14.7747	0.40098	-1.3184	down
GO:0005739	mitochondrion	cellular_component	6	0.91362	MSTRG.27342	Cryab	crystallin, alpha B [Source:RGD Symbol;Acc:2414]	4.40167	3.16475	1.93664	6.6383	11.8965	6.47058	0.380041	-1.39577	down
GO:0005739	mitochondrion	cellular_component	6	0.91362	MSTRG.2812	Lipt2	lipoyl(octanoyl) transferase 2 [Source:RGD Symbol;Acc:1305211]	0.283157	0.506009	0.480529	0.88151	1.24304	0.745033	0.442466	-1.17636	down
GO:0005739	mitochondrion	cellular_component	6	0.91362	MSTRG.4039	Ifit3	interferon-induced protein with tetratricopeptide repeats 3 [Source:RGD Symbol;Acc:1359681]	4.97721	3.52241	3.21606	1.3741	1.53573	2.40418	2.20468	1.14057	up
GO:0005739	mitochondrion	cellular_component	6	0.91362	MSTRG.7866	Rack1	receptor for activated C kinase 1 [Source:RGD Symbol;Acc:69229]	2.12116	1.74372	0.700888	3.26988	5.21372	1.65053	0.450533	-1.15029	down
GO:0005783	endoplasmic reticulum	cellular_component	6	0.913884	ENSRNOG00000019500	Cyp1a1	cytochrome P450, family 1, subfamily a, polypeptide 1 [Source:RGD Symbol;Acc:2458]	0.03592	0.0001	0.081544	0.280251	0.378238	0.727885	0.0847996	-3.5598	down
GO:0005783	endoplasmic reticulum	cellular_component	6	0.913884	ENSRNOG00000045816	Gria1	glutamate ionotropic receptor AMPA type subunit 1 [Source:RGD Symbol;Acc:621531]	0.153662	0.0781212	0.0762892	0.328888	0.272742	0.303107	0.34051	-1.55423	down
GO:0005783	endoplasmic reticulum	cellular_component	6	0.913884	MSTRG.16024	Crabp2	cellular retinoic acid binding protein 2 [Source:RGD Symbol;Acc:62070]	2.61663	8.42398	7.11811	2.96094	3.12274	2.63796	2.08203	1.05799	up
GO:0005783	endoplasmic reticulum	cellular_component	6	0.913884	MSTRG.19016	Mal	mal, T-cell differentiation protein [Source:RGD Symbol;Acc:3037]	1.70514	1.76004	1.8063	0.88808	0.918323	0.823618	2.00435	1.00314	up
GO:0005783	endoplasmic reticulum	cellular_component	6	0.913884	MSTRG.7077	Adipoq	adiponectin, C1Q and collagen domain containing [Source:RGD Symbol;Acc:628748]	1.56388	0.891889	1.23395	0.20421	0.211193	0.290087	5.23001	2.38681	up
GO:0055114	oxidation-reduction process	biological_process	4	0.916689	ENSRNOG00000019500	Cyp1a1	cytochrome P450, family 1, subfamily a, polypeptide 1 [Source:RGD Symbol;Acc:2458]	0.03592	0.0001	0.081544	0.280251	0.378238	0.727885	0.0847996	-3.5598	down
GO:0055114	oxidation-reduction process	biological_process	4	0.916689	MSTRG.21596	Far2	fatty acyl CoA reductase 2 [Source:RGD Symbol;Acc:1565966]	4.70552	2.47182	3.21356	1.81247	1.36236	1.33524	2.30393	1.2041	up
GO:0055114	oxidation-reduction process	biological_process	4	0.916689	MSTRG.26667	Gpd1	glycerol-3-phosphate dehydrogenase 1 [Source:RGD Symbol;Acc:621381]	2.5	0.764599	1.04927	0.560462	0.529418	0.458827	2.78547	1.47792	up
GO:0016301	kinase activity	molecular_function	6	0.918049	ENSRNOG00000013053	Trpm6	transient receptor potential cation channel, subfamily M, member 6 [Source:RGD Symbol;Acc:1309942]	0.230886	0.220623	0.230274	0.013119	0.115142	0.093009	3.08123	1.6235	up
GO:0016301	kinase activity	molecular_function	6	0.918049	MSTRG.12982	AABR07028795		3.72587	3.84149	3.80138	1.79371	1.60476	1.97497	2.11573	1.08116	up
GO:0000139	Golgi membrane	cellular_component	7	0.921507	MSTRG.14059	Scoc	short coiled-coil protein [Source:RGD Symbol;Acc:1311860]	10.7525	4.35	10.9578	3.38544	3.16803	3.38759	2.62148	1.39038	up
GO:0016310	phosphorylation	biological_process	7	0.92365	ENSRNOG00000013053	Trpm6	transient receptor potential cation channel, subfamily M, member 6 [Source:RGD Symbol;Acc:1309942]	0.230886	0.220623	0.230274	0.013119	0.115142	0.093009	3.08123	1.6235	up
GO:0016310	phosphorylation	biological_process	7	0.92365	MSTRG.12982	AABR07028795		3.72587	3.84149	3.80138	1.79371	1.60476	1.97497	2.11573	1.08116	up
GO:0004674	protein serine/threonine kinase activity	molecular_function	8	0.926468	ENSRNOG00000013053	Trpm6	transient receptor potential cation channel, subfamily M, member 6 [Source:RGD Symbol;Acc:1309942]	0.230886	0.220623	0.230274	0.013119	0.115142	0.093009	3.08123	1.6235	up
GO:0005829	cytosol	cellular_component	6	0.927312	ENSRNOG00000015086	Plin1	perilipin 1 [Source:RGD Symbol;Acc:3351]	0.58075	0.293959	0.488433	0.106797	0.123819	0.12879	3.79277	1.92325	up
GO:0005829	cytosol	cellular_component	6	0.927312	ENSRNOG00000026764	Pla2g4c	phospholipase A2 group IVC [Source:RGD Symbol;Acc:1594658]	0.486308	0.281544	0.148092	0.0390525	0.0591423	0.217515	2.90122	1.53666	up
GO:0005829	cytosol	cellular_component	6	0.927312	ENSRNOG00000032728	LOC689230	similar to stefin A2 [Source:RGD Symbol;Acc:1594822]	0.669952	1.20217	0.384924	0.134809	0.198129	0.339906	3.35448	1.74609	up
GO:0005829	cytosol	cellular_component	6	0.927312	MSTRG.1268	Ccn2	cellular communication network factor 2 [Source:RGD Symbol;Acc:621392]	97.162	163.002	90.2827	62.7941	47.5404	55.8168	2.1092	1.0767	up
GO:0005829	cytosol	cellular_component	6	0.927312	MSTRG.14059	Scoc	short coiled-coil protein [Source:RGD Symbol;Acc:1311860]	10.7525	4.35	10.9578	3.38544	3.16803	3.38759	2.62148	1.39038	up
GO:0005829	cytosol	cellular_component	6	0.927312	MSTRG.16024	Crabp2	cellular retinoic acid binding protein 2 [Source:RGD Symbol;Acc:62070]	2.61663	8.42398	7.11811	2.96094	3.12274	2.63796	2.08203	1.05799	up
GO:0005829	cytosol	cellular_component	6	0.927312	MSTRG.17011	Hspa1b	heat shock protein family A (Hsp70) member 1B [Source:RGD Symbol;Acc:2840]	5.24329	5.52474	2.7742	7.21687	11.7813	14.7747	0.40098	-1.3184	down
GO:0005829	cytosol	cellular_component	6	0.927312	MSTRG.25662	Frs2	fibroblast growth factor receptor substrate 2 [Source:RGD Symbol;Acc:1308201]	1.85463	2.23289	2.7624	1.887	8.46212	8.22208	0.368846	-1.43891	down
GO:0005829	cytosol	cellular_component	6	0.927312	MSTRG.26667	Gpd1	glycerol-3-phosphate dehydrogenase 1 [Source:RGD Symbol;Acc:621381]	2.5	0.764599	1.04927	0.560462	0.529418	0.458827	2.78547	1.47792	up
GO:0005829	cytosol	cellular_component	6	0.927312	MSTRG.27243	Cd3g	CD3g molecule [Source:RGD Symbol;Acc:1307718]	3.1597	3.36923	1.43494	0.802837	0.611571	1.27998	2.95572	1.56351	up
GO:0005829	cytosol	cellular_component	6	0.927312	MSTRG.27342	Cryab	crystallin, alpha B [Source:RGD Symbol;Acc:2414]	4.40167	3.16475	1.93664	6.6383	11.8965	6.47058	0.380041	-1.39577	down
GO:0005829	cytosol	cellular_component	6	0.927312	MSTRG.3425	Irf7	interferon regulatory factor 7 [Source:RGD Symbol;Acc:1307828]	3.76225	5.28163	2.92289	1.06032	1.17443	1.60451	3.11694	1.64013	up
GO:0005829	cytosol	cellular_component	6	0.927312	MSTRG.4039	Ifit3	interferon-induced protein with tetratricopeptide repeats 3 [Source:RGD Symbol;Acc:1359681]	4.97721	3.52241	3.21606	1.3741	1.53573	2.40418	2.20468	1.14057	up
GO:0005829	cytosol	cellular_component	6	0.927312	MSTRG.6522	LOC680121	similar to heat shock protein 8 [Source:RGD Symbol;Acc:1595502]	30.1405	38.296	22.6258	32.113	23.1973	149.677	0.444234	-1.17061	down
GO:0005829	cytosol	cellular_component	6	0.927312	MSTRG.6911	AABR07034362	stefin A2 [Source:RGD Symbol;Acc:1562186]	12.1028	7.72974	9.06158	1.16056	2.96199	6.42592	2.73918	1.45374	up
GO:0005829	cytosol	cellular_component	6	0.927312	MSTRG.7866	Rack1	receptor for activated C kinase 1 [Source:RGD Symbol;Acc:69229]	2.12116	1.74372	0.700888	3.26988	5.21372	1.65053	0.450533	-1.15029	down
GO:0008134	transcription factor binding	molecular_function	5	0.928571	MSTRG.1247	RGD1559962	similar to High mobility group protein 2 (HMG-2) [Source:RGD Symbol;Acc:1559962]	2.0089	1.58098	1.57628	1.87562	4.21377	5.19355	0.457874	-1.12698	down
GO:0000978	RNA polymerase II cis-regulatory region sequence-specific DNA binding	molecular_function	10	0.931384	ENSRNOG00000005964	Nr4a3	nuclear receptor subfamily 4, group A, member 3 [Source:RGD Symbol;Acc:61882]	0.829097	0.535612	0.350647	0.270902	0.310903	0.258833	2.04054	1.02895	up
GO:0000978	RNA polymerase II cis-regulatory region sequence-specific DNA binding	molecular_function	10	0.931384	MSTRG.3425	Irf7	interferon regulatory factor 7 [Source:RGD Symbol;Acc:1307828]	3.76225	5.28163	2.92289	1.06032	1.17443	1.60451	3.11694	1.64013	up
GO:0006468	protein phosphorylation	biological_process	9	0.932197	ENSRNOG00000013053	Trpm6	transient receptor potential cation channel, subfamily M, member 6 [Source:RGD Symbol;Acc:1309942]	0.230886	0.220623	0.230274	0.013119	0.115142	0.093009	3.08123	1.6235	up
GO:0006468	protein phosphorylation	biological_process	9	0.932197	MSTRG.321	AABR07038029		1.34153	0.581293	1.06597	0.270944	0.433341	0.626478	2.24592	1.16731	up
GO:0006915	apoptotic process	biological_process	6	0.932601	MSTRG.7866	Rack1	receptor for activated C kinase 1 [Source:RGD Symbol;Acc:69229]	2.12116	1.74372	0.700888	3.26988	5.21372	1.65053	0.450533	-1.15029	down
GO:0006974	cellular response to DNA damage stimulus	biological_process	6	0.933088	MSTRG.752	Morf4l2	mortality factor 4 like 2 [Source:RGD Symbol;Acc:1359471]	68.6344	76.9306	75.8236	18.1591	17.1081	17.1627	4.22256	2.07812	up
GO:0045893	positive regulation of transcription, DNA-templated	biological_process	9	0.934969	ENSRNOG00000005964	Nr4a3	nuclear receptor subfamily 4, group A, member 3 [Source:RGD Symbol;Acc:61882]	0.829097	0.535612	0.350647	0.270902	0.310903	0.258833	2.04054	1.02895	up
GO:0045893	positive regulation of transcription, DNA-templated	biological_process	9	0.934969	MSTRG.3425	Irf7	interferon regulatory factor 7 [Source:RGD Symbol;Acc:1307828]	3.76225	5.28163	2.92289	1.06032	1.17443	1.60451	3.11694	1.64013	up
GO:0035556	intracellular signal transduction	biological_process	5	0.945405	MSTRG.1268	Ccn2	cellular communication network factor 2 [Source:RGD Symbol;Acc:621392]	97.162	163.002	90.2827	62.7941	47.5404	55.8168	2.1092	1.0767	up
GO:0000166	nucleotide binding	molecular_function	5	0.955651	ENSRNOG00000001959	Mx1	myxovirus (influenza virus) resistance 1 [Source:RGD Symbol;Acc:3127]	1.36213	1.98217	0.602343	0.390254	0.481713	0.904944	2.22107	1.15126	up
GO:0000166	nucleotide binding	molecular_function	5	0.955651	MSTRG.10649	Myh6	myosin heavy chain 7 [Source:RGD Symbol;Acc:62030];myosin heavy chain 6 [Source:RGD Symbol;Acc:62029]	0.997238	1.06135	0.328905	1.69535	2.31046	1.00868	0.476118	-1.07061	down
GO:0000166	nucleotide binding	molecular_function	5	0.955651	MSTRG.12982	AABR07028795		3.72587	3.84149	3.80138	1.79371	1.60476	1.97497	2.11573	1.08116	up
GO:0000166	nucleotide binding	molecular_function	5	0.955651	MSTRG.17011	Hspa1b	heat shock protein family A (Hsp70) member 1B [Source:RGD Symbol;Acc:2840]	5.24329	5.52474	2.7742	7.21687	11.7813	14.7747	0.40098	-1.3184	down
GO:0000166	nucleotide binding	molecular_function	5	0.955651	MSTRG.321	AABR07038029		1.34153	0.581293	1.06597	0.270944	0.433341	0.626478	2.24592	1.16731	up
GO:0000166	nucleotide binding	molecular_function	5	0.955651	MSTRG.6522	LOC680121	similar to heat shock protein 8 [Source:RGD Symbol;Acc:1595502]	30.1405	38.296	22.6258	32.113	23.1973	149.677	0.444234	-1.17061	down
GO:0016740	transferase activity	molecular_function	4	0.95576	ENSRNOG00000013053	Trpm6	transient receptor potential cation channel, subfamily M, member 6 [Source:RGD Symbol;Acc:1309942]	0.230886	0.220623	0.230274	0.013119	0.115142	0.093009	3.08123	1.6235	up
GO:0016740	transferase activity	molecular_function	4	0.95576	ENSRNOG00000049282	Oas2	2'-5' oligoadenylate synthetase 2 [Source:RGD Symbol;Acc:1359697]	1.13584	0.796252	0.431963	0.36197	0.392657	0.369048	2.10386	1.07304	up
GO:0016740	transferase activity	molecular_function	4	0.95576	MSTRG.12982	AABR07028795		3.72587	3.84149	3.80138	1.79371	1.60476	1.97497	2.11573	1.08116	up
GO:0016740	transferase activity	molecular_function	4	0.95576	MSTRG.2812	Lipt2	lipoyl(octanoyl) transferase 2 [Source:RGD Symbol;Acc:1305211]	0.283157	0.506009	0.480529	0.88151	1.24304	0.745033	0.442466	-1.17636	down
GO:0016740	transferase activity	molecular_function	4	0.95576	MSTRG.4999	Trim17	tripartite motif-containing 17 [Source:RGD Symbol;Acc:69290]	0.158453	0.186512	0.244611	0.471663	0.441507	0.741154	0.356386	-1.48849	down
GO:0005768	endosome	cellular_component	7	0.958896	MSTRG.14059	Scoc	short coiled-coil protein [Source:RGD Symbol;Acc:1311860]	10.7525	4.35	10.9578	3.38544	3.16803	3.38759	2.62148	1.39038	up
GO:1990837	sequence-specific double-stranded DNA binding	molecular_function	8	0.962612	MSTRG.3425	Irf7	interferon regulatory factor 7 [Source:RGD Symbol;Acc:1307828]	3.76225	5.28163	2.92289	1.06032	1.17443	1.60451	3.11694	1.64013	up
GO:0000981	DNA-binding transcription factor activity, RNA polymerase II-specific	molecular_function	5	0.964212	MSTRG.3425	Irf7	interferon regulatory factor 7 [Source:RGD Symbol;Acc:1307828]	3.76225	5.28163	2.92289	1.06032	1.17443	1.60451	3.11694	1.64013	up
GO:0001228	DNA-binding transcription activator activity, RNA polymerase II-specific	molecular_function	6	0.96473	ENSRNOG00000005964	Nr4a3	nuclear receptor subfamily 4, group A, member 3 [Source:RGD Symbol;Acc:61882]	0.829097	0.535612	0.350647	0.270902	0.310903	0.258833	2.04054	1.02895	up
GO:0044877	protein-containing complex binding	molecular_function	4	0.965241	MSTRG.27342	Cryab	crystallin, alpha B [Source:RGD Symbol;Acc:2414]	4.40167	3.16475	1.93664	6.6383	11.8965	6.47058	0.380041	-1.39577	down
GO:0003700	DNA-binding transcription factor activity	molecular_function	4	0.968881	ENSRNOG00000005964	Nr4a3	nuclear receptor subfamily 4, group A, member 3 [Source:RGD Symbol;Acc:61882]	0.829097	0.535612	0.350647	0.270902	0.310903	0.258833	2.04054	1.02895	up
GO:0003700	DNA-binding transcription factor activity	molecular_function	4	0.968881	MSTRG.3425	Irf7	interferon regulatory factor 7 [Source:RGD Symbol;Acc:1307828]	3.76225	5.28163	2.92289	1.06032	1.17443	1.60451	3.11694	1.64013	up
GO:0005813	centrosome	cellular_component	7	0.970396	MSTRG.17011	Hspa1b	heat shock protein family A (Hsp70) member 1B [Source:RGD Symbol;Acc:2840]	5.24329	5.52474	2.7742	7.21687	11.7813	14.7747	0.40098	-1.3184	down
GO:0008284	positive regulation of cell population proliferation	biological_process	7	0.974792	MSTRG.1268	Ccn2	cellular communication network factor 2 [Source:RGD Symbol;Acc:621392]	97.162	163.002	90.2827	62.7941	47.5404	55.8168	2.1092	1.0767	up
GO:0042995	cell projection	cellular_component	4	0.977078	MSTRG.7866	Rack1	receptor for activated C kinase 1 [Source:RGD Symbol;Acc:69229]	2.12116	1.74372	0.700888	3.26988	5.21372	1.65053	0.450533	-1.15029	down
GO:0043231	intracellular membrane-bounded organelle	cellular_component	5	0.978204	ENSRNOG00000019500	Cyp1a1	cytochrome P450, family 1, subfamily a, polypeptide 1 [Source:RGD Symbol;Acc:2458]	0.03592	0.0001	0.081544	0.280251	0.378238	0.727885	0.0847996	-3.5598	down
GO:0043231	intracellular membrane-bounded organelle	cellular_component	5	0.978204	MSTRG.21596	Far2	fatty acyl CoA reductase 2 [Source:RGD Symbol;Acc:1565966]	4.70552	2.47182	3.21356	1.81247	1.36236	1.33524	2.30393	1.2041	up
GO:0003682	chromatin binding	molecular_function	4	0.978695	MSTRG.1247	RGD1559962	similar to High mobility group protein 2 (HMG-2) [Source:RGD Symbol;Acc:1559962]	2.0089	1.58098	1.57628	1.87562	4.21377	5.19355	0.457874	-1.12698	down
GO:0004672	protein kinase activity	molecular_function	7	0.979158	MSTRG.321	AABR07038029		1.34153	0.581293	1.06597	0.270944	0.433341	0.626478	2.24592	1.16731	up
GO:0006355	regulation of transcription, DNA-templated	biological_process	8	0.981469	ENSRNOG00000005964	Nr4a3	nuclear receptor subfamily 4, group A, member 3 [Source:RGD Symbol;Acc:61882]	0.829097	0.535612	0.350647	0.270902	0.310903	0.258833	2.04054	1.02895	up
GO:0006355	regulation of transcription, DNA-templated	biological_process	8	0.981469	MSTRG.1247	RGD1559962	similar to High mobility group protein 2 (HMG-2) [Source:RGD Symbol;Acc:1559962]	2.0089	1.58098	1.57628	1.87562	4.21377	5.19355	0.457874	-1.12698	down
GO:0006355	regulation of transcription, DNA-templated	biological_process	8	0.981469	MSTRG.3425	Irf7	interferon regulatory factor 7 [Source:RGD Symbol;Acc:1307828]	3.76225	5.28163	2.92289	1.06032	1.17443	1.60451	3.11694	1.64013	up
GO:0006355	regulation of transcription, DNA-templated	biological_process	8	0.981469	MSTRG.752	Morf4l2	mortality factor 4 like 2 [Source:RGD Symbol;Acc:1359471]	68.6344	76.9306	75.8236	18.1591	17.1081	17.1627	4.22256	2.07812	up
GO:0000122	negative regulation of transcription by RNA polymerase II	biological_process	10	0.98162	ENSRNOG00000005964	Nr4a3	nuclear receptor subfamily 4, group A, member 3 [Source:RGD Symbol;Acc:61882]	0.829097	0.535612	0.350647	0.270902	0.310903	0.258833	2.04054	1.02895	up
GO:0000122	negative regulation of transcription by RNA polymerase II	biological_process	10	0.98162	ENSRNOG00000014815	Myoz2	myozenin 2 [Source:RGD Symbol;Acc:1307669]	0.089599	0.566478	0.085301	1.18754	1.33308	0.76693	0.225511	-2.14873	down
GO:0055085	transmembrane transport	biological_process	6	0.982259	ENSRNOG00000013053	Trpm6	transient receptor potential cation channel, subfamily M, member 6 [Source:RGD Symbol;Acc:1309942]	0.230886	0.220623	0.230274	0.013119	0.115142	0.093009	3.08123	1.6235	up
GO:0005887	integral component of plasma membrane	cellular_component	6	0.988904	ENSRNOG00000000873	Brs3	bombesin receptor subtype 3 [Source:RGD Symbol;Acc:628645]	0.684856	0.476728	0.325205	0.138879	0.100965	0.373652	2.42347	1.27707	up
GO:0005887	integral component of plasma membrane	cellular_component	6	0.988904	ENSRNOG00000001926	Cldn1	claudin 1 [Source:RGD Symbol;Acc:68422]	0.488957	0.588734	0.237891	0.155539	0.268818	0.188699	2.14594	1.10161	up
GO:0043565	sequence-specific DNA binding	molecular_function	7	0.989846	ENSRNOG00000005964	Nr4a3	nuclear receptor subfamily 4, group A, member 3 [Source:RGD Symbol;Acc:61882]	0.829097	0.535612	0.350647	0.270902	0.310903	0.258833	2.04054	1.02895	up
GO:0006357	regulation of transcription by RNA polymerase II	biological_process	9	0.990772	MSTRG.1247	RGD1559962	similar to High mobility group protein 2 (HMG-2) [Source:RGD Symbol;Acc:1559962]	2.0089	1.58098	1.57628	1.87562	4.21377	5.19355	0.457874	-1.12698	down
GO:0005789	endoplasmic reticulum membrane	cellular_component	5	0.991737	ENSRNOG00000019500	Cyp1a1	cytochrome P450, family 1, subfamily a, polypeptide 1 [Source:RGD Symbol;Acc:2458]	0.03592	0.0001	0.081544	0.280251	0.378238	0.727885	0.0847996	-3.5598	down
GO:0005730	nucleolus	cellular_component	6	0.992974	MSTRG.752	Morf4l2	mortality factor 4 like 2 [Source:RGD Symbol;Acc:1359471]	68.6344	76.9306	75.8236	18.1591	17.1081	17.1627	4.22256	2.07812	up
GO:0003674	molecular_function	molecular_function	2	0.9949	ENSRNOG00000002053	Fras1	Fraser extracellular matrix complex subunit 1 [Source:RGD Symbol;Acc:1306516]	0.139257	0.067374	0.065133	0.196717	0.15547	0.194714	0.496916	-1.00893	down
GO:0003674	molecular_function	molecular_function	2	0.9949	ENSRNOG00000005008	Angpt4	angiopoietin 4 [Source:RGD Symbol;Acc:1307539]	0.957383	0.605696	0.869505	0.442478	0.367232	0.262644	2.26845	1.18171	up
GO:0003674	molecular_function	molecular_function	2	0.9949	ENSRNOG00000018480	Capn9	calpain 9 [Source:RGD Symbol;Acc:70965]	0.16122	0.105673	0.226045	0.394335	0.248195	0.41808	0.464768	-1.10542	down
GO:0003674	molecular_function	molecular_function	2	0.9949	MSTRG.10586	Rnase6	ribonuclease A family member k6 [Source:RGD Symbol;Acc:1303020]	2.74194	2.3303	1.68547	1.0146	0.903928	1.33617	2.0763	1.05401	up
GO:0003674	molecular_function	molecular_function	2	0.9949	MSTRG.1247	RGD1559962	similar to High mobility group protein 2 (HMG-2) [Source:RGD Symbol;Acc:1559962]	2.0089	1.58098	1.57628	1.87562	4.21377	5.19355	0.457874	-1.12698	down
GO:0003674	molecular_function	molecular_function	2	0.9949	MSTRG.17011	Hspa1b	heat shock protein family A (Hsp70) member 1B [Source:RGD Symbol;Acc:2840]	5.24329	5.52474	2.7742	7.21687	11.7813	14.7747	0.40098	-1.3184	down
[truncated: 137 more rows]
