# Supplementary material for: Whole-transcriptome sequencing and ceRNA interaction network of temporomandibular joint osteoarthritis
Source: Front Genet. 2022 Oct 5;13:962574. doi: 10.3389/fgene.2022.962574 (PMC9581126; doi:10.3389/fgene.2022.962574)
Supplement: Supplementary file 7 [file Table5.XLSX]

## Sheet: Sheet1
pathway_id	pathway_name	Genes	S gene number	TS gene number	B gene number	TB gene number	pvalue
ko04962	Vasopressin-regulated water reabsorption	Dync1h1;Dync1i2;Dync1li2;Rab5b	4	83	48	5988	0.00420149
ko00514	Other types of O-glycan biosynthesis	Gxylt1;Ogt;St6gal1	3	83	24	5988	0.00421289
ko04144	Endocytosis	Arfgap1;Cltb;Fgfr3;Igf2r;Kif5a;Nedd4;Pml;Rab5b;Vps37c	9	83	285	5988	0.0164942
ko05132	Salmonella infection	Dync1h1;Dync1i2;Dync1li2;Klc2	4	83	91	5988	0.0369415
ko04145	Phagosome	Atp6v1a;Dync1h1;Dync1i2;Dync1li2;Rab5b;Tlr6	6	83	186	5988	0.0435168
ko04120	Ubiquitin mediated proteolysis	Birc2;Cul1;Nedd4;Pml;Ube2o	5	83	148	5988	0.0538224
ko05412	Arrhythmogenic right ventricular cardiomyopathy (ARVC)	Cdh2;Dag1;Itgb4	3	83	65	5988	0.0607523
ko04668	TNF signaling pathway	Birc2;Dnm1l;Mmp3;Rps6ka5	4	83	114	5988	0.072899
ko04512	ECM-receptor interaction	Dag1;Itgb4;NEWGENE_621351	3	83	75	5988	0.0852628
ko04710	Circadian rhythm	Cul1;Fbxl3	2	83	38	5988	0.0968888
ko00440	Phosphonate and phosphinate metabolism	Chpt1	1	83	8	5988	0.105714
ko04530	Tight junction	Actn1;Cttn;Mpp5;Myh9l1;Nedd4	5	83	187	5988	0.116865
ko04122	Sulfur relay system	Nfs1	1	83	9	5988	0.118127
ko04215	Apoptosis - multiple species	Bid;Birc2	2	83	43	5988	0.119159
ko05146	Amoebiasis	Actn1;NEWGENE_621351;Rab5b	3	83	89	5988	0.12539
ko01524	Platinum drug resistance	Bid;Birc2;Top2a	3	83	94	5988	0.141125
ko05219	Bladder cancer	Fgfr3;Rps6ka5	2	83	51	5988	0.157025
ko00330	Arginine and proline metabolism	P4ha2	2	83	52	5988	0.161911
ko05231	Choline metabolism in cancer	Chpt1;Ralgds;Slc22a5	3	83	108	5988	0.188313
ko04810	Regulation of actin cytoskeleton	Actn1;Arhgef7;Enah;Fgfr3;Itgb4	5	83	221	5988	0.191232
ko00730	Thiamine metabolism	Nfs1	1	83	16	5988	0.200373
ko00511	Other glycan degradation	Gba2	1	83	19	5988	0.233258
ko00532	Glycosaminoglycan biosynthesis - chondroitin sulfate / dermatan sulfate	Dse	1	83	20	5988	0.243919
ko05016	Huntington disease	Atp5mc2;Cltb;Hap1;Nrf1	4	83	190	5988	0.269382
ko00900	Terpenoid backbone biosynthesis	Ggps1	1	83	23	5988	0.275033
ko00563	Glycosylphosphatidylinositol (GPI)-anchor biosynthesis	Pigc	1	83	24	5988	0.285121
ko05416	Viral myocarditis	Bid;Dag1	2	83	77	5988	0.289273
ko04217	Necroptosis	Bid;Birc2;Dnm1l	3	83	136	5988	0.291622
ko05100	Bacterial invasion of epithelial cells	Cltb;Cttn	2	83	79	5988	0.299581
ko03040	Spliceosome	Dhx15;Hnrnpu;Sf3b3	3	83	139	5988	0.303053
ko00515	Mannose type O-glycan biosynthesis	Pomgnt2	1	83	27	5988	0.314559
ko04360	Axon guidance	Enah;Epha5;Rgs3;Sema4c	4	83	206	5988	0.319523
ko05410	Hypertrophic cardiomyopathy (HCM)	Dag1;Itgb4	2	83	83	5988	0.320126
ko05414	Dilated cardiomyopathy (DCM)	Dag1;Itgb4	2	83	84	5988	0.325242
ko04510	Focal adhesion	Actn1;Birc2;Itgb4;NEWGENE_621351	4	83	209	5988	0.329036
ko05200	Pathways in cancer	Bid;Birc2;Cul1;Egln2;Fgfr3;Ncoa4;Pml;Ralgds;Rps6ka5	9	83	545	5988	0.341844
ko04392	Hippo signaling pathway - multiple species	Tead3	1	83	31	5988	0.351954
ko04210	Apoptosis	Bid;Birc2;Sptan1	3	83	152	5988	0.352737
ko04721	Synaptic vesicle cycle	Atp6v1a;Cltb	2	83	90	5988	0.355719
ko05323	Rheumatoid arthritis	Atp6v1a;Mmp3	2	83	96	5988	0.385715
ko04621	NOD-like receptor signaling pathway	Birc2;Dnm1l;Nlrp1a	3	83	161	5988	0.386974
ko05206	MicroRNAs in cancer	Dnmt3a;Fgfr3;Rps6ka5	3	83	162	5988	0.390758
ko04390	Hippo signaling pathway	Birc2;Mpp5;Tead3	3	83	165	5988	0.402074
ko04966	Collecting duct acid secretion	Atp6v1a	1	83	37	5988	0.404299
ko03440	Homologous recombination	Blm	1	83	39	5988	0.420801
ko05340	Primary immunodeficiency	Ptprc	1	83	41	5988	0.436852
ko03460	Fanconi anemia pathway	Blm	1	83	41	5988	0.436852
ko04014	Ras signaling pathway	Exoc2;Fgfr3;Rab5b;Ralgds	4	83	243	5988	0.43686
ko04978	Mineral absorption	Steap2	1	83	42	5988	0.444711
ko05216	Thyroid cancer	Ncoa4	1	83	43	5988	0.452463
ko04216	Ferroptosis	Ncoa4	1	83	44	5988	0.460107
ko05202	Transcriptional misregulation in cancer	Mef2c;Mmp3;Pml	3	83	182	5988	0.464948
ko00565	Ether lipid metabolism	Chpt1	1	83	45	5988	0.467646
ko04340	Hedgehog signaling pathway	Cul1	1	83	47	5988	0.482413
ko00380	Tryptophan metabolism	Cyp1a1	1	83	47	5988	0.482413
ko03022	Basal transcription factors	Gtf2i	1	83	47	5988	0.482413
ko05152	Tuberculosis	Bid;Rab5b;Tlr6	3	83	187	5988	0.482926
ko04961	Endocrine and other factor-regulated calcium reabsorption	Cltb	1	83	49	5988	0.496775
ko04913	Ovarian steroidogenesis	Cyp1a1	1	83	50	5988	0.503808
ko00270	Cysteine and methionine metabolism	Dnmt3a	1	83	53	5988	0.524329
ko04930	Type II diabetes mellitus	Adipoq	1	83	53	5988	0.524329
ko04611	Platelet activation	NEWGENE_621351;Stim1	2	83	127	5988	0.529312
ko05165	Human papillomavirus infection	Atp6v1a;Itgb4;Mpp5;Mx2;NEWGENE_621351	5	83	347	5988	0.530906
ko00510	N-Glycan biosynthesis	St6gal1	1	83	56	5988	0.544011
ko00600	Sphingolipid metabolism	Gba2	1	83	57	5988	0.550391
ko00190	Oxidative phosphorylation	Atp5mc2;Atp6v1a	2	83	133	5988	0.554444
ko04722	Neurotrophin signaling pathway	Irak3;Rps6ka5	2	83	134	5988	0.558541
ko04142	Lysosome	Cltb;Igf2r	2	83	137	5988	0.570675
ko04371	Apelin signaling pathway	Mef2c;Nrf1	2	83	138	5988	0.574666
ko00980	Metabolism of xenobiotics by cytochrome P450	Cyp1a1	1	83	61	5988	0.575042
ko04071	Sphingolipid signaling pathway	Bid;S1pr3	2	83	139	5988	0.578632
ko05014	Amyotrophic lateral sclerosis (ALS)	Bid	1	83	63	5988	0.586861
ko00830	Retinol metabolism	Cyp1a1	1	83	65	5988	0.598356
ko05168	Herpes simplex virus 1 infection	Bid;Birc2;Pml;Zfp382	4	83	299	5988	0.601229
ko05162	Measles	Bid;Mx2	2	83	145	5988	0.601864
ko05230	Central carbon metabolism in cancer	Fgfr3	1	83	68	5988	0.615008
ko00140	Steroid hormone biosynthesis	Cyp1a1	1	83	68	5988	0.615008
ko05221	Acute myeloid leukemia	Pml	1	83	71	5988	0.630978
ko05211	Renal cell carcinoma	Egln2	1	83	73	5988	0.641259
ko05322	Systemic lupus erythematosus	Actn1	1	83	74	5988	0.646293
ko04974	Protein digestion and absorption	NEWGENE_621351	1	83	74	5988	0.646293
ko04932	Non-alcoholic fatty liver disease (NAFLD)	Adipoq;Bid	2	83	158	5988	0.648908
ko03013	RNA transport	Eif3j;Eif4ebp3	2	83	160	5988	0.655749
ko05160	Hepatitis C	Bid;Mx2	2	83	161	5988	0.659129
ko05204	Chemical carcinogenesis	Cyp1a1	1	83	77	5988	0.66098
ko04310	Wnt signaling pathway	Cul1;Ror2	2	83	165	5988	0.672392
ko05164	Influenza A	Mx2;Pml	2	83	167	5988	0.678867
ko04115	p53 signaling pathway	Bid	1	83	81	5988	0.679629
ko04920	Adipocytokine signaling pathway	Adipoq	1	83	82	5988	0.68413
ko04520	Adherens junction	Actn1	1	83	83	5988	0.688569
ko03320	PPAR signaling pathway	Adipoq	1	83	85	5988	0.697263
ko04514	Cell adhesion molecules (CAMs)	Cdh2;Ptprc	2	83	173	5988	0.69768
ko04146	Peroxisome	Crot	1	83	86	5988	0.70152
ko04141	Protein processing in endoplasmic reticulum	Cul1;Sil1	2	83	177	5988	0.709717
ko04064	NF-kappa B signaling pathway	Birc2	1	83	89	5988	0.713938
ko04350	TGF-beta signaling pathway	Cul1	1	83	90	5988	0.717963
ko03015	mRNA surveillance pathway	Msi1	1	83	90	5988	0.717963
ko05010	Alzheimer disease	Atp5mc2;Bid	2	83	180	5988	0.718484
ko05212	Pancreatic cancer	Ralgds	1	83	91	5988	0.721932
ko04620	Toll-like receptor signaling pathway	Tlr6	1	83	92	5988	0.725846
ko04657	IL-17 signaling pathway	Mmp3	1	83	92	5988	0.725846
ko01521	EGFR tyrosine kinase inhibitor resistance	Fgfr3	1	83	93	5988	0.729705
ko04022	cGMP-PKG signaling pathway	Gtf2i;Mef2c	2	83	185	5988	0.732608
ko05222	Small cell lung cancer	Birc2	1	83	97	5988	0.744613
ko05210	Colorectal cancer	Ralgds	1	83	99	5988	0.75176
ko04211	Longevity regulating pathway	Adipoq	1	83	100	5988	0.755258
ko04666	Fc gamma R-mediated phagocytosis	Ptprc	1	83	100	5988	0.755258
ko04727	GABAergic synapse	Hap1	1	83	100	5988	0.755258
ko00564	Glycerophospholipid metabolism	Chpt1	1	83	101	5988	0.758708
ko05142	Chagas disease (American trypanosomiasis)	Tlr6	1	83	102	5988	0.76211
ko04713	Circadian entrainment	Rps6ka5	1	83	109	5988	0.784633
ko05215	Prostate cancer	Mmp3	1	83	111	5988	0.790671
ko04670	Leukocyte transendothelial migration	Actn1	1	83	113	5988	0.796543
ko04066	HIF-1 signaling pathway	Egln2	1	83	113	5988	0.796543
ko04660	T cell receptor signaling pathway	Ptprc	1	83	113	5988	0.796543
ko04015	Rap1 signaling pathway	Fgfr3;Ralgds	2	83	211	5988	0.796787
ko04933	AGE-RAGE signaling pathway in diabetic complications	NEWGENE_621351	1	83	114	5988	0.799417
ko04931	Insulin resistance	Ogt	1	83	118	5988	0.810519
ko04928	Parathyroid hormone synthesis, secretion and action	Mef2c	1	83	118	5988	0.810519
ko05145	Toxoplasmosis	Birc2	1	83	119	5988	0.813198
ko04919	Thyroid hormone signaling pathway	Med13	1	83	119	5988	0.813198
ko04650	Natural killer cell mediated cytotoxicity	Bid	1	83	121	5988	0.818445
ko04114	Oocyte meiosis	Cul1	1	83	122	5988	0.821013
ko05169	Epstein-Barr virus infection	Bid;Nedd4	2	83	224	5988	0.823535
ko04010	MAPK signaling pathway	Fgfr3;Mef2c;Rps6ka5	3	83	319	5988	0.827083
ko04926	Relaxin signaling pathway	NEWGENE_621351	1	83	126	5988	0.830933
ko05170	Human immunodeficiency virus 1 infection	Bid;Cul1	2	83	238	5988	0.848815
ko04152	AMPK signaling pathway	Adipoq	1	83	137	5988	0.855497
ko04110	Cell cycle	Cul1	1	83	139	5988	0.859568
ko04151	PI3K-Akt signaling pathway	Fgfr3;Itgb4;NEWGENE_621351	3	83	341	5988	0.859996
ko05012	Parkinson disease	Atp5mc2	1	83	140	5988	0.861561
ko04550	Signaling pathways regulating pluripotency of stem cells	Fgfr3	1	83	144	5988	0.869257
ko04728	Dopaminergic synapse	Kif5a	1	83	145	5988	0.871113
ko04261	Adrenergic signaling in cardiomyocytes	Rps6ka5	1	83	150	5988	0.880014
ko05418	Fluid shear stress and atherosclerosis	Mef2c	1	83	155	5988	0.888307
ko04072	Phospholipase D signaling pathway	Ralgds	1	83	165	5988	0.903231
ko04921	Oxytocin signaling pathway	Mef2c	1	83	167	5988	0.90597
ko04150	mTOR signaling pathway	Atp6v1a	1	83	167	5988	0.90597
ko05161	Hepatitis B	Bid	1	83	168	5988	0.907311
ko05167	Kaposi sarcoma-associated herpesvirus infection	Bid	1	83	197	5988	0.938951
ko04020	Calcium signaling pathway	Stim1	1	83	200	5988	0.941539
ko05203	Viral carcinogenesis	Actn1	1	83	206	5988	0.946394
ko04080	Neuroactive ligand-receptor interaction	Penk;S1pr3	2	83	333	5988	0.950106
ko05205	Proteoglycans in cancer	Cttn	1	83	215	5988	0.952939
ko04714	Thermogenesis	Atp5mc2	1	83	230	5988	0.962138
ko05163	Human cytomegalovirus infection	Bid	1	83	243	5988	0.968657
